# Supplementary material
Source: PubMed Central journal article supplement (PMC4402359)
Supplement: supp_dju505_jnci_JNCI_14_0820_s01.pdf [file supp_dju505_jnci_JNCI_14_0820_s01.pdf]

# **Supplementary Materials**

## **Role of MYC-regulated long noncoding RNAs in cell cycle regulation and tumorigenesis**

**Taewan Kim, Young-Jun Jeon, Ri Cui, Ji-Hoon Lee, Yong Peng, Sung-Hak Kim, Esmerina Tili, Hansjuerg Alder and Carlo M. Croce**

## Supplementary Methods

**LncRNA microarray.** Total RNA extracted from 4 normal colon-derived fibroblast cell lines (CCD-18Co, CCD-33Co, CCD-112CoN, CCD-841CoN), 4 colorectal cancer (CRC) cell lines (HT29, SW620, HCT116, RKO), 3 primary CRC tissue samples and their matched NAT (Origene), HCT116 cells treated with siCTRL or siMYC and RKO cells treated with siCTRL or siMYC was subjected to lncRNA microarray. The 3 primary CRC or NAT samples were mixed respectively and then subjected to the lncRNA microarray. Briefly, mRNA was purified from 1 µg total RNA after removal of rRNA (mRNA-ONLY™ Eukaryotic mRNA Isolation Kit, Epicentre). Then, each sample was amplified and transcribed into fluorescent cRNA along the entire length of the transcripts without 3' bias utilizing a random priming method. The labeled cRNAs were hybridized onto the Human LncRNA Array v2.0 (8 x 60K, Arraystar). After having washed the slides, the arrays were scanned by the Agilent Scanner G2505B. Agilent Feature Extraction software (version 10.7.3.1) was used to analyze acquired array images. Quantile normalization and subsequent data processing were performed using the GeneSpring GX v11.5.1 software package (Agilent Technologies). After quantile normalization of the raw data, lncRNAs and mRNAs that at least 16 out of 22 samples have flags in Present or Marginal (“All Targets Value”) were chosen for further data analysis. Differentially expressed lncRNAs and mRNAs with statistical significance were identified through Volcano Plot filtering (more than 2 fold change of log<sub>2</sub>-transformed normalized intensity with p-value<0.05). Heat-maps of the differentially expressed lncRNAs and mRNAs were generated using dchip software.

**Patients and primary colorectal and prostate tissue samples.** Primary colorectal and prostate tissue samples were provided by the Department of Pathology, The Ohio State University (OSU). All human tissues were obtained according to a protocol approved by the Ohio State Institutional Review Board. Tissue samples were fresh-frozen in liquid nitrogen after surgery and kept at -80 °C. Frozen tissue samples were homogenized using the Tissue Ruptor (QIAGEN) before RNA extraction. Total RNA was extracted using Trizol (Invitrogen) in accordance with manufacturer’s instructions.

**Xenograft and tumor-free survival analysis.** Animal experiments were approved by the Ohio State University animal care and use committee and conducted following the Ohio State University animal policy in accordance with NIH guidelines. 0.5 million cells transfected with indicated siRNAs 24hr before injection were subcutaneously injected into the right flanks of 5-week-old female athymic nude mice (Jackson laboratory, 4 mice per group). Tumor initiation was observed and counted when a palpable tumor (approximately 50-60 mm<sup>3</sup>) formed. Tumor volume was determined by measuring the length and the width of the tumor mass and calculating the volume (Volume = (width)<sup>2</sup>(length)/2). The palpable mass was observed until the volume reached 100 mm<sup>3</sup> to verify that the palpable mass is a tumor mass. The parental HCT116 and PC3 cells that were not transfected with siRNA were also injected, and the results of tumor-free survival with parental cells showed similar results with control siRNA-transfected cells. All athymic nude mice developed palpable tumors in 5 weeks after injection with the parental cells.

**NanoString gene expression assay and data analysis.** For NanoString Gene expression assay analyses, the nCounter Virtual Cell Cycle Gene Set was used, following manufacturer's instructions (NanoString Technologies). Briefly, total RNA (100ng) was used as input for nCounter mRNA sample preparation reactions. All sample preparation was performed according to manufacturer's instructions (NanoString Technologies). Hybridization reactions were performed according to manufacturer's instructions with 5µl of the 5-fold diluted sample preparation reaction. All hybridization reactions were incubated at 64°C for a minimum of 18 h. Hybridized probes were purified and counted on the nCounter Prep Station and Digital Analyzer (NanoString Technologies) following the manufacturer's instructions. For each assay, a high-density scan (600 fields of view) was performed. Data analysis was performed using the nSolver analysis software (NanoString Technologies) and dChip software.

**Rapid amplification of cDNA ends (RACE).** 5' and 3' RACE were performed using the SMARTer RACE cDNA Amplification Kit (Clontech). All procedures were done in

accordance with manufacturer's instruction. Total RNA from HT29 or SW620 was used. PCR of the internal region was performed when starting points of 5' and 3' RACE had an unamplified gap. All primers used for RACE are presented in Supplementary Table 5.

**Cells, oligonucleotides and transfection.** All human cell lines (HCT116, RKO, HT29 and SW620 from colorectal cancer; A549 from lung cancer; PC3 from prostate cancer; MCF7 and SKBR3 from breast cancer; HepG2 and SK-HEP-1 from liver cancer; CCD-18Co, CCD-33Co, CCD-112CoN and CCD-841CoN from normal colon) were purchased from ATCC and cultured in Eagle's Minimum Essential Medium with 10% heat-inactivated fetal bovine serum. All experiments with cells were done between passage 4-9. All custom siRNAs were designed by the Dharmacon custom siRNA design tool based on sequence information identified by RACE. For each MYC<sup>Lo</sup>, 2 kinds of custom siRNAs were designed and used. All sequence information of the siRNAs is shown in Supplementary Table 6. The siRNAs targeting MYC were from Dharmacon (siMYC) or Santa Cruz Biotechnology (siMYC-2). Cells were transfected with Lipofectamine RNAiMAX (Invitrogen) for oligonucleotides, Lipofectamine LTX for plasmids and Lipofectamine 2000 for oligonucleotides/plasmids cotransfection in accordance with manufacturer's instructions. In all transfections of siRNAs, final concentration of siRNAs was 50nM for transfection of 1-3 oligonucleotides or 100nM for transfection of more than 3 oligonucleotides.

**Quantitative real-time (qRT) –PCR.** Total RNA was prepared from cells using TRIZOL (Invitrogen) in accordance with manufacturer's instructions. Total RNA was subjected to qRT-PCR. RNA levels were analyzed using TaqMan Gene Expression Assays, in accordance with manufacturer's instructions (Applied Biosystems). All RT reactions, including no-template controls and RT minus controls, were run in a GeneAmp PCR 9700 Thermocycler (Applied Biosystems). RNA concentrations were determined with a NanoDrop (NanoDrop Technologies, Inc.). Samples were normalized to GAPDH or OAZ1 for mRNAs and lncRNAs (Applied Biosystems). Gene expression levels were quantified using the ABI Prism 7900HT Sequence detection system (Applied Biosystems). Comparative real-time PCR was performed in triplicate, including no-

template controls. Relative expression was calculated using the comparative Ct method. Probes used for Taqman Assays are shown in Supplementary Table 6.

**Cell proliferation assay.** For cell proliferation assay, the MTS assay from Promega (CellTiter 96 AQueous One Solution Cell Proliferation Assay) was used following manufacturer's instruction. Briefly, cells in 96-wells plate were incubated for 72hr or 96 hr in a humidified 5% CO<sub>2</sub> atmosphere after transfection with indicated siRNAs, followed by addition of 20µl CellTiter 96 AQueous One Solution and 1-4hr incubation in humidified 5% CO<sub>2</sub> atmosphere. The absorbance at 490nm was recorded.

**Flow cytometry analysis.** For DNA content analysis, cells were fixed in methanol at -20° C, washed again, rehydrated, re-suspended in PBS containing 2 µg/ml propidium iodide (PI) and 5 µg/ml RNase A, and analyzed by BD FACS Calibur Flow Cytometer.

**Luciferase reporter assay.** Cells were plated in 24-well plates 24 hr before transfection. All plasmids constructed with pGL4-luc2P vectors were co-transfected with control Renilla luciferase plasmid (pGL4-hRluc/TK) and siRNAs as indicated by using Lipofectamine 2000 (Invitrogen). The ratio of experimental plasmid to control plasmid was 10:1. Luciferase assays were performed using the Dual-Luciferase Reporter Assay System (Promega). Briefly, 48 hr after transfection, cell lysates were prepared by incubating with 1×passive lysis buffer (PLB) for 15 min at room temperature. Cell lysates were transferred in triplicate to 96-well plates and analyzed using GloMax Luminometer (Promega) according to manufacturer's instructions. All primers used for cloning of luciferase constructs are presented in Supplementary Table 5.

**Soft agar colony formation assay.** Soft agar colony formation assay was performed with the CytoSelect cell transformation assay (Cell Biolab, Inc) in accordance with the manufacturer's instructions. The cells transfected with indicated siRNA were incubated for 24 hr followed by a soft agar colony formation assay.

**RNA pull-down assay, Deletion Mapping, RIP, ChIP and Antibodies.** RNA pull-down and deletion mapping were performed using a Magnetic RNA-Protein Pull-Down kit (Pierce) in accordance with the manufacturer's instructions. The full length or deleted

RNA samples were prepared using the LITMUS28i system and T7 *in vitro* transcription kit (NEB) followed by biotin-labeling at the 3' end of *in vitro* transcribed RNA using the RNA 3' End Desthiobiotinylation kit (Pierce). Nuclei from HeLa cells were prepared using the Qproteome Nuclear Protein kit (QIAGEN) and nuclear lysates from the nuclei were prepared as described (1). RIP was carried out using the Magna RIP RNA-Binding Protein Immunoprecipitation kit (Millipore). ChIP analysis was done with the Magna ChIP Chromatin Immunoprecipitation kit. The antibodies against HuR (4C8, mouse monoclonal) and hnRNPk (3C2, mouse monoclonal) were purchased from Abcam. The antibodies against p15 (D12, mouse monoclonal) and p53 (mouse monoclonal) were from Santa Cruz Biotechnology. The antibodies against MYC (D84C12, rabbit monoclonal), p21 (12D1, rabbit monoclonal), Miz-1 (rabbit monoclonal) and GAPDH (D16H11, rabbit monoclonal) were from Cell Signaling Technology. The antibodies were used for ChIP, RIP (~1-2ug) and Western Blot analyses (1:1000 dilution).

**Statistics.** All graph values represent means  $\pm$  S.D. from three independent experiments with each measured in triplicate. The differences between two groups were analyzed with unpaired two-sided Student's t-test.  $P < 0.05$  was considered statistically significant and indicated with asterisks as described in figure legends. The Kaplan–Meier method was used to estimate survival curves, and the log-rank test was used to test for differences between curves using SPSS Statistical Software (SPSS Inc., Chicago, IL). All statistical tests were two-sided.

**Data access.** The raw data of microarray analysis are deposited in the Gene Expression Omnibus (GEO) under accession number GSE39846. Primary data of Nanostring gene expression analysis are deposited in the GEO under accession number GSE39077. Sequence information of MYC<sub>Lo</sub>s is available in GenBank (Accession number: MYC<sub>Lo</sub>-1, JX046909; MYC<sub>Lo</sub>-2, JX046910; MYC<sub>Lo</sub>-3 v1, JX046911; MYC<sub>Lo</sub>-3 v2, JX628584).

**Liquid chromatography-tandem mass spectrometry (LC-MS/MS).**

LC-MS/MS was performed by the Campus Chemical Instrument Center (CCIC) Mass Spectrometry and Proteomics Facility at The Ohio State University (OSU).

## **Sample Preparation**

### **In Gel Digestion Manual**

Gels were digested with sequencing grade trypsin from Promega (Madison WI) or sequencing grade chymotrypsin from Roche T (Indianapolis, IN) using the Multiscreen Solvint Filter Plates from Millipore (Bedford, MA). Briefly, bands were trimmed as close as possible to minimize background polyacrylamide material. Gel pieces are then washed in nanopure water for 5 minutes. The wash step is repeated twice before gel pieces are washed and/or destained with 1:1 v/v methanol:50 mM ammonium bicarbonate for ten minutes twice. The gel pieces were dehydrated with 1:1 v/v acetonitrile: 50 mM ammonium bicarbonate. The gel bands were rehydrated and incubated with dithiothreitol (DTT) solution (25 mM in 100 mM ammonium bicarbonate) for 30 minutes prior to the addition of 55 mM Iodoacetamide in 100 mM ammonium bicarbonate solution. Iodoacetamide was incubated with the gel bands in dark for 30 min before removed. The gel bands were washed again with two cycles of water and dehydrated with 1:1 v/v acetonitrile: 50 mM ammonium bicarbonate. The protease is driven into the gel pieces by rehydrating them in 12 ng/ml trypsin in 0.01% ProteaseMAX Surfactant for 5 minutes. The gel piece is then overlaid with 40 ml of 0.01% ProteaseMAX surfactant:50 mM ammonium bicarbonate and gently mixed on a shaker for 1 hour. The digestion is stopped with addition of 0.5% TFA. The MS analysis is immediately performed to ensure high quality tryptic peptides with minimal non-specific cleavage or frozen at -80°C until samples can be analyzed.

### **In Gel Robot Digestion**

Bands were trimmed as close as possible to minimize background polyacrylamide material and placed in 96 well plates or the Ettan Spot Handling Workstation was used to core protein spots of interest using a pick list and placed in a 96 well plate. The 96 well plates were placed inside the Robot for wash and digestion following the Ettan Spot Handling Workstation 2.1 User Manual from Amersham Biosciences. Briefly, gel pieces are washed in 100 µL of 50% methanol/5% acetic acid for 30 minutes. The wash step was repeated a total of 3 times and placed in a storage solution of 50 µL of 50% methanol/5% acetic acid until digestion. Gels were digested with sequencing grade trypsin from Promega (Madison WI). Digestion was carried out by adding 100 µL water for 10 minutes followed by 100 µL acetonitrile for 10 minutes. The water and acetonitrile were removed and the gel bands were rehydrated and incubated with dithiothreitol (DTT) (prepared as 5 mg/ml in 100 mM ammonium bicarbonate) for 30 minutes prior to the addition of iodoacetamide (prepared as 15 mg/ml Iodoacetamide in 100 mM ammonium bicarbonate solution). Iodoacetamide was incubated with the gel bands in dark for 30

minutes before removed. The gel bands were washed again with cycles of acetonitrile and 100 mM ammonium bicarbonate in 10 and 5 minute increments. The gels were dried for 10 minutes and the protease was driven into the gel pieces by rehydrating them in 25  $\mu$ L of sequencing grade modified trypsin prepared at 5  $\mu$ g/mL in 50 mM ammonium bicarbonate for 180 minutes. The peptides were extracted from the polyacrylamide with 50  $\mu$ L 50% acetonitrile and 5% formic acid a total of 3 times and pooled together. 50  $\mu$ L of acetonitrile was added to the extraction for 15 minutes. The extracted pools were dried for 15 minutes and removed immediately to prevent complete drying.



## Mass Spectrometry

**LTQ.** Capillary-liquid chromatography tandem mass spectrometry (Cap-LC/MS/MS) was performed on a Thermo Finnigan LTQ mass spectrometer equipped with a CaptiveSpray source (Bruker Michrom Billerica, MA) operated in positive ion mode. The LC system was an UltiMate™ 3000 system from Dionex (Sunnyvale, CA). The solvent A was water containing 50mM acetic acid and the solvent B was acetonitrile. 5  $\mu$ L of each sample was first injected on to the  $\mu$ -Precolumn Cartridge (Dionex, Sunnyvale, CA), and washed with 50 mM acetic acid. The injector port was switched to inject and the peptides were eluted off of the trap onto the column. A 0.2x150mm, 3 $\mu$ , 200A, Magic C18 (Bruker Michrom Billerica, MA) was used for chromatographic separations. Peptides were eluted directly off the column into the LTQ system using a gradient of 2-80%B over 45 minutes, with a flow rate of 2 $\mu$ l/min. The total run time was 65 minutes. The MS/MS was acquired according to standard conditions established in the lab. Briefly, a CaptiveSpray source operated with a spray voltage of 3 KV and a capillary temperature of 200P<sup>o</sup>C is used. The scan sequence of the mass spectrometer was based on the TopTen™ method; the analysis was programmed for a full scan recorded between 350 – 2000 Da, and a MS/MS scan to generate product ion spectra to determine amino acid sequence in consecutive instrument scans of the ten most abundant peak in the spectrum. The AGC Target ion number was set at 30000 ions for full scan and 10000 ions for MS<sub>n</sub> mode. Maximum ion injection time was set at 20 ms for full scan and 300 ms for MS<sub>n</sub> mode. Micro scan number was set at 1 for both full scan and MS<sub>n</sub> scan. The CID fragmentation energy was set to 35%. Dynamic exclusion was enabled with a repeat count of 2 within 10 seconds, a mass list size of 200, an exclusion duration 350 seconds, the low mass width was 0.5 and the high mass width was 1.5.

Sequence information from the MS/MS data was processed by converting the .raw files into a merged file (.mgf) using an in-house program, RAW2MZXML\_n\_MGF\_batch (merge.pl, a Perl script). The resulting mgf files were searched using Mascot Daemon by Matrix Science version 2.3.2 (Boston, MA) and the database searched against the full SwissProt database version 2012\_06 (536,489 sequences; 190,389,898 residues) or NCBI database version 20120515 (18,099,548 sequences; 6,208,559,787 residues). The mass accuracy of the precursor ions were set to 1.8 Da and the fragment mass accuracy was set to 0.8 Da. Considered variable modifications were methionine oxidation and deamidation NQ. Fixed modification for carbamidomethyl cysteine was considered. Two missed cleavages for the enzyme were permitted. A decoy database was searched to determine the false discovery rate (FDR) and peptides were filtered according to the FDR and proteins identified required bold red peptides. Protein identifications were checked manually and proteins with a Mascot score of 50 or higher with a minimum of

two unique peptides from one protein having a *-b* or *-y* ion sequence tag of five residues or better were accepted.

**LTQ Orbitrap.** Capillary-liquid chromatography-nanospray tandem mass spectrometry (Capillary-LC/MS/MS) of global protein identification was performed on a Thermo Finnigan LTQ orbitrap mass spectrometer equipped with a microspray source (Michrom Bioresources Inc, Auburn, CA) operated in positive ion mode. Samples were separated on a capillary column (0.2X150mm Magic C18AQ 3 $\mu$  200A, Michrom Bioresources Inc, Auburn, CA) using an UltiMate™ 3000 HPLC system from LC-Packings A Dionex Co (Sunnyvale, CA). Each sample was injected into the  $\mu$ -Precolumn Cartridge (Dionex, Sunnyvale, CA) and desalted with 50 mM acetic acid for 5 minutes. The injector port was then switched to inject and the peptides were eluted off of the trap onto the column. Mobile phase A was 50mM acetic acid in water and acetonitrile was used as mobile phase B. Flow rate was set at 2 $\mu$ l/min. Typically, mobile phase B was increased from 2% to 50% in 90-250 min, depending on the complexity of the sample, to separate the peptides. Mobile B was then increased from 50%-90% in 5 min and then kept at 90% for another 5 min before being brought back quickly to 2% in 1 min. The column was equilibrated at 2% of mobile phase B (or 98% A) for 30 min before the next sample injection. MS/MS data was acquired with a spray voltage of 2.2 KV and a capillary temperature of 175 °C is used. The scan sequence of the mass spectrometer was based on the preview mode data dependent TopFive™ method: the analysis was programmed for a full scan recorded between *m/z* 300 – 2000 and a MS/MS scan to generate product ion spectra to determine amino acid sequence in consecutive scans of the five most abundant peaks in the spectrum. To achieve high mass accuracy MS determination, the full scan was performed at FT mode and the resolution was set at 60,000. The AGC Target ion number for FT full scan was set at 1 x 10<sup>6</sup> ions, maximum ion injection time was set at 1000 ms and micro scan number was set at 1. MSn was performed using ion trap mode to ensure the highest signal intensity of MSn spectra. The AGC Target ion number for ion trap MSn scan was set at 10000 ions, maximum ion injection time was set at 300 ms and micro scan number was set at 1. The CID fragmentation energy was set to 35%. Dynamic exclusion is enabled with a repeat count of 3 within 30 s, a mass list size limit of 200, exclusion duration of 350 s and a low mass width of 0.50 and high mass width of 1.50 Da.

Sequence information from the MS/MS data was processed by converting the .raw files into a merged file (.mgf) using an in-house program, RAW2MZXML\_n\_MGF\_batch (merge.pl, a Perl script). Isotope distributions for the precursor ions of the MS/MS spectra were deconvoluted to obtain the charge states and monoisotopic *m/z* values of the precursor ions during the data conversion. The resulting mgf files were searched using

Mascot Daemon by Matrix Science version 2.3.2 (Boston, MA) and the database searched against the full SwissProt database version 2012\_06 (536,489 sequences; 190,389,898 residues) or NCBI database version 20120515 (18,099,548 sequences; 6,208,559,787 residues). The mass accuracy of the precursor ions were set to 20ppm, accidental pick of  $^{13}\text{C}$  peaks was also included into the search. The fragment mass tolerance was set to 0.5 Da. Considered variable modifications were oxidation (Met), deamidation (N and Q) and carbamidomethylation (Cys). Four missed cleavages for the enzyme were permitted. A decoy database was also searched to determine the false discovery rate (FDR) and peptides were filtered according to the FDR. The significance threshold was set at  $p < 0.05$  and bold red peptides is required for valid peptide identification. Proteins with a Mascot score of 50 or higher with a minimum of two unique peptides from one protein having a *-b* or *-y* ion sequence tag of five residues or better were accepted. Any modifications or low score peptide/protein identifications were manually checked for validation.

### **Spectral Counting**

Label Free Quantitation was performed using the spectral counting approach. Scaffold (version Scaffold\_3.4.9, Proteome Software Inc., Portland, OR) was used to validate MS/MS based peptide and protein identifications. Peptide identifications were accepted if they could be established at greater than 95.0% probability as specified by the Peptide Prophet algorithm (Keller, A et al Anal. Chem. 2002;74(20):5383-92). Protein identifications were accepted if they could be established at greater than 95.0% probability and contained at least 1 identified peptides. Protein probabilities were assigned by the Protein Prophet algorithm (Nesvizhskii, AI Anal Chem. 2003 Sep 1;75(17):4646-58). Proteins that contained similar peptides and could not be differentiated based on MS/MS analysis alone were grouped to satisfy the principles of parsimony.

1. Tsai MC, Manor O, Wan Y, Mosammaparast N, Wang JK, Lan F, et al. Long noncoding RNA as modular scaffold of histone modification complexes. Science 2010;329(5992):689-93.

## **Supplementary Tables**

### **Role of MYC-regulated long noncoding RNAs in cell cycle regulation and tumorigenesis**

**Taewan Kim, Young-Jun Jeon, Ri Cui, Ji-Hoon Lee, Yong Peng, Sung-Hak Kim, Esmerina Tili, Hansjuerg Alder and Carlo M. Croce**

**Supplementary Table 1. The list of mRNAs and lncRNAs dysregulated in CRC.**

# Fold Change cut-off: 2.0

# P-value cut-off: 0.05

# Condition pairs: CRC\_vs\_Normal

# ProbeName it represents probe name.

# P-value, P-value calculated from unpaired t-test.

# FDR, FDR is calculated from Benjamini Hochberg FDR.

# FC (abs), the absolute ratio (no log scale) of normalized intensities between two conditions.

# Regulation, it depicts which group has greater or lower intensity values wrt other group.

**Supplementary Table 1-1. The list of mRNAs upregulated in CRC.**

| ProbeName       | P-value and FDR |          | Fold change and Regulation |            | type   | seqname      | GeneSymbol | chrom | strand |
|-----------------|-----------------|----------|----------------------------|------------|--------|--------------|------------|-------|--------|
|                 | p-value         | FDR      | FCAbsolute                 | regulation |        |              |            |       |        |
| ASHG19A3A000541 | 0.023479        | 0.189502 | 3.166926                   | up         | coding | NM_000103    | CYP19A1    | chr15 | -      |
| ASHG19A3A000573 | 0.0244          | 0.192501 | 2.810487                   | up         | coding | NM_000382    | ALDH3A2    | chr17 | +      |
| ASHG19A3A000639 | 0.014595        | 0.152608 | 2.017064                   | up         | coding | NM_000973    | RPL8       | chr8  | -      |
| ASHG19A3A000640 | 0.000877        | 0.047999 | 2.133357                   | up         | coding | NM_000977    | RPL13      | chr16 | +      |
| ASHG19A3A000702 | 0.041087        | 0.241118 | 2.410953                   | up         | coding | NM_001002019 | PUS1       | chr12 | +      |
| ASHG19A3A000737 | 0.012756        | 0.14245  | 6.377234                   | up         | coding | NM_001003396 | TPD52L1    | chr6  | +      |
| ASHG19A3A000738 | 0.008979        | 0.122004 | 7.488082                   | up         | coding | NM_001003397 | TPD52L1    | chr6  | +      |
| ASHG19A3A000753 | 0.041383        | 0.241949 | 2.309692                   | up         | coding | NM_001003704 | MTP18      | chr22 | +      |
| ASHG19A3A000762 | 0.017941        | 0.167008 | 2.199893                   | up         | coding | NM_001003802 | SMARCD3    | chr7  | -      |
| ASHG19A3A000775 | 0.001616        | 0.060276 | 3.239024                   | up         | coding | NM_001004340 | FCGR1B     | chr1  | -      |
| ASHG19A3A000787 | 0.045293        | 0.253239 | 2.929677                   | up         | coding | NM_001005336 | DNM1       | chr9  | +      |

|                 |          |          |          |    |        |              |            |       |   |
|-----------------|----------|----------|----------|----|--------|--------------|------------|-------|---|
| ASHG19A3A000844 | 0.006419 | 0.106091 | 2.936929 | up | coding | NM_001007088 | ZNF182     | chrX  | - |
| ASHG19A3A000855 | 0.015383 | 0.155585 | 2.783668 | up | coding | NM_001007273 | DUSP13     | chr10 | - |
| ASHG19A3A000919 | 0.014341 | 0.151394 | 2.168044 | up | coding | NM_001009943 | ANKRD16    | chr10 | - |
| ASHG19A3A000938 | 0.020745 | 0.17855  | 2.591393 | up | coding | NM_001011671 | CHCHD7     | chr8  | + |
| ASHG19A3A001078 | 0.046556 | 0.256323 | 8.389398 | up | coding | NM_001024024 | GCH1       | chr14 | - |
| ASHG19A3A001079 | 0.020411 | 0.177218 | 8.17045  | up | coding | NM_001024070 | GCH1       | chr14 | - |
| ASHG19A3A001080 | 0.033577 | 0.221543 | 7.939452 | up | coding | NM_001024071 | GCH1       | chr14 | - |
| ASHG19A3A001170 | 0.036709 | 0.230049 | 4.502094 | up | coding | NM_001031733 | CALML4     | chr15 | - |
| ASHG19A3A001171 | 0.035143 | 0.225952 | 2.851474 | up | coding | NM_001031739 | ASB9       | chrX  | - |
| ASHG19A3A001172 | 0.000227 | 0.029723 | 18.54976 | up | coding | NM_001031740 | MANEAL     | chr1  | + |
| ASHG19A3A001174 | 0.015528 | 0.156379 | 35.16459 | up | coding | NM_001031803 | LLGL2      | chr17 | + |
| ASHG19A3A001178 | 0.040107 | 0.238697 | 2.678417 | up | coding | NM_001032284 | TMPO       | chr12 | + |
| ASHG19A3A001234 | 0.008276 | 0.11853  | 9.915642 | up | coding | NM_145654    | RDM1       | chr17 | - |
| ASHG19A3A001272 | 0.003209 | 0.081674 | 29.09617 | up | coding | NM_001038603 | MARVELD2   | chr5  | + |
| ASHG19A3A001325 | 0.037243 | 0.231712 | 2.386665 | up | coding | NM_001040006 | TCERG1     | chr5  | + |
| ASHG19A3A001344 | 0.003037 | 0.080155 | 3.783003 | up | coding | NM_001040135 | ACTR3B     | chr7  | + |
| ASHG19A3A001417 | 0.010678 | 0.131378 | 2.867689 | up | coding | NM_001042453 | MST4       | chrX  | + |
| ASHG19A3A001429 | 0.000283 | 0.031138 | 2.147888 | up | coding | NM_016096    | ZNF706     | chr8  | - |
| ASHG19A3A001470 | 0.036433 | 0.229406 | 2.949389 | up | coding | NM_001048199 | SNHG3-RCC1 | chr1  | + |
| ASHG19A3A001507 | 0.008351 | 0.118817 | 2.026706 | up | coding | NM_001077441 | BCLAF1     | chr6  | - |
| ASHG19A3A001573 | 0.001766 | 0.062085 | 2.331098 | up | coding | NM_001080124 | CASP8      | chr2  | + |
| ASHG19A3A001599 | 0.015563 | 0.156493 | 2.265888 | up | coding | NM_001082486 | ACD        | chr16 | - |
| ASHG19A3A001600 | 0.014534 | 0.152522 | 2.127417 | up | coding | NM_001082487 | ACD        | chr16 | - |
| ASHG19A3A001698 | 0.006751 | 0.109129 | 2.242801 | up | coding | NM_001098786 | C7orf68    | chr7  | + |
| ASHG19A3A001835 | 0.00099  | 0.050681 | 2.158015 | up | coding | NM_001103160 | SH2D5      | chr1  | - |
| ASHG19A3A001886 | 0.003432 | 0.083068 | 42.182   | up | coding | NM_001113206 | TSTD1      | chr1  | - |
| ASHG19A3A001889 | 0.007797 | 0.116887 | 4.870248 | up | coding | NM_001113482 | MANEAL     | chr1  | + |
| ASHG19A3A001890 | 0.002108 | 0.067384 | 2.308276 | up | coding | NM_001113511 | ARHGEF7    | chr13 | + |
| ASHG19A3A001898 | 0.005009 | 0.095955 | 2.635377 | up | coding | NM_012410    | SEZ6L2     | chr16 | - |
| ASHG19A3A001935 | 0.049341 | 0.26375  | 2.269858 | up | coding | NM_001122630 | CDKN1C     | chr11 | - |

|                 |          |          |          |    |        |              |         |       |   |
|-----------------|----------|----------|----------|----|--------|--------------|---------|-------|---|
| ASHG19A3A001957 | 0.002783 | 0.076178 | 10.54328 | up | coding | NM_001126056 | DMKN    | chr19 | - |
| ASHG19A3A001958 | 0.000148 | 0.026643 | 132.1146 | up | coding | NM_001126057 | DMKN    | chr19 | - |
| ASHG19A3A001959 | 0.000786 | 0.045956 | 12.72529 | up | coding | NM_001126059 | DMKN    | chr19 | - |
| ASHG19A3A001960 | 0.001361 | 0.055969 | 37.89222 | up | coding | NM_001126061 | DMKN    | chr19 | - |
| ASHG19A3A001961 | 0.000652 | 0.042495 | 59.48117 | up | coding | NM_033317    | DMKN    | chr19 | - |
| ASHG19A3A001963 | 0.015868 | 0.157779 | 2.430504 | up | coding | NM_001126105 | SLC7A7  | chr14 | - |
| ASHG19A3A002021 | 0.008165 | 0.118004 | 2.006941 | up | coding | NM_001127496 | SPRY4   | chr5  | - |
| ASHG19A3A002098 | 0.010251 | 0.128875 | 3.371576 | up | coding | NM_032620    | GTPBP3  | chr19 | + |
| ASHG19A3A002115 | 0.001012 | 0.051214 | 2.422407 | up | coding | NM_001129728 | PLEKHG4 | chr16 | + |
| ASHG19A3A002118 | 0.03022  | 0.21235  | 4.937256 | up | coding | NM_001129826 | CSAG3   | chrX  | + |
| ASHG19A3A002119 | 0.049957 | 0.264788 | 8.966136 | up | coding | NM_001129828 | CSAG3   | chrX  | + |
| ASHG19A3A002165 | 0.004308 | 0.090342 | 4.987612 | up | coding | NM_001130159 | STOX1   | chr10 | + |
| ASHG19A3A002166 | 0.018629 | 0.170157 | 4.328495 | up | coding | NM_001130160 | STOX1   | chr10 | + |
| ASHG19A3A002180 | 0.038941 | 0.236253 | 2.130229 | up | coding | NM_001130519 | ZNF195  | chr11 | - |
| ASHG19A3A002203 | 0.036176 | 0.228491 | 2.287528 | up | coding | NM_001130858 | PIIP5K1 | chr15 | - |
| ASHG19A3A002213 | 0.020723 | 0.178522 | 2.685264 | up | coding | NM_001130921 | RABL2B  | chr22 | - |
| ASHG19A3A002218 | 0.011415 | 0.135662 | 2.015102 | up | coding | NM_001130976 | DYSF    | chr2  | + |
| ASHG19A3A002226 | 0.029448 | 0.210017 | 2.640426 | up | coding | NM_001131024 | PEX5    | chr12 | + |
| ASHG19A3A002256 | 0.04492  | 0.252593 | 2.524265 | up | coding | NM_001134431 | TOR2A   | chr9  | - |
| ASHG19A3A002279 | 3.26E-05 | 0.016153 | 4.837586 | up | coding | NM_001134852 | TCF7    | chr5  | + |
| ASHG19A3A002361 | 0.019973 | 0.175878 | 9.784492 | up | coding | NM_001135812 | FAM60A  | chr12 | - |
| ASHG19A3A002382 | 0.001976 | 0.065264 | 2.061776 | up | coding | NM_001136001 | ABL2    | chr1  | - |
| ASHG19A3A002441 | 0.038597 | 0.235303 | 3.221481 | up | coding | NM_001136504 | SYT2    | chr1  | - |
| ASHG19A3A002443 | 0.031065 | 0.213978 | 2.249843 | up | coding | NM_001136540 | APOL1   | chr22 | + |
| ASHG19A3A002500 | 0.009961 | 0.127353 | 3.303087 | up | coding | NM_001142350 | THOC6   | chr16 | + |
| ASHG19A3A002505 | 0.019666 | 0.174937 | 3.101766 | up | coding | NM_001142370 | PTPN18  | chr2  | + |
| ASHG19A3A002553 | 0.005735 | 0.10188  | 2.172263 | up | coding | NM_001142530 | BHLHB9  | chrX  | + |
| ASHG19A3A002666 | 0.001798 | 0.0627   | 4.200184 | up | coding | NM_001143994 | RASSF7  | chr11 | + |
| ASHG19A3A002695 | 0.00233  | 0.070778 | 4.962551 | up | coding | NM_001144887 | CITED1  | chrX  | - |
| ASHG19A3A002764 | 4.92E-07 | 0.003088 | 3.166865 | up | coding | NM_001145148 | CRHR1   | chr17 | + |

|                 |          |          |          |    |        |              |         |       |   |
|-----------------|----------|----------|----------|----|--------|--------------|---------|-------|---|
| ASHG19A3A002815 | 0.010627 | 0.131368 | 2.080498 | up | coding | NM_001145394 | TSEN2   | chr3  | + |
| ASHG19A3A002834 | 0.005955 | 0.103105 | 2.978173 | up | coding | NM_001145466 | NCR3    | chr6  | - |
| ASHG19A3A002878 | 0.033616 | 0.221614 | 2.773279 | up | coding | NM_001145860 | POP1    | chr8  | + |
| ASHG19A3A002945 | 0.017647 | 0.165663 | 2.563436 | up | coding | NM_001146259 | PIP4K2C | chr12 | + |
| ASHG19A3A002951 | 0.014192 | 0.150397 | 4.283405 | up | coding | NM_001146274 | TCF7L2  | chr10 | + |
| ASHG19A3A002966 | 0.00017  | 0.026643 | 2.195162 | up | coding | NM_001146333 | SUMF2   | chr7  | + |
| ASHG19A3A002971 | 0.004031 | 0.087853 | 2.584361 | up | coding | NM_001146590 | AGXT2L1 | chr4  | - |
| ASHG19A3A003009 | 0.001171 | 0.053795 | 13.70792 | up | coding | NM_001159629 | SLC27A2 | chr15 | + |
| ASHG19A3A003085 | 0.012722 | 0.142319 | 3.74154  | up | coding | NM_001161357 | FCHO1   | chr19 | + |
| ASHG19A3A003148 | 0.022994 | 0.18762  | 3.253503 | up | coding | NM_001163122 | RDM1    | chr17 | - |
| ASHG19A3A003162 | 0.000265 | 0.031138 | 2.107367 | up | coding | NM_001163377 | QPCTL   | chr19 | + |
| ASHG19A3A003178 | 0.035978 | 0.228089 | 3.82889  | up | coding | NM_001163814 | C10orf2 | chr10 | + |
| ASHG19A3A003257 | 0.003566 | 0.083739 | 2.235401 | up | coding | NM_001164721 | PTAFR   | chr1  | - |
| ASHG19A3A003336 | 0.048979 | 0.262507 | 30.82324 | up | coding | NM_001166103 | SPINT2  | chr19 | + |
| ASHG19A3A003340 | 0.003622 | 0.084313 | 2.379888 | up | coding | NM_001166131 | EME1    | chr17 | + |
| ASHG19A3A003344 | 0.046304 | 0.255817 | 5.993146 | up | coding | NM_001166162 | PPP1R9A | chr7  | + |
| ASHG19A3A003345 | 0.007375 | 0.113291 | 4.341711 | up | coding | NM_001166163 | PPP1R9A | chr7  | + |
| ASHG19A3A003353 | 0.009933 | 0.127353 | 2.30816  | up | coding | NM_001166240 | CGREF1  | chr2  | - |
| ASHG19A3A003465 | 1.44E-05 | 0.01403  | 82.23893 | up | coding | NM_001168325 | TESC    | chr12 | - |
| ASHG19A3A003471 | 0.001595 | 0.059848 | 2.15829  | up | coding | NM_001168347 | NSUN5   | chr7  | - |
| ASHG19A3A003484 | 0.004359 | 0.090814 | 2.022783 | up | coding | NM_001168466 | MAP7D2  | chrX  | - |
| ASHG19A3A003540 | 0.001433 | 0.057431 | 3.955848 | up | coding | NM_001170796 | ZFAND1  | chr8  | - |
| ASHG19A3A003553 | 0.015287 | 0.155107 | 3.200811 | up | coding | NM_001171089 | CLCN2   | chr3  | - |
| ASHG19A3A003659 | 0.040814 | 0.240602 | 2.277915 | up | coding | NM_001172573 | SSTR5   | chr16 | + |
| ASHG19A3A003708 | 0.005943 | 0.103084 | 6.860376 | up | coding | NM_001173463 | KIF21A  | chr12 | - |
| ASHG19A3A003711 | 0.043203 | 0.247447 | 2.09385  | up | coding | NM_001173466 | AAAS    | chr12 | - |
| ASHG19A3A003729 | 0.000762 | 0.045276 | 2.12697  | up | coding | NM_001173990 | TMEM216 | chr11 | + |
| ASHG19A3A003780 | 0.000938 | 0.049896 | 2.306507 | up | coding | NM_001177549 | SIGLEC6 | chr19 | - |
| ASHG19A3A003812 | 0.002061 | 0.066799 | 2.221901 | up | coding | NM_001178029 | DCI     | chr16 | - |
| ASHG19A3A003825 | 0.025033 | 0.194638 | 4.681359 | up | coding | NM_001178076 | ASNS    | chr7  | - |



|                 |          |          |          |    |        |              |               |       |   |
|-----------------|----------|----------|----------|----|--------|--------------|---------------|-------|---|
| ASHG19A3A003826 | 0.004805 | 0.094061 | 2.696337 | up | coding | NM_001178077 | ASNS          | chr7  | - |
| ASHG19A3A003916 | 0.008491 | 0.11964  | 3.100616 | up | coding | NM_001538    | HSF4          | chr16 | + |
| ASHG19A3A003954 | 0.004881 | 0.094714 | 2.880291 | up | coding | NM_001874    | CPM           | chr12 | - |
| ASHG19A3A003963 | 0.002019 | 0.066013 | 2.134447 | up | coding | NM_001919    | DCI           | chr16 | - |
| ASHG19A3A004006 | 0.017511 | 0.165332 | 2.405932 | up | coding | NM_002287    | LAIR1         | chr19 | - |
| ASHG19A3A004017 | 0.000133 | 0.026643 | 3.377888 | up | coding | NM_002376    | MARK3         | chr14 | + |
| ASHG19A3A004167 | 0.006325 | 0.105194 | 2.003813 | up | coding | NM_003616    | SIP1          | chr14 | + |
| ASHG19A3A004178 | 0.014127 | 0.150369 | 4.983047 | up | coding | NM_003710    | SPINT1        | chr15 | + |
| ASHG19A3A004265 | 0.030329 | 0.212773 | 3.711117 | up | coding | NM_004313    | ARRB2         | chr17 | + |
| ASHG19A3A004285 | 0.00748  | 0.114158 | 12.12594 | up | coding | NM_004428    | EFNA1         | chr1  | + |
| ASHG19A3A004288 | 0.003457 | 0.083068 | 2.424141 | up | coding | NM_004437    | EPB41         | chr1  | + |
| ASHG19A3A004304 | 0.010205 | 0.128875 | 42.63385 | up | coding | NM_004524    | LLGL2         | chr17 | + |
| ASHG19A3A004363 | 0.008377 | 0.118908 | 3.829075 | up | coding | NM_005063    | SCD           | chr10 | + |
| ASHG19A3A004367 | 0.003345 | 0.083054 | 2.089586 | up | coding | NM_005090    | JMJD7-PLA2G4B | chr15 | + |
| ASHG19A3A004396 | 0.005613 | 0.100699 | 3.369277 | up | coding | NM_005367    | MAGEA12       | chrX  | - |
| ASHG19A3A004425 | 0.019225 | 0.173143 | 2.106743 | up | coding | NM_005685    | GTF2IRD1      | chr7  | + |
| ASHG19A3A004433 | 0.018503 | 0.169813 | 2.383255 | up | coding | NM_005754    | G3BP1         | chr5  | + |
| ASHG19A3A004486 | 0.000946 | 0.049969 | 3.601666 | up | coding | NM_006340    | BAIAP2        | chr17 | + |
| ASHG19A3A004526 | 0.02023  | 0.176782 | 2.800609 | up | coding | NM_006603    | STAG2         | chrX  | + |
| ASHG19A3A004530 | 0.000207 | 0.028284 | 2.640979 | up | coding | NM_006641    | CCR9          | chr3  | + |
| ASHG19A3A004572 | 0.005836 | 0.102708 | 2.802954 | up | coding | NM_007017    | SOX30         | chr5  | - |
| ASHG19A3A004573 | 0.040846 | 0.240602 | 3.481687 | up | coding | NM_007019    | UBE2C         | chr20 | + |
| ASHG19A3A004584 | 0.036791 | 0.230413 | 2.577134 | up | coding | NM_007097    | CLTB          | chr5  | - |
| ASHG19A3A004602 | 0.00159  | 0.059794 | 2.008622 | up | coding | NM_007294    | BRCA1         | chr17 | - |
| ASHG19A3A004613 | 1.7E-05  | 0.015208 | 2.843573 | up | coding | NM_007349    | PAXIP1        | chr7  | - |
| ASHG19A3A004622 | 0.019417 | 0.174129 | 6.190633 | up | coding | NM_012105    | BACE2         | chr21 | + |
| ASHG19A3A004687 | 0.019603 | 0.174879 | 2.321116 | up | coding | NM_013952    | PAX8          | chr2  | - |
| ASHG19A3A004702 | 0.001235 | 0.054115 | 2.11654  | up | coding | NM_014031    | SLC27A6       | chr5  | + |
| ASHG19A3A004748 | 0.000701 | 0.044249 | 2.281509 | up | coding | NM_014596    | ZNRD1         | chr6  | + |
| ASHG19A3A004797 | 0.002503 | 0.071789 | 2.706043 | up | coding | NM_015136    | STAB1         | chr3  | + |

|                 |          |          |          |    |        |           |          |       |   |
|-----------------|----------|----------|----------|----|--------|-----------|----------|-------|---|
| ASHG19A3A004811 | 0.000813 | 0.046831 | 2.589689 | up | coding | NM_015356 | SCRIB    | chr8  | - |
| ASHG19A3A004854 | 0.001569 | 0.059794 | 5.859383 | up | coding | NM_015925 | LSR      | chr19 | + |
| ASHG19A3A004904 | 0.000221 | 0.029361 | 2.38154  | up | coding | NM_016499 | TMEM216  | chr11 | + |
| ASHG19A3A004941 | 0.02     | 0.175921 | 2.226051 | up | coding | NM_017458 | MVP      | chr16 | + |
| ASHG19A3A004993 | 0.00144  | 0.057575 | 2.038089 | up | coding | NM_018000 | MREG     | chr2  | - |
| ASHG19A3A005029 | 0.019543 | 0.174463 | 2.361979 | up | coding | NM_018330 | KIAA1598 | chr10 | - |
| ASHG19A3A005090 | 0.039235 | 0.236631 | 2.503006 | up | coding | NM_018959 | DAZAP1   | chr19 | + |
| ASHG19A3A005152 | 0.002592 | 0.072555 | 2.286278 | up | coding | NM_020442 | VAR52    | chr6  | + |
| ASHG19A3A005159 | 0.039861 | 0.238303 | 2.711251 | up | coding | NM_020477 | ANK1     | chr8  | - |
| ASHG19A3A005196 | 0.021922 | 0.182995 | 7.035093 | up | coding | NM_021154 | PSAT1    | chr9  | + |
| ASHG19A3A005221 | 0.014943 | 0.153769 | 2.092953 | up | coding | NM_021723 | ADAM22   | chr7  | + |
| ASHG19A3A005230 | 0.010681 | 0.131378 | 4.20257  | up | coding | NM_021830 | C10orf2  | chr10 | + |
| ASHG19A3A005233 | 0.005276 | 0.098632 | 4.427217 | up | coding | NM_021907 | DTNB     | chr2  | - |
| ASHG19A3A005255 | 0.017714 | 0.165833 | 2.35851  | up | coding | NM_022138 | SMOC2    | chr6  | + |
| ASHG19A3A005285 | 0.000186 | 0.027342 | 2.564525 | up | coding | NM_022560 | GH1      | chr17 | - |
| ASHG19A3A005358 | 0.034974 | 0.225239 | 2.779689 | up | coding | NM_024507 | KREMEN2  | chr16 | + |
| ASHG19A3A005387 | 0.023862 | 0.191098 | 2.168455 | up | coding | NM_024918 | DSN1     | chr20 | - |
| ASHG19A3A005408 | 0.015064 | 0.154264 | 3.573362 | up | coding | NM_025259 | MSH5     | chr6  | + |
| ASHG19A3A005458 | 0.044386 | 0.250834 | 3.099693 | up | coding | NM_031311 | CPVL     | chr7  | - |
| ASHG19A3A005531 | 0.000638 | 0.042459 | 10.17551 | up | coding | NM_032521 | PARD6B   | chr20 | + |
| ASHG19A3A005562 | 0.03947  | 0.237097 | 2.125345 | up | coding | NM_032960 | MAPKAPK2 | chr1  | + |
| ASHG19A3A005579 | 0.031276 | 0.214234 | 5.751629 | up | coding | NM_033023 | PDGFA    | chr7  | - |
| ASHG19A3A005650 | 0.002598 | 0.072555 | 2.397781 | up | coding | NM_033508 | GCK      | chr7  | - |
| ASHG19A3A005732 | 0.020042 | 0.175956 | 5.576812 | up | coding | NM_080632 | UPF3B    | chrX  | - |
| ASHG19A3A005906 | 0.008067 | 0.117217 | 5.041108 | up | coding | NM_138991 | BACE2    | chr21 | + |
| ASHG19A3A005907 | 0.017831 | 0.166331 | 6.272422 | up | coding | NM_138992 | BACE2    | chr21 | + |
| ASHG19A3A006038 | 0.015814 | 0.157775 | 6.141491 | up | coding | NM_145810 | CDCA7    | chr2  | + |
| ASHG19A3A006050 | 0.02337  | 0.189502 | 2.247825 | up | coding | NM_145895 | KLK12    | chr19 | - |
| ASHG19A3A006097 | 0.044889 | 0.252494 | 2.564595 | up | coding | NM_148918 | SHMT1    | chr17 | - |
| ASHG19A3A006107 | 0.014814 | 0.153113 | 2.787948 | up | coding | NM_003790 | TNFRSF25 | chr1  | - |

|                 |          |          |          |    |        |           |          |       |   |
|-----------------|----------|----------|----------|----|--------|-----------|----------|-------|---|
| ASHG19A3A006120 | 0.001215 | 0.054115 | 2.47657  | up | coding | NM_152286 | PNPLA7   | chr9  | - |
| ASHG19A3A006121 | 0.016499 | 0.160493 | 7.362182 | up | coding | NM_152296 | ATP1A3   | chr19 | - |
| ASHG19A3A006133 | 0.004097 | 0.088276 | 2.439167 | up | coding | NM_152398 | OCIAD2   | chr4  | - |
| ASHG19A3A006205 | 0.025011 | 0.194589 | 2.382274 | up | coding | NM_153023 | SPATA13  | chr13 | + |
| ASHG19A3A006209 | 0.013185 | 0.144355 | 3.054313 | up | coding | NM_153187 | SLC22A1  | chr6  | + |
| ASHG19A3A006215 | 0.008459 | 0.119591 | 2.027916 | up | coding | NM_153278 | SLC22A6  | chr11 | - |
| ASHG19A3A006230 | 0.021904 | 0.182965 | 2.326918 | up | coding | NM_153453 | VGLL2    | chr6  | + |
| ASHG19A3A006238 | 0.019614 | 0.174895 | 3.358312 | up | coding | NM_153636 | CPNE7    | chr16 | + |
| ASHG19A3A006241 | 0.017619 | 0.165563 | 2.203404 | up | coding | NM_153693 | HOXC6    | chr12 | + |
| ASHG19A3A006257 | 0.033649 | 0.221614 | 3.135752 | up | coding | NM_153824 | PYCR1    | chr17 | - |
| ASHG19A3A006278 | 0.006557 | 0.107381 | 2.064503 | up | coding | NM_170738 | MRPL11   | chr11 | - |
| ASHG19A3A006287 | 0.045548 | 0.253885 | 2.128122 | up | coding | NM_172027 | ABTB1    | chr3  | + |
| ASHG19A3A006352 | 0.039752 | 0.238034 | 2.957256 | up | coding | NM_173089 | CAPN3    | chr15 | + |
| ASHG19A3A006369 | 0.002908 | 0.078231 | 2.104941 | up | coding | NM_173204 | IL1F7    | chr2  | + |
| ASHG19A3A006398 | 0.012293 | 0.140003 | 2.013516 | up | coding | NM_173841 | IL1RN    | chr2  | + |
| ASHG19A3A006402 | 0.023409 | 0.189502 | 5.853781 | up | coding | NM_174881 | CRB3     | chr19 | + |
| ASHG19A3A006438 | 0.027689 | 0.203208 | 2.773149 | up | coding | NM_175849 | DNMT3B   | chr20 | + |
| ASHG19A3A006454 | 0.003814 | 0.086652 | 2.393847 | up | coding | NM_177526 | PPAP2C   | chr19 | - |
| ASHG19A3A006467 | 0.037998 | 0.233813 | 4.602328 | up | coding | NM_177973 | SULT2B1  | chr19 | + |
| ASHG19A3A006512 | 0.000338 | 0.03301  | 3.17873  | up | coding | NM_178818 | CMTM4    | chr16 | - |
| ASHG19A3A006548 | 0.031526 | 0.214448 | 2.242882 | up | coding | NM_181472 | CMTM7    | chr3  | + |
| ASHG19A3A006550 | 7.77E-05 | 0.023121 | 4.899088 | up | coding | NM_181492 | TCF20    | chr22 | - |
| ASHG19A3A006562 | 0.014634 | 0.152736 | 2.197804 | up | coding | NM_181641 | CKLF     | chr16 | + |
| ASHG19A3A006563 | 0.003193 | 0.081478 | 2.526129 | up | coding | NM_181642 | SPINT1   | chr15 | + |
| ASHG19A3A006566 | 0.019035 | 0.172094 | 3.542656 | up | coding | NM_181655 | C17orf58 | chr17 | - |
| ASHG19A3A006621 | 0.025004 | 0.194589 | 2.620154 | up | coding | NM_182685 | EFNA1    | chr1  | + |
| ASHG19A3A006637 | 0.003029 | 0.080124 | 3.251131 | up | coding | NM_182746 | MCM4     | chr8  | + |
| ASHG19A3A006650 | 0.028262 | 0.205575 | 2.596346 | up | coding | NM_182847 | ACCN4    | chr2  | + |
| ASHG19A3A006681 | 0.027116 | 0.201277 | 2.202531 | up | coding | NM_183246 | PHACTR3  | chr20 | + |
| ASHG19A3A006683 | 0.011981 | 0.138592 | 4.210996 | up | coding | NM_183356 | ASNS     | chr7  | - |

|                 |          |          |          |    |        |              |          |       |   |
|-----------------|----------|----------|----------|----|--------|--------------|----------|-------|---|
| ASHG19A3A006684 | 0.027316 | 0.201941 | 2.798765 | up | coding | NM_183360    | DTNB     | chr2  | - |
| ASHG19A3A006696 | 0.008641 | 0.120291 | 3.157446 | up | coding | NM_183425    | RBM38    | chr20 | + |
| ASHG19A3A006697 | 0.015542 | 0.156435 | 2.291895 | up | coding | NM_184085    | TRIM55   | chr8  | + |
| ASHG19A3A006712 | 0.002337 | 0.070865 | 3.685185 | up | coding | NM_194431    | RNASE4   | chr14 | + |
| ASHG19A3A006785 | 0.047145 | 0.258093 | 2.194922 | up | coding | NM_198383    | CACNA1G  | chr17 | + |
| ASHG19A3A006787 | 0.021042 | 0.180024 | 2.014628 | up | coding | NM_018896    | CACNA1G  | chr17 | + |
| ASHG19A3A006790 | 0.003127 | 0.080884 | 2.184738 | up | coding | NM_198433    | AURKA    | chr20 | - |
| ASHG19A3A006816 | 3.19E-05 | 0.016153 | 2.453158 | up | coding | NM_198845    | SIGLEC6  | chr19 | - |
| ASHG19A3A006832 | 0.001235 | 0.054115 | 2.120643 | up | coding | NM_198971    | HINFP    | chr11 | + |
| ASHG19A3A006842 | 0.042999 | 0.246622 | 2.125725 | up | coding | NM_199078    | CNNM3    | chr2  | + |
| ASHG19A3A006974 | 0.014172 | 0.150369 | 2.898422 | up | coding | NM_203464    | AK3L1    | chr1  | + |
| ASHG19A3A006984 | 0.002901 | 0.078231 | 2.702457 | up | coding | NM_205834    | LSR      | chr19 | + |
| ASHG19A3A006985 | 0.007182 | 0.111953 | 4.095625 | up | coding | NM_205835    | LSR      | chr19 | + |
| ASHG19A3A007032 | 0.00022  | 0.029361 | 2.695208 | up | coding | NM_207121    | FAM110A  | chr20 | + |
| ASHG19A3A007393 | 0.016014 | 0.158564 | 3.248468 | up | coding | NM_001779    | CD58     | chr1  | - |
| ASHG19A3A007985 | 0.031248 | 0.214234 | 2.778408 | up | coding | NM_181716    | CENPV    | chr17 | - |
| ASHG19A3A008003 | 0.03957  | 0.237338 | 3.184488 | up | coding | NM_178836    | PLD6     | chr17 | - |
| ASHG19A3A008023 | 0.027875 | 0.203809 | 2.817615 | up | coding | NM_004169    | SHMT1    | chr17 | - |
| ASHG19A3A008117 | 0.0019   | 0.063466 | 2.678473 | up | coding | NM_138463    | TLCD1    | chr17 | - |
| ASHG19A3A008118 | 0.005267 | 0.098632 | 3.420046 | up | coding | NM_001160407 | TLCD1    | chr17 | - |
| ASHG19A3A008121 | 2.78E-05 | 0.016153 | 4.067084 | up | coding | NM_144683    | DHRS13   | chr17 | - |
| ASHG19A3A008230 | 0.009961 | 0.127353 | 3.042349 | up | coding | NM_198836    | ACACA    | chr17 | - |
| ASHG19A3A008242 | 1.95E-09 | 3.67E-05 | 18.21404 | up | coding | NM_001130677 | C17orf96 | chr17 | - |
| ASHG19A3A008268 | 0.033779 | 0.222049 | 2.291819 | up | coding | NM_021724    | NR1D1    | chr17 | - |
| ASHG19A3A008279 | 0.007267 | 0.112538 | 7.637013 | up | coding | NM_032865    | TNS4     | chr17 | - |
| ASHG19A3A008333 | 0.035901 | 0.228021 | 2.543667 | up | coding | NM_002278    | KRT32    | chr17 | - |
| ASHG19A3A008417 | 0.032845 | 0.219108 | 2.008467 | up | coding | NM_198475    | FAM171A2 | chr17 | - |
| ASHG19A3A008448 | 0.000176 | 0.026643 | 2.217342 | up | coding | NM_199282    | ARHGAP27 | chr17 | - |
| ASHG19A3A008490 | 0.005555 | 0.100597 | 18.96959 | up | coding | NM_199262    | SP6      | chr17 | - |
| ASHG19A3A008503 | 0.002088 | 0.067209 | 2.05802  | up | coding | NM_002145    | HOXB2    | chr17 | - |

|                 |          |          |          |    |        |              |          |       |   |
|-----------------|----------|----------|----------|----|--------|--------------|----------|-------|---|
| ASHG19A3A008506 | 3.17E-05 | 0.016153 | 2.000614 | up | coding | NM_024015    | HOXB4    | chr17 | - |
| ASHG19A3A008512 | 0.007807 | 0.116887 | 8.286414 | up | coding | NM_024016    | HOXB8    | chr17 | - |
| ASHG19A3A008514 | 0.013841 | 0.148967 | 55.18008 | up | coding | NM_024017    | HOXB9    | chr17 | - |
| ASHG19A3A008668 | 0.000736 | 0.044848 | 3.400408 | up | coding | NM_032043    | BRIP1    | chr17 | - |
| ASHG19A3A008683 | 0.003955 | 0.08772  | 2.394317 | up | coding | NM_172000    | TEDDM1   | chr1  | - |
| ASHG19A3A008686 | 0.029004 | 0.208871 | 3.363411 | up | coding | NM_001915    | CYB561   | chr17 | - |
| ASHG19A3A008693 | 0.025082 | 0.194778 | 2.241868 | up | coding | NM_003077    | SMARCD2  | chr17 | - |
| ASHG19A3A008694 | 0.01666  | 0.161307 | 10.4873  | up | coding | NM_002928    | RGS16    | chr1  | - |
| ASHG19A3A008709 | 0.000126 | 0.026266 | 2.428412 | up | coding | NM_007215    | POLG2    | chr17 | - |
| ASHG19A3A008724 | 0.003015 | 0.079978 | 31.9848  | up | coding | NM_004655    | AXIN2    | chr17 | - |
| ASHG19A3A008777 | 0.002422 | 0.071184 | 2.191771 | up | coding | NM_000835    | GRIN2C   | chr17 | - |
| ASHG19A3A008782 | 0.038112 | 0.234    | 3.153017 | up | coding | NM_030630    | C17orf28 | chr17 | - |
| ASHG19A3A008797 | 0.021908 | 0.182965 | 2.781387 | up | coding | NM_001142643 | CASKIN2  | chr17 | - |
| ASHG19A3A008805 | 0.007545 | 0.11456  | 2.739214 | up | coding | NM_033452    | TRIM47   | chr17 | - |
| ASHG19A3A008858 | 0.008781 | 0.12054  | 2.077375 | up | coding | NM_020649    | CBX8     | chr17 | - |
| ASHG19A3A008905 | 0.036072 | 0.228108 | 3.348673 | up | coding | NM_006907    | PYCR1    | chr17 | - |
| ASHG19A3A008909 | 0.003887 | 0.086787 | 2.669128 | up | coding | NM_016286    | DCXR     | chr17 | - |
| ASHG19A3A008912 | 0.003265 | 0.082065 | 2.063448 | up | coding | NM_022156    | DUS1L    | chr17 | - |
| ASHG19A3A008913 | 0.014812 | 0.153113 | 2.775469 | up | coding | NM_004104    | FASN     | chr17 | - |
| ASHG19A3A008964 | 0.018572 | 0.170069 | 6.213954 | up | coding | NM_001100398 | RAP1GAP2 | chr17 | + |
| ASHG19A3A009026 | 0.006325 | 0.105194 | 2.771307 | up | coding | NM_201566    | SLC16A13 | chr17 | + |
| ASHG19A3A009031 | 0.005786 | 0.101967 | 2.462593 | up | coding | NM_203414    | C17orf81 | chr17 | + |
| ASHG19A3A009035 | 0.026411 | 0.198713 | 5.761616 | up | coding | NM_001970    | EIF5A    | chr17 | + |
| ASHG19A3A009037 | 0.000654 | 0.042495 | 2.098742 | up | coding | NM_001143762 | EIF5A    | chr17 | + |
| ASHG19A3A009042 | 0.007903 | 0.117056 | 3.426658 | up | coding | NM_003985    | TNK1     | chr17 | + |
| ASHG19A3A009050 | 0.020411 | 0.177218 | 2.727787 | up | coding | NM_000747    | CHRNA1   | chr17 | + |
| ASHG19A3A009191 | 0.00147  | 0.058292 | 2.712458 | up | coding | NM_001994    | F13B     | chr1  | - |
| ASHG19A3A009238 | 0.042455 | 0.244962 | 2.865713 | up | coding | NM_001031806 | ALDH3A2  | chr17 | + |
| ASHG19A3A009298 | 0.000743 | 0.045021 | 5.254494 | up | coding | NM_014573    | TMEM97   | chr17 | + |
| ASHG19A3A009353 | 0.001583 | 0.059794 | 2.577069 | up | coding | NM_024857    | ATAD5    | chr17 | + |

|                 |          |          |          |    |        |              |           |       |   |
|-----------------|----------|----------|----------|----|--------|--------------|-----------|-------|---|
| ASHG19A3A009369 | 0.013861 | 0.148967 | 3.494123 | up | coding | NM_032932    | RAB11FIP4 | chr17 | + |
| ASHG19A3A009380 | 0.000458 | 0.037144 | 2.860989 | up | coding | NM_003885    | CDK5R1    | chr17 | + |
| ASHG19A3A009424 | 0.014242 | 0.150593 | 2.09909  | up | coding | NM_004773    | ZNHIT3    | chr17 | + |
| ASHG19A3A009429 | 0.001247 | 0.054115 | 2.42097  | up | coding | NM_024864    | MRM1      | chr17 | + |
| ASHG19A3A009688 | 2.34E-05 | 0.016153 | 21.59135 | up | coding | NM_138281    | DLX4      | chr17 | + |
| ASHG19A3A009747 | 0.006811 | 0.109609 | 3.095683 | up | coding | NM_005486    | TOM1L1    | chr17 | + |
| ASHG19A3A009756 | 0.047973 | 0.260909 | 2.729288 | up | coding | NM_080588    | PTPN7     | chr1  | - |
| ASHG19A3A009761 | 0.001188 | 0.054008 | 3.383994 | up | coding | NM_170721    | MSI2      | chr17 | + |
| ASHG19A3A009765 | 0.008748 | 0.12054  | 2.710038 | up | coding | NM_138962    | MSI2      | chr17 | + |
| ASHG19A3A009842 | 0.010411 | 0.129921 | 2.680414 | up | coding | NM_181671    | PITPNC1   | chr17 | + |
| ASHG19A3A009881 | 0.008208 | 0.118181 | 3.051551 | up | coding | NM_000346    | SOX9      | chr17 | + |
| ASHG19A3A009913 | 0.025986 | 0.197961 | 3.627967 | up | coding | NM_004252    | SLC9A3R1  | chr17 | + |
| ASHG19A3A009934 | 0.000122 | 0.025865 | 3.57267  | up | coding | NM_207346    | TSEN54    | chr17 | + |
| ASHG19A3A009935 | 0.008788 | 0.12054  | 12.58687 | up | coding | NM_001015002 | LLGL2     | chr17 | + |
| ASHG19A3A010025 | 0.000725 | 0.044771 | 19.11646 | up | coding | NM_005189    | CBX2      | chr17 | + |
| ASHG19A3A010047 | 0.018586 | 0.170069 | 2.05657  | up | coding | NM_001144888 | BAIAP2    | chr17 | + |
| ASHG19A3A010083 | 0.012994 | 0.143604 | 4.877258 | up | coding | NM_207459    | TEX19     | chr17 | + |
| ASHG19A3A010276 | 0.029208 | 0.209378 | 2.317701 | up | coding | NM_001142467 | HES4      | chr1  | - |
| ASHG19A3A010278 | 0.001195 | 0.054008 | 2.777596 | up | coding | NM_021795    | ELK4      | chr1  | - |
| ASHG19A3A010409 | 0.044636 | 0.251586 | 3.026144 | up | coding | NM_001025100 | MBP       | chr18 | - |
| ASHG19A3A010441 | 0.038422 | 0.234998 | 2.655991 | up | coding | NM_003244    | TGIF1     | chr18 | + |
| ASHG19A3A010556 | 0.023436 | 0.189502 | 4.612431 | up | coding | NM_005640    | TAF4B     | chr18 | + |
| ASHG19A3A010604 | 0.008638 | 0.120291 | 6.338059 | up | coding | NM_017947    | MOCOS     | chr18 | + |
| ASHG19A3A010676 | 0.000267 | 0.031138 | 76.43713 | up | coding | NM_004852    | ONECUT2   | chr18 | + |
| ASHG19A3A010683 | 0.00181  | 0.062815 | 2.363734 | up | coding | NM_001144970 | NEDD4L    | chr18 | + |
| ASHG19A3A010711 | 0.010955 | 0.133053 | 2.167236 | up | coding | NM_001127641 | LAMB3     | chr1  | - |
| ASHG19A3A010713 | 0.000771 | 0.045376 | 2.164636 | up | coding | NM_080474    | SERPINB12 | chr18 | + |
| ASHG19A3A010766 | 0.001892 | 0.063466 | 2.978437 | up | coding | NM_171999    | SALL3     | chr18 | + |
| ASHG19A3A010837 | 0.04792  | 0.260742 | 2.15344  | up | coding | NM_020695    | REXO1     | chr19 | - |
| ASHG19A3A010843 | 0.048446 | 0.261704 | 2.59079  | up | coding | NM_199054    | MKNK2     | chr19 | - |

|                 |          |          |          |    |        |              |          |       |   |
|-----------------|----------|----------|----------|----|--------|--------------|----------|-------|---|
| ASHG19A3A010850 | 0.003854 | 0.086652 | 2.305418 | up | coding | NM_198532    | C19orf35 | chr19 | - |
| ASHG19A3A010852 | 0.003787 | 0.086533 | 2.124623 | up | coding | NM_016199    | LSM7     | chr19 | - |
| ASHG19A3A010900 | 0.035473 | 0.226755 | 3.962981 | up | coding | NM_032108    | SEMA6B   | chr19 | - |
| ASHG19A3A010918 | 0.039074 | 0.236631 | 3.356022 | up | coding | NM_001134316 | PRR22    | chr19 | - |
| ASHG19A3A011048 | 0.008625 | 0.120291 | 2.234912 | up | coding | NM_020812    | DOCK6    | chr19 | - |
| ASHG19A3A011054 | 0.025606 | 0.196631 | 3.108404 | up | coding | NM_001035223 | RGL3     | chr19 | - |
| ASHG19A3A011077 | 0.04181  | 0.243388 | 2.504723 | up | coding | NM_001080821 | ZNF799   | chr19 | - |
| ASHG19A3A011103 | 0.004605 | 0.093019 | 3.088265 | up | coding | NM_006563    | KLF1     | chr19 | - |
| ASHG19A3A011184 | 0.007987 | 0.117056 | 3.583221 | up | coding | NM_054113    | CIB3     | chr19 | - |
| ASHG19A3A011248 | 0.000709 | 0.04432  | 2.467482 | up | coding | NM_176880    | NR2C2AP  | chr19 | - |
| ASHG19A3A011255 | 0.033903 | 0.22223  | 3.393323 | up | coding | NM_025245    | PBX4     | chr19 | - |
| ASHG19A3A011256 | 0.025135 | 0.194874 | 3.432663 | up | coding | NM_004720    | LPAR2    | chr19 | - |
| ASHG19A3A011323 | 0.025548 | 0.196375 | 38.37594 | up | coding | NM_004364    | CEBPA    | chr19 | - |
| ASHG19A3A011352 | 0.003539 | 0.083557 | 8.922809 | up | coding | NM_207392    | KRTDAP   | chr19 | - |
| ASHG19A3A011355 | 5.82E-05 | 0.02082  | 35.10731 | up | coding | NM_001126058 | DMKN     | chr19 | - |
| ASHG19A3A011432 | 0.001196 | 0.054008 | 2.18452  | up | coding | NM_001145901 | SARS2    | chr19 | - |
| ASHG19A3A011449 | 0.000166 | 0.026643 | 2.270461 | up | coding | NM_001436    | FBL      | chr19 | - |
| ASHG19A3A011482 | 0.000121 | 0.025865 | 2.961698 | up | coding | NM_020158    | EXOSC5   | chr19 | - |
| ASHG19A3A011497 | 0.036129 | 0.228317 | 2.671428 | up | coding | NM_002088    | GRIK5    | chr19 | - |
| ASHG19A3A011502 | 0.021688 | 0.182455 | 3.413022 | up | coding | NM_002573    | PAFAH1B3 | chr19 | - |
| ASHG19A3A011503 | 0.014269 | 0.150789 | 2.530645 | up | coding | NM_032488    | CNFN     | chr19 | - |
| ASHG19A3A011566 | 0.015251 | 0.154986 | 6.368606 | up | coding | NM_145288    | ZNF296   | chr19 | - |
| ASHG19A3A011569 | 0.039999 | 0.238412 | 2.421044 | up | coding | NM_198478    | NKPD1    | chr19 | - |
| ASHG19A3A011592 | 0.043977 | 0.249599 | 2.197571 | up | coding | NM_001080469 | FBXO46   | chr19 | - |
| ASHG19A3A011642 | 0.043251 | 0.247577 | 2.033921 | up | coding | NM_000234    | LIG1     | chr19 | - |
| ASHG19A3A011646 | 0.011302 | 0.135345 | 3.417103 | up | coding | NM_144577    | CCDC114  | chr19 | - |
| ASHG19A3A011652 | 0.006477 | 0.106393 | 15.62536 | up | coding | NM_001080434 | LMTK3    | chr19 | - |
| ASHG19A3A011656 | 0.004592 | 0.093019 | 3.058609 | up | coding | NM_001352    | DBP      | chr19 | - |
| ASHG19A3A011665 | 0.000461 | 0.037144 | 16.9873  | up | coding | NM_000148    | FUT1     | chr19 | - |
| ASHG19A3A011704 | 0.008649 | 0.120291 | 3.77811  | up | coding | NM_172374    | IL4I1    | chr19 | - |

|                 |          |          |          |    |        |              |          |       |   |
|-----------------|----------|----------|----------|----|--------|--------------|----------|-------|---|
| ASHG19A3A011711 | 0.026092 | 0.198289 | 2.0988   | up | coding | NM_004977    | KCNC3    | chr19 | - |
| ASHG19A3A011713 | 0.000835 | 0.047092 | 7.682115 | up | coding | NM_138411    | FAM71E1  | chr19 | - |
| ASHG19A3A011731 | 0.042312 | 0.244731 | 2.276895 | up | coding | NM_001012964 | KLK6     | chr19 | - |
| ASHG19A3A011733 | 0.000176 | 0.026643 | 3.441728 | up | coding | NM_144505    | KLK8     | chr19 | - |
| ASHG19A3A011745 | 0.00076  | 0.045264 | 2.213561 | up | coding | NM_145232    | CTU1     | chr19 | - |
| ASHG19A3A011801 | 0.031532 | 0.214448 | 2.052346 | up | coding | NM_001136038 | ZNF415   | chr19 | - |
| ASHG19A3A011864 | 3.07E-05 | 0.016153 | 27.94018 | up | coding | NM_000363    | TNNI3    | chr19 | - |
| ASHG19A3A011865 | 0.004201 | 0.089158 | 26.72829 | up | coding | NM_178837    | C19orf51 | chr19 | - |
| ASHG19A3A011886 | 0.002017 | 0.066013 | 4.303435 | up | coding | NM_176820    | NLRP9    | chr19 | - |
| ASHG19A3A011887 | 0.004097 | 0.088276 | 6.877076 | up | coding | NM_145007    | NLRP11   | chr19 | - |
| ASHG19A3A011920 | 0.014917 | 0.153761 | 2.461956 | up | coding | NM_024762    | ZNF552   | chr19 | - |
| ASHG19A3A011943 | 0.00048  | 0.037788 | 5.916534 | up | coding | NM_198458    | ZNF497   | chr19 | - |
| ASHG19A3A011948 | 0.000515 | 0.03796  | 3.305185 | up | coding | NM_003433    | ZNF132   | chr19 | - |
| ASHG19A3A011949 | 0.000164 | 0.026643 | 4.622308 | up | coding | NM_012254    | SLC27A5  | chr19 | - |
| ASHG19A3A011966 | 0.006072 | 0.103718 | 2.003761 | up | coding | NM_001728    | BSG      | chr19 | + |
| ASHG19A3A012002 | 0.04589  | 0.254701 | 3.440966 | up | coding | NM_138393    | REEP6    | chr19 | + |
| ASHG19A3A012070 | 0.042202 | 0.244591 | 2.032131 | up | coding | NM_005483    | CHAF1A   | chr19 | + |
| ASHG19A3A012138 | 0.003193 | 0.081478 | 6.293976 | up | coding | NM_001127396 | STXBP2   | chr19 | + |
| ASHG19A3A012218 | 0.000267 | 0.031138 | 2.418781 | up | coding | NM_001136482 | C19orf38 | chr19 | + |
| ASHG19A3A012319 | 0.005166 | 0.097577 | 2.080333 | up | coding | NM_012377    | OR7C2    | chr19 | + |
| ASHG19A3A012359 | 0.016064 | 0.158574 | 5.792704 | up | coding | NM_024074    | TMEM38A  | chr19 | + |
| ASHG19A3A012390 | 0.024107 | 0.191703 | 3.391846 | up | coding | NM_198552    | FAM89A   | chr1  | - |
| ASHG19A3A012396 | 0.003855 | 0.086652 | 2.91622  | up | coding | NM_006332    | IFI30    | chr19 | + |
| ASHG19A3A012503 | 0.035636 | 0.227147 | 2.933718 | up | coding | NM_001105570 | NUDT19   | chr19 | + |
| ASHG19A3A012515 | 0.020692 | 0.178453 | 2.561637 | up | coding | NM_001806    | CEBPG    | chr19 | + |
| ASHG19A3A012525 | 9.61E-05 | 0.023735 | 4.134269 | up | coding | NM_032346    | PDCD2L   | chr19 | + |
| ASHG19A3A012581 | 0.008027 | 0.117056 | 2.031148 | up | coding | NM_052948    | ARHGAP33 | chr19 | + |
| ASHG19A3A012629 | 0.035744 | 0.227486 | 43.96626 | up | coding | NM_021102    | SPINT2   | chr19 | + |
| ASHG19A3A012630 | 0.004373 | 0.090993 | 12.68689 | up | coding | NM_033520    | C19orf33 | chr19 | + |
| ASHG19A3A012633 | 0.003885 | 0.086787 | 2.156815 | up | coding | NM_021185    | CATSPERG | chr19 | + |



|                 |          |          |          |    |        |              |          |       |   |
|-----------------|----------|----------|----------|----|--------|--------------|----------|-------|---|
| ASHG19A3A012727 | 0.020016 | 0.175921 | 4.592873 | up | coding | NM_004706    | ARHGEF1  | chr19 | + |
| ASHG19A3A012787 | 0.007506 | 0.114274 | 2.746104 | up | coding | NM_005581    | BCAM     | chr19 | + |
| ASHG19A3A012808 | 0.015827 | 0.157775 | 12.68809 | up | coding | NM_177417    | KLC3     | chr19 | + |
| ASHG19A3A012848 | 0.048187 | 0.261212 | 2.044786 | up | coding | NM_015710    | GLTSCR2  | chr19 | + |
| ASHG19A3A012857 | 0.016422 | 0.159902 | 3.473666 | up | coding | NM_012451    | SYNGR4   | chr19 | + |
| ASHG19A3A012858 | 0.022315 | 0.184784 | 9.832042 | up | coding | NM_000836    | GRIN2D   | chr19 | + |
| ASHG19A3A012872 | 0.00235  | 0.070872 | 2.621241 | up | coding | NM_014330    | PPP1R15A | chr19 | + |
| ASHG19A3A012875 | 0.008567 | 0.120291 | 2.862498 | up | coding | NM_014475    | DHDH     | chr19 | + |
| ASHG19A3A012885 | 0.000348 | 0.033433 | 6.327558 | up | coding | NM_003660    | PPFIA3   | chr19 | + |
| ASHG19A3A012890 | 0.010662 | 0.131368 | 2.043294 | up | coding | NM_153329    | ALDH16A1 | chr19 | + |
| ASHG19A3A012921 | 0.000738 | 0.044848 | 2.237261 | up | coding | NM_002691    | POLD1    | chr19 | + |
| ASHG19A3A012929 | 0.004562 | 0.093019 | 2.363337 | up | coding | NM_033068    | ACPT     | chr19 | + |
| ASHG19A3A012997 | 0.000835 | 0.047092 | 2.495545 | up | coding | NM_002739    | PRKCG    | chr19 | + |
| ASHG19A3A013123 | 0.006091 | 0.103718 | 2.015227 | up | coding | NM_001015878 | AURKC    | chr19 | + |
| ASHG19A3A013142 | 0.010934 | 0.133053 | 2.187509 | up | coding | NM_138347    | ZNF551   | chr19 | + |
| ASHG19A3A013182 | 0.007205 | 0.112126 | 95.67187 | up | coding | NM_001077710 | FAM110C  | chr2  | - |
| ASHG19A3A013321 | 0.021371 | 0.181535 | 2.573368 | up | coding | NM_001142286 | SMC6     | chr2  | - |
| ASHG19A3A013341 | 0.040599 | 0.239899 | 2.223682 | up | coding | NM_002997    | SDC1     | chr2  | - |
| ASHG19A3A013413 | 0.002263 | 0.069865 | 3.537219 | up | coding | NM_006569    | CGREF1   | chr2  | - |
| ASHG19A3A013420 | 0.003043 | 0.080155 | 2.870952 | up | coding | NM_021095    | SLC5A6   | chr2  | - |
| ASHG19A3A013425 | 0.009181 | 0.122863 | 2.868805 | up | coding | NM_003353    | UCN      | chr2  | - |
| ASHG19A3A013430 | 0.028649 | 0.207188 | 2.001202 | up | coding | NM_177983    | PPM1G    | chr2  | - |
| ASHG19A3A013502 | 0.019116 | 0.172489 | 2.575611 | up | coding | NM_022366    | TFB2M    | chr1  | - |
| ASHG19A3A013561 | 0.016513 | 0.16051  | 2.194835 | up | coding | NM_001083953 | THADA    | chr2  | - |
| ASHG19A3A013566 | 0.002171 | 0.068508 | 2.426956 | up | coding | NM_133259    | LRPPRC   | chr2  | - |
| ASHG19A3A013583 | 0.036988 | 0.231032 | 2.436165 | up | coding | NM_153213    | ARHGEF19 | chr1  | - |
| ASHG19A3A013605 | 0.008914 | 0.121637 | 2.777948 | up | coding | NM_020394    | ZNF695   | chr1  | - |
| ASHG19A3A013653 | 0.002865 | 0.077844 | 2.879892 | up | coding | NM_002453    | MTIF2    | chr2  | - |
| ASHG19A3A013816 | 0.001253 | 0.054115 | 2.323362 | up | coding | NM_032822    | FAM136A  | chr2  | - |
| ASHG19A3A013818 | 0.007311 | 0.112726 | 2.166321 | up | coding | NM_001099691 | TGFA     | chr2  | - |

|                 |          |          |          |    |        |              |          |      |   |
|-----------------|----------|----------|----------|----|--------|--------------|----------|------|---|
| ASHG19A3A013840 | 0.000329 | 0.0328   | 8.049524 | up | coding | NM_001080410 | FBXO41   | chr2 | - |
| ASHG19A3A013863 | 0.000386 | 0.034349 | 7.311338 | up | coding | NM_001015055 | RTKN     | chr2 | - |
| ASHG19A3A013940 | 0.032019 | 0.2164   | 2.077028 | up | coding | NM_001747    | CAPG     | chr2 | - |
| ASHG19A3A014047 | 0.003101 | 0.08044  | 8.214445 | up | coding | NM_004418    | DUSP2    | chr2 | - |
| ASHG19A3A014052 | 0.000826 | 0.046841 | 2.138661 | up | coding | NM_198317    | KLHL17   | chr1 | + |
| ASHG19A3A014090 | 0.002208 | 0.06942  | 3.100131 | up | coding | NM_025244    | TSGA10   | chr2 | - |
| ASHG19A3A014205 | 0.01244  | 0.140622 | 2.521114 | up | coding | NM_022662    | ANAPC1   | chr2 | - |
| ASHG19A3A014258 | 0.005995 | 0.103254 | 2.817858 | up | coding | NM_182528    | C1QL2    | chr2 | - |
| ASHG19A3A014309 | 0.012935 | 0.143381 | 2.463479 | up | coding | NM_031445    | AMMECR1L | chr2 | - |
| ASHG19A3A014342 | 0.000321 | 0.032699 | 2.424633 | up | coding | NM_022834    | VWA1     | chr1 | + |
| ASHG19A3A014577 | 0.004569 | 0.093019 | 2.383555 | up | coding | NM_002744    | PRKCZ    | chr1 | + |
| ASHG19A3A014614 | 0.000104 | 0.024093 | 3.14849  | up | coding | NM_024770    | METTL8   | chr2 | - |
| ASHG19A3A014746 | 0.011094 | 0.133841 | 67.53662 | up | coding | NM_014448    | ARHGEF16 | chr1 | + |
| ASHG19A3A014925 | 0.018006 | 0.167286 | 2.392801 | up | coding | NM_001127395 | FAM119A  | chr2 | - |
| ASHG19A3A015005 | 0.007957 | 0.117056 | 2.846717 | up | coding | NM_020935    | USP37    | chr2 | - |
| ASHG19A3A015024 | 0.012805 | 0.142578 | 2.690127 | up | coding | NM_006000    | TUBA4A   | chr2 | - |
| ASHG19A3A015136 | 0.004073 | 0.088276 | 3.333767 | up | coding | NM_001166217 | MSL3L2   | chr2 | - |
| ASHG19A3A015160 | 0.026017 | 0.197961 | 2.4782   | up | coding | NM_022449    | RAB17    | chr2 | - |
| ASHG19A3A015166 | 0.00231  | 0.070288 | 12.68906 | up | coding | NM_001142853 | HES6     | chr2 | - |
| ASHG19A3A015211 | 0.000512 | 0.03796  | 3.928911 | up | coding | NM_015148    | PASK     | chr2 | - |
| ASHG19A3A015291 | 0.00187  | 0.06346  | 2.249087 | up | coding | NM_032315    | SLC25A33 | chr1 | + |
| ASHG19A3A015303 | 0.024042 | 0.191703 | 3.233406 | up | coding | NM_198182    | GRHL1    | chr2 | + |
| ASHG19A3A015311 | 5.52E-05 | 0.0208   | 2.22772  | up | coding | NM_002149    | HPCAL1   | chr2 | + |
| ASHG19A3A015317 | 0.000464 | 0.037144 | 2.095943 | up | coding | NM_001130924 | TMEM201  | chr1 | + |
| ASHG19A3A015433 | 0.002105 | 0.067384 | 5.421169 | up | coding | NM_000221    | KHK      | chr2 | + |
| ASHG19A3A015447 | 0.023306 | 0.189341 | 12.46447 | up | coding | NM_001168364 | KRTCAP3  | chr2 | + |
| ASHG19A3A015463 | 0.00092  | 0.04953  | 2.03663  | up | coding | NM_002709    | PPP1CB   | chr2 | + |
| ASHG19A3A015467 | 0.023256 | 0.189101 | 2.677432 | up | coding | NM_015131    | WDR43    | chr2 | + |
| ASHG19A3A015627 | 0.03985  | 0.238303 | 95.23085 | up | coding | NM_002354    | EPCAM    | chr2 | + |
| ASHG19A3A015676 | 0.02573  | 0.19721  | 2.169268 | up | coding | NM_001136027 | VRK2     | chr2 | + |

|                 |          |          |          |    |        |              |          |       |   |
|-----------------|----------|----------|----------|----|--------|--------------|----------|-------|---|
| ASHG19A3A015719 | 0.002399 | 0.070943 | 28.5536  | up | coding | NM_014562    | OTX1     | chr2  | + |
| ASHG19A3A015730 | 0.022785 | 0.18681  | 3.88971  | up | coding | NM_014181    | HSPC159  | chr2  | + |
| ASHG19A3A015819 | 0.023629 | 0.190032 | 2.634496 | up | coding | NM_003124    | SPR      | chr2  | + |
| ASHG19A3A015946 | 0.022908 | 0.187307 | 2.954955 | up | coding | NM_144563    | RPIA     | chr2  | + |
| ASHG19A3A016040 | 0.041003 | 0.240929 | 2.267598 | up | coding | NM_145196    | LIPT1    | chr2  | + |
| ASHG19A3A016178 | 0.011965 | 0.138585 | 9.717064 | up | coding | NM_006538    | BCL2L11  | chr2  | + |
| ASHG19A3A016194 | 0.022796 | 0.18681  | 11.872   | up | coding | NM_006343    | MERTK    | chr2  | + |
| ASHG19A3A016222 | 0.046315 | 0.255817 | 4.819178 | up | coding | NM_012455    | PSD4     | chr2  | + |
| ASHG19A3A016372 | 0.032906 | 0.21918  | 3.071614 | up | coding | NM_052929    | FHAD1    | chr1  | + |
| ASHG19A3A016534 | 0.005619 | 0.100699 | 8.868193 | up | coding | NM_012198    | GCA      | chr2  | + |
| ASHG19A3A016553 | 0.033656 | 0.221614 | 3.898261 | up | coding | NM_203463    | LASS6    | chr2  | + |
| ASHG19A3A016577 | 0.003649 | 0.084617 | 188.0127 | up | coding | NM_001003845 | SP5      | chr2  | + |
| ASHG19A3A016581 | 0.006966 | 0.110984 | 10.10518 | up | coding | NM_013445    | GAD1     | chr2  | + |
| ASHG19A3A016582 | 0.015352 | 0.155381 | 4.651753 | up | coding | NM_000817    | GAD1     | chr2  | + |
| ASHG19A3A016608 | 0.006115 | 0.10388  | 8.79811  | up | coding | NM_031942    | CDCA7    | chr2  | + |
| ASHG19A3A016702 | 9.55E-05 | 0.023735 | 2.006139 | up | coding | NM_001144999 | ITGAV    | chr2  | + |
| ASHG19A3A016758 | 0.006802 | 0.109582 | 3.735166 | up | coding | NM_001080539 | CCDC150  | chr2  | + |
| ASHG19A3A016767 | 0.001862 | 0.063402 | 3.368806 | up | coding | NM_138395    | MARS2    | chr2  | + |
| ASHG19A3A016991 | 0.003523 | 0.083557 | 23.26102 | up | coding | NM_025216    | WNT10A   | chr2  | + |
| ASHG19A3A016997 | 0.02751  | 0.202466 | 2.01491  | up | coding | NM_016233    | PADI3    | chr1  | + |
| ASHG19A3A017172 | 3.02E-05 | 0.016153 | 2.102002 | up | coding | NM_016510    | SCLY     | chr2  | + |
| ASHG19A3A017218 | 0.005191 | 0.097959 | 2.746842 | up | coding | NM_032329    | ING5     | chr2  | + |
| ASHG19A3A017231 | 0.021319 | 0.181418 | 2.711017 | up | coding | NM_153269    | C20orf96 | chr20 | - |
| ASHG19A3A017247 | 0.006083 | 0.103718 | 3.525788 | up | coding | NM_018354    | C20orf46 | chr20 | - |
| ASHG19A3A017332 | 0.012603 | 0.141741 | 14.47556 | up | coding | NM_017671    | FERMT1   | chr20 | - |
| ASHG19A3A017402 | 0.017407 | 0.164752 | 49.21108 | up | coding | NM_021220    | OVOL2    | chr20 | - |
| ASHG19A3A017551 | 0.002008 | 0.065872 | 3.291785 | up | coding | NM_002657    | PLAGL2   | chr20 | - |
| ASHG19A3A017578 | 0.004425 | 0.091547 | 2.69171  | up | coding | NM_003908    | EIF2S2   | chr20 | - |
| ASHG19A3A017647 | 4.92E-05 | 0.019284 | 2.083075 | up | coding | NM_014657    | KIAA0406 | chr20 | - |
| ASHG19A3A017857 | 0.00468  | 0.093255 | 2.681304 | up | coding | NM_016045    | SLMO2    | chr20 | - |

|                 |          |          |          |    |        |              |           |       |   |
|-----------------|----------|----------|----------|----|--------|--------------|-----------|-------|---|
| ASHG19A3A017900 | 0.038257 | 0.234294 | 2.324991 | up | coding | NM_080797    | DIDO1     | chr20 | - |
| ASHG19A3A017952 | 0.008608 | 0.120291 | 4.011892 | up | coding | NM_021158    | TRIB3     | chr20 | + |
| ASHG19A3A017953 | 0.010733 | 0.131781 | 2.270841 | up | coding | NM_031229    | RBCK1     | chr20 | + |
| ASHG19A3A017988 | 0.00142  | 0.057151 | 2.537431 | up | coding | NM_030811    | MRPS26    | chr20 | + |
| ASHG19A3A018038 | 0.000417 | 0.034737 | 2.939923 | up | coding | NM_001136204 | RCC2      | chr1  | - |
| ASHG19A3A018100 | 0.014808 | 0.153113 | 2.719066 | up | coding | NM_020689    | SLC24A3   | chr20 | + |
| ASHG19A3A018105 | 0.001696 | 0.060953 | 2.037217 | up | coding | NM_181527    | NAA20     | chr20 | + |
| ASHG19A3A018157 | 0.048048 | 0.260925 | 3.321189 | up | coding | NM_021067    | GINS1     | chr20 | + |
| ASHG19A3A018228 | 0.000488 | 0.037875 | 3.274554 | up | coding | NM_080825    | C20orf144 | chr20 | + |
| ASHG19A3A018239 | 0.009679 | 0.12579  | 2.206432 | up | coding | NM_004455    | EXTL1     | chr1  | + |
| ASHG19A3A018270 | 0.009069 | 0.122347 | 2.906439 | up | coding | NM_012156    | EPB41L1   | chr20 | + |
| ASHG19A3A018271 | 0.01721  | 0.164351 | 2.919131 | up | coding | NM_018715    | RCC2      | chr1  | - |
| ASHG19A3A018278 | 0.041327 | 0.241772 | 2.168374 | up | coding | NM_021809    | TGIF2     | chr20 | + |
| ASHG19A3A018357 | 0.004198 | 0.089158 | 4.486085 | up | coding | NM_001124756 | PABPC1L   | chr20 | + |
| ASHG19A3A018359 | 0.020966 | 0.179877 | 2.295318 | up | coding | NM_006282    | STK4      | chr20 | + |
| ASHG19A3A018371 | 0.004438 | 0.091547 | 4.138139 | up | coding | NM_001048224 | DBNDD2    | chr20 | + |
| ASHG19A3A018382 | 0.013214 | 0.144592 | 2.947905 | up | coding | NM_181802    | UBE2C     | chr20 | + |
| ASHG19A3A018383 | 0.03068  | 0.213149 | 2.602952 | up | coding | NM_181799    | UBE2C     | chr20 | + |
| ASHG19A3A018525 | 0.008042 | 0.117056 | 58.06567 | up | coding | NM_006142    | SFN       | chr1  | + |
| ASHG19A3A018545 | 0.003768 | 0.086392 | 2.007035 | up | coding | NM_006600    | NUDC      | chr1  | + |
| ASHG19A3A018546 | 4.67E-05 | 0.019118 | 23.9044  | up | coding | NM_016354    | SLCO4A1   | chr20 | + |
| ASHG19A3A018549 | 0.002372 | 0.07092  | 2.318395 | up | coding | NM_018270    | C20orf20  | chr20 | + |
| ASHG19A3A018554 | 0.004117 | 0.088392 | 44.7285  | up | coding | NM_001853    | COL9A3    | chr20 | + |
| ASHG19A3A018559 | 0.026229 | 0.198323 | 6.006533 | up | coding | NM_022082    | SLC17A9   | chr20 | + |
| ASHG19A3A018584 | 0.000401 | 0.034548 | 4.726331 | up | coding | NM_017806    | LIME1     | chr20 | + |
| ASHG19A3A018605 | 0.030667 | 0.213149 | 2.042447 | up | coding | NM_018257    | PCMTD2    | chr20 | + |
| ASHG19A3A018628 | 0.000421 | 0.034859 | 10.14971 | up | coding | NM_032872    | SYTL1     | chr1  | + |
| ASHG19A3A018637 | 0.001128 | 0.053125 | 2.261045 | up | coding | NM_005281    | GPR3      | chr1  | + |
| ASHG19A3A018666 | 4.08E-07 | 0.003088 | 2.049503 | up | coding | NM_002772    | TMPRSS15  | chr21 | - |
| ASHG19A3A018786 | 0.003835 | 0.086652 | 2.399961 | up | coding | NM_018944    | C21orf45  | chr21 | - |

|                 |          |          |          |    |        |              |           |       |   |
|-----------------|----------|----------|----------|----|--------|--------------|-----------|-------|---|
| ASHG19A3A018790 | 0.014058 | 0.150337 | 51.66965 | up | coding | NM_014474    | SMPDL3B   | chr1  | + |
| ASHG19A3A018794 | 0.020811 | 0.179035 | 2.146742 | up | coding | NM_021254    | C21orf59  | chr21 | - |
| ASHG19A3A018815 | 0.032269 | 0.216971 | 2.545243 | up | coding | NM_000819    | GART      | chr21 | - |
| ASHG19A3A018904 | 0.040663 | 0.240205 | 4.824529 | up | coding | NM_001269    | RCC1      | chr1  | + |
| ASHG19A3A019008 | 0.01768  | 0.16577  | 2.244104 | up | coding | NM_194255    | SLC19A1   | chr21 | - |
| ASHG19A3A019160 | 0.039918 | 0.238303 | 5.328999 | up | coding | NM_058187    | C21orf63  | chr21 | + |
| ASHG19A3A019294 | 0.00037  | 0.034338 | 2.00195  | up | coding | NM_173568    | UMODL1    | chr21 | + |
| ASHG19A3A019305 | 0.011673 | 0.137222 | 4.366991 | up | coding | NM_018964    | SLC37A1   | chr21 | + |
| ASHG19A3A019369 | 0.000497 | 0.037875 | 2.203537 | up | coding | NM_130444    | COL18A1   | chr21 | + |
| ASHG19A3A019485 | 0.000111 | 0.024541 | 15.17223 | up | coding | NM_023004    | RTN4R     | chr22 | - |
| ASHG19A3A019515 | 0.011875 | 0.138208 | 2.006448 | up | coding | NM_030573    | THAP7     | chr22 | - |
| ASHG19A3A019532 | 4.61E-05 | 0.019118 | 3.542489 | up | coding | NM_001017964 | YDJC      | chr22 | - |
| ASHG19A3A019550 | 0.048999 | 0.262507 | 23.23653 | up | coding | NM_006115    | PRAME     | chr22 | - |
| ASHG19A3A019645 | 0.007412 | 0.113562 | 2.290305 | up | coding | NM_007194    | CHEK2     | chr22 | - |
| ASHG19A3A019654 | 0.040538 | 0.239831 | 2.091692 | up | coding | NM_001007279 | RASL10A   | chr22 | - |
| ASHG19A3A019659 | 0.021536 | 0.182164 | 2.06896  | up | coding | NM_003634    | NIPSNAP1  | chr22 | - |
| ASHG19A3A019707 | 0.001166 | 0.053691 | 2.434496 | up | coding | NM_173566    | C22orf30  | chr22 | - |
| ASHG19A3A019829 | 0.038532 | 0.235108 | 3.090514 | up | coding | NM_032884    | C1orf94   | chr1  | + |
| ASHG19A3A019901 | 0.02582  | 0.197501 | 2.772412 | up | coding | NM_173467    | MCAT      | chr22 | - |
| ASHG19A3A019973 | 0.005479 | 0.100265 | 2.00775  | up | coding | NM_015166    | MLC1      | chr22 | - |
| ASHG19A3A019986 | 0.049482 | 0.263911 | 2.407749 | up | coding | NM_178548    | TFAP2E    | chr1  | + |
| ASHG19A3A020220 | 0.018944 | 0.171603 | 3.165355 | up | coding | NM_001144931 | LOC391322 | chr22 | + |
| ASHG19A3A020291 | 0.042237 | 0.244591 | 4.254935 | up | coding | NM_001039570 | KREMEN1   | chr22 | + |
| ASHG19A3A020305 | 0.020927 | 0.179763 | 2.729755 | up | coding | NM_182527    | CABP7     | chr22 | + |
| ASHG19A3A020314 | 0.008046 | 0.117056 | 3.201782 | up | coding | NM_016498    | MTP18     | chr22 | + |
| ASHG19A3A020481 | 0.032133 | 0.216841 | 2.453178 | up | coding | NM_138435    | FAM83F    | chr22 | + |
| ASHG19A3A020533 | 0.008201 | 0.11816  | 32.00468 | up | coding | NM_001197    | BIK       | chr22 | + |
| ASHG19A3A020702 | 0.015355 | 0.155381 | 2.443766 | up | coding | NM_001136232 | SEC13     | chr3  | - |
| ASHG19A3A020787 | 0.008074 | 0.11723  | 3.099529 | up | coding | NM_001134380 | TBC1D5    | chr3  | - |
| ASHG19A3A021003 | 0.000128 | 0.026534 | 3.559055 | up | coding | NM_001134878 | KIF9      | chr3  | - |

|                 |          |          |          |    |        |              |         |      |   |
|-----------------|----------|----------|----------|----|--------|--------------|---------|------|---|
| ASHG19A3A021008 | 0.00482  | 0.094196 | 9.351858 | up | coding | NM_173642    | RIMKLA  | chr1 | + |
| ASHG19A3A021025 | 0.049386 | 0.263826 | 2.184801 | up | coding | NM_002673    | PLXNB1  | chr3 | - |
| ASHG19A3A021026 | 0.003434 | 0.083068 | 2.086777 | up | coding | NM_024661    | CCDC51  | chr3 | - |
| ASHG19A3A021037 | 5.86E-05 | 0.02082  | 2.063439 | up | coding | NM_006347    | PPIH    | chr1 | + |
| ASHG19A3A021053 | 0.017234 | 0.164416 | 2.089597 | up | coding | NM_000884    | IMPDH2  | chr3 | - |
| ASHG19A3A021082 | 0.048457 | 0.261704 | 3.285868 | up | coding | NM_005879    | TRAIP   | chr3 | - |
| ASHG19A3A021117 | 0.049583 | 0.263911 | 2.518113 | up | coding | NM_001171904 | VPRBP   | chr3 | - |
| ASHG19A3A021163 | 0.004663 | 0.093229 | 79.31767 | up | coding | NM_018397    | CHDH    | chr3 | - |
| ASHG19A3A021185 | 0.005676 | 0.101222 | 4.026732 | up | coding | NM_003865    | HESX1   | chr3 | - |
| ASHG19A3A021444 | 0.001108 | 0.05278  | 2.265097 | up | coding | NM_001164346 | ZBTB20  | chr3 | - |
| ASHG19A3A021484 | 0.006932 | 0.110825 | 2.903624 | up | coding | NM_031458    | PARP9   | chr3 | - |
| ASHG19A3A021505 | 0.000867 | 0.047926 | 4.873139 | up | coding | NM_024628    | SLC12A8 | chr3 | - |
| ASHG19A3A021636 | 0.005448 | 0.099807 | 2.105783 | up | coding | NM_018133    | MSL2    | chr3 | - |
| ASHG19A3A021670 | 0.012902 | 0.143259 | 2.199127 | up | coding | NM_001130993 | RBP1    | chr3 | - |
| ASHG19A3A021672 | 0.029938 | 0.211328 | 16.56109 | up | coding | NM_178177    | NMNAT3  | chr3 | - |
| ASHG19A3A021929 | 0.025895 | 0.197747 | 2.151146 | up | coding | NM_001161561 | TNIK    | chr3 | - |
| ASHG19A3A021975 | 0.044678 | 0.251606 | 2.064079 | up | coding | NM_171830    | KCNMB3  | chr3 | - |
| ASHG19A3A022025 | 0.012937 | 0.143381 | 3.53339  | up | coding | NM_004366    | CLCN2   | chr3 | - |
| ASHG19A3A022155 | 0.008909 | 0.121637 | 6.097376 | up | coding | NM_147192    | DMBX1   | chr1 | + |
| ASHG19A3A022159 | 0.007289 | 0.112695 | 5.949458 | up | coding | NM_033316    | MFI2    | chr3 | - |
| ASHG19A3A022249 | 0.009002 | 0.122111 | 2.404066 | up | coding | NM_001018115 | FANCD2  | chr3 | + |
| ASHG19A3A022412 | 0.000179 | 0.02679  | 15.65363 | up | coding | NM_178868    | CMTM8   | chr3 | + |
| ASHG19A3A022413 | 0.017304 | 0.164583 | 2.961103 | up | coding | NM_138410    | CMTM7   | chr3 | + |
| ASHG19A3A022464 | 0.000683 | 0.043424 | 3.856032 | up | coding | NM_001106    | ACVR2B  | chr3 | + |
| ASHG19A3A022500 | 0.042947 | 0.246559 | 5.032377 | up | coding | NM_004624    | VIPR1   | chr3 | + |
| ASHG19A3A022590 | 0.011199 | 0.134332 | 2.765281 | up | coding | NM_016089    | ZNF589  | chr3 | + |
| ASHG19A3A022634 | 0.008644 | 0.120291 | 3.227972 | up | coding | NM_004186    | SEMA3F  | chr3 | + |
| ASHG19A3A022669 | 0.002492 | 0.071789 | 2.290736 | up | coding | NM_000688    | ALAS1   | chr3 | + |
| ASHG19A3A022701 | 0.000824 | 0.046841 | 17.46892 | up | coding | NM_018725    | IL17RB  | chr3 | + |
| ASHG19A3A022810 | 0.047262 | 0.258579 | 2.024263 | up | coding | NM_174907    | PPP4R2  | chr3 | + |

|                 |          |          |          |    |        |              |          |      |   |
|-----------------|----------|----------|----------|----|--------|--------------|----------|------|---|
| ASHG19A3A022882 | 0.008783 | 0.12054  | 2.135456 | up | coding | NM_001080448 | EPHA6    | chr3 | + |
| ASHG19A3A022919 | 0.000158 | 0.026643 | 3.516795 | up | coding | NM_032359    | C3orf26  | chr3 | + |
| ASHG19A3A022935 | 0.001813 | 0.062815 | 2.032299 | up | coding | NM_017819    | RG9MTD1  | chr3 | + |
| ASHG19A3A022980 | 0.001664 | 0.060728 | 2.965475 | up | coding | NM_001145553 | FLJ25363 | chr3 | + |
| ASHG19A3A023055 | 0.015236 | 0.154966 | 3.188655 | up | coding | NM_015900    | PLA1A    | chr3 | + |
| ASHG19A3A023147 | 0.027158 | 0.201378 | 2.355478 | up | coding | NM_032343    | CHCHD6   | chr3 | + |
| ASHG19A3A023152 | 0.003334 | 0.083052 | 3.577427 | up | coding | NM_004526    | MCM2     | chr3 | + |
| ASHG19A3A023224 | 0.00023  | 0.029723 | 3.182589 | up | coding | NM_001113411 | FGGY     | chr1 | + |
| ASHG19A3A023322 | 0.002235 | 0.069808 | 2.44134  | up | coding | NM_001145319 | PLS1     | chr3 | + |
| ASHG19A3A023513 | 0.008161 | 0.118004 | 19.1194  | up | coding | NM_014373    | GPR160   | chr3 | + |
| ASHG19A3A023519 | 0.032766 | 0.218732 | 2.244548 | up | coding | NM_001145097 | SKIL     | chr3 | + |
| ASHG19A3A023641 | 0.00874  | 0.12054  | 2.681951 | up | coding | NM_032331    | ECE2     | chr3 | + |
| ASHG19A3A023648 | 0.003745 | 0.086124 | 2.711714 | up | coding | NM_006232    | POLR2H   | chr3 | + |
| ASHG19A3A023649 | 0.029963 | 0.211328 | 3.363228 | up | coding | NM_003741    | CHRD     | chr3 | + |
| ASHG19A3A023826 | 0.00721  | 0.112126 | 16.56473 | up | coding | NM_006651    | CPLX1    | chr4 | - |
| ASHG19A3A023848 | 0.000277 | 0.031138 | 2.267532 | up | coding | NM_005663    | WHSC2    | chr4 | - |
| ASHG19A3A023920 | 0.036564 | 0.229691 | 11.54281 | up | coding | NM_001130088 | ABLIM2   | chr4 | - |
| ASHG19A3A023999 | 0.002094 | 0.067286 | 2.566967 | up | coding | NM_017741    | DCAF16   | chr4 | - |
| ASHG19A3A024145 | 0.030943 | 0.213765 | 4.714446 | up | coding | NM_006587    | CORIN    | chr4 | - |
| ASHG19A3A024148 | 0.000644 | 0.042495 | 2.79321  | up | coding | NM_152995    | NFXL1    | chr4 | - |
| ASHG19A3A024158 | 0.028137 | 0.204982 | 3.559655 | up | coding | NM_001014446 | OCIAD2   | chr4 | - |
| ASHG19A3A024202 | 0.004013 | 0.087853 | 103.2763 | up | coding | NM_006681    | NMU      | chr4 | - |
| ASHG19A3A024209 | 0.020733 | 0.178533 | 2.98233  | up | coding | NM_002703    | PPAT     | chr4 | - |
| ASHG19A3A024214 | 0.000324 | 0.032699 | 2.105248 | up | coding | NM_032313    | C4orf14  | chr4 | - |
| ASHG19A3A024618 | 0.019822 | 0.175242 | 2.258642 | up | coding | NM_153426    | PITX2    | chr4 | - |
| ASHG19A3A024624 | 0.000876 | 0.047999 | 3.272948 | up | coding | NM_052864    | TIFA     | chr4 | - |
| ASHG19A3A024627 | 0.001069 | 0.052289 | 2.040297 | up | coding | NM_018392    | C4orf21  | chr4 | - |
| ASHG19A3A025327 | 0.004067 | 0.088276 | 2.126153 | up | coding | NM_025205    | MED28    | chr4 | + |
| ASHG19A3A025635 | 0.006718 | 0.108788 | 3.027283 | up | coding | NM_214711    | C4orf40  | chr4 | + |
| ASHG19A3A025708 | 0.030589 | 0.212961 | 2.702947 | up | coding | NM_020236    | MRPL1    | chr4 | + |

|                 |          |          |          |    |        |              |         |      |   |
|-----------------|----------|----------|----------|----|--------|--------------|---------|------|---|
| ASHG19A3A025713 | 0.036629 | 0.229791 | 8.500017 | up | coding | NM_001166133 | FRAS1   | chr4 | + |
| ASHG19A3A025937 | 0.015482 | 0.15608  | 4.422646 | up | coding | NM_001128174 | UGT8    | chr4 | + |
| ASHG19A3A026092 | 0.038389 | 0.234875 | 2.070485 | up | coding | NM_003601    | SMARCA5 | chr4 | + |
| ASHG19A3A026174 | 0.011165 | 0.134129 | 4.018385 | up | coding | NM_032117    | MND1    | chr4 | + |
| ASHG19A3A026251 | 0.032133 | 0.216841 | 11.35049 | up | coding | NM_152487    | TMEM56  | chr1 | + |
| ASHG19A3A026446 | 0.00417  | 0.088853 | 7.716201 | up | coding | NM_006598    | SLC12A7 | chr5 | - |
| ASHG19A3A026459 | 0.000407 | 0.0346   | 2.058289 | up | coding | NM_024830    | LPCAT1  | chr5 | - |
| ASHG19A3A026506 | 0.000162 | 0.026643 | 2.444196 | up | coding | NM_024091    | FASTKD3 | chr5 | - |
| ASHG19A3A026760 | 0.018101 | 0.167586 | 2.183808 | up | coding | NM_183323    | PAIP1   | chr5 | - |
| ASHG19A3A026795 | 0.000169 | 0.026643 | 73.82207 | up | coding | NM_021147    | CCNO    | chr5 | - |
| ASHG19A3A026977 | 0.033076 | 0.219945 | 2.951786 | up | coding | NM_032367    | ZBED3   | chr5 | - |
| ASHG19A3A027109 | 0.048981 | 0.262507 | 3.155203 | up | coding | NM_020801    | ARRDC3  | chr5 | - |
| ASHG19A3A027227 | 0.025889 | 0.197747 | 2.039457 | up | coding | NM_004772    | C5orf13 | chr5 | - |
| ASHG19A3A027426 | 0.026646 | 0.199921 | 2.504319 | up | coding | NM_001040158 | H2AFY   | chr5 | - |
| ASHG19A3A027511 | 0.044542 | 0.251142 | 8.149381 | up | coding | NM_002587    | PCDH1   | chr5 | - |
| ASHG19A3A027619 | 0.023663 | 0.190115 | 2.692475 | up | coding | NM_015465    | GEMIN5  | chr5 | - |
| ASHG19A3A027757 | 0.002403 | 0.070943 | 2.640479 | up | coding | NM_006261    | PROP1   | chr5 | - |
| ASHG19A3A027815 | 0.001046 | 0.05178  | 2.821395 | up | coding | NM_152283    | ZFP62   | chr5 | - |
| ASHG19A3A027821 | 0.036247 | 0.228825 | 3.06375  | up | coding | NM_203296    | TRIM7   | chr5 | - |
| ASHG19A3A027832 | 0.006083 | 0.103718 | 4.342499 | up | coding | NM_153763    | KCNC4   | chr1 | + |
| ASHG19A3A027846 | 0.00863  | 0.120291 | 3.315111 | up | coding | NM_018140    | CEP72   | chr5 | + |
| ASHG19A3A027849 | 0.000261 | 0.031138 | 4.498128 | up | coding | NM_001166260 | TRIP13  | chr5 | + |
| ASHG19A3A027853 | 0.047978 | 0.260909 | 2.840837 | up | coding | NM_022768    | RBM15   | chr1 | + |
| ASHG19A3A027854 | 0.009679 | 0.12579  | 12.89737 | up | coding | NM_033120    | NKD2    | chr5 | + |
| ASHG19A3A027891 | 0.037338 | 0.231912 | 2.040047 | up | coding | NM_001145161 | UBE2QL1 | chr5 | + |
| ASHG19A3A028103 | 0.047732 | 0.260288 | 9.477014 | up | coding | NM_144722    | SPEF2   | chr5 | + |
| ASHG19A3A028106 | 0.030708 | 0.213149 | 2.553523 | up | coding | NM_181643    | C1orf88 | chr1 | + |
| ASHG19A3A028111 | 0.029453 | 0.210017 | 2.029124 | up | coding | NM_032637    | SKP2    | chr5 | + |
| ASHG19A3A028152 | 0.016048 | 0.158564 | 2.161144 | up | coding | NM_012176    | FBXO4   | chr5 | + |
| ASHG19A3A028181 | 0.005351 | 0.099072 | 3.931918 | up | coding | NM_016640    | MRPS30  | chr5 | + |



|                 |          |          |          |    |        |              |          |      |   |
|-----------------|----------|----------|----------|----|--------|--------------|----------|------|---|
| ASHG19A3A028321 | 0.014581 | 0.152608 | 7.038279 | up | coding | NM_002538    | OCLN     | chr5 | + |
| ASHG19A3A028353 | 0.000269 | 0.031138 | 2.433464 | up | coding | NM_022132    | MCCC2    | chr5 | + |
| ASHG19A3A028698 | 0.007816 | 0.116912 | 3.174574 | up | coding | NM_207317    | ZNF474   | chr5 | + |
| ASHG19A3A028740 | 0.011126 | 0.133887 | 2.745583 | up | coding | NM_023927    | GRAMD3   | chr5 | + |
| ASHG19A3A028748 | 0.040888 | 0.240719 | 2.002479 | up | coding | NM_005573    | LMNB1    | chr5 | + |
| ASHG19A3A028893 | 0.000168 | 0.026643 | 2.294731 | up | coding | NM_018502    | TMCO6    | chr5 | + |
| ASHG19A3A028997 | 0.039311 | 0.236673 | 3.01139  | up | coding | NM_006706    | TCERG1   | chr5 | + |
| ASHG19A3A029020 | 8.1E-05  | 0.023121 | 2.066514 | up | coding | NM_152407    | GRPEL2   | chr5 | + |
| ASHG19A3A029088 | 0.000149 | 0.026643 | 2.138516 | up | coding | NM_017872    | THG1L    | chr5 | + |
| ASHG19A3A029124 | 0.000539 | 0.03874  | 9.494075 | up | coding | NM_001161661 | WWC1     | chr5 | + |
| ASHG19A3A029176 | 0.03148  | 0.214448 | 6.183698 | up | coding | NM_002449    | MSX2     | chr5 | + |
| ASHG19A3A029216 | 0.000781 | 0.045821 | 23.07974 | up | coding | NM_133369    | UNC5A    | chr5 | + |
| ASHG19A3A029227 | 0.033104 | 0.219974 | 3.414114 | up | coding | NM_006480    | RGS14    | chr5 | + |
| ASHG19A3A029681 | 0.012845 | 0.142797 | 2.228512 | up | coding | NM_001264    | CDSN     | chr6 | - |
| ASHG19A3A029703 | 0.02685  | 0.20079  | 2.011088 | up | coding | NM_033177    | BAT4     | chr6 | - |
| ASHG19A3A029705 | 0.003262 | 0.082065 | 2.577011 | up | coding | NM_021160    | BAT5     | chr6 | - |
| ASHG19A3A029713 | 0.016474 | 0.160332 | 2.465856 | up | coding | NM_025258    | C6orf27  | chr6 | - |
| ASHG19A3A029787 | 0.021986 | 0.183319 | 2.132959 | up | coding | NM_001141969 | DAXX     | chr6 | - |
| ASHG19A3A029833 | 0.005786 | 0.101967 | 2.97994  | up | coding | NM_052961    | SLC26A8  | chr6 | - |
| ASHG19A3A029928 | 0.000403 | 0.034548 | 2.068462 | up | coding | NM_199184    | C6orf108 | chr6 | - |
| ASHG19A3A029967 | 0.020637 | 0.178323 | 3.015329 | up | coding | NM_021572    | ENPP5    | chr6 | - |
| ASHG19A3A030039 | 0.034568 | 0.22417  | 4.141369 | up | coding | NM_016513    | ICK      | chr6 | - |
| ASHG19A3A030275 | 0.028678 | 0.207322 | 2.997647 | up | coding | NM_145332    | MAP3K7   | chr6 | - |
| ASHG19A3A030455 | 0.014103 | 0.150369 | 2.717432 | up | coding | NM_153255    | MCM9     | chr6 | - |
| ASHG19A3A030525 | 0.00664  | 0.108362 | 4.757371 | up | coding | NM_030908    | OR2A4    | chr6 | - |
| ASHG19A3A030526 | 0.000631 | 0.042132 | 8.560802 | up | coding | NM_001145659 | CTAGE9   | chr6 | - |
| ASHG19A3A030566 | 0.015569 | 0.156493 | 2.184805 | up | coding | NM_001145207 | HBS1L    | chr6 | - |
| ASHG19A3A030641 | 0.000296 | 0.031812 | 2.995791 | up | coding | NM_182503    | ADAT2    | chr6 | - |
| ASHG19A3A030881 | 0.003296 | 0.082544 | 5.246237 | up | coding | NM_003568    | ANXA9    | chr1 | + |
| ASHG19A3A030894 | 0.009526 | 0.125185 | 2.12316  | up | coding | NM_001012983 | FAM136B  | chr6 | + |

|                 |          |          |          |    |        |              |          |      |   |
|-----------------|----------|----------|----------|----|--------|--------------|----------|------|---|
| ASHG19A3A031048 | 0.04995  | 0.264788 | 2.919698 | up | coding | NM_003107    | SOX4     | chr6 | + |
| ASHG19A3A031063 | 0.033781 | 0.222049 | 3.298756 | up | coding | NM_001080    | ALDH5A1  | chr6 | + |
| ASHG19A3A031099 | 0.026141 | 0.198323 | 3.18957  | up | coding | NM_003542    | HIST1H4C | chr6 | + |
| ASHG19A3A031143 | 0.006418 | 0.106091 | 13.90455 | up | coding | NM_005865    | PRSS16   | chr6 | + |
| ASHG19A3A031167 | 0.011477 | 0.135767 | 6.944183 | up | coding | NM_003447    | ZNF165   | chr6 | + |
| ASHG19A3A031231 | 0.034745 | 0.2247   | 2.927945 | up | coding | NM_004091    | E2F2     | chr1 | - |
| ASHG19A3A031311 | 0.028441 | 0.20607  | 3.339949 | up | coding | NM_002441    | MSH5     | chr6 | + |
| ASHG19A3A031314 | 0.006221 | 0.10488  | 2.027433 | up | coding | NM_001039651 | C6orf26  | chr6 | + |
| ASHG19A3A031359 | 0.036003 | 0.228089 | 6.187098 | up | coding | NM_014234    | HSD17B8  | chr6 | + |
| ASHG19A3A031429 | 0.018554 | 0.170069 | 3.729189 | up | coding | NM_002754    | MAPK13   | chr6 | + |
| ASHG19A3A031474 | 0.038819 | 0.23597  | 2.10506  | up | coding | NM_173080    | SPRR4    | chr1 | + |
| ASHG19A3A031478 | 0.02346  | 0.189502 | 3.610924 | up | coding | NM_003125    | SPRR1B   | chr1 | + |
| ASHG19A3A031507 | 0.005498 | 0.100265 | 2.223358 | up | coding | NM_005586    | MDF1     | chr6 | + |
| ASHG19A3A031820 | 0.003632 | 0.084345 | 3.845257 | up | coding | NM_001010853 | PM20D2   | chr6 | + |
| ASHG19A3A031924 | 0.001181 | 0.054008 | 2.415782 | up | coding | NM_003080    | SMPD2    | chr6 | + |
| ASHG19A3A031942 | 0.034613 | 0.224228 | 8.0125   | up | coding | NM_018593    | SLC16A10 | chr6 | + |
| ASHG19A3A031980 | 0.012222 | 0.139575 | 2.283964 | up | coding | NM_152729    | NT5DC1   | chr6 | + |
| ASHG19A3A031993 | 0.003458 | 0.083068 | 2.231673 | up | coding | NM_001010892 | RSPH4A   | chr6 | + |
| ASHG19A3A032036 | 0.022569 | 0.186    | 6.593873 | up | coding | NM_003287    | TPD52L1  | chr6 | + |
| ASHG19A3A032374 | 0.023536 | 0.189657 | 2.639212 | up | coding | NM_002607    | PDGFA    | chr7 | - |
| ASHG19A3A032381 | 0.022613 | 0.186121 | 7.602376 | up | coding | NM_006869    | ADAP1    | chr7 | - |
| ASHG19A3A032390 | 0.04682  | 0.256983 | 6.791319 | up | coding | NM_001097620 | TMEM184A | chr7 | - |
| ASHG19A3A032467 | 0.012653 | 0.141839 | 5.287628 | up | coding | NM_004968    | ICA1     | chr7 | - |
| ASHG19A3A032493 | 0.03464  | 0.224329 | 4.714192 | up | coding | NM_001004320 | TMEM195  | chr7 | - |
| ASHG19A3A032549 | 0.027067 | 0.201258 | 3.392036 | up | coding | NM_013293    | TRA2A    | chr7 | - |
| ASHG19A3A032589 | 0.013156 | 0.144292 | 3.302964 | up | coding | NM_006896    | HOXA7    | chr7 | - |
| ASHG19A3A032808 | 0.031331 | 0.214234 | 5.091538 | up | coding | NM_015198    | COBL     | chr7 | - |
| ASHG19A3A032921 | 0.00032  | 0.032699 | 3.580025 | up | coding | NM_178558    | ZNF680   | chr7 | - |
| ASHG19A3A032937 | 0.047626 | 0.259894 | 2.137035 | up | coding | NM_000181    | GUSB     | chr7 | - |
| ASHG19A3A032976 | 0.020978 | 0.179896 | 2.046719 | up | coding | NM_031468    | CALN1    | chr7 | - |

|                 |          |          |          |    |        |              |           |      |   |
|-----------------|----------|----------|----------|----|--------|--------------|-----------|------|---|
| ASHG19A3A033184 | 0.040012 | 0.238412 | 8.610316 | up | coding | NM_000940    | PON3      | chr7 | - |
| ASHG19A3A033186 | 0.021482 | 0.182093 | 2.904681 | up | coding | NM_001160210 | SLC25A13  | chr7 | - |
| ASHG19A3A033208 | 0.000924 | 0.04953  | 2.555668 | up | coding | NM_018842    | BAIAP2L1  | chr7 | - |
| ASHG19A3A033238 | 0.014574 | 0.152608 | 2.128712 | up | coding | NM_181538    | GJC3      | chr7 | - |
| ASHG19A3A033263 | 0.002679 | 0.074424 | 19.76286 | up | coding | NM_003227    | TFR2      | chr7 | - |
| ASHG19A3A033277 | 0.003834 | 0.086652 | 6.991657 | up | coding | NM_003378    | VGF       | chr7 | - |
| ASHG19A3A033283 | 0.031029 | 0.213884 | 2.005729 | up | coding | NM_014343    | CLDN15    | chr7 | - |
| ASHG19A3A033318 | 0.016031 | 0.158564 | 2.021165 | up | coding | NM_014377    | DNAJC2    | chr7 | - |
| ASHG19A3A033380 | 0.005277 | 0.098632 | 2.938867 | up | coding | NM_032549    | IMMP2L    | chr7 | - |
| ASHG19A3A033490 | 0.023391 | 0.189502 | 2.240707 | up | coding | NM_176814    | ZNF800    | chr7 | - |
| ASHG19A3A033501 | 0.00038  | 0.034338 | 2.716392 | up | coding | NM_018077    | RBM28     | chr7 | - |
| ASHG19A3A033608 | 0.000967 | 0.050297 | 2.68759  | up | coding | NM_080660    | ZC3HAV1L  | chr7 | - |
| ASHG19A3A033693 | 0.015818 | 0.157775 | 28.78494 | up | coding | NM_001003702 | ARHGEF35  | chr7 | - |
| ASHG19A3A033731 | 0.003487 | 0.083333 | 6.445045 | up | coding | NM_001164458 | ACTR3C    | chr7 | - |
| ASHG19A3A033816 | 0.003468 | 0.083068 | 3.92736  | up | coding | NM_001165255 | MNX1      | chr7 | - |
| ASHG19A3A033817 | 0.000791 | 0.04611  | 3.499113 | up | coding | NM_005515    | MNX1      | chr7 | - |
| ASHG19A3A033844 | 2.52E-05 | 0.016153 | 2.059396 | up | coding | NM_017802    | HEATR2    | chr7 | + |
| ASHG19A3A034073 | 0.015844 | 0.157775 | 2.050517 | up | coding | NM_016587    | CBX3      | chr7 | + |
| ASHG19A3A034075 | 0.00389  | 0.086787 | 23.50234 | up | coding | NM_013322    | SNX10     | chr7 | + |
| ASHG19A3A034276 | 0.001139 | 0.053195 | 2.095455 | up | coding | NM_021130    | PPIA      | chr7 | + |
| ASHG19A3A034329 | 0.008965 | 0.121993 | 2.296369 | up | coding | NM_182595    | POM121L12 | chr7 | + |
| ASHG19A3A034363 | 0.000471 | 0.037342 | 2.443111 | up | coding | NM_015969    | MRPS17    | chr7 | + |
| ASHG19A3A034482 | 0.046449 | 0.256201 | 3.056576 | up | coding | NM_153033    | KCTD7     | chr7 | + |
| ASHG19A3A034584 | 0.005498 | 0.100265 | 4.556877 | up | coding | NM_007155    | ZP3       | chr7 | + |
| ASHG19A3A034669 | 0.000265 | 0.031138 | 5.111835 | up | coding | NM_021721    | ADAM22    | chr7 | + |
| ASHG19A3A034726 | 0.006706 | 0.10868  | 6.539002 | up | coding | NM_001166160 | PPP1R9A   | chr7 | + |
| ASHG19A3A034740 | 0.02506  | 0.1947   | 2.181809 | up | coding | NM_020186    | ACN9      | chr7 | + |
| ASHG19A3A034749 | 0.000516 | 0.03796  | 2.018529 | up | coding | NM_014916    | LMTK2     | chr7 | + |
| ASHG19A3A034801 | 0.000527 | 0.038338 | 4.100761 | up | coding | NM_175047    | PILRB     | chr7 | + |
| ASHG19A3A034821 | 0.015014 | 0.153921 | 4.196763 | up | coding | NM_000799    | EPO       | chr7 | + |

|                 |          |          |          |    |        |              |           |      |   |
|-----------------|----------|----------|----------|----|--------|--------------|-----------|------|---|
| ASHG19A3A034847 | 0.011927 | 0.138388 | 3.350035 | up | coding | NM_020979    | SH2B2     | chr7 | + |
| ASHG19A3A034893 | 0.000196 | 0.02801  | 2.296182 | up | coding | NM_181581    | DUS4L     | chr7 | + |
| ASHG19A3A034942 | 0.002598 | 0.072555 | 4.556475 | up | coding | NM_000245    | MET       | chr7 | + |
| ASHG19A3A035026 | 0.001512 | 0.05887  | 2.826217 | up | coding | NM_013332    | C7orf68   | chr7 | + |
| ASHG19A3A035051 | 0.003697 | 0.08533  | 16.20111 | up | coding | NM_178562    | TSPAN33   | chr7 | + |
| ASHG19A3A035075 | 0.001234 | 0.054115 | 17.03702 | up | coding | NM_177524    | MEST      | chr7 | + |
| ASHG19A3A035158 | 0.027066 | 0.201258 | 2.256887 | up | coding | NM_173569    | UBN2      | chr7 | + |
| ASHG19A3A035173 | 0.025802 | 0.197501 | 2.071734 | up | coding | NM_052853    | ADCK2     | chr7 | + |
| ASHG19A3A035182 | 0.000177 | 0.026643 | 2.164561 | up | coding | NM_003143    | SSBP1     | chr7 | + |
| ASHG19A3A035185 | 0.008487 | 0.11964  | 2.175322 | up | coding | NM_018980    | TAS2R5    | chr7 | + |
| ASHG19A3A035235 | 0.002516 | 0.071789 | 5.462539 | up | coding | NM_001008747 | LOC441294 | chr7 | + |
| ASHG19A3A035259 | 0.00157  | 0.059794 | 3.309622 | up | coding | NM_198495    | CTAGE4    | chr7 | + |
| ASHG19A3A035266 | 0.003238 | 0.081978 | 17.5882  | up | coding | NM_005435    | ARHGEF5   | chr7 | + |
| ASHG19A3A035307 | 0.003353 | 0.083054 | 17.60581 | up | coding | NM_001142928 | LRRC61    | chr7 | + |
| ASHG19A3A035308 | 0.002876 | 0.078019 | 45.19085 | up | coding | NM_138434    | C7orf29   | chr7 | + |
| ASHG19A3A035311 | 0.004384 | 0.09113  | 2.615775 | up | coding | NM_014374    | REPIN1    | chr7 | + |
| ASHG19A3A035368 | 0.001755 | 0.062007 | 4.279801 | up | coding | NM_020445    | ACTR3B    | chr7 | + |
| ASHG19A3A035608 | 0.017261 | 0.164505 | 2.86635  | up | coding | NM_003844    | TNFRSF10A | chr8 | - |
| ASHG19A3A035639 | 0.005431 | 0.099637 | 2.349906 | up | coding | NM_000742    | CHRNA2    | chr8 | - |
| ASHG19A3A035673 | 0.00611  | 0.10388  | 2.376767 | up | coding | NM_001015508 | PURG      | chr8 | - |
| ASHG19A3A035766 | 0.048442 | 0.261704 | 2.436075 | up | coding | NM_015941    | ATP6V1H   | chr8 | - |
| ASHG19A3A035780 | 0.000201 | 0.028229 | 2.458025 | up | coding | NM_152417    | TMEM68    | chr8 | - |
| ASHG19A3A035817 | 0.025962 | 0.197944 | 3.483465 | up | coding | NM_000370    | TTPA      | chr8 | - |
| ASHG19A3A035857 | 0.014353 | 0.151394 | 2.248795 | up | coding | NM_016027    | LACTB2    | chr8 | - |
| ASHG19A3A035879 | 0.000798 | 0.046401 | 55.56162 | up | coding | NM_020647    | JPH1      | chr8 | - |
| ASHG19A3A035895 | 0.012368 | 0.140397 | 4.197907 | up | coding | NM_005079    | TPD52     | chr8 | - |
| ASHG19A3A035914 | 0.002699 | 0.074583 | 2.322296 | up | coding | NM_022133    | SNX16     | chr8 | - |
| ASHG19A3A035918 | 0.010956 | 0.133053 | 10.59824 | up | coding | NM_001099670 | C8orf59   | chr8 | - |
| ASHG19A3A035963 | 0.032579 | 0.217794 | 3.133682 | up | coding | NM_012415    | RAD54B    | chr8 | - |
| ASHG19A3A036007 | 0.00096  | 0.050231 | 7.90872  | up | coding | NM_003406    | YWHAZ     | chr8 | - |

|                 |          |          |          |    |        |              |         |      |   |
|-----------------|----------|----------|----------|----|--------|--------------|---------|------|---|
| ASHG19A3A036069 | 0.025324 | 0.195324 | 2.032311 | up | coding | NM_003756    | EIF3H   | chr8 | - |
| ASHG19A3A036070 | 0.00045  | 0.036675 | 2.631679 | up | coding | NM_006265    | RAD21   | chr8 | - |
| ASHG19A3A036091 | 0.002173 | 0.068508 | 6.814556 | up | coding | NM_024094    | DSCC1   | chr8 | - |
| ASHG19A3A036103 | 0.028703 | 0.20736  | 3.612164 | up | coding | NM_014109    | ATAD2   | chr8 | - |
| ASHG19A3A036110 | 0.035373 | 0.22646  | 3.492562 | up | coding | NM_001003954 | ANXA13  | chr8 | - |
| ASHG19A3A036118 | 0.02316  | 0.188616 | 3.398844 | up | coding | NM_032026    | TATDN1  | chr8 | - |
| ASHG19A3A036125 | 0.007915 | 0.117056 | 30.08031 | up | coding | NM_174911    | FAM84B  | chr8 | - |
| ASHG19A3A036191 | 0.011741 | 0.137842 | 7.303176 | up | coding | NM_015193    | ARC     | chr8 | - |
| ASHG19A3A036212 | 0.010734 | 0.131781 | 3.330588 | up | coding | NM_052963    | TOP1MT  | chr8 | - |
| ASHG19A3A036218 | 0.041063 | 0.241118 | 3.799054 | up | coding | NM_001100878 | C8orf73 | chr8 | - |
| ASHG19A3A036219 | 0.009613 | 0.125668 | 4.945273 | up | coding | NM_145201    | NAPRT1  | chr8 | - |
| ASHG19A3A036222 | 0.002842 | 0.077477 | 2.394365 | up | coding | NM_001137669 | RGSL1   | chr1 | + |
| ASHG19A3A036228 | 0.003429 | 0.083068 | 14.83943 | up | coding | NM_198488    | FAM83H  | chr8 | - |
| ASHG19A3A036244 | 0.027854 | 0.203809 | 6.117215 | up | coding | NM_017570    | OPLAH   | chr8 | - |
| ASHG19A3A036257 | 0.002592 | 0.072555 | 2.383997 | up | coding | NM_017767    | SLC39A4 | chr8 | - |
| ASHG19A3A036268 | 0.01387  | 0.148967 | 2.031807 | up | coding | NM_001024678 | LRRC24  | chr8 | - |
| ASHG19A3A036281 | 0.034984 | 0.225239 | 2.805968 | up | coding | NM_001109689 | ZNF250  | chr8 | - |
| ASHG19A3A036414 | 0.027881 | 0.203809 | 4.017648 | up | coding | NM_182795    | NPM2    | chr8 | + |
| ASHG19A3A036487 | 0.037249 | 0.231712 | 6.085387 | up | coding | NM_017412    | FZD3    | chr8 | + |
| ASHG19A3A036503 | 0.005096 | 0.096773 | 2.70801  | up | coding | NM_007212    | RNF2    | chr1 | + |
| ASHG19A3A036527 | 0.02526  | 0.195276 | 2.773998 | up | coding | NM_032509    | MAK16   | chr8 | + |
| ASHG19A3A036637 | 0.000177 | 0.026643 | 2.181157 | up | coding | NM_001077619 | UBXN2B  | chr8 | + |
| ASHG19A3A036643 | 0.028403 | 0.206039 | 3.118035 | up | coding | NM_017780    | CHD7    | chr8 | + |
| ASHG19A3A036720 | 0.017788 | 0.166328 | 4.418003 | up | coding | NM_001444    | FABP5   | chr8 | + |
| ASHG19A3A036723 | 0.004978 | 0.095751 | 30.91375 | up | coding | NM_152284    | CHMP4C  | chr8 | + |
| ASHG19A3A036730 | 0.003464 | 0.083068 | 3.582096 | up | coding | NM_001083588 | E2F5    | chr8 | + |
| ASHG19A3A036865 | 0.029557 | 0.210204 | 2.650132 | up | coding | NM_032334    | UTP23   | chr8 | + |
| ASHG19A3A036870 | 0.000511 | 0.03796  | 3.125008 | up | coding | NM_080651    | MED30   | chr8 | + |
| ASHG19A3A036882 | 0.04916  | 0.263156 | 5.099365 | up | coding | NM_022045    | MTBP    | chr8 | + |
| ASHG19A3A036954 | 0.024123 | 0.191703 | 4.021003 | up | coding | NM_017444    | CHRAC1  | chr8 | + |

|                 |          |          |          |    |        |              |           |      |   |
|-----------------|----------|----------|----------|----|--------|--------------|-----------|------|---|
| ASHG19A3A036978 | 0.000422 | 0.034859 | 5.953918 | up | coding | NM_016647    | C8orf55   | chr8 | + |
| ASHG19A3A037012 | 0.007276 | 0.112595 | 3.035221 | up | coding | NM_001099280 | HEATR7A   | chr8 | + |
| ASHG19A3A037026 | 0.021802 | 0.182857 | 2.062917 | up | coding | NM_138431    | MFSD3     | chr8 | + |
| ASHG19A3A037088 | 0.011789 | 0.137852 | 3.855591 | up | coding | NM_005059    | RLN2      | chr9 | - |
| ASHG19A3A037094 | 0.008022 | 0.117056 | 2.249849 | up | coding | NM_024896    | ERMP1     | chr9 | - |
| ASHG19A3A037139 | 0.023063 | 0.188017 | 2.689158 | up | coding | NM_021144    | PSIP1     | chr9 | - |
| ASHG19A3A037274 | 0.036807 | 0.230437 | 3.70248  | up | coding | NM_020702    | KIAA1161  | chr9 | - |
| ASHG19A3A037310 | 0.015078 | 0.154275 | 3.426247 | up | coding | NM_032818    | C9orf100  | chr9 | - |
| ASHG19A3A037367 | 0.001045 | 0.05178  | 5.461181 | up | coding | NM_147195    | ANKRD18A  | chr9 | - |
| ASHG19A3A037413 | 0.044099 | 0.249946 | 2.565917 | up | coding | NM_001012419 | ANKRD20A3 | chr9 | - |
| ASHG19A3A037567 | 0.034125 | 0.22306  | 2.565038 | up | coding | NM_001128618 | C9orf57   | chr9 | - |
| ASHG19A3A037672 | 0.025387 | 0.195457 | 12.20692 | up | coding | NM_006378    | SEMA4D    | chr9 | - |
| ASHG19A3A037689 | 0.048999 | 0.262507 | 2.063368 | up | coding | NM_001698    | AUH       | chr9 | - |
| ASHG19A3A037697 | 0.007183 | 0.111953 | 2.582785 | up | coding | NM_002161    | IARS      | chr9 | - |
| ASHG19A3A037708 | 0.030623 | 0.212961 | 3.043258 | up | coding | NM_001003800 | BICD2     | chr9 | - |
| ASHG19A3A037740 | 0.000105 | 0.024093 | 2.190579 | up | coding | NM_000136    | FANCC     | chr9 | - |
| ASHG19A3A037769 | 0.002513 | 0.071789 | 3.387818 | up | coding | NM_001001662 | ZNF782    | chr9 | - |
| ASHG19A3A037774 | 0.000704 | 0.044249 | 12.70092 | up | coding | NM_001333    | CTSL2     | chr9 | - |
| ASHG19A3A037798 | 0.01305  | 0.143918 | 2.367555 | up | coding | NM_014788    | TRIM14    | chr9 | - |
| ASHG19A3A037799 | 0.015416 | 0.15563  | 2.78419  | up | coding | NM_003389    | CORO2A    | chr9 | - |
| ASHG19A3A038013 | 9.63E-05 | 0.023735 | 2.280631 | up | coding | NM_020924    | ZBTB26    | chr9 | - |
| ASHG19A3A038029 | 0.001279 | 0.054115 | 2.567782 | up | coding | NM_001489    | NR6A1     | chr9 | - |
| ASHG19A3A038031 | 0.035142 | 0.225952 | 2.057624 | up | coding | NM_001017404 | LGR6      | chr1 | + |
| ASHG19A3A038062 | 0.00185  | 0.063402 | 2.1822   | up | coding | NM_005489    | SH2D3C    | chr9 | - |
| ASHG19A3A038092 | 0.016306 | 0.1597   | 2.42185  | up | coding | NM_052844    | WDR34     | chr9 | - |
| ASHG19A3A038199 | 0.00343  | 0.083068 | 2.167279 | up | coding | NM_001012415 | SOHLH1    | chr9 | - |
| ASHG19A3A038254 | 0.003525 | 0.083557 | 2.865619 | up | coding | NM_203468    | ENTPD2    | chr9 | - |
| ASHG19A3A038255 | 6.48E-05 | 0.021793 | 10.26923 | up | coding | NM_178448    | C9orf140  | chr9 | - |
| ASHG19A3A038263 | 0.001865 | 0.063402 | 4.309305 | up | coding | NM_031297    | RNF208    | chr9 | - |
| ASHG19A3A038269 | 0.032317 | 0.216983 | 30.2622  | up | coding | NM_001004354 | NRARP     | chr9 | - |

|                 |          |          |          |    |        |              |          |      |   |
|-----------------|----------|----------|----------|----|--------|--------------|----------|------|---|
| ASHG19A3A038278 | 0.029695 | 0.210462 | 2.11522  | up | coding | NM_138462    | ZMYND19  | chr9 | - |
| ASHG19A3A038295 | 0.019758 | 0.175242 | 2.023778 | up | coding | NM_015158    | KANK1    | chr9 | + |
| ASHG19A3A038560 | 0.047581 | 0.259877 | 2.178238 | up | coding | NM_032226    | ZCCHC7   | chr9 | + |
| ASHG19A3A038749 | 0.003555 | 0.083577 | 2.250447 | up | coding | NM_000144    | FXN      | chr9 | + |
| ASHG19A3A038751 | 0.000398 | 0.034548 | 2.316704 | up | coding | NM_001170414 | TJP2     | chr9 | + |
| ASHG19A3A038880 | 0.021665 | 0.182455 | 2.405227 | up | coding | NM_004938    | DAPK1    | chr9 | + |
| ASHG19A3A038905 | 0.046478 | 0.256201 | 2.842408 | up | coding | NM_001827    | CKS2     | chr9 | + |
| ASHG19A3A038964 | 0.030304 | 0.212773 | 2.231299 | up | coding | NM_194320    | ZNF169   | chr9 | + |
| ASHG19A3A039073 | 0.003372 | 0.083054 | 5.080377 | up | coding | NM_031919    | FSD1L    | chr9 | + |
| ASHG19A3A039074 | 0.00341  | 0.083068 | 2.657104 | up | coding | NM_207647    | FSD1L    | chr9 | + |
| ASHG19A3A039121 | 0.019335 | 0.173754 | 4.896447 | up | coding | NM_133465    | KIAA1958 | chr9 | + |
| ASHG19A3A039131 | 0.001842 | 0.063301 | 4.818953 | up | coding | NM_144488    | RGS3     | chr9 | + |
| ASHG19A3A039191 | 0.007117 | 0.111447 | 2.172355 | up | coding | NM_138777    | MRRF     | chr9 | + |
| ASHG19A3A039275 | 0.000214 | 0.029048 | 2.622503 | up | coding | NM_024112    | C9orf16  | chr9 | + |
| ASHG19A3A039290 | 0.037761 | 0.233374 | 3.928161 | up | coding | NM_001122821 | SET      | chr9 | + |
| ASHG19A3A039293 | 0.015508 | 0.156257 | 3.504679 | up | coding | NM_013355    | PKN3     | chr9 | + |
| ASHG19A3A039343 | 0.00166  | 0.060728 | 10.99963 | up | coding | NM_021619    | PRDM12   | chr9 | + |
| ASHG19A3A039350 | 0.006034 | 0.103576 | 35.45818 | up | coding | NM_031426    | AIF1L    | chr9 | + |
| ASHG19A3A039388 | 0.000506 | 0.03796  | 2.342098 | up | coding | NM_017503    | SURF2    | chr9 | + |
| ASHG19A3A039452 | 0.000527 | 0.038338 | 7.656067 | up | coding | NM_152571    | C9orf163 | chr9 | + |
| ASHG19A3A039469 | 0.005695 | 0.10136  | 2.156149 | up | coding | NM_021138    | TRAF2    | chr9 | + |
| ASHG19A3A039476 | 0.000333 | 0.0328   | 2.424327 | up | coding | NM_183241    | C9orf142 | chr9 | + |
| ASHG19A3A039490 | 0.037098 | 0.23155  | 2.031297 | up | coding | NM_199001    | C9orf169 | chr9 | + |
| ASHG19A3A039501 | 0.034804 | 0.224937 | 2.104104 | up | coding | NM_152285    | ARRDC1   | chr9 | + |
| ASHG19A3A039544 | 0.00476  | 0.093712 | 2.895716 | up | coding | NM_005044    | PRKX     | chrX | - |
| ASHG19A3A039617 | 0.001124 | 0.053047 | 2.099363 | up | coding | NM_024087    | ASB9     | chrX | - |
| ASHG19A3A039759 | 0.007341 | 0.113039 | 2.954945 | up | coding | NM_014053    | FLVCR1   | chr1 | + |
| ASHG19A3A039965 | 0.030387 | 0.212773 | 2.508585 | up | coding | NM_001010862 | SPIN3    | chrX | - |
| ASHG19A3A039981 | 0.014979 | 0.15381  | 2.388384 | up | coding | NM_152424    | FAM123B  | chrX | - |
| ASHG19A3A040061 | 0.010036 | 0.127474 | 2.002359 | up | coding | NM_001122670 | PHKA1    | chrX | - |

|                 |          |          |          |    |        |              |          |       |   |
|-----------------|----------|----------|----------|----|--------|--------------|----------|-------|---|
| ASHG19A3A040263 | 0.044337 | 0.250664 | 5.217742 | up | coding | NM_022746    | MOSC1    | chr1  | + |
| ASHG19A3A040311 | 0.020138 | 0.176389 | 2.054256 | up | coding | NM_033495    | KLHL13   | chrX  | - |
| ASHG19A3A040612 | 0.005089 | 0.096773 | 2.61899  | up | coding | NM_001018025 | MTCP1    | chrX  | - |
| ASHG19A3A040675 | 0.002345 | 0.070872 | 3.841609 | up | coding | NM_001830    | CLCN4    | chrX  | + |
| ASHG19A3A040694 | 0.049477 | 0.263911 | 2.355022 | up | coding | NM_003611    | OFD1     | chrX  | + |
| ASHG19A3A040718 | 0.006867 | 0.110159 | 3.47355  | up | coding | NM_018360    | TXLNG    | chrX  | + |
| ASHG19A3A040759 | 0.048184 | 0.261212 | 3.805004 | up | coding | NM_001415    | EIF2S3   | chrX  | + |
| ASHG19A3A040762 | 0.046766 | 0.256798 | 2.163375 | up | coding | NM_005391    | PDK3     | chrX  | + |
| ASHG19A3A040863 | 0.002155 | 0.068327 | 2.310086 | up | coding | NM_001039590 | USP9X    | chrX  | + |
| ASHG19A3A040909 | 0.003168 | 0.081393 | 2.339021 | up | coding | NM_033018    | CDK16    | chrX  | + |
| ASHG19A3A040930 | 0.017377 | 0.164752 | 5.079319 | up | coding | NM_020247    | CABC1    | chr1  | + |
| ASHG19A3A040948 | 0.005095 | 0.096773 | 2.098538 | up | coding | NM_006579    | EBP      | chrX  | + |
| ASHG19A3A041080 | 0.003408 | 0.083068 | 14.76148 | up | coding | NM_174912    | FAAH2    | chrX  | + |
| ASHG19A3A041147 | 0.025806 | 0.197501 | 3.838955 | up | coding | NM_001166278 | DLG3     | chrX  | + |
| ASHG19A3A041252 | 0.015581 | 0.156493 | 4.368842 | up | coding | NM_021998    | ZNF711   | chrX  | + |
| ASHG19A3A041304 | 0.033899 | 0.22223  | 3.143279 | up | coding | NM_021029    | RPL36A   | chrX  | + |
| ASHG19A3A041342 | 7.15E-05 | 0.022087 | 2.387494 | up | coding | NM_001006639 | TCEAL1   | chrX  | + |
| ASHG19A3A041471 | 0.022328 | 0.184784 | 2.153951 | up | coding | NM_006777    | ZBTB33   | chrX  | + |
| ASHG19A3A042018 | 0.00168  | 0.060728 | 2.307366 | up | coding | NM_001037277 | GGPS1    | chr1  | + |
| ASHG19A3A042263 | 0.005937 | 0.103084 | 3.173531 | up | coding | NM_205768    | ZNF238   | chr1  | + |
| ASHG19A3A042344 | 0.031353 | 0.214234 | 2.332164 | up | coding | NM_015155    | LARP4B   | chr10 | - |
| ASHG19A3A042592 | 0.034278 | 0.223597 | 3.246568 | up | coding | NM_018287    | ARHGAP12 | chr10 | - |
| ASHG19A3A042666 | 0.004772 | 0.093712 | 2.089535 | up | coding | NM_001098205 | HNRNPF   | chr10 | - |
| ASHG19A3A042729 | 0.02671  | 0.200238 | 2.343391 | up | coding | NM_001137548 | FAM25C   | chr10 | - |
| ASHG19A3A042769 | 0.004622 | 0.093083 | 2.564867 | up | coding | NM_023009    | MARCKSL1 | chr1  | - |
| ASHG19A3A042875 | 0.038518 | 0.235108 | 6.063277 | up | coding | NM_201262    | DNAJC12  | chr10 | - |
| ASHG19A3A042884 | 0.032342 | 0.216983 | 3.426448 | up | coding | NM_001080449 | DNA2     | chr10 | - |
| ASHG19A3A042910 | 0.000573 | 0.04011  | 2.366763 | up | coding | NM_021129    | PPA1     | chr10 | - |
| ASHG19A3A042920 | 0.001491 | 0.058762 | 3.516923 | up | coding | NM_000281    | PCBD1    | chr10 | - |
| ASHG19A3A042926 | 0.035982 | 0.228089 | 2.292109 | up | coding | NM_022153    | C10orf54 | chr10 | - |



|                 |          |          |          |    |        |              |          |       |   |
|-----------------|----------|----------|----------|----|--------|--------------|----------|-------|---|
| ASHG19A3A042943 | 0.018198 | 0.167894 | 2.010295 | up | coding | NM_001625    | AK2      | chr1  | - |
| ASHG19A3A042987 | 0.01365  | 0.148073 | 3.547072 | up | coding | NM_144589    | COMTD1   | chr10 | - |
| ASHG19A3A043057 | 0.003363 | 0.083054 | 3.57085  | up | coding | NM_017551    | GRID1    | chr10 | - |
| ASHG19A3A043162 | 0.00108  | 0.052289 | 3.349506 | up | coding | NM_152309    | PIK3AP1  | chr10 | - |
| ASHG19A3A043171 | 0.04714  | 0.258093 | 2.103857 | up | coding | NM_015179    | RRP12    | chr10 | - |
| ASHG19A3A043223 | 0.001199 | 0.054008 | 2.856542 | up | coding | NM_001085398 | TLX1NB   | chr10 | - |
| ASHG19A3A043235 | 0.001319 | 0.055247 | 3.652021 | up | coding | NM_006993    | NPM3     | chr10 | - |
| ASHG19A3A043248 | 0.027631 | 0.203009 | 2.448456 | up | coding | NM_024886    | C10orf95 | chr10 | - |
| ASHG19A3A043336 | 0.047197 | 0.258303 | 2.882713 | up | coding | NM_001127211 | KIAA1598 | chr10 | - |
| ASHG19A3A043359 | 0.012582 | 0.141627 | 2.649596 | up | coding | NM_213649    | SFXN4    | chr10 | - |
| ASHG19A3A043382 | 0.043886 | 0.249307 | 2.431804 | up | coding | NM_001001976 | ATE1     | chr10 | - |
| ASHG19A3A043384 | 0.027883 | 0.203809 | 2.538558 | up | coding | NM_001167865 | NSMCE4A  | chr10 | - |
| ASHG19A3A043626 | 0.014026 | 0.150161 | 2.211891 | up | coding | NM_018518    | MCM10    | chr10 | + |
| ASHG19A3A043635 | 0.038879 | 0.236109 | 33.54434 | up | coding | NM_001099439 | EPHA10   | chr1  | - |
| ASHG19A3A043645 | 0.01655  | 0.160573 | 3.339104 | up | coding | NM_183005    | RPP38    | chr10 | + |
| ASHG19A3A043729 | 0.013855 | 0.148967 | 2.098889 | up | coding | NM_014317    | PDSS1    | chr10 | + |
| ASHG19A3A043855 | 0.003669 | 0.084977 | 3.598652 | up | coding | NM_145312    | ZNF485   | chr10 | + |
| ASHG19A3A043877 | 0.006126 | 0.103938 | 2.568453 | up | coding | NM_000698    | ALOX5    | chr10 | + |
| ASHG19A3A043909 | 0.001513 | 0.05887  | 4.185274 | up | coding | NM_153034    | ZNF488   | chr10 | + |
| ASHG19A3A043976 | 0.016354 | 0.15979  | 3.382693 | up | coding | NM_003201    | TFAM     | chr10 | + |
| ASHG19A3A044029 | 8.52E-05 | 0.023249 | 2.273928 | up | coding | NM_001142498 | SIRT1    | chr10 | + |
| ASHG19A3A044040 | 0.001078 | 0.052289 | 17.9221  | up | coding | NM_152709    | STOX1    | chr10 | + |
| ASHG19A3A044041 | 0.002978 | 0.079547 | 2.558977 | up | coding | NM_001130161 | STOX1    | chr10 | + |
| ASHG19A3A044057 | 0.000497 | 0.037875 | 14.79367 | up | coding | NM_145306    | C10orf35 | chr10 | + |
| ASHG19A3A044060 | 0.015417 | 0.15563  | 11.14322 | up | coding | NM_001033082 | MYCL1    | chr1  | - |
| ASHG19A3A044061 | 0.000566 | 0.040042 | 15.46576 | up | coding | NM_005376    | MYCL1    | chr1  | - |
| ASHG19A3A044062 | 0.000805 | 0.046519 | 12.66465 | up | coding | NM_178545    | TMEM52   | chr1  | - |
| ASHG19A3A044063 | 0.004415 | 0.091547 | 2.036939 | up | coding | NM_001033081 | MYCL1    | chr1  | - |
| ASHG19A3A044171 | 0.042495 | 0.24503  | 2.086205 | up | coding | NM_001099692 | EIF5AL1  | chr10 | + |
| ASHG19A3A044199 | 0.00075  | 0.045141 | 2.188635 | up | coding | NM_001010848 | NRG3     | chr10 | + |

|                 |          |          |          |    |        |              |          |       |   |
|-----------------|----------|----------|----------|----|--------|--------------|----------|-------|---|
| ASHG19A3A044226 | 0.012388 | 0.14047  | 2.529867 | up | coding | NM_001080116 | LDB3     | chr10 | + |
| ASHG19A3A044334 | 0.000428 | 0.035225 | 2.702398 | up | coding | NM_001134375 | CCNJ     | chr10 | + |
| ASHG19A3A044366 | 0.021495 | 0.182093 | 8.38704  | up | coding | NM_001010917 | GOLGA7B  | chr10 | + |
| ASHG19A3A044380 | 0.021172 | 0.180493 | 3.641012 | up | coding | NM_000392    | ABCC2    | chr10 | + |
| ASHG19A3A044426 | 0.001394 | 0.056564 | 4.478343 | up | coding | NM_024789    | TMEM180  | chr10 | + |
| ASHG19A3A044431 | 0.008181 | 0.118059 | 2.739932 | up | coding | NM_178858    | SFXN2    | chr10 | + |
| ASHG19A3A044454 | 0.00227  | 0.069865 | 21.11201 | up | coding | NM_183239    | GSTO2    | chr10 | + |
| ASHG19A3A044499 | 0.039101 | 0.236631 | 2.439373 | up | coding | NM_016234    | ACSL5    | chr10 | + |
| ASHG19A3A044539 | 0.0275   | 0.202466 | 2.02796  | up | coding | NM_006229    | PNLIPRP1 | chr10 | + |
| ASHG19A3A044634 | 0.00872  | 0.12054  | 2.016786 | up | coding | NM_016567    | BCCIP    | chr10 | + |
| ASHG19A3A044817 | 0.000557 | 0.039766 | 2.389928 | up | coding | NM_001005238 | OR51G2   | chr11 | - |
| ASHG19A3A044961 | 0.011924 | 0.138388 | 22.51246 | up | coding | NM_148976    | PSMA1    | chr11 | - |
| ASHG19A3A045022 | 0.001268 | 0.054115 | 2.707115 | up | coding | NM_030771    | CCDC34   | chr11 | - |
| ASHG19A3A045023 | 0.025478 | 0.196    | 5.566586 | up | coding | NM_080654    | CCDC34   | chr11 | - |
| ASHG19A3A045252 | 0.015198 | 0.154958 | 14.291   | up | coding | NM_004200    | SYT7     | chr11 | - |
| ASHG19A3A045289 | 0.003243 | 0.081978 | 2.842552 | up | coding | NM_018093    | WDR74    | chr11 | - |
| ASHG19A3A045302 | 0.048562 | 0.261741 | 2.178785 | up | coding | NM_007069    | PLA2G16  | chr11 | - |
| ASHG19A3A045311 | 0.001743 | 0.061817 | 3.606576 | up | coding | NM_014067    | MACROD1  | chr11 | - |
| ASHG19A3A045327 | 0.032338 | 0.216983 | 2.492361 | up | coding | NM_153819    | RASGRP2  | chr11 | - |
| ASHG19A3A045390 | 0.007755 | 0.116556 | 2.117171 | up | coding | NM_016050    | MRPL11   | chr11 | - |
| ASHG19A3A045419 | 0.033552 | 0.221543 | 3.296504 | up | coding | NM_181843    | NUDT8    | chr11 | - |
| ASHG19A3A045435 | 0.011821 | 0.137852 | 4.863297 | up | coding | NM_001039656 | MTL5     | chr11 | - |
| ASHG19A3A045448 | 0.046217 | 0.255615 | 14.91898 | up | coding | NM_005117    | FGF19    | chr11 | - |
| ASHG19A3A045476 | 0.032149 | 0.216841 | 5.039543 | up | coding | NM_006645    | STARD10  | chr11 | - |
| ASHG19A3A045503 | 0.004019 | 0.087853 | 3.962181 | up | coding | NM_001039548 | KLHL35   | chr11 | - |
| ASHG19A3A045509 | 0.010533 | 0.130758 | 11.22572 | up | coding | NM_004626    | WNT11    | chr11 | - |
| ASHG19A3A045520 | 0.000158 | 0.026643 | 2.246777 | up | coding | NM_001293    | CLNS1A   | chr11 | - |
| ASHG19A3A045552 | 0.019339 | 0.173754 | 2.545559 | up | coding | NM_001039618 | CREBZF   | chr11 | - |
| ASHG19A3A045594 | 0.000462 | 0.037144 | 2.591467 | up | coding | NM_024116    | TAF1D    | chr11 | - |
| ASHG19A3A045608 | 0.007477 | 0.114158 | 2.235467 | up | coding | NM_144664    | FAM76B   | chr11 | - |

|                 |          |          |          |    |        |              |          |       |   |
|-----------------|----------|----------|----------|----|--------|--------------|----------|-------|---|
| ASHG19A3A045736 | 0.00363  | 0.084345 | 2.184161 | up | coding | NM_021603    | FXYD2    | chr11 | - |
| ASHG19A3A045767 | 0.016753 | 0.162038 | 2.447928 | up | coding | NM_001164277 | SLC37A4  | chr11 | - |
| ASHG19A3A045787 | 0.016229 | 0.159515 | 3.090732 | up | coding | NM_002855    | PVRL1    | chr11 | - |
| ASHG19A3A045867 | 0.017038 | 0.163449 | 6.010164 | up | coding | NM_001142685 | ARHGAP32 | chr11 | - |
| ASHG19A3A045876 | 0.01792  | 0.166896 | 2.314093 | up | coding | NM_014155    | ZBTB44   | chr11 | - |
| ASHG19A3A045920 | 0.00053  | 0.038338 | 26.83084 | up | coding | NM_007183    | PKP3     | chr11 | + |
| ASHG19A3A045930 | 0.015727 | 0.157449 | 4.424032 | up | coding | NM_000797    | DRD4     | chr11 | + |
| ASHG19A3A045933 | 0.041788 | 0.243388 | 2.828016 | up | coding | NM_022772    | EPS8L2   | chr11 | + |
| ASHG19A3A046099 | 0.003394 | 0.083068 | 3.687018 | up | coding | NM_013250    | ZNF215   | chr11 | + |
| ASHG19A3A046142 | 0.020168 | 0.176573 | 2.855338 | up | coding | NM_001025390 | AMPD3    | chr11 | + |
| ASHG19A3A046162 | 0.033366 | 0.220909 | 2.788948 | up | coding | NM_001080521 | RASSF10  | chr11 | + |
| ASHG19A3A046206 | 0.004694 | 0.093354 | 3.584884 | up | coding | NM_001098523 | HTATIP2  | chr11 | + |
| ASHG19A3A046207 | 0.014961 | 0.153769 | 2.506377 | up | coding | NM_005788    | PRMT3    | chr11 | + |
| ASHG19A3A046336 | 0.009092 | 0.122394 | 2.086134 | up | coding | NM_000506    | F2       | chr11 | + |
| ASHG19A3A046342 | 0.000472 | 0.037342 | 2.353675 | up | coding | NM_001130102 | NR1H3    | chr11 | + |
| ASHG19A3A046450 | 0.036427 | 0.229406 | 3.106033 | up | coding | NM_004177    | STX3     | chr11 | + |
| ASHG19A3A046478 | 0.034529 | 0.22417  | 2.541074 | up | coding | NM_015533    | DAK      | chr11 | + |
| ASHG19A3A046524 | 0.009585 | 0.125609 | 2.34263  | up | coding | NM_001142538 | LGALS12  | chr11 | + |
| ASHG19A3A046529 | 0.000227 | 0.029723 | 2.462781 | up | coding | NM_017490    | MARK2    | chr11 | + |
| ASHG19A3A046576 | 0.001747 | 0.061846 | 5.41925  | up | coding | NM_003273    | TM7SF2   | chr11 | + |
| ASHG19A3A046589 | 4.61E-05 | 0.019118 | 5.055593 | up | coding | NM_145719    | TIGD3    | chr11 | + |
| ASHG19A3A046619 | 0.005583 | 0.100699 | 3.381163 | up | coding | NM_032027    | TM2D1    | chr1  | - |
| ASHG19A3A046682 | 0.014651 | 0.152736 | 14.13582 | up | coding | NM_138768    | MYEOV    | chr11 | + |
| ASHG19A3A046720 | 0.034558 | 0.22417  | 14.98876 | up | coding | NM_016729    | FOLR1    | chr11 | + |
| ASHG19A3A046751 | 0.002847 | 0.077477 | 2.607364 | up | coding | NM_014288    | ITGB3BP  | chr1  | - |
| ASHG19A3A046773 | 0.001072 | 0.052289 | 7.203339 | up | coding | NM_032564    | DGAT2    | chr11 | + |
| ASHG19A3A046804 | 0.019977 | 0.175878 | 5.837808 | up | coding | NM_145018    | C11orf82 | chr11 | + |
| ASHG19A3A046810 | 0.023281 | 0.189222 | 2.168143 | up | coding | NM_015885    | PCF11    | chr11 | + |
| ASHG19A3A046819 | 0.001498 | 0.058762 | 2.095929 | up | coding | NM_173556    | CCDC83   | chr11 | + |
| ASHG19A3A046861 | 0.005788 | 0.101967 | 2.818012 | up | coding | NM_033395    | KIAA1731 | chr11 | + |

|                 |          |          |          |    |        |              |          |       |   |
|-----------------|----------|----------|----------|----|--------|--------------|----------|-------|---|
| ASHG19A3A046866 | 0.040549 | 0.239831 | 2.404737 | up | coding | NM_014039    | C11orf54 | chr11 | + |
| ASHG19A3A046875 | 0.0263   | 0.198352 | 5.13708  | up | coding | NM_002033    | FUT4     | chr11 | + |
| ASHG19A3A046912 | 0.024041 | 0.191703 | 2.305511 | up | coding | NM_015423    | AASDHPPT | chr11 | + |
| ASHG19A3A046928 | 0.000802 | 0.046471 | 2.377889 | up | coding | NM_001018067 | SERBP1   | chr1  | - |
| ASHG19A3A046963 | 9.44E-07 | 0.00314  | 2.135966 | up | coding | NM_017868    | TTC12    | chr11 | + |
| ASHG19A3A047165 | 0.008385 | 0.118908 | 11.87691 | up | coding | NM_138342    | GLB1L2   | chr11 | + |
| ASHG19A3A047339 | 0.002373 | 0.07092  | 2.377053 | up | coding | NM_005039    | PRB1     | chr12 | - |
| ASHG19A3A047355 | 0.000977 | 0.050424 | 2.370648 | up | coding | NM_001080555 | GSG1     | chr12 | - |
| ASHG19A3A047554 | 0.006602 | 0.107838 | 5.903722 | up | coding | NM_144593    | RHEBL1   | chr12 | - |
| ASHG19A3A047564 | 0.00022  | 0.029361 | 3.33386  | up | coding | NM_032130    | FAM186B  | chr12 | - |
| ASHG19A3A047582 | 0.00484  | 0.094205 | 3.954226 | up | coding | NM_001174129 | SLC11A2  | chr12 | - |
| ASHG19A3A047595 | 0.004726 | 0.093712 | 5.528712 | up | coding | NM_007210    | GALNT6   | chr12 | - |
| ASHG19A3A047611 | 0.043449 | 0.248075 | 2.372781 | up | coding | NM_017818    | WDR8     | chr1  | - |
| ASHG19A3A047716 | 0.000138 | 0.026643 | 2.10585  | up | coding | NM_014830    | ZBTB39   | chr12 | - |
| ASHG19A3A047725 | 0.011102 | 0.133854 | 2.195249 | up | coding | NM_001080156 | ARHGAP9  | chr12 | - |
| ASHG19A3A047726 | 0.000499 | 0.037875 | 3.305648 | up | coding | NM_001080157 | ARHGAP9  | chr12 | - |
| ASHG19A3A047851 | 0.026395 | 0.198669 | 2.432994 | up | coding | NM_014167    | CCDC59   | chr12 | - |
| ASHG19A3A047905 | 0.001464 | 0.058292 | 2.892665 | up | coding | NM_001127362 | NR2C1    | chr12 | - |
| ASHG19A3A047929 | 0.003777 | 0.086428 | 2.466159 | up | coding | NM_152788    | ANKS1B   | chr12 | - |
| ASHG19A3A047935 | 0.008236 | 0.118382 | 29.86817 | up | coding | NM_017600    | GOLGA2B  | chr12 | - |
| ASHG19A3A047993 | 0.005162 | 0.097577 | 2.911409 | up | coding | NM_001001655 | ALKBH2   | chr12 | - |
| ASHG19A3A048027 | 0.0251   | 0.194782 | 10.40969 | up | coding | NM_004658    | RASAL1   | chr12 | - |
| ASHG19A3A048213 | 0.048548 | 0.261739 | 2.517212 | up | coding | NM_213655    | HSN2     | chr12 | + |
| ASHG19A3A048300 | 0.000353 | 0.033584 | 3.321669 | up | coding | NM_080548    | PTPN6    | chr12 | + |
| ASHG19A3A048353 | 0.002905 | 0.078231 | 2.699239 | up | coding | NM_000350    | ABCA4    | chr1  | - |
| ASHG19A3A048415 | 0.004017 | 0.087853 | 2.750458 | up | coding | NM_030671    | PTPRO    | chr12 | + |
| ASHG19A3A048466 | 0.039982 | 0.238412 | 2.473802 | up | coding | NM_001145010 | C12orf70 | chr12 | + |
| ASHG19A3A048553 | 0.023358 | 0.189502 | 2.951777 | up | coding | NM_005430    | WNT1     | chr12 | + |
| ASHG19A3A048609 | 0.030402 | 0.212773 | 2.038408 | up | coding | NM_001077401 | ACVRL1   | chr12 | + |
| ASHG19A3A048658 | 0.014733 | 0.152783 | 14.21393 | up | coding | NM_014212    | HOXC11   | chr12 | + |

|                 |          |          |          |    |        |              |          |       |   |
|-----------------|----------|----------|----------|----|--------|--------------|----------|-------|---|
| ASHG19A3A048699 | 0.010324 | 0.129408 | 11.19697 | up | coding | NM_152637    | METTL7B  | chr12 | + |
| ASHG19A3A048715 | 0.008116 | 0.117659 | 11.29975 | up | coding | NM_001005915 | ERBB3    | chr12 | + |
| ASHG19A3A048755 | 0.007549 | 0.11456  | 2.320854 | up | coding | NM_024779    | PIP4K2C  | chr12 | + |
| ASHG19A3A048837 | 0.020349 | 0.177153 | 3.30443  | up | coding | NM_006530    | YEATS4   | chr12 | + |
| ASHG19A3A048841 | 0.012126 | 0.139317 | 2.364239 | up | coding | NM_175624    | RAB3IP   | chr12 | + |
| ASHG19A3A048843 | 0.004748 | 0.093712 | 9.624068 | up | coding | NM_175623    | RAB3IP   | chr12 | + |
| ASHG19A3A048938 | 0.04978  | 0.264293 | 3.687959 | up | coding | NM_152435    | AMDHD1   | chr12 | + |
| ASHG19A3A049013 | 0.010384 | 0.129853 | 2.577252 | up | coding | NM_014653    | WSCD2    | chr12 | + |
| ASHG19A3A049029 | 0.001957 | 0.064873 | 3.401987 | up | coding | NM_032829    | C12orf34 | chr12 | + |
| ASHG19A3A049063 | 0.034886 | 0.225065 | 2.749019 | up | coding | NM_002535    | OAS2     | chr12 | + |
| ASHG19A3A049086 | 0.023712 | 0.190426 | 4.109015 | up | coding | NM_001109903 | RNFT2    | chr12 | + |
| ASHG19A3A049105 | 0.002586 | 0.072555 | 73.52969 | up | coding | NM_207311    | CCDC64   | chr12 | + |
| ASHG19A3A049182 | 0.017313 | 0.164583 | 2.21113  | up | coding | NM_080626    | BRI3BP   | chr12 | + |
| ASHG19A3A049225 | 1.68E-06 | 0.004529 | 2.446652 | up | coding | NM_001170543 | PGAM5    | chr12 | + |
| ASHG19A3A049357 | 0.032535 | 0.217592 | 83.82333 | up | coding | NM_001265    | CDX2     | chr13 | - |
| ASHG19A3A049409 | 0.039526 | 0.237281 | 2.224637 | up | coding | NM_006402    | HBXIP    | chr1  | - |
| ASHG19A3A049703 | 0.000205 | 0.028229 | 2.966517 | up | coding | NM_032229    | SLITRK6  | chr13 | - |
| ASHG19A3A049743 | 0.048963 | 0.262507 | 2.394853 | up | coding | NM_005167    | PPM1J    | chr1  | - |
| ASHG19A3A049790 | 0.015914 | 0.158066 | 37.30868 | up | coding | NM_033132    | ZIC5     | chr13 | - |
| ASHG19A3A049794 | 0.012987 | 0.143604 | 4.300046 | up | coding | NM_003051    | SLC16A1  | chr1  | - |
| ASHG19A3A049836 | 0.005341 | 0.099072 | 7.821966 | up | coding | NM_017817    | RAB20    | chr13 | - |
| ASHG19A3A049863 | 0.045605 | 0.254019 | 8.856573 | up | coding | NM_024719    | GRTP1    | chr13 | - |
| ASHG19A3A049955 | 0.01361  | 0.147985 | 4.454113 | up | coding | NM_001166271 | SPATA13  | chr13 | + |
| ASHG19A3A049996 | 0.031578 | 0.214527 | 5.666203 | up | coding | NM_000209    | PDX1     | chr13 | + |
| ASHG19A3A050034 | 0.024215 | 0.19182  | 3.231868 | up | coding | NM_000059    | BRCA2    | chr13 | + |
| ASHG19A3A050040 | 0.040527 | 0.239831 | 3.915847 | up | coding | NM_015032    | PDS5B    | chr13 | + |
| ASHG19A3A050048 | 0.02525  | 0.195276 | 2.814716 | up | coding | NM_002915    | RFC3     | chr13 | + |
| ASHG19A3A050196 | 0.010664 | 0.131368 | 2.508112 | up | coding | NM_024570    | RNASEH2B | chr13 | + |
| ASHG19A3A050427 | 0.010518 | 0.130747 | 13.54451 | up | coding | NM_007129    | ZIC2     | chr13 | + |
| ASHG19A3A050598 | 0.020865 | 0.179416 | 2.723367 | up | coding | NM_001130706 | C14orf93 | chr14 | - |

|                 |          |          |          |    |        |              |          |       |   |
|-----------------|----------|----------|----------|----|--------|--------------|----------|-------|---|
| ASHG19A3A050632 | 0.002701 | 0.074583 | 6.507918 | up | coding | NM_003917    | APIG2    | chr14 | - |
| ASHG19A3A050796 | 0.027485 | 0.202466 | 3.649936 | up | coding | NM_001202    | BMP4     | chr14 | - |
| ASHG19A3A050804 | 0.042809 | 0.246455 | 6.358949 | up | coding | NM_000161    | GCH1     | chr14 | - |
| ASHG19A3A050866 | 2.16E-05 | 0.016153 | 6.374813 | up | coding | NM_001008726 | WDR89    | chr14 | - |
| ASHG19A3A050895 | 0.021791 | 0.182857 | 2.494857 | up | coding | NM_016445    | PLEK2    | chr14 | - |
| ASHG19A3A050974 | 0.003092 | 0.080421 | 5.242568 | up | coding | NM_031464    | RPS6KL1  | chr14 | - |
| ASHG19A3A051008 | 0.007091 | 0.111447 | 2.660097 | up | coding | NM_213601    | TMED8    | chr14 | - |
| ASHG19A3A051078 | 0.003316 | 0.082717 | 3.806126 | up | coding | NM_001142594 | ITPK1    | chr14 | - |
| ASHG19A3A051193 | 0.00715  | 0.111651 | 2.644574 | up | coding | NM_177533    | NUDT14   | chr14 | - |
| ASHG19A3A051302 | 0.015304 | 0.155135 | 5.061123 | up | coding | NM_005794    | DHRS2    | chr14 | + |
| ASHG19A3A051444 | 0.008974 | 0.122004 | 3.167275 | up | coding | NM_016361    | ACP6     | chr1  | - |
| ASHG19A3A051451 | 4.27E-05 | 0.019118 | 2.355496 | up | coding | NM_181703    | GJA5     | chr1  | - |
| ASHG19A3A051472 | 0.003273 | 0.082065 | 2.848668 | up | coding | NM_207377    | TOMM20L  | chr14 | + |
| ASHG19A3A051544 | 0.024238 | 0.191865 | 4.508148 | up | coding | NM_001172    | ARG2     | chr14 | + |
| ASHG19A3A051635 | 3.12E-05 | 0.016153 | 2.037105 | up | coding | NM_004452    | ESRRB    | chr14 | + |
| ASHG19A3A051648 | 0.025407 | 0.195528 | 19.0545  | up | coding | NM_020431    | TMEM63C  | chr14 | + |
| ASHG19A3A051723 | 0.035367 | 0.22646  | 2.29058  | up | coding | NM_023112    | OTUB2    | chr14 | + |
| ASHG19A3A052013 | 0.01983  | 0.175242 | 7.251813 | up | coding | NM_001039905 | C15orf56 | chr15 | - |
| ASHG19A3A052027 | 0.00487  | 0.094654 | 13.41341 | up | coding | NM_133639    | RHOV     | chr15 | - |
| ASHG19A3A052030 | 0.001117 | 0.05299  | 2.652641 | up | coding | NM_152596    | EXD1     | chr15 | - |
| ASHG19A3A052032 | 0.039261 | 0.236631 | 3.609479 | up | coding | NM_007280    | OIP5     | chr15 | - |
| ASHG19A3A052170 | 0.009598 | 0.12562  | 2.663475 | up | coding | NM_130810    | DYX1C1   | chr15 | - |
| ASHG19A3A052227 | 0.010003 | 0.127458 | 3.189668 | up | coding | NM_178431    | LCE3A    | chr1  | - |
| ASHG19A3A052258 | 0.000409 | 0.0346   | 2.958534 | up | coding | NM_001014291 | SPRR2G   | chr1  | - |
| ASHG19A3A052320 | 0.001287 | 0.054217 | 2.122828 | up | coding | NM_006305    | ANP32A   | chr15 | - |
| ASHG19A3A052394 | 0.046918 | 0.257368 | 3.251925 | up | coding | NM_017793    | RPP25    | chr15 | - |
| ASHG19A3A052445 | 0.035322 | 0.22646  | 7.846889 | up | coding | NM_004390    | CTSH     | chr15 | - |
| ASHG19A3A052451 | 0.00012  | 0.025865 | 2.456208 | up | coding | NM_006441    | MTHFS    | chr15 | - |
| ASHG19A3A052466 | 0.026987 | 0.201258 | 2.483741 | up | coding | NM_014856    | DENND4B  | chr1  | - |
| ASHG19A3A052784 | 0.043447 | 0.248075 | 17.24822 | up | coding | NM_001130448 | C15orf62 | chr15 | + |

|                 |          |          |          |    |        |              |          |       |   |
|-----------------|----------|----------|----------|----|--------|--------------|----------|-------|---|
| ASHG19A3A052884 | 0.003842 | 0.086652 | 2.897705 | up | coding | NM_002044    | GALK2    | chr15 | + |
| ASHG19A3A052887 | 0.003395 | 0.083068 | 8.057613 | up | coding | NM_003645    | SLC27A2  | chr15 | + |
| ASHG19A3A052911 | 0.029325 | 0.209824 | 4.449936 | up | coding | NM_198524    | TEX9     | chr15 | + |
| ASHG19A3A052916 | 0.024731 | 0.193409 | 5.331876 | up | coding | NM_207036    | TCF12    | chr15 | + |
| ASHG19A3A052928 | 0.004783 | 0.09382  | 3.354162 | up | coding | NM_020980    | AQP9     | chr15 | + |
| ASHG19A3A053067 | 0.000841 | 0.047109 | 2.218648 | up | coding | NM_201526    | ISLR     | chr15 | + |
| ASHG19A3A053072 | 0.019651 | 0.174937 | 2.040395 | up | coding | NM_006465    | ARID3B   | chr15 | + |
| ASHG19A3A053083 | 0.010641 | 0.131368 | 2.186847 | up | coding | NM_015492    | C15orf39 | chr15 | + |
| ASHG19A3A053129 | 0.015101 | 0.154388 | 3.145264 | up | coding | NM_000745    | CHRNA5   | chr15 | + |
| ASHG19A3A053215 | 0.014508 | 0.152381 | 2.635721 | up | coding | NM_001113378 | FANCI    | chr15 | + |
| ASHG19A3A053244 | 0.000972 | 0.050297 | 3.109029 | up | coding | NM_000057    | BLM      | chr15 | + |
| ASHG19A3A053333 | 0.002241 | 0.069808 | 3.090452 | up | coding | NM_003502    | AXIN1    | chr16 | - |
| ASHG19A3A053345 | 0.033806 | 0.222131 | 6.727789 | up | coding | NM_153350    | FBXL16   | chr16 | - |
| ASHG19A3A053388 | 0.000109 | 0.0244   | 2.339147 | up | coding | NM_002528    | NTHL1    | chr16 | - |
| ASHG19A3A053411 | 0.017376 | 0.164752 | 21.18046 | up | coding | NM_022119    | PRSS22   | chr16 | - |
| ASHG19A3A053434 | 0.003547 | 0.083557 | 3.039713 | up | coding | NM_016292    | TRAP1    | chr16 | - |
| ASHG19A3A053442 | 0.027523 | 0.202466 | 2.010823 | up | coding | NM_003223    | TFAP4    | chr16 | - |
| ASHG19A3A053444 | 0.009132 | 0.122749 | 2.206849 | up | coding | NM_016069    | TIMM16   | chr16 | - |
| ASHG19A3A053467 | 0.003231 | 0.081978 | 3.21602  | up | coding | NM_015421    | TMEM186  | chr16 | - |
| ASHG19A3A053496 | 0.021693 | 0.182455 | 2.632398 | up | coding | NM_001130007 | GSPT1    | chr16 | - |
| ASHG19A3A053512 | 0.041046 | 0.241102 | 2.516048 | up | coding | NM_018427    | RRN3     | chr16 | - |
| ASHG19A3A053525 | 0.045397 | 0.253461 | 18.2078  | up | coding | NM_001878    | CRABP2   | chr1  | - |
| ASHG19A3A053536 | 0.001454 | 0.058028 | 2.224458 | up | coding | NM_001019    | RPS15A   | chr16 | - |
| ASHG19A3A053624 | 0.001017 | 0.051214 | 11.44894 | up | coding | NM_177536    | SULT1A1  | chr16 | - |
| ASHG19A3A053664 | 0.003008 | 0.079913 | 2.380431 | up | coding | NM_024096    | DCTPP1   | chr16 | - |
| ASHG19A3A053670 | 0.030721 | 0.213149 | 2.254613 | up | coding | NM_023931    | ZNF747   | chr16 | - |
| ASHG19A3A053687 | 0.030924 | 0.213711 | 2.207862 | up | coding | NM_001172668 | ZNF668   | chr16 | - |
| ASHG19A3A053819 | 0.043077 | 0.24695  | 2.990904 | up | coding | NM_181521    | CMTM4    | chr16 | - |
| ASHG19A3A053826 | 0.017685 | 0.16577  | 2.978244 | up | coding | NM_005894    | CD5L     | chr1  | - |
| ASHG19A3A053869 | 0.03884  | 0.236018 | 2.453396 | up | coding | NM_024939    | ESRP2    | chr16 | - |

|                 |          |          |          |    |        |              |          |       |   |
|-----------------|----------|----------|----------|----|--------|--------------|----------|-------|---|
| ASHG19A3A053883 | 0.000271 | 0.031138 | 2.630464 | up | coding | NM_014062    | NOB1     | chr16 | - |
| ASHG19A3A053904 | 0.020277 | 0.176867 | 4.16166  | up | coding | NM_145911    | ZNF23    | chr16 | - |
| ASHG19A3A053932 | 0.04247  | 0.244962 | 56.55832 | up | coding | NM_024306    | FA2H     | chr16 | - |
| ASHG19A3A053941 | 0.011815 | 0.137852 | 2.043081 | up | coding | NM_001005279 | OR6K2    | chr1  | - |
| ASHG19A3A053981 | 0.042326 | 0.244731 | 2.342832 | up | coding | NM_001100873 | C16orf46 | chr16 | - |
| ASHG19A3A054024 | 0.014731 | 0.152783 | 2.826132 | up | coding | NM_016095    | GINS2    | chr16 | - |
| ASHG19A3A054048 | 0.036551 | 0.229691 | 4.845826 | up | coding | NM_003486    | SLC7A5   | chr16 | - |
| ASHG19A3A054054 | 0.007746 | 0.116508 | 5.206118 | up | coding | NM_178310    | SNAI3    | chr16 | - |
| ASHG19A3A054123 | 0.04984  | 0.264464 | 2.315828 | up | coding | NM_138418    | FAM195A  | chr16 | + |
| ASHG19A3A054140 | 0.001353 | 0.055969 | 4.228603 | up | coding | NM_207112    | HAGHL    | chr16 | + |
| ASHG19A3A054143 | 0.000189 | 0.027342 | 2.435572 | up | coding | NM_022092    | CHTF18   | chr16 | + |
| ASHG19A3A054147 | 0.026705 | 0.200238 | 9.444511 | up | coding | NM_014587    | SOX8     | chr16 | + |
| ASHG19A3A054184 | 0.006329 | 0.105194 | 2.042268 | up | coding | NM_000548    | TSC2     | chr16 | + |
| ASHG19A3A054195 | 0.038006 | 0.233813 | 2.811689 | up | coding | NM_025108    | C16orf59 | chr16 | + |
| ASHG19A3A054219 | 0.009141 | 0.122749 | 3.204778 | up | coding | NM_024339    | THOC6    | chr16 | + |
| ASHG19A3A054316 | 0.021067 | 0.180024 | 3.85247  | up | coding | NM_001128423 | MPV17L   | chr16 | + |
| ASHG19A3A054334 | 0.030353 | 0.212773 | 12.09731 | up | coding | NM_016946    | F11R     | chr1  | - |
| ASHG19A3A054345 | 0.006215 | 0.10488  | 20.21165 | up | coding | NM_001113207 | TSTD1    | chr1  | - |
| ASHG19A3A054435 | 0.03131  | 0.214234 | 2.397876 | up | coding | NM_001178098 | CD19     | chr16 | + |
| ASHG19A3A054466 | 0.040275 | 0.239195 | 2.446677 | up | coding | NM_184043    | ALDOA    | chr16 | + |
| ASHG19A3A054478 | 0.001675 | 0.060728 | 2.159791 | up | coding | NM_152652    | ZNF48    | chr16 | + |
| ASHG19A3A054593 | 0.005756 | 0.101967 | 8.456052 | up | coding | NM_005853    | IRX5     | chr16 | + |
| ASHG19A3A054600 | 0.003856 | 0.086652 | 2.441144 | up | coding | NM_001043    | SLC6A2   | chr16 | + |
| ASHG19A3A054660 | 0.002236 | 0.069808 | 2.486845 | up | coding | NM_014157    | CCDC113  | chr16 | + |
| ASHG19A3A054675 | 0.00784  | 0.116921 | 2.680299 | up | coding | NM_001178020 | BEAN     | chr16 | + |
| ASHG19A3A054698 | 0.016983 | 0.163179 | 4.19981  | up | coding | NM_024712    | ELMO3    | chr16 | + |
| ASHG19A3A054716 | 0.005276 | 0.098632 | 7.130817 | up | coding | NM_001037281 | PARD6A   | chr16 | + |
| ASHG19A3A054732 | 0.031461 | 0.214448 | 2.05825  | up | coding | NM_173163    | NFATC3   | chr16 | + |
| ASHG19A3A054742 | 0.036703 | 0.230049 | 9.550174 | up | coding | NM_005329    | HAS3     | chr16 | + |
| ASHG19A3A054747 | 0.033692 | 0.221614 | 2.08201  | up | coding | NM_016101    | NIP7     | chr16 | + |



|                     |          |          |          |    |        |                    |           |       |   |
|---------------------|----------|----------|----------|----|--------|--------------------|-----------|-------|---|
| ASHG19A3A054763     | 0.019488 | 0.174349 | 2.037368 | up | coding | NM_145059          | FUK       | chr16 | + |
| ASHG19A3A054764     | 0.013091 | 0.143918 | 2.146112 | up | coding | NM_012426          | SF3B3     | chr16 | + |
| ASHG19A3A054771     | 0.015613 | 0.156727 | 26.0299  | up | coding | NM_052858          | MARVELD3  | chr16 | + |
| ASHG19A3A054772     | 0.015459 | 0.155929 | 87.97141 | up | coding | NM_001017967       | MARVELD3  | chr16 | + |
| ASHG19A3A054817     | 0.023618 | 0.190032 | 3.814239 | up | coding | NM_016373          | WVOX      | chr16 | + |
| ASHG19A3A054828     | 0.002243 | 0.069808 | 3.035852 | up | coding | NM_198390          | CMIP      | chr16 | + |
| ASHG19A3A054905     | 0.01625  | 0.159638 | 2.33809  | up | coding | NM_030928          | CDT1      | chr16 | + |
| ASHG19A3A054929     | 0.020246 | 0.176782 | 3.400587 | up | coding | NM_014427          | CPNE7     | chr16 | + |
| ASHG19A3A054959     | 0.046559 | 0.256323 | 2.054897 | up | coding | NM_003585          | DOC2B     | chr17 | - |
| ASHG19A3A055038     | 0.00237  | 0.07092  | 2.465468 | up | coding | NM_001140          | ALOX15    | chr17 | - |
| ASHG19A3A055041     | 0.019746 | 0.175242 | 10.76509 | up | coding | NM_022059          | CXCL16    | chr17 | - |
| ASHG19A3H0000524    | 0.004673 | 0.093229 | 2.105897 | up | coding | NM_024017_intron2+ | NM_024017 | chr17 | + |
| ASHG19A3H0000546    | 0.001898 | 0.063466 | 2.849617 | up | coding | NM_019102_intron2+ | NM_019102 | chr7  | + |
| ASHG19A3H0000579    | 0.029474 | 0.210089 | 2.021699 | up | coding | NM_002146_Exon3+   | NM_002146 | chr17 | + |
| ASHG19A3H0000623    | 0.015258 | 0.154986 | 2.408604 | up | coding | NM_153631_Exon4+   | NM_153631 | chr7  | + |
| CUST_2_PI426249100  | 0.005252 | 0.098602 | 46.25193 | up | coding | NM_017410_Exon2+   | NM_017410 | chr12 | + |
| CUST_27_PI426249100 | 0.001241 | 0.054115 | 2.825536 | up | coding | NM_002146_Exon2-   | NM_002146 | chr17 | - |
| CUST_30_PI426249100 | 0.000154 | 0.026643 | 2.766822 | up | coding | NM_024015_Exon1-   | NM_024015 | chr17 | - |
| CUST_38_PI426249100 | 0.029795 | 0.210837 | 3.25758  | up | coding | NM_004502_Exon1-   | NM_004502 | chr17 | - |
| CUST_39_PI426249100 | 0.006951 | 0.110944 | 7.729962 | up | coding | NM_024016_Exon2-   | NM_024016 | chr17 | - |
| CUST_41_PI426249100 | 0.012865 | 0.142939 | 71.33542 | up | coding | NM_024017_Exon2-   | NM_024017 | chr17 | - |
| CUST_6_PI426249100  | 0.009922 | 0.127353 | 15.32502 | up | coding | NM_014212_Exon2+   | NM_014212 | chr12 | + |
| CUST_7_PI426249100  | 0.001206 | 0.054115 | 2.360815 | up | coding | NM_017409_Exon1+   | NM_017409 | chr12 | + |
| CUST_84_PI426249100 | 0.015221 | 0.154966 | 3.363227 | up | coding | NM_006896_Exon1-   | NM_006896 | chr7  | - |

**Supplementary Table 1-2. The list of mRNAs downregulated in CRC.**

**P-value and FDR**                      **Fold change and Regulation**

| ProbeName       | p-value  | FDR      | FCAbsolute | regulation | type   | seqname      | GeneSymbol | chrom | strand |
|-----------------|----------|----------|------------|------------|--------|--------------|------------|-------|--------|
| ASHG19A3A000531 | 0.026609 | 0.199721 | 2.305781   | down       | coding | NM_000027    | AGA        | chr4  | -      |
| ASHG19A3A000539 | 0.000412 | 0.0346   | 31.79706   | down       | coding | NM_000088    | COL1A1     | chr17 | -      |
| ASHG19A3A000549 | 0.001109 | 0.05278  | 3.480583   | down       | coding | NM_000212    | ITGB3      | chr17 | +      |
| ASHG19A3A000567 | 0.02159  | 0.182328 | 2.097575   | down       | coding | NM_000366    | TPM1       | chr15 | +      |
| ASHG19A3A000572 | 0.036567 | 0.229691 | 2.426861   | down       | coding | NM_000380    | XPA        | chr9  | -      |
| ASHG19A3A000574 | 0.017217 | 0.164351 | 10.06112   | down       | coding | NM_000389    | CDKN1A     | chr6  | +      |
| ASHG19A3A000598 | 0.005774 | 0.101967 | 3.985405   | down       | coding | NM_000611    | CD59       | chr11 | -      |
| ASHG19A3A000608 | 0.024183 | 0.19176  | 2.747292   | down       | coding | NM_001006632 | CHRM2      | chr7  | +      |
| ASHG19A3A000628 | 0.013875 | 0.148967 | 2.213409   | down       | coding | NM_000919    | PAM        | chr5  | +      |
| ASHG19A3A000650 | 0.034062 | 0.222881 | 21.01558   | down       | coding | NM_001001389 | CD44       | chr11 | +      |
| ASHG19A3A000652 | 0.009469 | 0.124525 | 20.48569   | down       | coding | NM_001001391 | CD44       | chr11 | +      |
| ASHG19A3A000661 | 0.011815 | 0.137852 | 2.917001   | down       | coding | NM_001001486 | ATP2C1     | chr3  | +      |
| ASHG19A3A000693 | 0.000237 | 0.030336 | 7.630328   | down       | coding | NM_001001991 | PAMR1      | chr11 | -      |
| ASHG19A3A000724 | 0.002128 | 0.067702 | 2.582791   | down       | coding | NM_001002757 | NFU1       | chr2  | -      |
| ASHG19A3A000739 | 0.039298 | 0.236667 | 2.281184   | down       | coding | NM_001003398 | BICD1      | chr12 | +      |
| ASHG19A3A000773 | 0.002601 | 0.072555 | 5.813169   | down       | coding | NM_001004128 | QSOX1      | chr1  | +      |
| ASHG19A3A000795 | 0.020008 | 0.175921 | 4.991846   | down       | coding | NM_001005377 | PLAUR      | chr19 | -      |
| ASHG19A3A000808 | 0.012397 | 0.14047  | 2.495489   | down       | coding | NM_001005744 | NUMB       | chr14 | -      |
| ASHG19A3A000819 | 0.00257  | 0.072555 | 4.174943   | down       | coding | NM_001006613 | WBP5       | chrX  | +      |
| ASHG19A3A000822 | 0.018499 | 0.169813 | 2.593938   | down       | coding | NM_001006619 | MAPKAP1    | chr9  | -      |
| ASHG19A3A000836 | 0.001247 | 0.054115 | 5.83317    | down       | coding | NM_001006684 | TCEAL8     | chrX  | -      |
| ASHG19A3A000837 | 0.004014 | 0.087853 | 3.011917   | down       | coding | NM_001006933 | TCEAL3     | chrX  | +      |
| ASHG19A3A000843 | 0.015991 | 0.158497 | 2.089494   | down       | coding | NM_001007075 | KLHL5      | chr4  | +      |
| ASHG19A3A000865 | 0.006315 | 0.105194 | 6.387198   | down       | coding | NM_001007593 | SMPD1      | chr11 | +      |
| ASHG19A3A000868 | 0.000147 | 0.026643 | 3.347515   | down       | coding | NM_001008212 | OPTN       | chr10 | +      |
| ASHG19A3A000881 | 0.048908 | 0.262507 | 8.313128   | down       | coding | NM_001008660 | PICALM     | chr11 | -      |
| ASHG19A3A000910 | 0.033152 | 0.22014  | 3.067866   | down       | coding | NM_001009584 | ARMCX6     | chrX  | -      |
| ASHG19A3A000912 | 0.003984 | 0.087853 | 3.102782   | down       | coding | NM_001009813 | MEIS3      | chr19 | -      |
| ASHG19A3A000927 | 0.037526 | 0.232644 | 3.765482   | down       | coding | NM_001010935 | RAP1A      | chr1  | +      |

|                 |          |          |          |      |        |              |          |       |   |
|-----------------|----------|----------|----------|------|--------|--------------|----------|-------|---|
| ASHG19A3A000977 | 0.028397 | 0.206039 | 2.824109 | down | coding | NM_001012959 | DISC1    | chr1  | + |
| ASHG19A3A001043 | 0.029413 | 0.210017 | 3.176001 | down | coding | NM_001017977 | DCAF6    | chr1  | + |
| ASHG19A3A001047 | 0.000516 | 0.03796  | 6.209539 | down | coding | NM_001018005 | TPM1     | chr15 | + |
| ASHG19A3A001070 | 0.011604 | 0.136714 | 2.042806 | down | coding | NM_001018161 | PON2     | chr7  | - |
| ASHG19A3A001082 | 0.000385 | 0.034349 | 2.625202 | down | coding | NM_001024216 | FBLIM1   | chr1  | + |
| ASHG19A3A001091 | 0.01054  | 0.130758 | 6.28943  | down | coding | NM_001024629 | NRP1     | chr10 | - |
| ASHG19A3A001107 | 0.000882 | 0.048142 | 2.126548 | down | coding | NM_001024940 | TRIM17   | chr1  | - |
| ASHG19A3A001108 | 5.73E-05 | 0.02082  | 2.150347 | down | coding | NM_001024941 | TRIM17   | chr1  | - |
| ASHG19A3A001126 | 0.027294 | 0.201887 | 3.552508 | down | coding | NM_001025239 | TSPAN4   | chr11 | + |
| ASHG19A3A001162 | 0.000248 | 0.031123 | 212.8771 | down | coding | NM_001031692 | LRRC17   | chr7  | + |
| ASHG19A3A001249 | 0.019975 | 0.175878 | 7.863703 | down | coding | NM_001037171 | ACOT9    | chrX  | - |
| ASHG19A3A001277 | 0.012798 | 0.142578 | 2.69595  | down | coding | NM_001039132 | ICAM4    | chr19 | + |
| ASHG19A3A001279 | 0.011464 | 0.135767 | 4.525732 | down | coding | NM_001039349 | EFEMP1   | chr2  | - |
| ASHG19A3A001290 | 0.016358 | 0.15979  | 3.460564 | down | coding | NM_001039492 | FHL2     | chr2  | - |
| ASHG19A3A001305 | 0.001271 | 0.054115 | 6.887766 | down | coding | NM_001039667 | ANGPTL4  | chr19 | + |
| ASHG19A3A001332 | 0.00158  | 0.059794 | 11.59112 | down | coding | NM_001040059 | CD68     | chr17 | + |
| ASHG19A3A001337 | 0.048799 | 0.262417 | 3.824819 | down | coding | NM_001040101 | D4S234E  | chr4  | + |
| ASHG19A3A001392 | 0.003315 | 0.082717 | 3.201746 | down | coding | NM_001042370 | TROVE2   | chr1  | + |
| ASHG19A3A001450 | 0.000412 | 0.0346   | 4.606974 | down | coding | NM_001042678 | RHOC     | chr1  | - |
| ASHG19A3A001492 | 6.76E-05 | 0.022087 | 4.700281 | down | coding | NM_001077206 | SEC31A   | chr4  | - |
| ASHG19A3A001493 | 0.001574 | 0.059794 | 3.219818 | down | coding | NM_001077208 | SEC31A   | chr4  | - |
| ASHG19A3A001567 | 0.049019 | 0.262507 | 2.336605 | down | coding | NM_001079877 | RASA4    | chr7  | - |
| ASHG19A3A001670 | 2.07E-05 | 0.016153 | 6.415179 | down | coding | NM_001098484 | SLC4A4   | chr4  | + |
| ASHG19A3A001690 | 9.96E-05 | 0.023735 | 2.191135 | down | coding | NM_001098631 | IRF5     | chr7  | + |
| ASHG19A3A001734 | 0.019809 | 0.175242 | 2.275893 | down | coding | NM_001099627 | FAM54B   | chr1  | + |
| ASHG19A3A001777 | 0.004965 | 0.095751 | 2.76276  | down | coding | NM_001100408 | C17orf62 | chr17 | - |
| ASHG19A3A001796 | 0.00059  | 0.040703 | 9.35846  | down | coding | NM_174933    | PHYHD1   | chr9  | + |
| ASHG19A3A001800 | 0.046218 | 0.255615 | 10.30268 | down | coding | NM_001101314 | TMEM176B | chr7  | - |
| ASHG19A3A001808 | 0.038201 | 0.234141 | 2.379023 | down | coding | NM_001102    | ACTN1    | chr14 | - |
| ASHG19A3A001861 | 0.009424 | 0.124363 | 2.250302 | down | coding | NM_001109891 | MAPK3    | chr16 | - |

|                 |          |          |          |      |        |              |         |       |   |
|-----------------|----------|----------|----------|------|--------|--------------|---------|-------|---|
| ASHG19A3A001913 | 0.009945 | 0.127353 | 5.849105 | down | coding | NM_001114614 | MFGE8   | chr15 | - |
| ASHG19A3A001922 | 0.001321 | 0.055247 | 28.53532 | down | coding | NM_001114753 | ENG     | chr9  | - |
| ASHG19A3A001931 | 0.001859 | 0.063402 | 5.673208 | down | coding | NM_001118890 | GLRX    | chr5  | - |
| ASHG19A3A002006 | 0.001323 | 0.055247 | 11.66888 | down | coding | NM_001127383 | CYBRD1  | chr2  | + |
| ASHG19A3A002009 | 0.001853 | 0.063402 | 4.866179 | down | coding | NM_001127397 | ERLEC1  | chr2  | + |
| ASHG19A3A002010 | 0.044708 | 0.251624 | 2.200877 | down | coding | NM_001127398 | ERLEC1  | chr2  | + |
| ASHG19A3A002012 | 0.001989 | 0.065484 | 5.006525 | down | coding | NM_001127400 | YPEL5   | chr2  | + |
| ASHG19A3A002027 | 0.025282 | 0.19529  | 2.18103  | down | coding | NM_001127603 | C9orf95 | chr9  | - |
| ASHG19A3A002035 | 0.01586  | 0.157775 | 3.708894 | down | coding | NM_001127662 | GSN     | chr9  | + |
| ASHG19A3A002102 | 7.64E-07 | 0.00314  | 5.674217 | down | coding | NM_001128918 | MARK3   | chr14 | + |
| ASHG19A3A002131 | 0.001094 | 0.052579 | 7.583353 | down | coding | NM_001130004 | ACTN1   | chr14 | - |
| ASHG19A3A002132 | 4.41E-05 | 0.019118 | 9.600384 | down | coding | NM_001130005 | ACTN1   | chr14 | - |
| ASHG19A3A002227 | 0.003827 | 0.086652 | 36.4283  | down | coding | NM_001131027 | PDLIM4  | chr5  | + |
| ASHG19A3A002233 | 0.04884  | 0.262507 | 2.072203 | down | coding | NM_001131062 | SAP30L  | chr5  | + |
| ASHG19A3A002239 | 0.014749 | 0.15286  | 2.275162 | down | coding | NM_001134337 | RNF24   | chr20 | - |
| ASHG19A3A002340 | 0.010501 | 0.130705 | 4.167109 | down | coding | NM_001135670 | MSRA    | chr8  | + |
| ASHG19A3A002349 | 0.021958 | 0.183217 | 2.092853 | down | coding | NM_001135730 | TOM1    | chr22 | + |
| ASHG19A3A002356 | 0.032913 | 0.21918  | 4.110115 | down | coding | NM_001135753 | ECD     | chr10 | - |
| ASHG19A3A002367 | 0.031516 | 0.214448 | 2.889236 | down | coding | NM_001135911 | PIK3IP1 | chr22 | - |
| ASHG19A3A002484 | 0.012157 | 0.139449 | 2.892193 | down | coding | NM_001142293 | ARFGAP3 | chr22 | - |
| ASHG19A3A002511 | 2.97E-05 | 0.016153 | 2.102876 | down | coding | NM_001142402 | CD164   | chr6  | - |
| ASHG19A3A002512 | 0.003891 | 0.086787 | 3.094657 | down | coding | NM_001142403 | CD164   | chr6  | - |
| ASHG19A3A002542 | 0.038921 | 0.236253 | 2.394168 | down | coding | NM_001142478 | C5orf13 | chr5  | - |
| ASHG19A3A002583 | 0.001964 | 0.065007 | 4.905863 | down | coding | NM_001142598 | P4HA2   | chr5  | - |
| ASHG19A3A002584 | 0.003751 | 0.086142 | 2.366761 | down | coding | NM_001142599 | P4HA2   | chr5  | - |
| ASHG19A3A002591 | 0.000102 | 0.024093 | 31.40866 | down | coding | NM_001142625 | RAB34   | chr17 | - |
| ASHG19A3A002592 | 0.000173 | 0.026643 | 10.73948 | down | coding | NM_001144943 | RAB34   | chr17 | - |
| ASHG19A3A002627 | 0.043613 | 0.248281 | 9.660958 | down | coding | NM_001143805 | BDNF    | chr11 | - |
| ASHG19A3A002631 | 0.041241 | 0.24171  | 7.822183 | down | coding | NM_001143813 | BDNF    | chr11 | - |
| ASHG19A3A002632 | 0.011334 | 0.135345 | 8.704183 | down | coding | NM_001143814 | BDNF    | chr11 | - |
| ASHG19A3A002650 | 0.042055 | 0.244213 | 2.276582 | down | coding | NM_001143939 | ZNF534  | chr19 | + |

|                 |          |          |          |      |        |              |              |       |   |
|-----------------|----------|----------|----------|------|--------|--------------|--------------|-------|---|
| ASHG19A3A002655 | 0.045585 | 0.253981 | 5.049607 | down | coding | NM_001143958 | TMEM30A      | chr6  | - |
| ASHG19A3A002684 | 0.049877 | 0.264587 | 2.477092 | down | coding | NM_001144759 | PHLDB1       | chr11 | + |
| ASHG19A3A002728 | 5.02E-05 | 0.019284 | 24.81707 | down | coding | NM_001144942 | RAB34        | chr17 | - |
| ASHG19A3A002741 | 0.016324 | 0.1597   | 2.463701 | down | coding | NM_007048    | BTN3A1       | chr6  | + |
| ASHG19A3A002837 | 0.005886 | 0.10292  | 3.058259 | down | coding | NM_001145522 | RAI14        | chr5  | + |
| ASHG19A3A002843 | 0.022541 | 0.186    | 2.140244 | down | coding | NM_001145546 | GALP         | chr19 | + |
| ASHG19A3A002844 | 0.000501 | 0.037875 | 2.134732 | down | coding | NM_001145635 | TRIM45       | chr1  | - |
| ASHG19A3A002847 | 0.006318 | 0.105194 | 6.747529 | down | coding | NM_001145646 | APH1B        | chr15 | + |
| ASHG19A3A002869 | 0.001907 | 0.06357  | 3.044036 | down | coding | NM_001145812 | SH2B1        | chr16 | + |
| ASHG19A3A002887 | 0.026177 | 0.198323 | 4.272018 | down | coding | NM_001145961 | SLC12A4      | chr16 | - |
| ASHG19A3A002931 | 0.021641 | 0.182455 | 3.681581 | down | coding | NM_001146191 | MPZL1        | chr1  | + |
| ASHG19A3A003011 | 0.026572 | 0.199602 | 2.002648 | down | coding | NM_001159651 | BOD1         | chr5  | - |
| ASHG19A3A003015 | 0.000822 | 0.046841 | 16.50569 | down | coding | NM_001159703 | FHL1         | chrX  | + |
| ASHG19A3A003069 | 0.028832 | 0.207954 | 36.10538 | down | coding | NM_001160355 | LY6K         | chr8  | + |
| ASHG19A3A003073 | 0.024386 | 0.192472 | 2.597805 | down | coding | NM_001160408 | TULP3        | chr12 | + |
| ASHG19A3A003090 | 0.002454 | 0.071184 | 3.955037 | down | coding | NM_001161403 | LIMS2        | chr2  | - |
| ASHG19A3A003096 | 0.017693 | 0.16577  | 3.527165 | down | coding | NM_001161427 | ZNF610       | chr19 | + |
| ASHG19A3A003123 | 3.39E-05 | 0.016267 | 40.67369 | down | coding | NM_001161708 | SYNC         | chr1  | - |
| ASHG19A3A003198 | 0.034165 | 0.223249 | 3.519826 | down | coding | NM_001164189 | PLIN3        | chr19 | - |
| ASHG19A3A003199 | 0.02558  | 0.196543 | 3.883803 | down | coding | NM_001164194 | PLIN3        | chr19 | - |
| ASHG19A3A003224 | 0.037269 | 0.231712 | 5.67284  | down | coding | NM_001164468 | TMED7-TICAM2 | chr5  | - |
| ASHG19A3A003290 | 0.017282 | 0.164541 | 2.664423 | down | coding | NM_001165416 | LDHA         | chr11 | + |
| ASHG19A3A003333 | 0.002175 | 0.068508 | 2.425959 | down | coding | NM_001166059 | HMGCL        | chr1  | - |
| ASHG19A3A003360 | 0.012234 | 0.139627 | 25.51485 | down | coding | NM_001166266 | LTBP1        | chr2  | + |
| ASHG19A3A003385 | 0.002525 | 0.071931 | 3.619576 | down | coding | NM_001166460 | MPP1         | chrX  | - |
| ASHG19A3A003422 | 0.034428 | 0.224033 | 3.015539 | down | coding | NM_001167830 | TMED5        | chr1  | - |
| ASHG19A3A003429 | 0.000816 | 0.046841 | 6.957676 | down | coding | NM_001167903 | MFSD1        | chr3  | + |
| ASHG19A3A003433 | 0.022306 | 0.184784 | 9.945336 | down | coding | NM_001167917 | VEPH1        | chr3  | - |
| ASHG19A3A003437 | 0.007104 | 0.111447 | 3.360686 | down | coding | NM_001167935 | CCM2         | chr7  | + |
| ASHG19A3A003462 | 0.004904 | 0.094909 | 3.02152  | down | coding | NM_001168320 | TSPAN9       | chr12 | + |
| ASHG19A3A003483 | 0.0445   | 0.25113  | 2.176961 | down | coding | NM_001168412 | TSPAN3       | chr15 | - |
| ASHG19A3A003490 | 0.037695 | 0.233225 | 2.609728 | down | coding | NM_001168618 | IFT46        | chr11 | - |
| ASHG19A3A003516 | 0.001492 | 0.058762 | 2.015701 | down | coding | NM_001170687 | MIB2         | chr1  | + |

|                 |          |          |          |      |        |              |         |       |   |
|-----------------|----------|----------|----------|------|--------|--------------|---------|-------|---|
| ASHG19A3A003530 | 0.000617 | 0.041487 | 14.60176 | down | coding | NM_001170751 | SRPX    | chrX  | - |
| ASHG19A3A003531 | 0.003141 | 0.081034 | 15.54317 | down | coding | NM_006307    | SRPX    | chrX  | - |
| ASHG19A3A003532 | 0.003209 | 0.081674 | 14.84264 | down | coding | NM_001170752 | SRPX    | chrX  | - |
| ASHG19A3A003566 | 0.0068   | 0.109582 | 2.027544 | down | coding | NM_001171167 | CAMTA2  | chr17 | - |
| ASHG19A3A003581 | 0.037908 | 0.233598 | 5.829415 | down | coding | NM_001171510 | MCFD2   | chr2  | - |
| ASHG19A3A003582 | 0.031226 | 0.214234 | 2.883581 | down | coding | NM_001171511 | MCFD2   | chr2  | - |
| ASHG19A3A003591 | 0.00034  | 0.03301  | 5.356207 | down | coding | NM_001171654 | KLHL5   | chr4  | + |
| ASHG19A3A003604 | 0.025902 | 0.197747 | 3.716961 | down | coding | NM_001171812 | GBA     | chr1  | - |
| ASHG19A3A003623 | 0.011059 | 0.133589 | 2.043174 | down | coding | NM_001171988 | AGA     | chr4  | - |
| ASHG19A3A003683 | 0.028728 | 0.20736  | 2.937631 | down | coding | NM_001172702 | SLC38A6 | chr14 | + |
| ASHG19A3A003699 | 0.012539 | 0.141483 | 10.87711 | down | coding | NM_001172897 | CAV1    | chr7  | + |
| ASHG19A3A003720 | 0.008092 | 0.1174   | 2.683988 | down | coding | NM_001173525 | TROVE2  | chr1  | + |
| ASHG19A3A003731 | 0.038334 | 0.234613 | 2.885038 | down | coding | NM_001174052 | HYI     | chr1  | - |
| ASHG19A3A003734 | 0.045505 | 0.25388  | 4.137976 | down | coding | NM_001174063 | FGFR1   | chr8  | - |
| ASHG19A3A003736 | 0.042847 | 0.246455 | 5.897375 | down | coding | NM_001174065 | FGFR1   | chr8  | - |
| ASHG19A3A003851 | 0.008252 | 0.11845  | 23.85665 | down | coding | NM_001178134 | CXCL12  | chr10 | - |
| ASHG19A3A003870 | 0.033869 | 0.22223  | 2.27734  | down | coding | NM_001184720 | GYG1    | chr3  | + |
| ASHG19A3A003871 | 0.03646  | 0.229406 | 2.033449 | down | coding | NM_001184721 | GYG1    | chr3  | + |
| ASHG19A3A003879 | 0.010296 | 0.129259 | 25.88064 | down | coding | NM_001223    | CASP1   | chr11 | - |
| ASHG19A3A003897 | 0.011804 | 0.137852 | 2.863783 | down | coding | NM_001401    | LPAR1   | chr9  | - |
| ASHG19A3A003914 | 0.018771 | 0.170791 | 5.438047 | down | coding | NM_001535    | PRMT2   | chr21 | + |
| ASHG19A3A003929 | 0.003426 | 0.083068 | 4.832483 | down | coding | NM_001684    | ATP2B4  | chr1  | + |
| ASHG19A3A003961 | 0.018779 | 0.170791 | 6.349591 | down | coding | NM_001908    | CTSB    | chr8  | - |
| ASHG19A3A003977 | 0.001818 | 0.062815 | 154.0885 | down | coding | NM_002026    | FN1     | chr2  | - |
| ASHG19A3A003984 | 6.42E-05 | 0.021793 | 25.91413 | down | coding | NM_002101    | GYPC    | chr2  | + |
| ASHG19A3A004028 | 0.040312 | 0.239254 | 5.378469 | down | coding | NM_002414    | CD99    | chrY  | + |
| ASHG19A3A004060 | 0.046723 | 0.256751 | 25.38857 | down | coding | NM_002658    | PLAU    | chr10 | + |
| ASHG19A3A004079 | 0.024148 | 0.191712 | 4.269635 | down | coding | NM_001135648 | PTPRK   | chr6  | - |
| ASHG19A3A004101 | 0.00061  | 0.041299 | 2.237832 | down | coding | NM_003085    | SNCB    | chr5  | - |
| ASHG19A3A004112 | 0.000332 | 0.0328   | 35.95925 | down | coding | NM_003186    | TAGLN   | chr11 | + |
| ASHG19A3A004118 | 7.59E-05 | 0.023052 | 2.541747 | down | coding | NM_003238    | TGFB2   | chr1  | + |
| ASHG19A3A004144 | 0.005878 | 0.10292  | 4.386067 | down | coding | NM_003373    | VCL     | chr10 | + |
| ASHG19A3A004169 | 0.036447 | 0.229406 | 3.305577 | down | coding | NM_003638    | ITGA8   | chr10 | - |

|                 |          |          |          |      |        |           |         |       |   |
|-----------------|----------|----------|----------|------|--------|-----------|---------|-------|---|
| ASHG19A3A004170 | 0.006728 | 0.108842 | 2.454407 | down | coding | NM_003652 | CPZ     | chr4  | + |
| ASHG19A3A004186 | 0.031212 | 0.214234 | 2.429645 | down | coding | NM_003778 | B4GALT4 | chr3  | - |
| ASHG19A3A004203 | 0.043559 | 0.248267 | 3.815521 | down | coding | NM_003879 | CFLAR   | chr2  | + |
| ASHG19A3A004240 | 0.001834 | 0.063244 | 4.804994 | down | coding | NM_004130 | GYG1    | chr3  | + |
| ASHG19A3A004298 | 0.002961 | 0.079219 | 6.749077 | down | coding | NM_004509 | SP110   | chr2  | - |
| ASHG19A3A004310 | 0.037109 | 0.23155  | 2.148936 | down | coding | NM_004587 | RRBP1   | chr20 | - |
| ASHG19A3A004335 | 0.008187 | 0.118059 | 5.352974 | down | coding | NM_004834 | MAP4K4  | chr2  | + |
| ASHG19A3A004345 | 0.001861 | 0.063402 | 6.713923 | down | coding | NM_004901 | ENTPD4  | chr8  | - |
| ASHG19A3A004346 | 9.88E-05 | 0.023735 | 4.124887 | down | coding | NM_004918 | TCL1B   | chr14 | + |
| ASHG19A3A004369 | 0.045236 | 0.253239 | 4.643989 | down | coding | NM_005112 | WDR1    | chr4  | - |
| ASHG19A3A004370 | 0.032537 | 0.217592 | 2.283755 | down | coding | NM_005115 | MVP     | chr16 | + |
| ASHG19A3A004422 | 0.010029 | 0.127474 | 4.053011 | down | coding | NM_005637 | SS18    | chr18 | - |
| ASHG19A3A004465 | 0.02146  | 0.182093 | 2.690771 | down | coding | NM_006084 | IRF9    | chr14 | + |
| ASHG19A3A004476 | 0.006172 | 0.104341 | 2.487177 | down | coding | NM_006182 | DDR2    | chr1  | + |
| ASHG19A3A004520 | 0.000754 | 0.045177 | 6.217709 | down | coding | NM_006549 | CAMKK2  | chr12 | - |
| ASHG19A3A004552 | 0.007115 | 0.111447 | 2.196536 | down | coding | NM_006812 | OS9     | chr12 | + |
| ASHG19A3A004556 | 0.044218 | 0.250152 | 2.43952  | down | coding | NM_006870 | DSTN    | chr20 | + |
| ASHG19A3A004565 | 0.021241 | 0.180917 | 3.08792  | down | coding | NM_006932 | SMTN    | chr22 | + |
| ASHG19A3A004566 | 0.000253 | 0.031138 | 2.893527 | down | coding | NM_006934 | SLC6A9  | chr1  | - |
| ASHG19A3A004577 | 0.042192 | 0.244591 | 3.060939 | down | coding | NM_007049 | BTN2A1  | chr6  | + |
| ASHG19A3A004643 | 0.014956 | 0.153769 | 2.941938 | down | coding | NM_012263 | TLL1    | chr22 | - |
| ASHG19A3A004682 | 0.000365 | 0.03424  | 659.5348 | down | coding | NM_013409 | FST     | chr5  | + |
| ASHG19A3A004691 | 0.033264 | 0.22065  | 4.057472 | down | coding | NM_013962 | NRG1    | chr8  | + |
| ASHG19A3A004716 | 0.034326 | 0.223834 | 3.345204 | down | coding | NM_014247 | RAPGEF2 | chr4  | + |
| ASHG19A3A004749 | 0.028649 | 0.207188 | 3.12919  | down | coding | NM_014622 | VWA5A   | chr11 | + |
| ASHG19A3A004795 | 0.008674 | 0.12046  | 11.47749 | down | coding | NM_015129 | SEPT6   | chrX  | - |
| ASHG19A3A004802 | 0.040429 | 0.239593 | 2.27858  | down | coding | NM_015219 | EXOC7   | chr17 | - |
| ASHG19A3A004819 | 0.0119   | 0.138338 | 3.083796 | down | coding | NM_015435 | RNF19A  | chr8  | - |
| ASHG19A3A004828 | 0.009373 | 0.124218 | 4.314774 | down | coding | NM_015543 | RAB1A   | chr2  | - |
| ASHG19A3A004841 | 0.021485 | 0.182093 | 2.858539 | down | coding | NM_015834 | ADARB1  | chr21 | + |
| ASHG19A3A004843 | 0.000417 | 0.034737 | 9.422303 | down | coding | NM_015837 | FCN2    | chr9  | + |
| ASHG19A3A004856 | 0.019816 | 0.175242 | 2.125991 | down | coding | NM_015927 | TGFB111 | chr16 | + |
| ASHG19A3A004865 | 0.001034 | 0.051638 | 4.141249 | down | coding | NM_016061 | YPEL5   | chr2  | + |

|                 |          |          |          |      |        |              |          |       |   |
|-----------------|----------|----------|----------|------|--------|--------------|----------|-------|---|
| ASHG19A3A004869 | 2.31E-05 | 0.016153 | 3.127298 | down | coding | NM_016102    | TRIM17   | chr1  | - |
| ASHG19A3A004879 | 0.001147 | 0.053318 | 2.901935 | down | coding | NM_001077207 | SEC31A   | chr4  | - |
| ASHG19A3A004922 | 1.49E-05 | 0.01403  | 42.43371 | down | coding | NM_016815    | GYPC     | chr2  | + |
| ASHG19A3A004947 | 0.041447 | 0.242101 | 41.47807 | down | coding | NM_017527    | LY6K     | chr8  | + |
| ASHG19A3A005022 | 0.021721 | 0.182528 | 2.529476 | down | coding | NM_018300    | ZNF83    | chr19 | - |
| ASHG19A3A005085 | 0.005046 | 0.096477 | 2.412047 | down | coding | NM_018925    | PCDHGB5  | chr5  | + |
| ASHG19A3A005141 | 0.013864 | 0.148967 | 3.343376 | down | coding | NM_020351    | COL8A1   | chr3  | + |
| ASHG19A3A005144 | 0.001357 | 0.055969 | 4.064954 | down | coding | NM_020372    | SLC22A17 | chr14 | - |
| ASHG19A3A005146 | 0.008532 | 0.120074 | 4.598991 | down | coding | NM_020403    | PCDH9    | chr13 | - |
| ASHG19A3A005188 | 0.00039  | 0.034493 | 4.595431 | down | coding | NM_021019    | MYL6     | chr12 | + |
| ASHG19A3A005241 | 0.019752 | 0.175242 | 2.109042 | down | coding | NM_021971    | GMPPB    | chr3  | - |
| ASHG19A3A005243 | 0.004171 | 0.088853 | 4.849791 | down | coding | NM_021980    | OPTN     | chr10 | + |
| ASHG19A3A005273 | 0.000483 | 0.037875 | 5.190498 | down | coding | NM_022470    | ZMAT3    | chr3  | - |
| ASHG19A3A005296 | 0.006088 | 0.103718 | 27.11313 | down | coding | NM_022664    | ECM1     | chr1  | + |
| ASHG19A3A005297 | 0.030031 | 0.211497 | 3.673279 | down | coding | NM_022716    | PRRX1    | chr1  | + |
| ASHG19A3A005328 | 0.032254 | 0.216971 | 6.863965 | down | coding | NM_023111    | FGFR1    | chr8  | - |
| ASHG19A3A005401 | 0.000499 | 0.037875 | 2.260291 | down | coding | NM_025188    | TRIM45   | chr1  | - |
| ASHG19A3A005427 | 0.044934 | 0.252599 | 2.84037  | down | coding | NM_030799    | YIPF5    | chr5  | - |
| ASHG19A3A005446 | 0.031365 | 0.214234 | 3.158461 | down | coding | NM_031207    | HYI      | chr1  | - |
| ASHG19A3A005495 | 0.01727  | 0.164505 | 2.150209 | down | coding | NM_032092    | PCDHGA11 | chr5  | + |
| ASHG19A3A005528 | 0.041606 | 0.242668 | 2.10374  | down | coding | NM_032493    | AP1M1    | chr19 | + |
| ASHG19A3A005554 | 0.004899 | 0.094909 | 2.915178 | down | coding | NM_032926    | TCEAL3   | chrX  | + |
| ASHG19A3A005575 | 0.00193  | 0.064229 | 7.911408 | down | coding | NM_033011    | PLAT     | chr8  | - |
| ASHG19A3A005591 | 0.041555 | 0.24258  | 2.976769 | down | coding | NM_033140    | CALD1    | chr7  | + |
| ASHG19A3A005598 | 0.001222 | 0.054115 | 20.13387 | down | coding | NM_033157    | CALD1    | chr7  | + |
| ASHG19A3A005626 | 0.005239 | 0.098531 | 36.19259 | down | coding | NM_033293    | CASP1    | chr11 | - |
| ASHG19A3A005699 | 0.006464 | 0.106393 | 6.495205 | down | coding | NM_057167    | COL6A3   | chr2  | - |
| ASHG19A3A005704 | 0.022457 | 0.185503 | 7.01231  | down | coding | NM_057177    | PARD3B   | chr2  | + |
| ASHG19A3A005706 | 0.000284 | 0.031138 | 11.34688 | down | coding | NM_058174    | COL6A2   | chr21 | + |
| ASHG19A3A005715 | 8.99E-05 | 0.023512 | 2.90194  | down | coding | NM_079423    | MYL6     | chr12 | + |
| ASHG19A3A005723 | 0.00597  | 0.103105 | 3.153562 | down | coding | NM_080591    | PTGS1    | chr9  | + |
| ASHG19A3A005746 | 0.01283  | 0.142711 | 2.337496 | down | coding | NM_080799    | COL13A1  | chr10 | + |
| ASHG19A3A005748 | 0.013874 | 0.148967 | 4.483092 | down | coding | NM_080809    | COL13A1  | chr10 | + |



|                 |          |          |          |      |        |           |          |       |   |
|-----------------|----------|----------|----------|------|--------|-----------|----------|-------|---|
| ASHG19A3A005750 | 0.010958 | 0.133053 | 6.835329 | down | coding | NM_080808 | COL13A1  | chr10 | + |
| ASHG19A3A005751 | 0.037306 | 0.231823 | 12.42996 | down | coding | NM_080805 | COL13A1  | chr10 | + |
| ASHG19A3A005815 | 0.005143 | 0.097444 | 2.013869 | down | coding | NM_133499 | SYN1     | chrX  | - |
| ASHG19A3A005817 | 0.003113 | 0.080651 | 6.055458 | down | coding | NM_133505 | DCN      | chr12 | - |
| ASHG19A3A005829 | 0.014201 | 0.150411 | 2.984505 | down | coding | NM_134270 | SMTN     | chr22 | + |
| ASHG19A3A005898 | 0.014344 | 0.151394 | 2.514854 | down | coding | NM_138822 | PAM      | chr5  | + |
| ASHG19A3A005972 | 0.01281  | 0.142578 | 2.861229 | down | coding | NM_144657 | HDX      | chrX  | - |
| ASHG19A3A006049 | 0.010889 | 0.133053 | 2.579122 | down | coding | NM_145893 | A2BP1    | chr16 | + |
| ASHG19A3A006054 | 0.009294 | 0.123519 | 8.04499  | down | coding | NM_145918 | CTSL1    | chr9  | + |
| ASHG19A3A006056 | 0.008    | 0.117056 | 8.060528 | down | coding | NM_146421 | GSTM1    | chr1  | + |
| ASHG19A3A006067 | 0.003795 | 0.086533 | 4.084881 | down | coding | NM_147184 | TP53I3   | chr2  | - |
| ASHG19A3A006072 | 0.005603 | 0.100699 | 6.3216   | down | coding | NM_147783 | CTSB     | chr8  | - |
| ASHG19A3A006144 | 0.007768 | 0.116658 | 2.459313 | down | coding | NM_152526 | PARD3B   | chr2  | + |
| ASHG19A3A006157 | 0.004557 | 0.093019 | 3.603573 | down | coding | NM_152724 | RSU1     | chr10 | - |
| ASHG19A3A006182 | 0.009649 | 0.125668 | 2.069171 | down | coding | NM_152862 | ARPC2    | chr2  | + |
| ASHG19A3A006259 | 0.013473 | 0.14683  | 4.254257 | down | coding | NM_153828 | RTN4     | chr2  | - |
| ASHG19A3A006271 | 0.002454 | 0.071184 | 3.722906 | down | coding | NM_170707 | LMNA     | chr1  | + |
| ASHG19A3A006272 | 0.003437 | 0.083068 | 4.629408 | down | coding | NM_170708 | LMNA     | chr1  | + |
| ASHG19A3A006384 | 0.000657 | 0.042525 | 2.890698 | down | coding | NM_173573 | C11orf35 | chr11 | - |
| ASHG19A3A006404 | 0.038001 | 0.233813 | 5.288932 | down | coding | NM_174908 | CCDC50   | chr3  | + |
| ASHG19A3A006414 | 0.017051 | 0.163455 | 3.373326 | down | coding | NM_174970 | ST3GAL3  | chr1  | + |
| ASHG19A3A006449 | 0.026189 | 0.198323 | 2.038001 | down | coding | NM_177414 | PPAP2B   | chr1  | - |
| ASHG19A3A006453 | 0.045163 | 0.253128 | 2.664426 | down | coding | NM_177452 | TRAPPC6B | chr14 | - |
| ASHG19A3A006492 | 7.91E-05 | 0.023121 | 11.31036 | down | coding | NM_178237 | EXOC1    | chr4  | + |
| ASHG19A3A006493 | 0.000598 | 0.040795 | 2.87017  | down | coding | NM_178270 | ATG4A    | chrX  | + |
| ASHG19A3A006511 | 0.042232 | 0.244591 | 2.34446  | down | coding | NM_178586 | PPP2R5C  | chr14 | + |
| ASHG19A3A006517 | 0.00114  | 0.053195 | 3.560237 | down | coding | NM_181042 | PBRM1    | chr3  | - |
| ASHG19A3A006556 | 0.001109 | 0.05278  | 29.30474 | down | coding | NM_181526 | MYL9     | chr20 | + |
| ASHG19A3A006574 | 0.03753  | 0.232644 | 3.802182 | down | coding | NM_181702 | GEM      | chr8  | - |
| ASHG19A3A006577 | 0.01524  | 0.154966 | 4.156525 | down | coding | NM_181742 | ORC4L    | chr2  | - |
| ASHG19A3A006579 | 0.033873 | 0.22223  | 2.44847  | down | coding | NM_181762 | UBE2A    | chrX  | + |
| ASHG19A3A006585 | 0.00115  | 0.053318 | 20.08444 | down | coding | NM_181804 | PKIG     | chr20 | + |
| ASHG19A3A006628 | 0.006573 | 0.107446 | 2.394681 | down | coding | NM_182720 | CREM     | chr10 | + |

|                 |          |          |          |      |        |              |           |       |   |
|-----------------|----------|----------|----------|------|--------|--------------|-----------|-------|---|
| ASHG19A3A006630 | 0.003684 | 0.085124 | 2.805205 | down | coding | NM_182724    | CREM      | chr10 | + |
| ASHG19A3A006632 | 0.00159  | 0.059794 | 2.430909 | down | coding | NM_182725    | CREM      | chr10 | + |
| ASHG19A3A006647 | 0.010922 | 0.133053 | 15.66122 | down | coding | NM_182826    | SCARA3    | chr8  | + |
| ASHG19A3A006653 | 0.009444 | 0.124367 | 2.481383 | down | coding | NM_182853    | CREM      | chr10 | + |
| ASHG19A3A006658 | 0.016039 | 0.158564 | 2.271683 | down | coding | NM_182923    | KLC1      | chr14 | + |
| ASHG19A3A006666 | 0.0475   | 0.259505 | 3.403597 | down | coding | NM_183013    | CREM      | chr10 | + |
| ASHG19A3A006695 | 0.003048 | 0.080155 | 2.458052 | down | coding | NM_183421    | FBXO25    | chr8  | + |
| ASHG19A3A006717 | 0.006657 | 0.108511 | 2.168675 | down | coding | NM_194447    | CLEC4A    | chr12 | + |
| ASHG19A3A006735 | 0.012966 | 0.143459 | 5.941242 | down | coding | NM_198042    | PDLIM2    | chr8  | + |
| ASHG19A3A006768 | 0.002883 | 0.078019 | 4.105012 | down | coding | NM_198252    | GSN       | chr9  | + |
| ASHG19A3A006795 | 0.029396 | 0.210017 | 7.541676 | down | coding | NM_198530    | MXRA7     | chr17 | - |
| ASHG19A3A006826 | 0.014364 | 0.151394 | 3.391866 | down | coding | NM_198902    | TSPAN3    | chr15 | - |
| ASHG19A3A006838 | 0.00342  | 0.083068 | 2.352755 | down | coding | NM_199039    | KLHL5     | chr4  | + |
| ASHG19A3A006926 | 0.024564 | 0.19336  | 2.784067 | down | coding | NM_201555    | FHL2      | chr2  | - |
| ASHG19A3A006934 | 0.036549 | 0.229691 | 10.56163 | down | coding | NM_201612    | IKBIP     | chr12 | - |
| ASHG19A3A006935 | 0.027676 | 0.203194 | 4.810045 | down | coding | NM_201613    | IKBIP     | chr12 | - |
| ASHG19A3A006939 | 0.010199 | 0.128875 | 2.622002 | down | coding | NM_201629    | TJP2      | chr9  | + |
| ASHG19A3A007052 | 0.002386 | 0.070943 | 6.513905 | down | coding | NM_207520    | RTN4      | chr2  | - |
| ASHG19A3A007058 | 4.33E-05 | 0.019118 | 123.8474 | down | coding | NM_212476    | FN1       | chr2  | - |
| ASHG19A3A007059 | 0.001475 | 0.058344 | 144.7683 | down | coding | NM_212474    | FN1       | chr2  | - |
| ASHG19A3A007060 | 0.000705 | 0.044249 | 61.48272 | down | coding | NM_212475    | FN1       | chr2  | - |
| ASHG19A3A007069 | 0.004103 | 0.088276 | 3.282084 | down | coding | NM_213633    | PSG4      | chr19 | - |
| ASHG19A3A007077 | 0.001197 | 0.054008 | 4.231897 | down | coding | NM_213662    | STAT3     | chr17 | - |
| ASHG19A3A007817 | 0.027024 | 0.201258 | 2.173487 | down | coding | NM_016041    | DERL2     | chr17 | - |
| ASHG19A3A007818 | 0.002451 | 0.071184 | 13.58645 | down | coding | NM_001162371 | LOC728392 | chr17 | - |
| ASHG19A3A007819 | 0.006451 | 0.106376 | 17.6815  | down | coding | NM_001033053 | NLRP1     | chr17 | - |
| ASHG19A3A007820 | 0.00465  | 0.093229 | 2.681735 | down | coding | NM_033004    | NLRP1     | chr17 | - |
| ASHG19A3A007841 | 0.009238 | 0.123125 | 2.037341 | down | coding | NM_007278    | GABARAP   | chr17 | - |
| ASHG19A3A007847 | 0.010401 | 0.129921 | 2.304603 | down | coding | NM_020360    | PLSCR3    | chr17 | - |
| ASHG19A3A007919 | 0.005683 | 0.101251 | 3.277786 | down | coding | NM_003762    | VAMP4     | chr1  | - |
| ASHG19A3A008044 | 0.037261 | 0.231712 | 60.16317 | down | coding | NM_002404    | MFAP4     | chr17 | - |
| ASHG19A3A008090 | 0.022816 | 0.186813 | 3.484636 | down | coding | NM_001076680 | C17orf108 | chr17 | - |
| ASHG19A3A008116 | 0.001218 | 0.054115 | 7.788506 | down | coding | NM_031934    | RAB34     | chr17 | - |

|                 |          |          |          |      |        |              |          |       |   |
|-----------------|----------|----------|----------|------|--------|--------------|----------|-------|---|
| ASHG19A3A008135 | 0.012184 | 0.139449 | 2.437201 | down | coding | NM_032854    | CORO6    | chr17 | - |
| ASHG19A3A008255 | 0.027142 | 0.201378 | 4.172089 | down | coding | NM_199248    | CACNB1   | chr17 | - |
| ASHG19A3A008306 | 0.004027 | 0.087853 | 107.9669 | down | coding | NM_031957    | KRTAP1-5 | chr17 | - |
| ASHG19A3A008369 | 8.48E-05 | 0.023249 | 6.368273 | down | coding | NM_012232    | PTRF     | chr17 | - |
| ASHG19A3A008382 | 0.006794 | 0.109582 | 3.194623 | down | coding | NM_006373    | VAT1     | chr17 | - |
| ASHG19A3A008404 | 0.025804 | 0.197501 | 2.740719 | down | coding | NM_001015053 | HDAC5    | chr17 | - |
| ASHG19A3A008495 | 0.002285 | 0.069865 | 37.67219 | down | coding | NM_016429    | COPZ2    | chr17 | - |
| ASHG19A3A008604 | 0.02907  | 0.208902 | 10.09351 | down | coding | NM_001085430 | C17orf67 | chr17 | - |
| ASHG19A3A008680 | 0.00026  | 0.031138 | 2.881401 | down | coding | NM_152598    | MARCH10  | chr17 | - |
| ASHG19A3A008688 | 0.035637 | 0.227147 | 2.233428 | down | coding | NM_030576    | LIMD2    | chr17 | - |
| ASHG19A3A008727 | 0.009151 | 0.122749 | 2.164647 | down | coding | NM_145036    | CCDC46   | chr17 | - |
| ASHG19A3A008739 | 0.007947 | 0.117056 | 4.687761 | down | coding | NM_017983    | WIPI1    | chr17 | - |
| ASHG19A3A008778 | 0.009674 | 0.12579  | 2.06513  | down | coding | NM_005717    | ARPC5    | chr1  | - |
| ASHG19A3A008821 | 0.005028 | 0.09622  | 103.6854 | down | coding | NM_134268    | CYGB     | chr17 | - |
| ASHG19A3A008824 | 0.009752 | 0.126475 | 12.86157 | down | coding | NM_001008528 | MXRA7    | chr17 | - |
| ASHG19A3A008825 | 0.00139  | 0.056547 | 7.303493 | down | coding | NM_001008529 | MXRA7    | chr17 | - |
| ASHG19A3A008837 | 0.01417  | 0.150369 | 5.322567 | down | coding | NM_052966    | FAM129A  | chr1  | - |
| ASHG19A3A008851 | 0.028101 | 0.204801 | 9.432339 | down | coding | NM_003255    | TIMP2    | chr17 | - |
| ASHG19A3A008867 | 0.014862 | 0.153272 | 6.508284 | down | coding | NM_000199    | SGSH     | chr17 | - |
| ASHG19A3A008872 | 9.79E-05 | 0.023735 | 26.48601 | down | coding | NM_002522    | NPTX1    | chr17 | - |
| ASHG19A3A008938 | 0.019785 | 0.175242 | 2.796598 | down | coding | NM_001013672 | C17orf97 | chr17 | + |
| ASHG19A3A008994 | 0.000325 | 0.032699 | 2.059646 | down | coding | NM_153827    | MINK1    | chr17 | + |
| ASHG19A3A009040 | 0.017693 | 0.16577  | 3.08232  | down | coding | NM_001002914 | KCTD11   | chr17 | + |
| ASHG19A3A009044 | 0.002776 | 0.076098 | 2.990414 | down | coding | NM_020795    | NLGN2    | chr17 | + |
| ASHG19A3A009055 | 0.036027 | 0.228089 | 3.900542 | down | coding | NM_003809    | TNFSF12  | chr17 | + |
| ASHG19A3A009167 | 0.011331 | 0.135345 | 39.33126 | down | coding | NM_016113    | TRPV2    | chr17 | + |
| ASHG19A3A009178 | 0.000364 | 0.03424  | 11.79803 | down | coding | NM_201274    | MPRIIP   | chr17 | + |
| ASHG19A3A009229 | 0.025638 | 0.196745 | 8.831364 | down | coding | NM_007148    | RNF112   | chr17 | + |
| ASHG19A3A009408 | 0.008494 | 0.11964  | 3.336082 | down | coding | NM_144975    | SLFN5    | chr17 | + |
| ASHG19A3A009520 | 0.046242 | 0.255677 | 5.299121 | down | coding | NM_021939    | FKBP10   | chr17 | + |
| ASHG19A3A009558 | 0.018086 | 0.167574 | 5.31906  | down | coding | NM_145041    | TMEM106A | chr17 | + |
| ASHG19A3A009579 | 0.01741  | 0.164752 | 7.167451 | down | coding | NM_001466    | FZD2     | chr17 | + |
| ASHG19A3A009634 | 0.009937 | 0.127353 | 2.131162 | down | coding | NM_002476    | MYL4     | chr17 | + |

|                 |          |          |          |      |        |              |          |       |   |
|-----------------|----------|----------|----------|------|--------|--------------|----------|-------|---|
| ASHG19A3A009692 | 0.018561 | 0.170069 | 4.88143  | down | coding | NM_012396    | PHLDA3   | chr1  | - |
| ASHG19A3A009696 | 0.00848  | 0.11964  | 5.30156  | down | coding | NM_004078    | CSRP1    | chr1  | - |
| ASHG19A3A009758 | 0.042967 | 0.246559 | 2.109199 | down | coding | NM_021626    | SCPEP1   | chr17 | + |
| ASHG19A3A009834 | 0.037179 | 0.23155  | 3.299728 | down | coding | NM_001165933 | RGS9     | chr17 | + |
| ASHG19A3A009875 | 0.005499 | 0.100265 | 2.944492 | down | coding | NM_016243    | CYB5R1   | chr1  | - |
| ASHG19A3A010036 | 0.039888 | 0.238303 | 6.385339 | down | coding | NM_002256    | KISS1    | chr1  | - |
| ASHG19A3A010059 | 0.017967 | 0.167125 | 8.740057 | down | coding | NM_031945    | TSPAN10  | chr17 | + |
| ASHG19A3A010209 | 0.010597 | 0.131205 | 9.047874 | down | coding | NM_015461    | ZNF521   | chr18 | - |
| ASHG19A3A010230 | 0.049603 | 0.263911 | 3.599188 | down | coding | NM_001034172 | MCART2   | chr18 | - |
| ASHG19A3A010308 | 0.002443 | 0.071184 | 3.797999 | down | coding | NM_005904    | SMAD7    | chr18 | - |
| ASHG19A3A010312 | 0.029888 | 0.211279 | 2.03905  | down | coding | NM_001035005 | C18orf32 | chr18 | - |
| ASHG19A3A010314 | 0.046061 | 0.255048 | 2.457366 | down | coding | NM_006111    | ACAA2    | chr18 | - |
| ASHG19A3A010332 | 0.048048 | 0.260925 | 6.435903 | down | coding | NM_025214    | CCDC68   | chr18 | - |
| ASHG19A3A010343 | 0.02982  | 0.210877 | 3.790347 | down | coding | NM_005603    | ATP8B1   | chr18 | - |
| ASHG19A3A010344 | 0.001663 | 0.060728 | 10.16335 | down | coding | NM_052947    | ALPK2    | chr18 | - |
| ASHG19A3A010473 | 0.012493 | 0.141052 | 4.628383 | down | coding | NM_020648    | TWSG1    | chr18 | + |
| ASHG19A3A010476 | 0.006495 | 0.10645  | 35.61887 | down | coding | NM_006868    | RAB31    | chr18 | + |
| ASHG19A3A010496 | 0.027087 | 0.201258 | 49.70506 | down | coding | NM_032525    | TUBB6    | chr18 | + |
| ASHG19A3A010506 | 0.004666 | 0.093229 | 3.07678  | down | coding | NM_004338    | C18orf1  | chr18 | + |
| ASHG19A3A010627 | 0.031444 | 0.214448 | 4.069867 | down | coding | NM_213602    | SIGLEC15 | chr18 | + |
| ASHG19A3A010658 | 0.043604 | 0.248281 | 2.263149 | down | coding | NM_018696    | ELAC1    | chr18 | + |
| ASHG19A3A010726 | 0.002284 | 0.069865 | 4.045822 | down | coding | NM_002640    | SERPINB8 | chr18 | + |
| ASHG19A3A010844 | 0.000308 | 0.032613 | 2.690858 | down | coding | NM_130807    | MOBKL2A  | chr19 | - |
| ASHG19A3A010883 | 0.02108  | 0.180033 | 2.762917 | down | coding | NM_001348    | DAPK3    | chr19 | - |
| ASHG19A3A010894 | 0.030974 | 0.213821 | 2.141259 | down | coding | NM_003025    | SH3GL1   | chr19 | - |
| ASHG19A3A011028 | 0.03166  | 0.214929 | 3.962841 | down | coding | NM_004230    | S1PR2    | chr19 | - |
| ASHG19A3A011110 | 0.001189 | 0.054008 | 2.453898 | down | coding | NM_005583    | LYL1     | chr19 | - |
| ASHG19A3A011138 | 0.00337  | 0.083054 | 2.73141  | down | coding | NM_000955    | PTGER1   | chr19 | - |
| ASHG19A3A011155 | 0.029041 | 0.208902 | 13.78169 | down | coding | NM_000435    | NOTCH3   | chr19 | - |
| ASHG19A3A011270 | 0.008577 | 0.120291 | 11.06998 | down | coding | NM_001076675 | ZNF626   | chr19 | - |
| ASHG19A3A011365 | 1E-06    | 0.00314  | 4.554074 | down | coding | NM_144617    | HSPB6    | chr19 | - |
| ASHG19A3A011376 | 0.000238 | 0.030336 | 43.38205 | down | coding | NM_015526    | CLIP3    | chr19 | - |
| ASHG19A3A011378 | 0.032665 | 0.218293 | 2.756272 | down | coding | NM_152658    | THAP8    | chr19 | - |

|                 |          |          |          |      |        |              |          |       |   |
|-----------------|----------|----------|----------|------|--------|--------------|----------|-------|---|
| ASHG19A3A011385 | 0.000242 | 0.030597 | 5.577766 | down | coding | NM_133466    | ZFP82    | chr19 | - |
| ASHG19A3A011465 | 0.00038  | 0.034338 | 2.204905 | down | coding | NM_013376    | SERTAD1  | chr19 | - |
| ASHG19A3A011495 | 0.00901  | 0.122111 | 3.234762 | down | coding | NM_006423    | RABAC1   | chr19 | - |
| ASHG19A3A011498 | 0.003078 | 0.080399 | 8.708505 | down | coding | NM_002698    | POU2F2   | chr19 | - |
| ASHG19A3A011516 | 0.006304 | 0.105194 | 10.80094 | down | coding | NM_006905    | PSG1     | chr19 | - |
| ASHG19A3A011539 | 0.014148 | 0.150369 | 3.764416 | down | coding | NM_002659    | PLAUR    | chr19 | - |
| ASHG19A3A011546 | 0.02851  | 0.206341 | 20.32427 | down | coding | NM_001033719 | ZNF404   | chr19 | - |
| ASHG19A3A011617 | 0.026452 | 0.19886  | 17.71914 | down | coding | NM_145056    | DACT3    | chr19 | - |
| ASHG19A3A011693 | 0.00646  | 0.106393 | 5.682001 | down | coding | NM_006270    | RRAS     | chr19 | - |
| ASHG19A3A011739 | 0.000972 | 0.050297 | 2.85617  | down | coding | NM_001136032 | KLK11    | chr19 | - |
| ASHG19A3A011854 | 0.006158 | 0.104193 | 3.798362 | down | coding | NM_145057    | CDC42EP5 | chr19 | - |
| ASHG19A3A011877 | 0.032415 | 0.217006 | 10.93533 | down | coding | NM_000641    | IL11     | chr19 | - |
| ASHG19A3A011896 | 0.001285 | 0.054217 | 6.921976 | down | coding | NM_144690    | ZNF582   | chr19 | - |
| ASHG19A3A011919 | 0.005416 | 0.099571 | 38.5892  | down | coding | NM_024833    | ZNF671   | chr19 | - |
| ASHG19A3A011969 | 0.023459 | 0.189502 | 4.216163 | down | coding | NM_005860    | FSTL3    | chr19 | + |
| ASHG19A3A011982 | 0.015774 | 0.157754 | 3.654412 | down | coding | NM_138690    | GRIN3B   | chr19 | + |
| ASHG19A3A012162 | 0.004731 | 0.093712 | 4.080854 | down | coding | NM_139314    | ANGPTL4  | chr19 | + |
| ASHG19A3A012200 | 0.003497 | 0.083478 | 4.423962 | down | coding | NM_001544    | ICAM4    | chr19 | + |
| ASHG19A3A012237 | 0.004576 | 0.093019 | 65.87797 | down | coding | NM_001299    | CNN1     | chr19 | + |
| ASHG19A3A012271 | 0.008049 | 0.117056 | 2.797067 | down | coding | NM_153358    | ZNF791   | chr19 | + |
| ASHG19A3A012323 | 0.010132 | 0.128321 | 25.87463 | down | coding | NM_033025    | SYDE1    | chr19 | + |
| ASHG19A3A012407 | 0.044104 | 0.249946 | 2.693113 | down | coding | NM_012109    | TMEM59L  | chr19 | + |
| ASHG19A3A012527 | 0.002693 | 0.074583 | 9.490215 | down | coding | NM_001080436 | WTIP     | chr19 | + |
| ASHG19A3A012664 | 0.008393 | 0.118927 | 3.323599 | down | coding | NM_022835    | PLEKHG2  | chr19 | + |
| ASHG19A3A012709 | 0.013342 | 0.145655 | 5.047855 | down | coding | NM_001699    | AXL      | chr19 | + |
| ASHG19A3A012769 | 0.003464 | 0.083068 | 2.765259 | down | coding | NM_000081    | LYST     | chr1  | - |
| ASHG19A3A012788 | 0.009868 | 0.127105 | 2.406136 | down | coding | NM_002856    | PVRL2    | chr19 | + |
| ASHG19A3A012846 | 0.006909 | 0.110581 | 16.70974 | down | coding | NM_014601    | EHD2     | chr19 | + |
| ASHG19A3A012851 | 0.005356 | 0.099072 | 2.147413 | down | coding | NM_000554    | CRX      | chr19 | + |
| ASHG19A3A012856 | 0.029802 | 0.210837 | 9.262881 | down | coding | NM_001425    | EMP3     | chr19 | + |
| ASHG19A3A012934 | 0.000283 | 0.031138 | 47.94802 | down | coding | NM_014424    | HSPB7    | chr1  | - |
| ASHG19A3A013173 | 0.000663 | 0.042765 | 3.036008 | down | coding | NM_014322    | OPN3     | chr1  | - |
| ASHG19A3A013327 | 0.027852 | 0.203809 | 30.49636 | down | coding | NM_145260    | OSR1     | chr2  | - |

|                 |          |          |          |      |        |              |          |      |   |
|-----------------|----------|----------|----------|------|--------|--------------|----------|------|---|
| ASHG19A3A013335 | 0.000142 | 0.026643 | 3.140946 | down | coding | NM_014713    | LAPTM4A  | chr2 | - |
| ASHG19A3A013340 | 0.003427 | 0.083068 | 10.74154 | down | coding | NM_005465    | AKT3     | chr1 | - |
| ASHG19A3A013385 | 0.034549 | 0.22417  | 2.808659 | down | coding | NM_175630    | DNMT3A   | chr2 | - |
| ASHG19A3A013436 | 0.013116 | 0.144029 | 5.416619 | down | coding | NM_022823    | FNDC4    | chr2 | - |
| ASHG19A3A013506 | 8.42E-05 | 0.023249 | 9.332079 | down | coding | NM_006449    | CDC42EP3 | chr2 | - |
| ASHG19A3A013537 | 0.011618 | 0.136714 | 3.004745 | down | coding | NM_001112801 | SLC8A1   | chr2 | - |
| ASHG19A3A013538 | 0.049438 | 0.263893 | 2.114764 | down | coding | NM_001112800 | SLC8A1   | chr2 | - |
| ASHG19A3A013601 | 0.019523 | 0.174414 | 17.56106 | down | coding | NM_022055    | KCNK12   | chr2 | - |
| ASHG19A3A013645 | 0.001901 | 0.063466 | 4.114119 | down | coding | NM_020532    | RTN4     | chr2 | - |
| ASHG19A3A013800 | 0.006958 | 0.110944 | 2.150945 | down | coding | NM_014911    | AAK1     | chr2 | - |
| ASHG19A3A013839 | 0.000467 | 0.037289 | 2.240348 | down | coding | NM_032319    | C2orf7   | chr2 | - |
| ASHG19A3A013873 | 0.034661 | 0.224385 | 5.653828 | down | coding | NM_032603    | LOXL3    | chr2 | - |
| ASHG19A3A013955 | 0.016752 | 0.162038 | 2.573416 | down | coding | NM_003896    | ST3GAL5  | chr2 | - |
| ASHG19A3A013981 | 0.039381 | 0.236867 | 3.946772 | down | coding | NM_016618    | KRCC1    | chr2 | - |
| ASHG19A3A014044 | 0.002366 | 0.07092  | 6.344592 | down | coding | NM_152486    | SAMD11   | chr1 | + |
| ASHG19A3A014051 | 0.013865 | 0.148967 | 2.639352 | down | coding | NM_017849    | TMEM127  | chr2 | - |
| ASHG19A3A014098 | 0.008382 | 0.118908 | 5.623223 | down | coding | NM_004854    | CHST10   | chr2 | - |
| ASHG19A3A014193 | 0.000903 | 0.048989 | 22.72481 | down | coding | NM_033514    | LIMS3    | chr2 | - |
| ASHG19A3A014247 | 0.002358 | 0.07092  | 2.126365 | down | coding | NM_001130413 | SCNN1D   | chr1 | + |
| ASHG19A3A014525 | 0.000969 | 0.050297 | 2.395107 | down | coding | NM_006983    | MMP23B   | chr1 | + |
| ASHG19A3A014545 | 0.012214 | 0.139575 | 6.323966 | down | coding | NM_002897    | RBMS1    | chr2 | - |
| ASHG19A3A014562 | 0.046305 | 0.255817 | 2.280131 | down | coding | NM_004460    | FAP      | chr2 | - |
| ASHG19A3A014568 | 0.006437 | 0.106243 | 2.715435 | down | coding | NM_018086    | FIGN     | chr2 | - |
| ASHG19A3A014599 | 0.006155 | 0.104193 | 2.275985 | down | coding | NM_003036    | SKI      | chr1 | + |
| ASHG19A3A014695 | 0.001714 | 0.061148 | 8.757053 | down | coding | NM_001135212 | FKBP7    | chr2 | - |
| ASHG19A3A014756 | 0.039399 | 0.236897 | 2.011864 | down | coding | NM_182752    | TPRG1L   | chr1 | + |
| ASHG19A3A014759 | 8.72E-05 | 0.023451 | 87.27563 | down | coding | NM_000393    | COL5A2   | chr2 | - |
| ASHG19A3A014780 | 0.014562 | 0.1526   | 2.858595 | down | coding | NM_007315    | STAT1    | chr2 | - |
| ASHG19A3A014781 | 0.024916 | 0.194292 | 3.177765 | down | coding | NM_139266    | STAT1    | chr2 | - |
| ASHG19A3A014965 | 0.00139  | 0.056547 | 59.36468 | down | coding | NM_054034    | FN1      | chr2 | - |
| ASHG19A3A014981 | 0.003009 | 0.079913 | 583.7841 | down | coding | NM_000599    | IGFBP5   | chr2 | - |
| ASHG19A3A015022 | 0.000262 | 0.031138 | 5.37916  | down | coding | NM_024506    | GLB1L    | chr2 | - |
| ASHG19A3A015025 | 0.003533 | 0.083557 | 58.60394 | down | coding | NM_002846    | PTPRN    | chr2 | - |

|                 |          |          |          |      |        |              |         |      |   |
|-----------------|----------|----------|----------|------|--------|--------------|---------|------|---|
| ASHG19A3A015092 | 0.001654 | 0.060728 | 6.265963 | down | coding | NM_080424    | SP110   | chr2 | - |
| ASHG19A3A015093 | 0.011966 | 0.138585 | 5.36041  | down | coding | NM_004510    | SP110   | chr2 | - |
| ASHG19A3A015114 | 0.036916 | 0.230819 | 6.314481 | down | coding | NM_024409    | NPPC    | chr2 | - |
| ASHG19A3A015328 | 0.002506 | 0.071789 | 3.773946 | down | coding | NM_033090    | GREB1   | chr2 | + |
| ASHG19A3A015330 | 0.036859 | 0.230685 | 3.899004 | down | coding | NM_145693    | LPIN1   | chr2 | + |
| ASHG19A3A015395 | 0.000198 | 0.028013 | 2.915916 | down | coding | NM_022787    | NMNAT1  | chr1 | + |
| ASHG19A3A015401 | 0.035009 | 0.225323 | 2.476816 | down | coding | NM_003743    | NCOA1   | chr2 | + |
| ASHG19A3A015432 | 0.002086 | 0.067209 | 109.6955 | down | coding | NM_007046    | EMILIN1 | chr2 | + |
| ASHG19A3A015466 | 0.001772 | 0.062152 | 3.344498 | down | coding | NM_183416    | KIF1B   | chr1 | + |
| ASHG19A3A015476 | 0.026384 | 0.198669 | 2.205823 | down | coding | NM_001127401 | YPEL5   | chr2 | + |
| ASHG19A3A015478 | 0.003009 | 0.079913 | 4.448613 | down | coding | NM_030915    | LBH     | chr2 | + |
| ASHG19A3A015512 | 0.04515  | 0.253128 | 6.213625 | down | coding | NM_016441    | CRIM1   | chr2 | + |
| ASHG19A3A015608 | 0.027852 | 0.203809 | 2.827838 | down | coding | NM_012249    | RHOQ    | chr2 | + |
| ASHG19A3A015654 | 0.001565 | 0.059794 | 3.045886 | down | coding | NM_015701    | ERLEC1  | chr2 | + |
| ASHG19A3A015698 | 0.001019 | 0.051214 | 3.60959  | down | coding | NM_001143960 | C2orf74 | chr2 | + |
| ASHG19A3A015710 | 0.002272 | 0.069865 | 2.691854 | down | coding | NM_152516    | COMMD1  | chr2 | + |
| ASHG19A3A015726 | 0.022265 | 0.184704 | 6.712384 | down | coding | NM_006759    | UGP2    | chr2 | + |
| ASHG19A3A015773 | 0.031563 | 0.214507 | 4.965642 | down | coding | NM_018153    | ANTXR1  | chr2 | + |
| ASHG19A3A015774 | 0.015927 | 0.158107 | 3.830051 | down | coding | NM_053034    | ANTXR1  | chr2 | + |
| ASHG19A3A015835 | 0.009787 | 0.126627 | 3.964074 | down | coding | NM_001615    | ACTG2   | chr2 | + |
| ASHG19A3A015901 | 0.002432 | 0.071184 | 3.803972 | down | coding | NM_031283    | TCF7L1  | chr2 | + |
| ASHG19A3A015911 | 0.032859 | 0.219124 | 12.75138 | down | coding | NM_006634    | VAMP5   | chr2 | + |
| ASHG19A3A015916 | 0.004331 | 0.090616 | 5.084669 | down | coding | NM_032827    | ATOH8   | chr2 | + |
| ASHG19A3A016195 | 0.000499 | 0.037875 | 3.237106 | down | coding | NM_032824    | TMEM87B | chr2 | + |
| ASHG19A3A016241 | 0.004158 | 0.088853 | 19.57009 | down | coding | NM_006474    | PDPN    | chr1 | + |
| ASHG19A3A016290 | 0.011    | 0.133216 | 4.466207 | down | coding | NM_005270    | GLI2    | chr2 | + |
| ASHG19A3A016561 | 0.000909 | 0.049198 | 3.066167 | down | coding | NM_152384    | BBS5    | chr2 | + |
| ASHG19A3A016570 | 0.012726 | 0.142319 | 2.120533 | down | coding | NM_015164    | PLEKHM2 | chr1 | + |
| ASHG19A3A016605 | 0.000595 | 0.040795 | 2.837256 | down | coding | NM_133646    | ZAK     | chr2 | + |
| ASHG19A3A016698 | 0.019338 | 0.173754 | 3.916536 | down | coding | NM_194250    | ZNF804A | chr2 | + |
| ASHG19A3A016710 | 0.001429 | 0.057388 | 6.0766   | down | coding | NM_000090    | COL3A1  | chr2 | + |
| ASHG19A3A016711 | 0.040735 | 0.240474 | 3.748006 | down | coding | NM_001042704 | CLCNKA  | chr1 | + |
| ASHG19A3A016733 | 0.049286 | 0.263603 | 4.381259 | down | coding | NM_001031716 | OBFC2A  | chr2 | + |

|                 |          |          |          |      |        |              |          |       |   |
|-----------------|----------|----------|----------|------|--------|--------------|----------|-------|---|
| ASHG19A3A016827 | 0.014664 | 0.152736 | 17.60839 | down | coding | NM_003507    | FZD7     | chr2  | + |
| ASHG19A3A016831 | 0.010987 | 0.133202 | 3.390706 | down | coding | NM_001204    | BMP2R2   | chr2  | + |
| ASHG19A3A016861 | 0.020694 | 0.178453 | 3.105815 | down | coding | NM_018534    | NRP2     | chr2  | + |
| ASHG19A3A017071 | 1.22E-05 | 0.012771 | 3.247169 | down | coding | NM_007237    | SP140    | chr2  | + |
| ASHG19A3A017073 | 0.035497 | 0.226768 | 3.057207 | down | coding | NM_003113    | SP100    | chr2  | + |
| ASHG19A3A017074 | 0.004577 | 0.093019 | 3.416792 | down | coding | NM_001080391 | SP100    | chr2  | + |
| ASHG19A3A017086 | 0.004121 | 0.088392 | 6.677537 | down | coding | NM_025139    | ARMC9    | chr2  | + |
| ASHG19A3A017173 | 0.001276 | 0.054115 | 28.73767 | down | coding | NM_194312    | ESPNL    | chr2  | + |
| ASHG19A3A017182 | 0.000205 | 0.028229 | 16.58816 | down | coding | NM_057179    | TWIST2   | chr2  | + |
| ASHG19A3A017190 | 0.020562 | 0.177873 | 4.219785 | down | coding | NM_002081    | GPC1     | chr2  | + |
| ASHG19A3A017458 | 0.00016  | 0.026643 | 2.078329 | down | coding | NM_032264    | NBPF3    | chr1  | + |
| ASHG19A3A017648 | 0.009251 | 0.123213 | 12.42314 | down | coding | NM_004613    | TGM2     | chr20 | - |
| ASHG19A3A017796 | 0.04409  | 0.249946 | 23.4102  | down | coding | NM_002237    | KCNG1    | chr20 | - |
| ASHG19A3A017845 | 0.001526 | 0.058898 | 18.92552 | down | coding | NM_153360    | APCDD1L  | chr20 | - |
| ASHG19A3A017961 | 0.006849 | 0.110056 | 11.94733 | down | coding | NM_014723    | SNPH     | chr20 | + |
| ASHG19A3A018017 | 0.016066 | 0.158574 | 2.682119 | down | coding | NM_003818    | CDS2     | chr20 | + |
| ASHG19A3A018041 | 0.029056 | 0.208902 | 4.135042 | down | coding | NM_182797    | PLCB4    | chr20 | + |
| ASHG19A3A018074 | 8.76E-06 | 0.010316 | 4.035931 | down | coding | NM_013943    | CLIC4    | chr1  | + |
| ASHG19A3A018242 | 0.007711 | 0.116328 | 3.620405 | down | coding | NM_032514    | MAP1LC3A | chr20 | + |
| ASHG19A3A018276 | 0.001735 | 0.061656 | 25.46323 | down | coding | NM_006097    | MYL9     | chr20 | + |
| ASHG19A3A018358 | 0.001399 | 0.056656 | 3.400608 | down | coding | NM_031286    | SH3BGRL3 | chr1  | + |
| ASHG19A3A018555 | 0.033529 | 0.221543 | 7.000648 | down | coding | NM_080750    | DPH3B    | chr20 | + |
| ASHG19A3A018708 | 0.002883 | 0.078019 | 2.65858  | down | coding | NM_177424    | STX12    | chr1  | + |
| ASHG19A3A018712 | 0.001252 | 0.054115 | 6.461535 | down | coding | NM_006988    | ADAMTS1  | chr21 | - |
| ASHG19A3A018793 | 0.026321 | 0.198433 | 2.203097 | down | coding | NM_018053    | XKR8     | chr1  | + |
| ASHG19A3A019172 | 0.012028 | 0.138629 | 2.318882 | down | coding | NM_000628    | IL10RB   | chr21 | + |
| ASHG19A3A019181 | 0.001228 | 0.054115 | 2.484752 | down | coding | NM_001001132 | ITSN1    | chr21 | + |
| ASHG19A3A019216 | 0.037699 | 0.233225 | 22.16586 | down | coding | NM_001236    | CBR3     | chr21 | + |
| ASHG19A3A019281 | 0.034708 | 0.224535 | 3.374152 | down | coding | NM_178865    | SERINC2  | chr1  | + |
| ASHG19A3A019364 | 0.023437 | 0.189502 | 2.237465 | down | coding | NM_015833    | ADARB1   | chr21 | + |
| ASHG19A3A019368 | 0.009461 | 0.124511 | 2.240052 | down | coding | NM_130445    | COL18A1  | chr21 | + |
| ASHG19A3A019376 | 0.001661 | 0.060728 | 10.60877 | down | coding | NM_001848    | COL6A1   | chr21 | + |
| ASHG19A3A019382 | 0.004595 | 0.093019 | 64.38334 | down | coding | NM_001849    | COL6A2   | chr21 | + |



|                 |          |          |          |      |        |              |          |       |   |
|-----------------|----------|----------|----------|------|--------|--------------|----------|-------|---|
| ASHG19A3A019398 | 0.007302 | 0.112718 | 2.588628 | down | coding | NM_206889    | DIP2A    | chr21 | + |
| ASHG19A3A019400 | 0.012053 | 0.138767 | 4.488431 | down | coding | NM_206962    | PRMT2    | chr21 | + |
| ASHG19A3A019500 | 0.003941 | 0.087519 | 19.47217 | down | coding | NM_153334    | SCARF2   | chr22 | - |
| ASHG19A3A019642 | 0.024014 | 0.191703 | 17.59094 | down | coding | NM_002430    | MN1      | chr22 | - |
| ASHG19A3A019671 | 0.041875 | 0.243583 | 2.360443 | down | coding | NM_031937    | TBC1D10A | chr22 | - |
| ASHG19A3A019689 | 0.011314 | 0.135345 | 5.848397 | down | coding | NM_080430    | SELM     | chr22 | - |
| ASHG19A3A019694 | 0.0304   | 0.212773 | 4.014707 | down | coding | NM_052880    | PIK3IP1  | chr22 | - |
| ASHG19A3A019814 | 0.013312 | 0.145418 | 2.350498 | down | coding | NM_015374    | SUN2     | chr22 | - |
| ASHG19A3A019854 | 0.008612 | 0.120291 | 5.224417 | down | coding | NM_002676    | PMM1     | chr22 | - |
| ASHG19A3A019869 | 0.027351 | 0.201988 | 2.183616 | down | coding | NM_000262    | NAGA     | chr22 | - |
| ASHG19A3A019890 | 0.03781  | 0.233426 | 2.774666 | down | coding | NM_001165877 | ATP5L2   | chr22 | - |
| ASHG19A3A019896 | 0.029442 | 0.210017 | 2.372332 | down | coding | NM_014570    | ARFGAP3  | chr22 | - |
| ASHG19A3A019920 | 0.001504 | 0.058762 | 2.899321 | down | coding | NM_138415    | PHF21B   | chr22 | - |
| ASHG19A3A020091 | 0.033283 | 0.220702 | 3.760355 | down | coding | NM_002688    | SEPT5    | chr22 | + |
| ASHG19A3A020100 | 0.007367 | 0.113256 | 3.981099 | down | coding | NM_007310    | COMT     | chr22 | + |
| ASHG19A3A020214 | 0.00038  | 0.034338 | 2.769337 | down | coding | NM_018067    | MAP7D1   | chr1  | + |
| ASHG19A3A020299 | 0.00701  | 0.111447 | 2.045927 | down | coding | NM_003462    | DNALI1   | chr1  | + |
| ASHG19A3A020327 | 0.008553 | 0.120202 | 2.778498 | down | coding | NM_134269    | SMTN     | chr22 | + |
| ASHG19A3A020446 | 0.045127 | 0.253128 | 5.709962 | down | coding | NM_016657    | KDEL3    | chr22 | + |
| ASHG19A3A020447 | 0.030017 | 0.211477 | 3.327404 | down | coding | NM_006855    | KDEL3    | chr22 | + |
| ASHG19A3A020460 | 0.045657 | 0.254155 | 6.066861 | down | coding | NM_001006666 | APOBEC3F | chr22 | + |
| ASHG19A3A020462 | 0.004323 | 0.090547 | 4.587999 | down | coding | NM_021822    | APOBEC3G | chr22 | + |
| ASHG19A3A020467 | 0.011424 | 0.135662 | 18.1185  | down | coding | NM_145731    | SYNGR1   | chr22 | + |
| ASHG19A3A020475 | 0.029966 | 0.211328 | 2.766367 | down | coding | NM_012090    | MACF1    | chr1  | + |
| ASHG19A3A020503 | 0.000284 | 0.031138 | 2.868846 | down | coding | NM_014460    | CSDC2    | chr22 | + |
| ASHG19A3A020526 | 0.00184  | 0.063301 | 4.275297 | down | coding | NM_014509    | SERHL2   | chr22 | + |
| ASHG19A3A020686 | 0.000323 | 0.032699 | 2.040438 | down | coding | NM_022094    | CIDEC    | chr3  | - |
| ASHG19A3A020690 | 0.009147 | 0.122749 | 2.446471 | down | coding | NM_018447    | TMEM111  | chr3  | - |
| ASHG19A3A020747 | 0.001979 | 0.065264 | 2.302558 | down | coding | NM_001105530 | CAP1     | chr1  | + |
| ASHG19A3A020882 | 0.000189 | 0.027342 | 14.55913 | down | coding | NM_001134369 | LRRFIP2  | chr3  | - |
| ASHG19A3A020951 | 0.000172 | 0.026643 | 4.770833 | down | coding | NM_018075    | ANO10    | chr3  | - |
| ASHG19A3A021029 | 0.01567  | 0.157046 | 3.723274 | down | coding | NM_016479    | SHISA5   | chr3  | - |
| ASHG19A3A021058 | 0.002114 | 0.067467 | 4.882337 | down | coding | NM_002292    | LAMB2    | chr3  | - |

|                 |          |          |          |      |        |              |          |      |   |
|-----------------|----------|----------|----------|------|--------|--------------|----------|------|---|
| ASHG19A3A021081 | 0.003831 | 0.086652 | 5.368348 | down | coding | NM_003335    | UBA7     | chr3 | - |
| ASHG19A3A021189 | 0.016292 | 0.1597   | 2.512985 | down | coding | NM_001660    | ARF4     | chr3 | - |
| ASHG19A3A021233 | 0.024222 | 0.19182  | 2.641535 | down | coding | NM_173654    | C3orf64  | chr3 | - |
| ASHG19A3A021379 | 0.022686 | 0.186562 | 2.264662 | down | coding | NM_001025079 | CD47     | chr3 | - |
| ASHG19A3A021413 | 0.010767 | 0.132093 | 3.647024 | down | coding | NM_199511    | CCDC80   | chr3 | - |
| ASHG19A3A021467 | 6.31E-05 | 0.021793 | 67.39973 | down | coding | NM_007085    | FSTL1    | chr3 | - |
| ASHG19A3A021496 | 0.002026 | 0.066133 | 6.322225 | down | coding | NM_053031    | MYLK     | chr3 | - |
| ASHG19A3A021503 | 0.001589 | 0.059794 | 3.513473 | down | coding | NM_020733    | HEG1     | chr3 | - |
| ASHG19A3A021543 | 0.010245 | 0.128875 | 10.8742  | down | coding | NM_001003794 | MGLL     | chr3 | - |
| ASHG19A3A021712 | 0.000156 | 0.026643 | 7.797024 | down | coding | NM_182943    | PLOD2    | chr3 | - |
| ASHG19A3A021827 | 0.038054 | 0.233869 | 2.199621 | down | coding | NM_007107    | SSR3     | chr3 | - |
| ASHG19A3A021976 | 0.001891 | 0.063466 | 2.641029 | down | coding | NM_171829    | KCNMB3   | chr3 | - |
| ASHG19A3A022026 | 0.004297 | 0.090264 | 4.189737 | down | coding | NM_001013615 | C1orf190 | chr1 | + |
| ASHG19A3A022034 | 0.009647 | 0.125668 | 15.22469 | down | coding | NM_001025266 | C3orf70  | chr3 | - |
| ASHG19A3A022061 | 0.000942 | 0.049969 | 26.00054 | down | coding | NM_139125    | MASP1    | chr3 | - |
| ASHG19A3A022080 | 8.93E-05 | 0.023512 | 8.972922 | down | coding | NM_018192    | LEPREL1  | chr3 | - |
| ASHG19A3A022250 | 0.009976 | 0.127442 | 2.114137 | down | coding | NM_018462    | C3orf10  | chr3 | + |
| ASHG19A3A022423 | 0.004971 | 0.095751 | 3.398761 | down | coding | NM_006371    | CRTAP    | chr3 | + |
| ASHG19A3A022443 | 0.027465 | 0.202466 | 2.473119 | down | coding | NM_078626    | CDKN2C   | chr1 | + |
| ASHG19A3A022453 | 0.000253 | 0.031138 | 2.346282 | down | coding | NM_014372    | RNF11    | chr1 | + |
| ASHG19A3A022454 | 0.045046 | 0.252924 | 6.509538 | down | coding | NM_015873    | VILL     | chr3 | + |
| ASHG19A3A022608 | 0.012433 | 0.140622 | 7.23775  | down | coding | NM_173546    | KLHDC8B  | chr3 | + |
| ASHG19A3A022614 | 0.003579 | 0.08383  | 2.273073 | down | coding | NM_022171    | TCTA     | chr3 | + |
| ASHG19A3A022676 | 0.029075 | 0.208902 | 2.185222 | down | coding | NM_001007099 | SCP2     | chr1 | + |
| ASHG19A3A022729 | 0.022107 | 0.183967 | 3.510311 | down | coding | NM_017771    | PXK      | chr3 | + |
| ASHG19A3A022786 | 0.002172 | 0.068508 | 3.520387 | down | coding | NM_006407    | ARL6IP5  | chr3 | + |
| ASHG19A3A022790 | 0.007715 | 0.116328 | 4.927857 | down | coding | NM_198178    | MITF     | chr3 | + |
| ASHG19A3A022809 | 0.029705 | 0.210462 | 3.790658 | down | coding | NM_001080393 | GXYLT2   | chr3 | + |
| ASHG19A3A022917 | 0.019657 | 0.174937 | 4.788889 | down | coding | NM_001850    | COL8A1   | chr3 | + |
| ASHG19A3A022928 | 0.022611 | 0.186121 | 12.77339 | down | coding | NM_018004    | TMEM45A  | chr3 | + |
| ASHG19A3A022954 | 0.022724 | 0.186756 | 7.850178 | down | coding | NM_001627    | ALCAM    | chr3 | + |
| ASHG19A3A022983 | 0.009806 | 0.126657 | 7.895484 | down | coding | NM_015480    | PVRL3    | chr3 | + |
| ASHG19A3A023257 | 0.009931 | 0.127353 | 5.527957 | down | coding | NM_002718    | PPP2R3A  | chr3 | + |

|                 |          |          |          |      |        |              |         |      |   |
|-----------------|----------|----------|----------|------|--------|--------------|---------|------|---|
| ASHG19A3A023401 | 0.003239 | 0.081978 | 3.159337 | down | coding | NM_021038    | MBNL1   | chr3 | + |
| ASHG19A3A023442 | 0.035378 | 0.22646  | 7.871845 | down | coding | NM_002852    | PTX3    | chr3 | + |
| ASHG19A3A023451 | 0.032359 | 0.216983 | 4.169968 | down | coding | NM_022736    | MFSD1   | chr3 | + |
| ASHG19A3A023697 | 0.03676  | 0.230294 | 3.775793 | down | coding | NM_001167671 | LPP     | chr3 | + |
| ASHG19A3A023803 | 0.004977 | 0.095751 | 4.885362 | down | coding | NM_001122819 | KIF17   | chr1 | - |
| ASHG19A3A023853 | 0.005632 | 0.100825 | 5.3641   | down | coding | NM_017526    | LEPROT  | chr1 | + |
| ASHG19A3A023908 | 0.031105 | 0.214095 | 2.894875 | down | coding | NM_153376    | CCDC96  | chr4 | - |
| ASHG19A3A023952 | 0.034604 | 0.224228 | 27.39349 | down | coding | NM_053042    | ZNF518B | chr4 | - |
| ASHG19A3A023981 | 0.004024 | 0.087853 | 14.84116 | down | coding | NM_032291    | SGIP1   | chr1 | + |
| ASHG19A3A024027 | 0.000667 | 0.042871 | 2.548472 | down | coding | NM_001130726 | CCDC149 | chr4 | - |
| ASHG19A3A024069 | 0.024874 | 0.194139 | 2.829976 | down | coding | NM_001085400 | RELL1   | chr4 | - |
| ASHG19A3A024083 | 0.013871 | 0.148967 | 2.605269 | down | coding | NM_024943    | TMEM156 | chr4 | - |
| ASHG19A3A024173 | 0.001152 | 0.053318 | 5.568949 | down | coding | NM_000232    | SGCB    | chr4 | - |
| ASHG19A3A024180 | 0.01613  | 0.158949 | 2.651222 | down | coding | NM_152540    | SCFD2   | chr4 | - |
| ASHG19A3A024360 | 0.003153 | 0.081204 | 4.703635 | down | coding | NM_005506    | SCARB2  | chr4 | - |
| ASHG19A3A024394 | 0.003356 | 0.083054 | 20.46485 | down | coding | NM_058172    | ANTXR2  | chr4 | - |
| ASHG19A3A024479 | 0.039264 | 0.236631 | 11.25505 | down | coding | NM_153757    | NAP1L5  | chr4 | - |
| ASHG19A3A024511 | 0.007082 | 0.111447 | 3.546346 | down | coding | NM_001968    | EIF4E   | chr4 | - |
| ASHG19A3A024514 | 0.004739 | 0.093712 | 2.090578 | down | coding | NM_000671    | ADH5    | chr4 | - |
| ASHG19A3A024549 | 0.037772 | 0.233374 | 2.26474  | down | coding | NM_005908    | MANBA   | chr4 | - |
| ASHG19A3A024650 | 0.024824 | 0.193974 | 5.456981 | down | coding | NM_003619    | PRSS12  | chr4 | - |
| ASHG19A3A024654 | 0.011836 | 0.137928 | 6.20791  | down | coding | NM_014822    | SEC24D  | chr4 | - |
| ASHG19A3A024663 | 2.97E-05 | 0.016153 | 7.596591 | down | coding | NM_033430    | PDE5A   | chr4 | - |
| ASHG19A3A024664 | 0.001261 | 0.054115 | 6.219333 | down | coding | NM_001083    | PDE5A   | chr4 | - |
| ASHG19A3A024676 | 0.00723  | 0.11225  | 3.438355 | down | coding | NM_001154    | ANXA5   | chr4 | - |
| ASHG19A3A024680 | 0.006679 | 0.108511 | 2.211883 | down | coding | NM_176824    | BBS7    | chr4 | - |
| ASHG19A3A024716 | 0.038017 | 0.233813 | 2.070154 | down | coding | NM_006320    | PGRMC2  | chr4 | - |
| ASHG19A3A024822 | 0.018609 | 0.17012  | 2.57972  | down | coding | NM_178835    | ZNF827  | chr4 | - |
| ASHG19A3A024847 | 0.024649 | 0.193369 | 4.040461 | down | coding | NM_007034    | DNAJB4  | chr1 | + |
| ASHG19A3A024936 | 0.001718 | 0.061148 | 8.976865 | down | coding | NM_001012414 | TRIM61  | chr4 | - |
| ASHG19A3A025054 | 0.001022 | 0.051214 | 4.720944 | down | coding | NM_001111319 | CLDN22  | chr4 | - |
| ASHG19A3A025138 | 0.021583 | 0.182328 | 2.040129 | down | coding | NM_001127178 | PIGG    | chr4 | + |
| ASHG19A3A025229 | 0.017876 | 0.16665  | 2.229043 | down | coding | NM_015274    | MAN2B2  | chr4 | + |

|                 |          |          |          |      |        |              |          |      |   |
|-----------------|----------|----------|----------|------|--------|--------------|----------|------|---|
| ASHG19A3A025264 | 0.007808 | 0.116887 | 17.96433 | down | coding | NM_001554    | CYR61    | chr1 | + |
| ASHG19A3A025315 | 0.042428 | 0.244962 | 2.666807 | down | coding | NM_001145191 | FAM200B  | chr4 | + |
| ASHG19A3A025375 | 0.03587  | 0.227906 | 3.148609 | down | coding | NM_018317    | TBC1D19  | chr4 | + |
| ASHG19A3A025388 | 0.002042 | 0.066427 | 29.46968 | down | coding | NM_002589    | PCDH7    | chr4 | + |
| ASHG19A3A025426 | 0.012261 | 0.139841 | 3.483861 | down | coding | NM_138389    | FAM114A1 | chr4 | + |
| ASHG19A3A025466 | 0.005366 | 0.099072 | 32.06183 | down | coding | NM_001080505 | SHISA3   | chr4 | + |
| ASHG19A3A025551 | 0.014159 | 0.150369 | 3.677932 | down | coding | NM_206919    | ARL9     | chr4 | + |
| ASHG19A3A025657 | 0.005372 | 0.09908  | 2.908221 | down | coding | NM_003759    | SLC4A4   | chr4 | + |
| ASHG19A3A025761 | 0.00416  | 0.088853 | 3.497394 | down | coding | NM_031305    | ARHGAP24 | chr4 | + |
| ASHG19A3A025810 | 0.038818 | 0.23597  | 3.791543 | down | coding | NM_001011516 | PDLIM5   | chr4 | + |
| ASHG19A3A026071 | 0.042461 | 0.244962 | 2.449512 | down | coding | NM_032547    | SCOC     | chr4 | + |
| ASHG19A3A026146 | 0.004339 | 0.090701 | 27.38671 | down | coding | NM_006439    | MAB21L2  | chr4 | + |
| ASHG19A3A026401 | 0.012007 | 0.138629 | 2.298075 | down | coding | NM_015976    | SNX7     | chr1 | + |
| ASHG19A3A026517 | 0.031364 | 0.214234 | 58.65465 | down | coding | NM_003966    | SEMA5A   | chr5 | - |
| ASHG19A3A026691 | 0.01372  | 0.148408 | 2.28386  | down | coding | NM_023073    | C5orf42  | chr5 | - |
| ASHG19A3A026808 | 0.021037 | 0.180024 | 7.782058 | down | coding | NM_002184    | IL6ST    | chr5 | - |
| ASHG19A3A026990 | 0.021105 | 0.180171 | 2.782615 | down | coding | NM_000046    | ARSB     | chr5 | - |
| ASHG19A3A027095 | 0.012007 | 0.138629 | 5.085946 | down | coding | NM_002397    | MEF2C    | chr5 | - |
| ASHG19A3A027127 | 0.004993 | 0.095909 | 4.317994 | down | coding | NM_173665    | C5orf36  | chr5 | - |
| ASHG19A3A027136 | 0.000937 | 0.049896 | 5.282652 | down | coding | NM_002064    | GLRX     | chr5 | - |
| ASHG19A3A027139 | 0.000398 | 0.034548 | 4.701994 | down | coding | NM_012081    | ELL2     | chr5 | - |
| ASHG19A3A027148 | 0.024119 | 0.191703 | 2.634403 | down | coding | NM_001040458 | ERAP1    | chr5 | - |
| ASHG19A3A027208 | 0.000986 | 0.050586 | 3.42829  | down | coding | NM_014819    | PJA2     | chr5 | - |
| ASHG19A3A027256 | 0.000256 | 0.031138 | 3.273907 | down | coding | NM_021649    | TICAM2   | chr5 | - |
| ASHG19A3A027257 | 0.003364 | 0.083054 | 2.028121 | down | coding | NM_181836    | TMED7    | chr5 | - |
| ASHG19A3A027334 | 0.007228 | 0.11225  | 2.432973 | down | coding | NM_178450    | MARCH3   | chr5 | - |
| ASHG19A3A027371 | 0.017971 | 0.167125 | 2.264147 | down | coding | NM_020141    | TMEM167B | chr1 | + |
| ASHG19A3A027388 | 0.042686 | 0.24598  | 2.053571 | down | coding | NM_015146    | SEPT8    | chr5 | - |
| ASHG19A3A027394 | 0.016267 | 0.159663 | 2.5662   | down | coding | NM_014423    | AFF4     | chr5 | - |
| ASHG19A3A027425 | 0.004299 | 0.090264 | 4.438424 | down | coding | NM_138609    | H2AFY    | chr5 | - |
| ASHG19A3A027466 | 0.043297 | 0.24776  | 2.136672 | down | coding | NM_152686    | DNAJC18  | chr5 | - |
| ASHG19A3A027477 | 0.019504 | 0.174349 | 4.543494 | down | coding | NM_001945    | HBEGF    | chr5 | - |
| ASHG19A3A027596 | 0.003683 | 0.085124 | 35.97574 | down | coding | NM_001155    | ANXA6    | chr5 | - |

|                 |          |          |          |      |        |              |         |      |   |
|-----------------|----------|----------|----------|------|--------|--------------|---------|------|---|
| ASHG19A3A027602 | 0.00319  | 0.081478 | 72.61874 | down | coding | NM_003118    | SPARC   | chr5 | - |
| ASHG19A3A027631 | 0.003903 | 0.086787 | 6.922477 | down | coding | NM_000850    | GSTM4   | chr1 | + |
| ASHG19A3A027653 | 0.004822 | 0.094196 | 3.413201 | down | coding | NM_031908    | C1QTNF2 | chr5 | - |
| ASHG19A3A027655 | 0.00944  | 0.124367 | 9.831684 | down | coding | NM_000848    | GSTM2   | chr1 | + |
| ASHG19A3A027672 | 0.041415 | 0.24206  | 3.42596  | down | coding | NM_000561    | GSTM1   | chr1 | + |
| ASHG19A3A027686 | 0.046737 | 0.256753 | 10.85728 | down | coding | NM_000851    | GSTM5   | chr1 | + |
| ASHG19A3A027698 | 0.045813 | 0.254423 | 4.416844 | down | coding | NM_004417    | DUSP1   | chr5 | - |
| ASHG19A3A027730 | 0.030176 | 0.212251 | 2.812152 | down | coding | NM_172212    | CSF1    | chr1 | + |
| ASHG19A3A027731 | 0.008448 | 0.119535 | 5.654368 | down | coding | NM_000757    | CSF1    | chr1 | + |
| ASHG19A3A027748 | 0.014546 | 0.152522 | 3.684972 | down | coding | NM_203352    | PDLIM7  | chr5 | - |
| ASHG19A3A027749 | 0.000581 | 0.040537 | 6.15777  | down | coding | NM_213636    | PDLIM7  | chr5 | - |
| ASHG19A3A027801 | 0.007416 | 0.113562 | 9.992582 | down | coding | NM_005110    | GFPT2   | chr5 | - |
| ASHG19A3A027980 | 0.04216  | 0.244591 | 2.085924 | down | coding | NM_007118    | TRIO    | chr5 | + |
| ASHG19A3A028000 | 0.002254 | 0.069808 | 307.3362 | down | coding | NM_006317    | BASP1   | chr5 | + |
| ASHG19A3A028066 | 0.007108 | 0.111447 | 6.072442 | down | coding | NM_004932    | CDH6    | chr5 | + |
| ASHG19A3A028096 | 0.019664 | 0.174937 | 4.106886 | down | coding | NM_001145521 | RAI14   | chr5 | + |
| ASHG19A3A028107 | 0.00592  | 0.103084 | 2.494928 | down | coding | NM_002185    | IL7R    | chr5 | + |
| ASHG19A3A028135 | 0.023425 | 0.189502 | 10.63406 | down | coding | NM_001168355 | OSMR    | chr5 | + |
| ASHG19A3A028136 | 0.008156 | 0.118004 | 7.916265 | down | coding | NM_003999    | OSMR    | chr5 | + |
| ASHG19A3A028197 | 0.035306 | 0.226456 | 2.536997 | down | coding | NM_015946    | PELO    | chr5 | + |
| ASHG19A3A028198 | 0.014698 | 0.152736 | 22.81886 | down | coding | NM_181501    | ITGA1   | chr5 | + |
| ASHG19A3A028205 | 0.000555 | 0.039761 | 65.00623 | down | coding | NM_006350    | FST     | chr5 | + |
| ASHG19A3A028355 | 0.005552 | 0.100597 | 19.37859 | down | coding | NM_005909    | MAP1B   | chr5 | + |
| ASHG19A3A028392 | 0.000269 | 0.031138 | 2.141258 | down | coding | NM_016218    | POLK    | chr5 | + |
| ASHG19A3A028445 | 0.019748 | 0.175242 | 3.642018 | down | coding | NM_205548    | FAM151B | chr5 | + |
| ASHG19A3A028490 | 0.00358  | 0.08383  | 2.159276 | down | coding | NM_152696    | HIPK1   | chr1 | + |
| ASHG19A3A028503 | 0.007078 | 0.111447 | 83.76769 | down | coding | NM_020190    | OLFML3  | chr1 | + |
| ASHG19A3A028561 | 0.012722 | 0.142319 | 3.598396 | down | coding | NM_001012761 | RGMB    | chr5 | + |
| ASHG19A3A028704 | 0.00147  | 0.058292 | 4.073293 | down | coding | NM_014035    | SNX24   | chr5 | + |
| ASHG19A3A028778 | 0.003097 | 0.08044  | 31.79944 | down | coding | NM_003687    | PDLIM4  | chr5 | + |
| ASHG19A3A028779 | 0.004763 | 0.093712 | 3.705398 | down | coding | NM_003059    | SLC22A4 | chr5 | + |
| ASHG19A3A028822 | 0.011384 | 0.135662 | 2.969802 | down | coding | NM_024715    | TXNDC15 | chr5 | + |
| ASHG19A3A028908 | 0.021069 | 0.180024 | 3.053391 | down | coding | NM_031852    | PCDHA7  | chr5 | + |

|                 |          |          |          |      |        |              |           |      |   |
|-----------------|----------|----------|----------|------|--------|--------------|-----------|------|---|
| ASHG19A3A028948 | 0.008643 | 0.120291 | 4.066124 | down | coding | NM_032086    | PCDHGA6   | chr5 | + |
| ASHG19A3A028950 | 0.000381 | 0.034338 | 13.44321 | down | coding | NM_032098    | PCDHGB4   | chr5 | + |
| ASHG19A3A028952 | 0.002285 | 0.069865 | 7.472497 | down | coding | NM_032099    | PCDHGB5   | chr5 | + |
| ASHG19A3A028953 | 0.005238 | 0.098531 | 2.37937  | down | coding | NM_032100    | PCDHGB6   | chr5 | + |
| ASHG19A3A028970 | 0.016226 | 0.159515 | 15.65845 | down | coding | NM_017709    | FAM46C    | chr1 | + |
| ASHG19A3A029015 | 0.000487 | 0.037875 | 25.28648 | down | coding | NM_000024    | ADRB2     | chr5 | + |
| ASHG19A3A029019 | 0.029746 | 0.210672 | 3.914336 | down | coding | NM_152406    | AFAP1L1   | chr5 | + |
| ASHG19A3A029046 | 0.004262 | 0.089983 | 5.30583  | down | coding | NM_007286    | SYNPO     | chr5 | + |
| ASHG19A3A029065 | 0.005858 | 0.10292  | 3.145281 | down | coding | NM_198321    | GALNT10   | chr5 | + |
| ASHG19A3A029158 | 0.004351 | 0.090758 | 2.359289 | down | coding | NM_003945    | ATP6V0E1  | chr5 | + |
| ASHG19A3A029237 | 0.010497 | 0.130705 | 2.333553 | down | coding | NM_017510    | TMED9     | chr5 | + |
| ASHG19A3A029333 | 0.001497 | 0.058762 | 5.05824  | down | coding | NM_001069    | TUBB2A    | chr6 | - |
| ASHG19A3A029340 | 0.010084 | 0.127962 | 11.36278 | down | coding | NM_183373    | C6orf145  | chr6 | - |
| ASHG19A3A029414 | 0.035642 | 0.227147 | 2.642709 | down | coding | NM_017770    | ELOVL2    | chr6 | - |
| ASHG19A3A029448 | 0.024136 | 0.191708 | 3.010186 | down | coding | NM_001105568 | KIF13A    | chr6 | - |
| ASHG19A3A029528 | 0.011797 | 0.137852 | 3.383489 | down | coding | NM_005319    | HIST1H1C  | chr6 | - |
| ASHG19A3A029533 | 0.025282 | 0.19529  | 3.532447 | down | coding | NM_003530    | HIST1H3D  | chr6 | - |
| ASHG19A3A029542 | 0.003513 | 0.083557 | 2.892088 | down | coding | NM_003543    | HIST1H4H  | chr6 | - |
| ASHG19A3A029555 | 0.020719 | 0.178522 | 2.321298 | down | coding | NM_080593    | HIST1H2BK | chr6 | - |
| ASHG19A3A029737 | 0.004432 | 0.091547 | 3.231409 | down | coding | NM_030651    | PRRT1     | chr6 | - |
| ASHG19A3A029744 | 0.026265 | 0.198323 | 3.056752 | down | coding | NM_153713    | LIX1L     | chr1 | + |
| ASHG19A3A029764 | 0.014051 | 0.150337 | 2.302152 | down | coding | NM_003846    | PEX11B    | chr1 | + |
| ASHG19A3A029765 | 0.047808 | 0.26055  | 8.305202 | down | coding | NM_148919    | PSMB8     | chr6 | - |
| ASHG19A3A029823 | 0.011093 | 0.133841 | 2.376887 | down | coding | NM_003214    | TEAD3     | chr6 | - |
| ASHG19A3A029846 | 0.02279  | 0.18681  | 2.660586 | down | coding | NM_014341    | MTCH1     | chr6 | - |
| ASHG19A3A029847 | 0.009047 | 0.122219 | 4.703787 | down | coding | NM_145316    | TMEM217   | chr6 | - |
| ASHG19A3A029848 | 0.007832 | 0.116921 | 3.470078 | down | coding | NM_001162900 | TMEM217   | chr6 | - |
| ASHG19A3A029879 | 0.00038  | 0.034338 | 2.325229 | down | coding | NM_014455    | RNF115    | chr1 | + |
| ASHG19A3A029913 | 0.017219 | 0.164351 | 3.14043  | down | coding | NM_000322    | PRPH2     | chr6 | - |
| ASHG19A3A029917 | 0.000148 | 0.026643 | 2.3834   | down | coding | NM_001008739 | C6orf226  | chr6 | - |
| ASHG19A3A029936 | 0.007187 | 0.111953 | 2.185647 | down | coding | NM_015388    | YIPF3     | chr6 | - |
| ASHG19A3A030022 | 0.048146 | 0.261157 | 5.495954 | down | coding | NM_012288    | TRAM2     | chr6 | - |
| ASHG19A3A030151 | 0.001122 | 0.053047 | 3.340374 | down | coding | NM_012434    | SLC17A5   | chr6 | - |

|                 |          |          |          |      |        |              |            |      |   |
|-----------------|----------|----------|----------|------|--------|--------------|------------|------|---|
| ASHG19A3A030190 | 0.003771 | 0.086392 | 5.030171 | down | coding | NM_017633    | FAM46A     | chr6 | - |
| ASHG19A3A030350 | 0.009204 | 0.122934 | 3.158724 | down | coding | NM_014028    | OSTM1      | chr6 | - |
| ASHG19A3A030398 | 0.040226 | 0.239125 | 13.09949 | down | coding | NM_001105206 | LAMA4      | chr6 | - |
| ASHG19A3A030452 | 0.049824 | 0.264457 | 3.535468 | down | coding | NM_001042475 | C6orf204   | chr6 | - |
| ASHG19A3A030470 | 0.020138 | 0.176389 | 3.435689 | down | coding | NM_020755    | SERINC1    | chr6 | - |
| ASHG19A3A030488 | 0.006476 | 0.106393 | 3.781823 | down | coding | NM_001040874 | HIST2H2AA4 | chr1 | + |
| ASHG19A3A030520 | 0.022469 | 0.185503 | 2.965182 | down | coding | NM_001431    | EPB41L2    | chr6 | - |
| ASHG19A3A030524 | 0.024212 | 0.19182  | 2.275649 | down | coding | NM_004830    | MED23      | chr6 | - |
| ASHG19A3A030530 | 0.001524 | 0.058898 | 17.70577 | down | coding | NM_001901    | CTGF       | chr6 | - |
| ASHG19A3A030532 | 0.001697 | 0.060953 | 9.367432 | down | coding | NM_015529    | MOXD1      | chr6 | - |
| ASHG19A3A030538 | 0.007866 | 0.117005 | 15.08977 | down | coding | NM_016274    | PLEKHO1    | chr1 | + |
| ASHG19A3A030579 | 0.008831 | 0.120946 | 17.32369 | down | coding | NM_024579    | C1orf54    | chr1 | + |
| ASHG19A3A030585 | 0.001079 | 0.052289 | 6.3788   | down | coding | NM_144697    | C1orf51    | chr1 | + |
| ASHG19A3A030620 | 0.000674 | 0.043069 | 8.558419 | down | coding | NM_006079    | CITED2     | chr6 | - |
| ASHG19A3A030691 | 0.002253 | 0.069808 | 2.40297  | down | coding | NM_032832    | LRP11      | chr6 | - |
| ASHG19A3A030713 | 0.002742 | 0.075389 | 12.88261 | down | coding | NM_004425    | ECM1       | chr1 | + |
| ASHG19A3A030760 | 0.004657 | 0.093229 | 6.151358 | down | coding | NM_025008    | ADAMTSL4   | chr1 | + |
| ASHG19A3A030774 | 0.032283 | 0.216971 | 7.615586 | down | coding | NM_019032    | ADAMTSL4   | chr1 | + |
| ASHG19A3A030788 | 0.009574 | 0.125552 | 5.14774  | down | coding | NM_020133    | AGPAT4     | chr6 | - |
| ASHG19A3A030952 | 0.014366 | 0.151394 | 8.344891 | down | coding | NM_006818    | MLLT11     | chr1 | + |
| ASHG19A3A030958 | 0.017558 | 0.165417 | 2.256146 | down | coding | NM_001718    | BMP6       | chr6 | + |
| ASHG19A3A030995 | 0.021198 | 0.180637 | 3.141002 | down | coding | NM_001168319 | EDN1       | chr6 | + |
| ASHG19A3A031030 | 9.96E-05 | 0.023735 | 7.53023  | down | coding | NM_006366    | CAP2       | chr6 | + |
| ASHG19A3A031089 | 0.002452 | 0.071184 | 3.220884 | down | coding | NM_006355    | TRIM38     | chr6 | + |
| ASHG19A3A031100 | 0.026234 | 0.198323 | 2.991001 | down | coding | NM_003512    | HIST1H2AC  | chr6 | + |
| ASHG19A3A031119 | 0.032476 | 0.217339 | 2.09506  | down | coding | NM_006995    | BTN2A2     | chr6 | + |
| ASHG19A3A031154 | 0.017797 | 0.166328 | 2.511135 | down | coding | NM_003521    | HIST1H2BM  | chr6 | + |
| ASHG19A3A031156 | 0.027067 | 0.201258 | 2.050456 | down | coding | NM_003520    | HIST1H2BN  | chr6 | + |
| ASHG19A3A031180 | 0.00941  | 0.124339 | 2.199293 | down | coding | NM_001007531 | NKAPL      | chr6 | + |
| ASHG19A3A031345 | 0.042399 | 0.244962 | 3.955163 | down | coding | NM_002800    | PSMB9      | chr6 | + |
| ASHG19A3A031413 | 0.034862 | 0.225065 | 5.446328 | down | coding | NM_178428    | LCE2A      | chr1 | + |
| ASHG19A3A031441 | 0.022578 | 0.186    | 3.749301 | down | coding | NM_078467    | CDKN1A     | chr6 | + |
| ASHG19A3A031444 | 0.001252 | 0.054115 | 2.667005 | down | coding | NM_152734    | C6orf89    | chr6 | + |

|                 |          |          |          |      |        |              |          |      |   |
|-----------------|----------|----------|----------|------|--------|--------------|----------|------|---|
| ASHG19A3A031790 | 0.047905 | 0.260742 | 22.72931 | down | coding | NM_002526    | NT5E     | chr6 | + |
| ASHG19A3A031818 | 0.02101  | 0.180024 | 2.704844 | down | coding | NM_006813    | PNRC1    | chr6 | + |
| ASHG19A3A031896 | 0.048959 | 0.262507 | 2.395202 | down | coding | NM_020452    | ATP8B2   | chr1 | + |
| ASHG19A3A031956 | 0.012055 | 0.138767 | 2.841883 | down | coding | NM_001033564 | C6orf225 | chr6 | + |
| ASHG19A3A032002 | 0.014173 | 0.150369 | 2.678621 | down | coding | NM_173674    | DCBLD1   | chr6 | + |
| ASHG19A3A032032 | 0.042843 | 0.246455 | 4.285369 | down | coding | NM_152553    | RNF217   | chr6 | + |
| ASHG19A3A032172 | 0.020073 | 0.176152 | 7.036558 | down | coding | NM_025058    | TRIM46   | chr1 | + |
| ASHG19A3A032174 | 0.005406 | 0.09955  | 9.335787 | down | coding | NM_006834    | RAB32    | chr6 | + |
| ASHG19A3A032350 | 0.030685 | 0.213149 | 2.438959 | down | coding | NM_001029863 | C6orf120 | chr6 | + |
| ASHG19A3A032439 | 0.036181 | 0.228491 | 2.275637 | down | coding | NM_004227    | CYTH3    | chr7 | - |
| ASHG19A3A032444 | 0.017594 | 0.165417 | 2.193895 | down | coding | NM_006854    | KDEL2    | chr7 | - |
| ASHG19A3A032460 | 0.006422 | 0.106091 | 3.234865 | down | coding | NM_005572    | LMNA     | chr1 | + |
| ASHG19A3A032545 | 0.00995  | 0.127353 | 5.721199 | down | coding | NM_032581    | FAM126A  | chr7 | - |
| ASHG19A3A032604 | 0.002352 | 0.070872 | 12.86758 | down | coding | NM_175061    | JAZF1    | chr7 | - |
| ASHG19A3A032621 | 0.001076 | 0.052289 | 3.823227 | down | coding | NM_017946    | FKBP14   | chr7 | - |
| ASHG19A3A032766 | 0.002309 | 0.070288 | 10.71033 | down | coding | NM_001146334 | NACAD    | chr7 | - |
| ASHG19A3A032817 | 0.013832 | 0.148967 | 9.457747 | down | coding | NM_001080471 | PEAR1    | chr1 | + |
| ASHG19A3A032959 | 0.029976 | 0.211328 | 2.134251 | down | coding | NM_016038    | SBDS     | chr7 | - |
| ASHG19A3A033020 | 0.030971 | 0.213821 | 2.666727 | down | coding | NM_030893    | CD1E     | chr1 | + |
| ASHG19A3A033040 | 0.014156 | 0.150369 | 7.726838 | down | coding | NM_006072    | CCL26    | chr7 | - |
| ASHG19A3A033092 | 0.009212 | 0.12295  | 13.89864 | down | coding | NM_001010931 | HGF      | chr7 | - |
| ASHG19A3A033093 | 0.00244  | 0.071184 | 54.69062 | down | coding | NM_001010934 | HGF      | chr7 | - |
| ASHG19A3A033248 | 0.01145  | 0.135767 | 8.272759 | down | coding | NM_024637    | GAL3ST4  | chr7 | - |
| ASHG19A3A033334 | 0.001017 | 0.051214 | 6.128471 | down | coding | NM_003768    | PEA15    | chr1 | + |
| ASHG19A3A033352 | 0.017269 | 0.164505 | 6.523724 | down | coding | NM_175884    | FLJ36031 | chr7 | - |
| ASHG19A3A033383 | 0.036396 | 0.229406 | 2.005161 | down | coding | NM_005598    | NHLH1    | chr1 | + |
| ASHG19A3A033456 | 0.042299 | 0.244731 | 5.406882 | down | coding | NM_005763    | AASS     | chr7 | - |
| ASHG19A3A033594 | 6.74E-06 | 0.009072 | 141.5115 | down | coding | NM_002825    | PTN      | chr7 | - |
| ASHG19A3A033625 | 0.002463 | 0.071236 | 5.335677 | down | coding | NM_015689    | DENND2A  | chr7 | - |
| ASHG19A3A033744 | 0.000169 | 0.026643 | 2.589165 | down | coding | NM_014020    | TMEM176B | chr7 | - |
| ASHG19A3A034009 | 0.013169 | 0.144355 | 5.971297 | down | coding | NM_014707    | HDAC9    | chr7 | + |
| ASHG19A3A034044 | 0.002233 | 0.069808 | 12.63661 | down | coding | NM_000600    | IL6      | chr7 | + |
| ASHG19A3A034122 | 0.004206 | 0.089158 | 7.159461 | down | coding | NM_002585    | PBX1     | chr1 | + |



|                 |          |          |          |      |        |              |          |      |   |
|-----------------|----------|----------|----------|------|--------|--------------|----------|------|---|
| ASHG19A3A034175 | 0.006486 | 0.106393 | 2.025034 | down | coding | NM_004528    | MGST3    | chr1 | + |
| ASHG19A3A034240 | 0.006157 | 0.104193 | 6.341619 | down | coding | NM_024728    | C7orf10  | chr7 | + |
| ASHG19A3A034340 | 0.045271 | 0.253239 | 4.28286  | down | coding | NM_201283    | EGFR     | chr7 | + |
| ASHG19A3A034343 | 0.017301 | 0.164583 | 2.337659 | down | coding | NM_005228    | EGFR     | chr7 | + |
| ASHG19A3A034478 | 0.010939 | 0.133053 | 7.189313 | down | coding | NM_003596    | TPST1    | chr7 | + |
| ASHG19A3A034542 | 0.037514 | 0.232644 | 2.543907 | down | coding | NM_003953    | MPZL1    | chr1 | + |
| ASHG19A3A034660 | 0.011528 | 0.13611  | 4.026975 | down | coding | NM_021151    | CROT     | chr7 | + |
| ASHG19A3A034794 | 0.007728 | 0.116424 | 3.762105 | down | coding | NM_152755    | CNPY4    | chr7 | + |
| ASHG19A3A034795 | 0.018584 | 0.170069 | 2.74418  | down | coding | NM_203397    | MBLAC1   | chr7 | + |
| ASHG19A3A034813 | 0.001614 | 0.060276 | 7.958926 | down | coding | NM_002593    | PCOLCE   | chr7 | + |
| ASHG19A3A034838 | 0.007042 | 0.111447 | 24.90954 | down | coding | NM_000602    | SERPINE1 | chr7 | + |
| ASHG19A3A034940 | 0.003067 | 0.080333 | 6.357848 | down | coding | NM_001172895 | CAV1     | chr7 | + |
| ASHG19A3A034941 | 0.020435 | 0.177343 | 6.042482 | down | coding | NM_001172896 | CAV1     | chr7 | + |
| ASHG19A3A035037 | 0.004649 | 0.093229 | 3.017439 | down | coding | NM_001219    | CALU     | chr7 | + |
| ASHG19A3A035038 | 0.028431 | 0.20607  | 2.735161 | down | coding | NM_001130674 | CALU     | chr7 | + |
| ASHG19A3A035110 | 0.029056 | 0.208902 | 6.261734 | down | coding | NM_033138    | CALD1    | chr7 | + |
| ASHG19A3A035167 | 0.024721 | 0.193409 | 2.11691  | down | coding | NM_004905    | PRDX6    | chr1 | + |
| ASHG19A3A035230 | 0.043337 | 0.247815 | 3.258836 | down | coding | NM_001010972 | ZYX      | chr7 | + |
| ASHG19A3A035240 | 0.00167  | 0.060728 | 6.959861 | down | coding | NM_001130026 | FAM115C  | chr7 | + |
| ASHG19A3A035448 | 1.06E-05 | 0.011744 | 2.864928 | down | coding | NM_175075    | C8orf42  | chr8 | - |
| ASHG19A3A035584 | 0.013149 | 0.144292 | 2.611031 | down | coding | NM_024815    | NUDT18   | chr8 | - |
| ASHG19A3A035610 | 0.001603 | 0.060008 | 135.7766 | down | coding | NM_002318    | LOXL2    | chr8 | - |
| ASHG19A3A035617 | 0.023893 | 0.191098 | 2.527659 | down | coding | NM_000825    | GNRH1    | chr8 | - |
| ASHG19A3A035618 | 0.036946 | 0.230922 | 2.243532 | down | coding | NM_017634    | KCTD9    | chr8 | - |
| ASHG19A3A035728 | 0.001049 | 0.05178  | 37.29164 | down | coding | NM_000930    | PLAT     | chr8 | - |
| ASHG19A3A035731 | 0.022942 | 0.187436 | 2.667673 | down | coding | NM_006749    | SLC20A2  | chr8 | - |
| ASHG19A3A035796 | 0.044538 | 0.251142 | 2.725678 | down | coding | NM_017813    | IMPAD1   | chr8 | - |
| ASHG19A3A035805 | 0.012616 | 0.141741 | 5.679744 | down | coding | NM_014729    | TOX      | chr8 | - |
| ASHG19A3A035861 | 0.015233 | 0.154966 | 8.157786 | down | coding | NM_005098    | MSC      | chr8 | - |
| ASHG19A3A035944 | 0.022165 | 0.184119 | 2.33277  | down | coding | NM_018710    | TMEM55A  | chr8 | - |
| ASHG19A3A035962 | 0.040358 | 0.239304 | 5.971763 | down | coding | NM_005261    | GEM      | chr8 | - |
| ASHG19A3A035971 | 0.00105  | 0.05178  | 5.620067 | down | coding | NM_002826    | QSOX1    | chr1 | + |
| ASHG19A3A035975 | 0.024497 | 0.193107 | 3.447828 | down | coding | NM_001001557 | GDF6     | chr8 | - |

|                 |          |          |          |      |        |              |          |      |   |
|-----------------|----------|----------|----------|------|--------|--------------|----------|------|---|
| ASHG19A3A035987 | 0.018346 | 0.168811 | 4.450875 | down | coding | NM_024759    | NIPAL2   | chr8 | - |
| ASHG19A3A035996 | 0.000922 | 0.04953  | 2.552393 | down | coding | NM_183419    | RNF19A   | chr8 | - |
| ASHG19A3A036076 | 0.007452 | 0.113909 | 4.20269  | down | coding | NM_000127    | EXT1     | chr8 | - |
| ASHG19A3A036079 | 0.041254 | 0.24171  | 3.190777 | down | coding | NM_001531    | MR1      | chr1 | + |
| ASHG19A3A036186 | 0.021368 | 0.181535 | 12.41305 | down | coding | NM_005293    | GPR20    | chr8 | - |
| ASHG19A3A036234 | 0.019723 | 0.175242 | 2.320674 | down | coding | NM_178564    | NRBP2    | chr8 | - |
| ASHG19A3A036328 | 0.008326 | 0.118665 | 6.795882 | down | coding | NM_002293    | LAMC1    | chr1 | + |
| ASHG19A3A036335 | 0.019507 | 0.174349 | 3.286828 | down | coding | NM_012331    | MSRA     | chr8 | + |
| ASHG19A3A036347 | 0.030867 | 0.21347  | 3.70499  | down | coding | NM_015458    | MTMR9    | chr8 | + |
| ASHG19A3A036348 | 0.011425 | 0.135662 | 2.201785 | down | coding | NM_054028    | AMAC1L2  | chr8 | + |
| ASHG19A3A036381 | 0.034524 | 0.22417  | 4.170854 | down | coding | NM_016353    | ZDHHC2   | chr8 | + |
| ASHG19A3A036419 | 0.004842 | 0.094205 | 2.288676 | down | coding | NM_022749    | FAM160B2 | chr8 | + |
| ASHG19A3A036431 | 0.01092  | 0.133053 | 4.836692 | down | coding | NM_005605    | PPP3CC   | chr8 | + |
| ASHG19A3A036436 | 0.004296 | 0.090264 | 2.877943 | down | coding | NM_001013842 | C8orf58  | chr8 | + |
| ASHG19A3A036464 | 0.000387 | 0.034349 | 3.425867 | down | coding | NM_004331    | BNIP3L   | chr8 | + |
| ASHG19A3A036475 | 0.026009 | 0.197961 | 14.24684 | down | coding | NM_016240    | SCARA3   | chr8 | + |
| ASHG19A3A036510 | 0.007352 | 0.113117 | 5.907676 | down | coding | NM_001008712 | RBPMS    | chr8 | + |
| ASHG19A3A036695 | 0.006071 | 0.103718 | 19.4122  | down | coding | NM_015364    | LY96     | chr8 | + |
| ASHG19A3A036782 | 0.018802 | 0.170791 | 13.52911 | down | coding | NM_016134    | PGCP     | chr8 | + |
| ASHG19A3A036876 | 0.00938  | 0.124218 | 19.09703 | down | coding | NM_002514    | NOV      | chr8 | + |
| ASHG19A3A037167 | 0.032139 | 0.216841 | 2.163417 | down | coding | NM_001010915 | PTPLAD2  | chr9 | - |
| ASHG19A3A037248 | 0.043566 | 0.248267 | 3.04867  | down | coding | NM_001497    | B4GALT1  | chr9 | - |
| ASHG19A3A037277 | 0.030504 | 0.212948 | 2.030394 | down | coding | NM_147202    | C9orf25  | chr9 | - |
| ASHG19A3A037301 | 0.00789  | 0.117056 | 10.56445 | down | coding | NM_025182    | KIAA1539 | chr9 | - |
| ASHG19A3A037311 | 0.00355  | 0.083557 | 10.56885 | down | coding | NM_213674    | TPM2     | chr9 | - |
| ASHG19A3A037312 | 0.006867 | 0.110159 | 4.468755 | down | coding | NM_003289    | TPM2     | chr9 | - |
| ASHG19A3A037430 | 0.02059  | 0.178028 | 7.663465 | down | coding | NM_052943    | FAM46B   | chr1 | - |
| ASHG19A3A037557 | 0.018086 | 0.167574 | 6.808095 | down | coding | NM_001206    | KLF9     | chr9 | - |
| ASHG19A3A037602 | 0.017552 | 0.165417 | 2.128884 | down | coding | NM_002072    | GNAQ     | chr9 | - |
| ASHG19A3A037736 | 3.46E-05 | 0.016267 | 2.269972 | down | coding | NM_000507    | FBP1     | chr9 | - |
| ASHG19A3A037801 | 0.014239 | 0.150593 | 3.998112 | down | coding | NM_018421    | TBC1D2   | chr9 | - |
| ASHG19A3A037895 | 0.003269 | 0.082065 | 3.88035  | down | coding | NM_057159    | LPAR1    | chr9 | - |
| ASHG19A3A038025 | 0.01656  | 0.160581 | 10.50998 | down | coding | NM_001017403 | LGR6     | chr1 | + |

|                 |          |          |          |      |        |              |          |      |   |
|-----------------|----------|----------|----------|------|--------|--------------|----------|------|---|
| ASHG19A3A038049 | 6.97E-05 | 0.022087 | 6.208708 | down | coding | NM_012098    | ANGPTL2  | chr9 | - |
| ASHG19A3A038064 | 0.002574 | 0.072555 | 3.02297  | down | coding | NM_000118    | ENG      | chr9 | - |
| ASHG19A3A038109 | 0.007092 | 0.111447 | 2.077915 | down | coding | NM_199350    | C9orf50  | chr9 | - |
| ASHG19A3A038368 | 0.022748 | 0.18676  | 3.277456 | down | coding | NM_203403    | C9orf150 | chr9 | + |
| ASHG19A3A038405 | 0.000294 | 0.031809 | 2.102121 | down | coding | NM_006570    | RRAGA    | chr9 | + |
| ASHG19A3A038511 | 0.01185  | 0.138013 | 4.549587 | down | coding | NM_004512    | IL11RA   | chr9 | + |
| ASHG19A3A038532 | 0.047052 | 0.257805 | 2.635921 | down | coding | NM_174923    | CCDC107  | chr9 | + |
| ASHG19A3A038534 | 0.004231 | 0.089521 | 2.920781 | down | coding | NM_006368    | CREB3    | chr9 | + |
| ASHG19A3A038550 | 0.006307 | 0.105194 | 4.219159 | down | coding | NM_021111    | RECK     | chr9 | + |
| ASHG19A3A038551 | 0.004535 | 0.093019 | 14.62378 | down | coding | NM_022343    | GLIPR2   | chr9 | + |
| ASHG19A3A038825 | 0.007997 | 0.117056 | 8.673454 | down | coding | NM_007005    | TLE4     | chr9 | + |
| ASHG19A3A038881 | 0.005586 | 0.100699 | 5.932941 | down | coding | NM_001912    | CTSL1    | chr9 | + |
| ASHG19A3A038988 | 0.026816 | 0.200714 | 2.419252 | down | coding | NM_014282    | HABP4    | chr9 | + |
| ASHG19A3A039024 | 0.035725 | 0.227467 | 3.233698 | down | coding | NM_004612    | TGFBR1   | chr9 | + |
| ASHG19A3A039115 | 0.045279 | 0.253239 | 2.450998 | down | coding | NM_003358    | UGCG     | chr9 | + |
| ASHG19A3A039192 | 0.00032  | 0.032699 | 4.843355 | down | coding | NM_000962    | PTGS1    | chr9 | + |
| ASHG19A3A039243 | 0.00799  | 0.117056 | 4.366135 | down | coding | NM_006195    | PBX3     | chr9 | + |
| ASHG19A3A039339 | 0.001356 | 0.055969 | 2.423662 | down | coding | NM_001128826 | NCS1     | chr9 | + |
| ASHG19A3A039355 | 0.002551 | 0.072451 | 104.7863 | down | coding | NM_032728    | PPAPDC3  | chr9 | + |
| ASHG19A3A039444 | 0.011599 | 0.136714 | 4.430513 | down | coding | NM_019605    | SERTAD4  | chr1 | + |
| ASHG19A3A039631 | 0.039109 | 0.236631 | 3.827075 | down | coding | NM_003916    | AP1S2    | chrX | - |
| ASHG19A3A039846 | 0.005973 | 0.103105 | 5.063957 | down | coding | NM_005660    | SLC35A2  | chrX | - |
| ASHG19A3A039857 | 0.015815 | 0.157775 | 7.571084 | down | coding | NM_007213    | PRAF2    | chrX | - |
| ASHG19A3A039885 | 0.000131 | 0.026643 | 63.95008 | down | coding | NM_018159    | NUDT11   | chrX | - |
| ASHG19A3A040051 | 0.039427 | 0.236991 | 6.08586  | down | coding | NM_001024455 | RGAG4    | chrX | - |
| ASHG19A3A040105 | 0.029961 | 0.211328 | 7.766286 | down | coding | NM_001029891 | PGAM4    | chrX | - |
| ASHG19A3A040194 | 0.026255 | 0.198323 | 2.301986 | down | coding | NM_019007    | ARMCX6   | chrX | - |
| ASHG19A3A040428 | 0.025184 | 0.195011 | 12.97502 | down | coding | NM_001078172 | FAM127B  | chrX | - |
| ASHG19A3A040448 | 0.024542 | 0.19336  | 3.559909 | down | coding | NM_001173517 | MAP7D3   | chrX | - |
| ASHG19A3A040452 | 0.006816 | 0.109609 | 3.712542 | down | coding | NM_004840    | ARHGEF6  | chrX | - |
| ASHG19A3A040453 | 0.005942 | 0.103084 | 18.5076  | down | coding | NM_001146068 | CAPN2    | chr1 | + |
| ASHG19A3A040501 | 0.000642 | 0.042495 | 2.422272 | down | coding | NM_000202    | IDS      | chrX | - |
| ASHG19A3A040519 | 0.021844 | 0.182909 | 4.290939 | down | coding | NM_031462    | CD99L2   | chrX | - |

|                 |          |          |          |      |        |              |          |       |   |
|-----------------|----------|----------|----------|------|--------|--------------|----------|-------|---|
| ASHG19A3A040566 | 0.008773 | 0.12054  | 3.402281 | down | coding | NM_003676    | DEGS1    | chr1  | + |
| ASHG19A3A040578 | 0.003792 | 0.086533 | 2.29095  | down | coding | NM_001110556 | FLNA     | chrX  | - |
| ASHG19A3A040898 | 0.031871 | 0.21579  | 3.985531 | down | coding | NM_019886    | CHST7    | chrX  | + |
| ASHG19A3A040920 | 0.025376 | 0.195453 | 3.77601  | down | coding | NM_003254    | TIMP1    | chrX  | + |
| ASHG19A3A041057 | 0.002908 | 0.078231 | 25.75565 | down | coding | NM_001039705 | TRO      | chrX  | + |
| ASHG19A3A041067 | 0.019064 | 0.172191 | 2.487232 | down | coding | NM_016656    | RRAGB    | chrX  | + |
| ASHG19A3A041239 | 0.021526 | 0.182164 | 2.63584  | down | coding | NM_003022    | SH3BGRL  | chrX  | + |
| ASHG19A3A041336 | 0.000404 | 0.034548 | 26.74027 | down | coding | NM_152278    | TCEAL7   | chrX  | + |
| ASHG19A3A041337 | 0.000106 | 0.024093 | 3.159613 | down | coding | NM_001006612 | WBP5     | chrX  | + |
| ASHG19A3A041403 | 0.007623 | 0.115303 | 2.46027  | down | coding | NM_002578    | PAK3     | chrX  | + |
| ASHG19A3A041518 | 0.013968 | 0.149715 | 8.496425 | down | coding | NM_004794    | RAB33A   | chrX  | + |
| ASHG19A3A041522 | 0.034393 | 0.224033 | 3.611615 | down | coding | NM_004481    | GALNT2   | chr1  | + |
| ASHG19A3A041548 | 0.020507 | 0.177561 | 2.311899 | down | coding | NM_001101357 | CCDC160  | chrX  | + |
| ASHG19A3A041642 | 0.035639 | 0.227147 | 3.327739 | down | coding | NM_001012989 | UBE2NL   | chrX  | + |
| ASHG19A3A042257 | 0.004771 | 0.093712 | 3.918635 | down | coding | NM_014654    | SDC3     | chr1  | - |
| ASHG19A3A042281 | 0.031558 | 0.214507 | 2.323813 | down | coding | NM_001139459 | CNST     | chr1  | + |
| ASHG19A3A042282 | 0.000317 | 0.032699 | 2.404253 | down | coding | NM_152609    | CNST     | chr1  | + |
| ASHG19A3A042390 | 0.000154 | 0.026643 | 10.49203 | down | coding | NM_004102    | FABP3    | chr1  | - |
| ASHG19A3A042489 | 0.005722 | 0.101746 | 3.48583  | down | coding | NM_012425    | RSU1     | chr10 | - |
| ASHG19A3A042497 | 7.98E-05 | 0.023121 | 6.452189 | down | coding | NM_014241    | PTPLA    | chr10 | - |
| ASHG19A3A042572 | 0.001376 | 0.056327 | 4.442615 | down | coding | NM_020848    | KIAA1462 | chr10 | - |
| ASHG19A3A042601 | 0.003192 | 0.081478 | 90.5494  | down | coding | NM_144569    | SPOCD1   | chr1  | - |
| ASHG19A3A042613 | 0.011792 | 0.137852 | 3.40167  | down | coding | NM_003873    | NRP1     | chr10 | - |
| ASHG19A3A042614 | 0.008767 | 0.12054  | 8.687599 | down | coding | NM_001024628 | NRP1     | chr10 | - |
| ASHG19A3A042623 | 0.024568 | 0.19336  | 11.78096 | down | coding | NM_031866    | FZD8     | chr10 | - |
| ASHG19A3A042636 | 0.031447 | 0.214448 | 2.015793 | down | coding | NM_145011    | ZNF25    | chr10 | - |
| ASHG19A3A042684 | 0.023113 | 0.188346 | 5.448168 | down | coding | NM_199168    | CXCL12   | chr10 | - |
| ASHG19A3A042721 | 0.020343 | 0.177153 | 3.10462  | down | coding | NM_181519    | SYT15    | chr10 | - |
| ASHG19A3A042722 | 0.005078 | 0.096773 | 6.395641 | down | coding | NM_031912    | SYT15    | chr10 | - |
| ASHG19A3A042756 | 0.049397 | 0.263826 | 7.524637 | down | coding | NM_021226    | ARHGAP22 | chr10 | - |
| ASHG19A3A042839 | 2.19E-05 | 0.016153 | 15.47505 | down | coding | NM_030786    | SYNC     | chr1  | - |
| ASHG19A3A042908 | 0.049619 | 0.263911 | 3.160287 | down | coding | NM_001142648 | SARIA    | chr10 | - |
| ASHG19A3A042952 | 0.002137 | 0.067858 | 2.327913 | down | coding | NM_001142353 | PPP3CB   | chr10 | - |

|                 |          |          |          |      |        |              |          |       |   |
|-----------------|----------|----------|----------|------|--------|--------------|----------|-------|---|
| ASHG19A3A043001 | 0.001713 | 0.061148 | 160.7367 | down | coding | NM_002247    | KCNMA1   | chr10 | - |
| ASHG19A3A043015 | 0.007604 | 0.115107 | 9.846286 | down | coding | NM_153367    | ZCCHC24  | chr10 | - |
| ASHG19A3A043062 | 0.013718 | 0.148408 | 2.584916 | down | coding | NM_005271    | GLUD1    | chr10 | - |
| ASHG19A3A043081 | 0.001379 | 0.056327 | 5.220418 | down | coding | NM_001141945 | ACTA2    | chr10 | - |
| ASHG19A3A043102 | 0.00077  | 0.045376 | 184.3236 | down | coding | NM_005398    | PPP1R3C  | chr10 | - |
| ASHG19A3A043121 | 0.040342 | 0.23928  | 3.607348 | down | coding | NM_013451    | MYOF     | chr10 | - |
| ASHG19A3A043177 | 0.008905 | 0.121637 | 2.648559 | down | coding | NM_021732    | AVPI1    | chr10 | - |
| ASHG19A3A043249 | 0.03057  | 0.212961 | 2.191981 | down | coding | NM_005736    | ACTR1A   | chr10 | - |
| ASHG19A3A043352 | 0.014945 | 0.153769 | 2.289507 | down | coding | NM_004248    | PRLHR    | chr10 | - |
| ASHG19A3A043376 | 0.013115 | 0.144029 | 3.171126 | down | coding | NM_000141    | FGFR2    | chr10 | - |
| ASHG19A3A043385 | 0.003446 | 0.083068 | 2.405912 | down | coding | NM_145047    | OSCP1    | chr1  | - |
| ASHG19A3A043455 | 0.012622 | 0.141741 | 18.29296 | down | coding | NM_004052    | BNIP3    | chr10 | - |
| ASHG19A3A043807 | 0.041606 | 0.242668 | 2.003132 | down | coding | NM_004468    | FHL3     | chr1  | - |
| ASHG19A3A043843 | 0.000598 | 0.040795 | 2.796534 | down | coding | NM_022157    | RRAGC    | chr1  | - |
| ASHG19A3A044001 | 0.021909 | 0.182965 | 8.046678 | down | coding | NM_032199    | ARID5B   | chr10 | + |
| ASHG19A3A044047 | 0.005292 | 0.098774 | 55.29548 | down | coding | NM_002727    | SRGN     | chr10 | + |
| ASHG19A3A044069 | 0.001704 | 0.061023 | 3.036505 | down | coding | NM_004096    | EIF4EBP2 | chr10 | + |
| ASHG19A3A044124 | 0.00957  | 0.125552 | 5.363882 | down | coding | NM_014000    | VCL      | chr10 | + |
| ASHG19A3A044261 | 0.027583 | 0.202826 | 7.48637  | down | coding | NM_152871    | FAS      | chr10 | + |
| ASHG19A3A044357 | 0.027066 | 0.201258 | 2.579106 | down | coding | NM_024954    | UBTD1    | chr10 | + |
| ASHG19A3A044364 | 0.00073  | 0.044771 | 3.158799 | down | coding | NM_031484    | MARVELD1 | chr10 | + |
| ASHG19A3A044432 | 0.000957 | 0.050231 | 2.229799 | down | coding | NM_001083913 | C10orf26 | chr10 | + |
| ASHG19A3A044444 | 0.000345 | 0.033308 | 16.36369 | down | coding | NM_032727    | INA      | chr10 | + |
| ASHG19A3A044526 | 0.010582 | 0.131111 | 2.78003  | down | coding | NM_020940    | FAM160B1 | chr10 | + |
| ASHG19A3A044564 | 0.010358 | 0.129692 | 3.223377 | down | coding | NM_005308    | GRK5     | chr10 | + |
| ASHG19A3A044671 | 0.011612 | 0.136714 | 3.667148 | down | coding | NM_001143759 | LRRC27   | chr10 | + |
| ASHG19A3A044676 | 0.038285 | 0.234392 | 2.301417 | down | coding | NM_005539    | INPP5A   | chr10 | + |
| ASHG19A3A044679 | 0.018632 | 0.170157 | 2.298812 | down | coding | NM_001146310 | C1orf86  | chr1  | - |
| ASHG19A3A044686 | 0.023735 | 0.190457 | 2.250355 | down | coding | NM_152911    | PAOX     | chr10 | + |
| ASHG19A3A044851 | 0.02789  | 0.203809 | 7.031557 | down | coding | NM_145053    | UBQLNL   | chr11 | - |
| ASHG19A3A044872 | 0.028891 | 0.208216 | 18.21071 | down | coding | NM_145040    | PRKCDBP  | chr11 | - |
| ASHG19A3A044921 | 0.001271 | 0.054115 | 9.585355 | down | coding | NM_020645    | NRIP3    | chr11 | - |
| ASHG19A3A044924 | 0.018605 | 0.17012  | 2.296214 | down | coding | NM_015213    | DENND5A  | chr11 | - |

|                 |          |          |          |      |        |              |          |       |   |
|-----------------|----------|----------|----------|------|--------|--------------|----------|-------|---|
| ASHG19A3A044947 | 0.000177 | 0.026643 | 6.305115 | down | coding | NM_013253    | DKK3     | chr11 | - |
| ASHG19A3A045029 | 0.008354 | 0.118817 | 3.132064 | down | coding | NM_001143816 | BDNF     | chr11 | - |
| ASHG19A3A045190 | 0.013089 | 0.143918 | 3.719923 | down | coding | NM_004223    | UBE2L6   | chr11 | - |
| ASHG19A3A045240 | 0.021353 | 0.181535 | 5.158592 | down | coding | NM_016582    | SLC15A3  | chr11 | - |
| ASHG19A3A045258 | 0.003254 | 0.082065 | 2.348484 | down | coding | NM_021727    | FADS3    | chr11 | - |
| ASHG19A3A045265 | 0.00195  | 0.064771 | 4.253802 | down | coding | NM_001620    | AHNAK    | chr11 | - |
| ASHG19A3A045339 | 0.040804 | 0.240602 | 4.757027 | down | coding | NM_006795    | EHD1     | chr11 | - |
| ASHG19A3A045371 | 0.001155 | 0.053318 | 58.04928 | down | coding | NM_016938    | EFEMP2   | chr11 | - |
| ASHG19A3A045382 | 0.000868 | 0.047926 | 715.2116 | down | coding | NM_020404    | CD248    | chr11 | - |
| ASHG19A3A045394 | 0.016865 | 0.162612 | 102.0806 | down | coding | NM_003793    | CTSF     | chr11 | - |
| ASHG19A3A045506 | 0.017007 | 0.163243 | 12.97556 | down | coding | NM_207577    | MAP6     | chr11 | - |
| ASHG19A3A045528 | 0.009284 | 0.123519 | 3.535499 | down | coding | NM_001029859 | KCTD21   | chr11 | - |
| ASHG19A3A045567 | 0.015128 | 0.154496 | 3.98639  | down | coding | NM_012193    | FZD4     | chr11 | - |
| ASHG19A3A045579 | 0.03813  | 0.234    | 20.73116 | down | coding | NM_002867    | RAB3B    | chr1  | - |
| ASHG19A3A045645 | 0.001526 | 0.058898 | 12.81139 | down | coding | NM_033292    | CASP1    | chr11 | - |
| ASHG19A3A045646 | 0.010446 | 0.130193 | 33.6623  | down | coding | NM_052889    | CARD16   | chr11 | - |
| ASHG19A3A045776 | 0.028291 | 0.205706 | 18.69746 | down | coding | NM_006500    | MCAM     | chr11 | - |
| ASHG19A3A045780 | 0.010636 | 0.131368 | 9.317824 | down | coding | NM_015645    | C1QTNF5  | chr11 | - |
| ASHG19A3A045845 | 0.000161 | 0.026643 | 6.092506 | down | coding | NM_022549    | FEZ1     | chr11 | - |
| ASHG19A3A046024 | 0.028851 | 0.208007 | 2.463245 | down | coding | NM_003156    | STIM1    | chr11 | + |
| ASHG19A3A046069 | 7.08E-05 | 0.022087 | 35.64395 | down | coding | NM_006074    | TRIM22   | chr11 | + |
| ASHG19A3A046087 | 0.000186 | 0.027342 | 14.50557 | down | coding | NM_000543    | SMPD1    | chr11 | + |
| ASHG19A3A046136 | 0.027806 | 0.203809 | 5.459568 | down | coding | NM_001124    | ADM      | chr11 | + |
| ASHG19A3A046159 | 0.00023  | 0.029723 | 3.703791 | down | coding | NM_018222    | PARVA    | chr11 | + |
| ASHG19A3A046179 | 0.005306 | 0.09884  | 2.538053 | down | coding | NM_005013    | NUCB2    | chr11 | + |
| ASHG19A3A046309 | 0.046024 | 0.255048 | 2.660402 | down | coding | NM_003713    | PPAP2B   | chr1  | - |
| ASHG19A3A046349 | 0.00188  | 0.063466 | 3.821902 | down | coding | NM_001128225 | SLC39A13 | chr11 | + |
| ASHG19A3A046491 | 0.0102   | 0.128875 | 3.556099 | down | coding | NM_004265    | FADS2    | chr11 | + |
| ASHG19A3A046569 | 0.004673 | 0.093229 | 3.493907 | down | coding | NM_006244    | PPP2R5B  | chr11 | + |
| ASHG19A3A046718 | 0.006265 | 0.105194 | 6.068674 | down | coding | NM_000804    | FOLR3    | chr11 | + |
| ASHG19A3A046732 | 0.030497 | 0.212948 | 2.697763 | down | coding | NM_002564    | P2RY2    | chr11 | + |
| ASHG19A3A046770 | 0.003541 | 0.083557 | 3.661512 | down | coding | NM_001235    | SERPINH1 | chr11 | + |
| ASHG19A3A046811 | 0.005434 | 0.099637 | 2.554982 | down | coding | NM_182603    | ANKRD42  | chr11 | + |

|                 |          |          |          |      |        |              |           |       |   |
|-----------------|----------|----------|----------|------|--------|--------------|-----------|-------|---|
| ASHG19A3A046828 | 0.020923 | 0.179763 | 12.36944 | down | coding | NM_007173    | PRSS23    | chr11 | + |
| ASHG19A3A046911 | 0.004585 | 0.093019 | 2.009219 | down | coding | NM_015139    | SLC35D1   | chr1  | - |
| ASHG19A3A046937 | 6.32E-06 | 0.009072 | 68.44048 | down | coding | NM_178834    | LAYN      | chr11 | + |
| ASHG19A3A046962 | 0.011322 | 0.135345 | 2.024838 | down | coding | NM_024911    | WLS       | chr1  | - |
| ASHG19A3A046992 | 0.025016 | 0.194589 | 2.533382 | down | coding | NM_001040455 | SIDT2     | chr11 | + |
| ASHG19A3A047043 | 0.013069 | 0.143918 | 3.817527 | down | coding | NM_178507    | OAF       | chr11 | + |
| ASHG19A3A047221 | 0.049673 | 0.26395  | 2.648783 | down | coding | NM_001065    | TNFRSF1A  | chr12 | - |
| ASHG19A3A047232 | 0.007035 | 0.111447 | 2.242982 | down | coding | NM_001039670 | IFFO1     | chr12 | - |
| ASHG19A3A047256 | 0.001137 | 0.053195 | 6.944378 | down | coding | NM_001733    | C1R       | chr12 | - |
| ASHG19A3A047323 | 0.006681 | 0.108511 | 2.735065 | down | coding | NM_007244    | PRR4      | chr12 | - |
| ASHG19A3A047338 | 0.000322 | 0.032699 | 7.240738 | down | coding | NM_002723    | PRB4      | chr12 | - |
| ASHG19A3A047351 | 0.010777 | 0.132128 | 2.25563  | down | coding | NM_015987    | HEBP1     | chr12 | - |
| ASHG19A3A047530 | 0.01689  | 0.162612 | 2.843099 | down | coding | NM_024686    | TLL7      | chr1  | - |
| ASHG19A3A047558 | 0.00251  | 0.071789 | 17.59148 | down | coding | NM_006009    | TUBA1A    | chr12 | - |
| ASHG19A3A047585 | 0.005945 | 0.103084 | 2.605793 | down | coding | NM_004388    | CTBS      | chr1  | - |
| ASHG19A3A047635 | 0.01564  | 0.156921 | 2.483201 | down | coding | NM_006301    | MAP3K12   | chr12 | - |
| ASHG19A3A047660 | 0.003374 | 0.083054 | 32.81092 | down | coding | NM_002205    | ITGA5     | chr12 | - |
| ASHG19A3A047676 | 0.001003 | 0.051205 | 3.127209 | down | coding | NM_001040034 | CD63      | chr12 | - |
| ASHG19A3A047681 | 0.00056  | 0.039779 | 6.902719 | down | coding | NM_002429    | MMP19     | chr12 | - |
| ASHG19A3A047740 | 0.016086 | 0.158683 | 2.614929 | down | coding | NM_005730    | CTDSP2    | chr12 | - |
| ASHG19A3A047766 | 0.014419 | 0.151849 | 2.485784 | down | coding | NM_002076    | GNS       | chr12 | - |
| ASHG19A3A047884 | 0.000205 | 0.028229 | 22.29165 | down | coding | NM_001920    | DCN       | chr12 | - |
| ASHG19A3A047911 | 0.024184 | 0.19176  | 8.993002 | down | coding | NM_021229    | NTN4      | chr12 | - |
| ASHG19A3A047915 | 0.023531 | 0.189657 | 2.951449 | down | coding | NM_002595    | CDK17     | chr12 | - |
| ASHG19A3A047933 | 0.004593 | 0.093019 | 2.045078 | down | coding | NM_015054    | UHRF1BP1L | chr12 | - |
| ASHG19A3A047942 | 0.001219 | 0.054115 | 18.22883 | down | coding | NM_018284    | GBP3      | chr1  | - |
| ASHG19A3A047965 | 0.01412  | 0.150369 | 2.300149 | down | coding | NM_018171    | APPL2     | chr12 | - |
| ASHG19A3A047967 | 0.008283 | 0.11853  | 2.53755  | down | coding | NM_006825    | CKAP4     | chr12 | - |
| ASHG19A3A047984 | 0.017553 | 0.165417 | 54.34435 | down | coding | NM_181724    | TMEM119   | chr12 | - |
| ASHG19A3A047995 | 0.002947 | 0.079182 | 3.223822 | down | coding | NM_031954    | KCTD10    | chr12 | - |
| ASHG19A3A048000 | 0.003975 | 0.087853 | 2.092169 | down | coding | NM_016433    | GLTP      | chr12 | - |
| ASHG19A3A048017 | 0.043805 | 0.249089 | 2.190144 | down | coding | NM_002973    | ATXN2     | chr12 | - |
| ASHG19A3A048074 | 8.04E-06 | 0.010094 | 6.259546 | down | coding | NM_016281    | TAOK3     | chr12 | - |

|                 |          |          |          |      |        |              |           |       |   |
|-----------------|----------|----------|----------|------|--------|--------------|-----------|-------|---|
| ASHG19A3A048109 | 0.016846 | 0.162612 | 3.530563 | down | coding | NM_172215    | CAMKK2    | chr12 | - |
| ASHG19A3A048145 | 0.001563 | 0.059794 | 8.580439 | down | coding | NM_025140    | CCDC92    | chr12 | - |
| ASHG19A3A048232 | 0.001525 | 0.058898 | 4.34948  | down | coding | NM_001006605 | FAM69A    | chr1  | - |
| ASHG19A3A048257 | 0.001591 | 0.059794 | 12.46401 | down | coding | NM_001102654 | NTF3      | chr12 | + |
| ASHG19A3A048307 | 0.00347  | 0.083068 | 4.445485 | down | coding | NM_201442    | C1S       | chr12 | + |
| ASHG19A3A048365 | 0.005618 | 0.100699 | 7.895562 | down | coding | NM_031412    | GABARAPL1 | chr12 | + |
| ASHG19A3A048543 | 0.03114  | 0.214234 | 9.412302 | down | coding | NM_001013635 | C12orf68  | chr12 | + |
| ASHG19A3A048551 | 0.01891  | 0.171542 | 2.069129 | down | coding | NM_000725    | CACNB3    | chr12 | + |
| ASHG19A3A048572 | 3.4E-06  | 0.007121 | 2.293371 | down | coding | NM_001031698 | PRPF40B   | chr12 | + |
| ASHG19A3A048598 | 0.003137 | 0.081034 | 9.439014 | down | coding | NM_000110    | DPYD      | chr1  | - |
| ASHG19A3A048613 | 0.038134 | 0.234    | 8.348493 | down | coding | NM_181711    | GRASP     | chr12 | + |
| ASHG19A3A048645 | 0.002282 | 0.069865 | 3.274397 | down | coding | NM_138473    | SP1       | chr12 | + |
| ASHG19A3A048739 | 0.015421 | 0.15563  | 2.10723  | down | coding | NM_002332    | LRP1      | chr12 | + |
| ASHG19A3A048794 | 0.009389 | 0.12425  | 2.138952 | down | coding | NM_020762    | SRGAP1    | chr12 | + |
| ASHG19A3A048805 | 0.001259 | 0.054115 | 17.5001  | down | coding | NM_001031679 | MSRB3     | chr12 | + |
| ASHG19A3A048832 | 0.030099 | 0.211898 | 2.268722 | down | coding | NM_002392    | MDM2      | chr12 | + |
| ASHG19A3A048866 | 0.000697 | 0.044208 | 140.2249 | down | coding | NM_006851    | GLIPR1    | chr12 | + |
| ASHG19A3A048984 | 0.011941 | 0.138464 | 5.153988 | down | coding | NM_001008394 | EID3      | chr12 | + |
| ASHG19A3A049006 | 0.000728 | 0.044771 | 5.87492  | down | coding | NM_152261    | C12orf23  | chr12 | + |
| ASHG19A3A049014 | 0.008259 | 0.118461 | 4.991582 | down | coding | NM_007076    | FICD      | chr12 | + |
| ASHG19A3A049046 | 0.02764  | 0.203009 | 2.628468 | down | coding | NM_005475    | SH2B3     | chr12 | + |
| ASHG19A3A049115 | 0.005644 | 0.100942 | 3.492489 | down | coding | NM_001037494 | DYNLL1    | chr12 | + |
| ASHG19A3A049137 | 0.039133 | 0.236631 | 2.474447 | down | coding | NM_002813    | PSMD9     | chr12 | + |
| ASHG19A3A049140 | 0.011112 | 0.133887 | 4.400651 | down | coding | NM_144668    | WDR66     | chr12 | + |
| ASHG19A3A049204 | 0.026391 | 0.198669 | 2.177038 | down | coding | NM_002959    | SORT1     | chr1  | - |
| ASHG19A3A049279 | 0.009998 | 0.127458 | 9.932413 | down | coding | NM_000849    | GSTM3     | chr1  | - |
| ASHG19A3A049379 | 0.028728 | 0.20736  | 5.710613 | down | coding | NM_004696    | SLC16A4   | chr1  | - |
| ASHG19A3A049418 | 0.016385 | 0.159873 | 5.884577 | down | coding | NM_178006    | STARD13   | chr13 | - |
| ASHG19A3A049469 | 0.000156 | 0.026643 | 13.12496 | down | coding | NM_005780    | LHFP      | chr13 | - |
| ASHG19A3A049514 | 0.025542 | 0.196375 | 2.273028 | down | coding | NM_183422    | TSC22D1   | chr13 | - |
| ASHG19A3A049552 | 0.013009 | 0.143683 | 2.688115 | down | coding | NM_001268    | RCBTB2    | chr13 | - |
| ASHG19A3A049824 | 0.004287 | 0.090264 | 9.774613 | down | coding | NM_001080396 | FAM155A   | chr13 | - |
| ASHG19A3A049875 | 0.024098 | 0.191703 | 4.994802 | down | coding | NM_000820    | GAS6      | chr13 | - |



|                 |          |          |          |      |        |              |           |       |   |
|-----------------|----------|----------|----------|------|--------|--------------|-----------|-------|---|
| ASHG19A3A050489 | 0.003045 | 0.080155 | 5.404711 | down | coding | NM_181864    | ACOT7     | chr1  | - |
| ASHG19A3A050517 | 0.013937 | 0.149462 | 2.484791 | down | coding | NM_017905    | TMCO3     | chr13 | + |
| ASHG19A3A050578 | 0.010974 | 0.133155 | 19.57444 | down | coding | NM_005407    | SALL2     | chr14 | - |
| ASHG19A3A050580 | 0.037855 | 0.233426 | 2.27053  | down | coding | NM_001005466 | OR10G2    | chr14 | - |
| ASHG19A3A050698 | 0.018763 | 0.170791 | 8.528029 | down | coding | NM_138638    | CFL2      | chr14 | - |
| ASHG19A3A050723 | 0.022549 | 0.186    | 4.961623 | down | coding | NM_006364    | SEC23A    | chr14 | - |
| ASHG19A3A050836 | 0.002956 | 0.079219 | 3.436699 | down | coding | NM_022571    | GPR135    | chr14 | - |
| ASHG19A3A050837 | 0.006768 | 0.109302 | 5.848105 | down | coding | NM_144581    | C14orf149 | chr14 | - |
| ASHG19A3A050893 | 0.007136 | 0.11153  | 2.445293 | down | coding | NM_015994    | ATP6V1D   | chr14 | - |
| ASHG19A3A050939 | 0.004607 | 0.093019 | 9.771679 | down | coding | NM_012074    | DPF3      | chr14 | - |
| ASHG19A3A050953 | 4.92E-05 | 0.019284 | 2.556939 | down | coding | NM_006029    | PNMA1     | chr14 | - |
| ASHG19A3A050959 | 0.000768 | 0.045376 | 2.947979 | down | coding | NM_152445    | FAM161B   | chr14 | - |
| ASHG19A3A050969 | 0.010234 | 0.128875 | 8.195278 | down | coding | NM_000428    | LTBP2     | chr14 | - |
| ASHG19A3A050984 | 0.005973 | 0.103105 | 3.048012 | down | coding | NM_006827    | TMED10    | chr14 | - |
| ASHG19A3A051028 | 0.000278 | 0.031138 | 2.179028 | down | coding | NM_005065    | SEL1L     | chr14 | - |
| ASHG19A3A051063 | 0.021814 | 0.182857 | 2.233343 | down | coding | NM_001002811 | PDE4DIP   | chr1  | - |
| ASHG19A3A051066 | 0.010517 | 0.130747 | 17.05519 | down | coding | NM_001002810 | PDE4DIP   | chr1  | - |
| ASHG19A3A051069 | 0.000399 | 0.034548 | 7.749404 | down | coding | NM_006329    | FBLN5     | chr14 | - |
| ASHG19A3A051070 | 0.008125 | 0.117704 | 2.339068 | down | coding | NM_004239    | TRIP11    | chr14 | - |
| ASHG19A3A051091 | 0.000614 | 0.041451 | 3.263726 | down | coding | NM_032036    | IFI27L2   | chr14 | - |
| ASHG19A3A051188 | 0.005904 | 0.103057 | 18.15518 | down | coding | NM_138420    | AHNAK2    | chr14 | - |
| ASHG19A3A051263 | 0.043314 | 0.24778  | 2.105618 | down | coding | NM_014828    | TOX4      | chr14 | + |
| ASHG19A3A051286 | 0.005607 | 0.100699 | 4.6301   | down | coding | NM_014045    | LRP10     | chr14 | + |
| ASHG19A3A051291 | 0.032907 | 0.21918  | 2.53908  | down | coding | NM_017924    | C14orf119 | chr14 | + |
| ASHG19A3A051293 | 0.020207 | 0.176751 | 2.046807 | down | coding | NM_004050    | BCL2L2    | chr14 | + |
| ASHG19A3A051353 | 0.003891 | 0.086787 | 2.618133 | down | coding | NM_007077    | AP4S1     | chr14 | + |
| ASHG19A3A051396 | 0.008231 | 0.118382 | 2.7266   | down | coding | NM_001017923 | C14orf28  | chr14 | + |
| ASHG19A3A051405 | 0.03153  | 0.214448 | 2.269678 | down | coding | NM_172193    | KLHDC1    | chr14 | + |
| ASHG19A3A051428 | 0.004909 | 0.094909 | 29.47624 | down | coding | NM_000956    | PTGER2    | chr14 | + |
| ASHG19A3A051467 | 0.008767 | 0.12054  | 2.158711 | down | coding | NM_018477    | ACTR10    | chr14 | + |
| ASHG19A3A051523 | 0.036033 | 0.228089 | 3.752528 | down | coding | NM_014950    | ZBTB1     | chr14 | + |
| ASHG19A3A051583 | 0.00886  | 0.121169 | 2.436949 | down | coding | NM_000021    | PSEN1     | chr14 | + |
| ASHG19A3A051621 | 0.002664 | 0.074104 | 3.589258 | down | coding | NM_001024599 | HIST2H2BF | chr1  | - |

|                 |          |          |          |      |        |              |           |       |   |
|-----------------|----------|----------|----------|------|--------|--------------|-----------|-------|---|
| ASHG19A3A051653 | 0.024677 | 0.193389 | 4.431399 | down | coding | NM_003528    | HIST2H2BE | chr1  | - |
| ASHG19A3A051748 | 0.001891 | 0.063466 | 22.99529 | down | coding | NM_000710    | BDKRB1    | chr14 | + |
| ASHG19A3A051814 | 0.044538 | 0.251142 | 2.992196 | down | coding | NM_001172631 | TECPR2    | chr14 | + |
| ASHG19A3A051835 | 0.013069 | 0.143918 | 2.254791 | down | coding | NM_005552    | KLC1      | chr14 | + |
| ASHG19A3A051836 | 0.002403 | 0.070943 | 2.658431 | down | coding | NM_001130107 | KLC1      | chr14 | + |
| ASHG19A3A051871 | 0.022572 | 0.186    | 7.187081 | down | coding | NM_000396    | CTSK      | chr1  | - |
| ASHG19A3A051927 | 0.032375 | 0.216983 | 2.149348 | down | coding | NM_000814    | GABRB3    | chr15 | - |
| ASHG19A3A051965 | 0.040933 | 0.24078  | 2.13723  | down | coding | NM_020371    | AVEN      | chr15 | - |
| ASHG19A3A052110 | 0.048409 | 0.261704 | 2.723793 | down | coding | NM_013309    | SLC30A4   | chr15 | - |
| ASHG19A3A052122 | 0.005362 | 0.099072 | 3.288277 | down | coding | NM_203349    | SHC4      | chr15 | - |
| ASHG19A3A052136 | 0.00165  | 0.060728 | 3.182771 | down | coding | NM_032802    | SPPL2A    | chr15 | - |
| ASHG19A3A052142 | 0.005543 | 0.100597 | 2.254655 | down | coding | NM_153374    | LYSMD2    | chr15 | - |
| ASHG19A3A052240 | 0.005581 | 0.100699 | 3.857439 | down | coding | NM_015920    | RPS27L    | chr15 | - |
| ASHG19A3A052263 | 0.005408 | 0.09955  | 2.100691 | down | coding | NM_002537    | OAZ2      | chr15 | - |
| ASHG19A3A052368 | 0.004352 | 0.090758 | 4.342473 | down | coding | NM_004809    | STOML1    | chr15 | - |
| ASHG19A3A052390 | 0.017006 | 0.163243 | 2.247259 | down | coding | NM_005697    | SCAMP2    | chr15 | - |
| ASHG19A3A052410 | 0.009415 | 0.124339 | 7.672011 | down | coding | NM_001897    | CSPG4     | chr15 | - |
| ASHG19A3A052527 | 0.027196 | 0.201559 | 3.673299 | down | coding | NM_178232    | HAPLN3    | chr15 | - |
| ASHG19A3A052528 | 0.007056 | 0.111447 | 6.848945 | down | coding | NM_005928    | MFGE8     | chr15 | - |
| ASHG19A3A052728 | 0.011889 | 0.138293 | 9.322248 | down | coding | NM_001144757 | SCG5      | chr15 | + |
| ASHG19A3A052832 | 3.26E-05 | 0.016153 | 71.92554 | down | coding | NM_002373    | MAP1A     | chr15 | + |
| ASHG19A3A052865 | 0.033187 | 0.220296 | 3.59329  | down | coding | NM_021199    | SQRDL     | chr15 | + |
| ASHG19A3A052882 | 0.038798 | 0.23597  | 2.857623 | down | coding | NM_014335    | EID1      | chr15 | + |
| ASHG19A3A052896 | 0.029258 | 0.209498 | 2.999817 | down | coding | NM_007112    | THBS3     | chr1  | - |
| ASHG19A3A052962 | 0.007066 | 0.111447 | 30.81474 | down | coding | NM_001018020 | TPM1      | chr15 | + |
| ASHG19A3A052963 | 0.00642  | 0.106091 | 92.64877 | down | coding | NM_001018006 | TPM1      | chr15 | + |
| ASHG19A3A052965 | 0.031078 | 0.213987 | 8.39183  | down | coding | NM_001018008 | TPM1      | chr15 | + |
| ASHG19A3A052966 | 0.004258 | 0.089983 | 5.384413 | down | coding | NM_171846    | LACTB     | chr15 | + |
| ASHG19A3A052967 | 0.038562 | 0.235165 | 2.944278 | down | coding | NM_032857    | LACTB     | chr15 | + |
| ASHG19A3A052968 | 0.013084 | 0.143918 | 6.087493 | down | coding | NM_016530    | RAB8B     | chr15 | + |
| ASHG19A3A052969 | 0.005784 | 0.101967 | 6.504138 | down | coding | NM_031301    | APH1B     | chr15 | + |
| ASHG19A3A052978 | 0.049654 | 0.26395  | 3.0644   | down | coding | NM_025201    | PLEKHO2   | chr15 | + |
| ASHG19A3A052982 | 0.005324 | 0.09898  | 2.08936  | down | coding | NM_001101362 | KBTBD13   | chr15 | + |

|                 |          |          |          |      |        |              |          |       |   |
|-----------------|----------|----------|----------|------|--------|--------------|----------|-------|---|
| ASHG19A3A053051 | 0.005598 | 0.100699 | 2.296527 | down | coding | NM_001172624 | NEO1     | chr15 | + |
| ASHG19A3A053058 | 0.010307 | 0.12931  | 10.00434 | down | coding | NM_005576    | LOXL1    | chr15 | + |
| ASHG19A3A053061 | 0.022307 | 0.184784 | 2.400374 | down | coding | NM_033249    | PML      | chr15 | + |
| ASHG19A3A053080 | 0.002006 | 0.065872 | 2.745733 | down | coding | NM_001178111 | SCAMP5   | chr15 | + |
| ASHG19A3A053179 | 0.002569 | 0.072555 | 6.849242 | down | coding | NM_023003    | TM6SF1   | chr15 | + |
| ASHG19A3A053214 | 0.007503 | 0.114274 | 3.774065 | down | coding | NM_006912    | RIT1     | chr1  | - |
| ASHG19A3A053245 | 0.009623 | 0.125668 | 2.451923 | down | coding | NM_002569    | FURIN    | chr15 | + |
| ASHG19A3A053268 | 0.032001 | 0.2164   | 3.517365 | down | coding | NM_001042572 | CHD2     | chr15 | + |
| ASHG19A3A053286 | 0.038996 | 0.23636  | 3.5775   | down | coding | NM_183376    | ARRDC4   | chr15 | + |
| ASHG19A3A053448 | 0.040577 | 0.239846 | 4.085941 | down | coding | NM_013399    | C16orf5  | chr16 | - |
| ASHG19A3A053481 | 0.026968 | 0.201258 | 4.409708 | down | coding | NM_003745    | SOCS1    | chr16 | - |
| ASHG19A3A053510 | 0.005861 | 0.10292  | 2.675121 | down | coding | NM_173474    | NTAN1    | chr16 | - |
| ASHG19A3A053654 | 0.023469 | 0.189502 | 2.136877 | down | coding | NM_002746    | MAPK3    | chr16 | - |
| ASHG19A3A053731 | 1.93E-05 | 0.016153 | 2.357979 | down | coding | NM_030790    | ITFG1    | chr16 | - |
| ASHG19A3A053814 | 0.004001 | 0.087853 | 5.773508 | down | coding | NM_001797    | CDH11    | chr16 | - |
| ASHG19A3A053825 | 0.04846  | 0.261704 | 7.410132 | down | coding | NM_001128850 | RRAD     | chr16 | - |
| ASHG19A3A053829 | 0.007937 | 0.117056 | 5.374662 | down | coding | NM_033309    | B3GNT9   | chr16 | - |
| ASHG19A3A054011 | 0.048592 | 0.261823 | 4.466316 | down | coding | NM_020947    | KIAA1609 | chr16 | - |
| ASHG19A3A054112 | 0.021859 | 0.182956 | 4.466015 | down | coding | NM_020664    | DECR2    | chr16 | + |
| ASHG19A3A054117 | 0.048546 | 0.261739 | 6.919709 | down | coding | NM_176677    | NHLRC4   | chr16 | + |
| ASHG19A3A054163 | 0.007845 | 0.116921 | 25.25138 | down | coding | NM_024600    | TMEM204  | chr16 | + |
| ASHG19A3A054189 | 0.000531 | 0.038338 | 2.081857 | down | coding | NM_001098398 | COPA     | chr1  | - |
| ASHG19A3A054214 | 0.000155 | 0.026643 | 5.208822 | down | coding | NM_032296    | FLYWCH1  | chr16 | + |
| ASHG19A3A054229 | 0.018798 | 0.170791 | 5.658008 | down | coding | NM_153028    | ZNF75A   | chr16 | + |
| ASHG19A3A054244 | 0.003897 | 0.086787 | 12.87522 | down | coding | NM_138440    | VASN     | chr16 | + |
| ASHG19A3A054272 | 0.02427  | 0.19199  | 2.003344 | down | coding | NM_024109    | C16orf68 | chr16 | + |
| ASHG19A3A054280 | 0.039971 | 0.238412 | 2.188968 | down | coding | NM_014117    | C16orf72 | chr16 | + |
| ASHG19A3A054318 | 0.000526 | 0.038338 | 6.165914 | down | coding | NM_033201    | C16orf45 | chr16 | + |
| ASHG19A3A054346 | 0.003548 | 0.083557 | 17.67795 | down | coding | NM_020314    | C16orf62 | chr16 | + |
| ASHG19A3A054419 | 0.02275  | 0.18676  | 3.85193  | down | coding | NM_000418    | IL4R     | chr16 | + |
| ASHG19A3A054454 | 0.005531 | 0.100596 | 4.379931 | down | coding | NM_145239    | PRRT2    | chr16 | + |
| ASHG19A3A054459 | 0.049987 | 0.264874 | 2.098245 | down | coding | NM_001083613 | TMEM219  | chr16 | + |
| ASHG19A3A054497 | 0.004199 | 0.089158 | 9.029481 | down | coding | NM_001142544 | CTF1     | chr16 | + |

|                     |          |          |          |      |        |                  |           |       |   |
|---------------------|----------|----------|----------|------|--------|------------------|-----------|-------|---|
| ASHG19A3A054504     | 0.00562  | 0.100699 | 2.063069 | down | coding | NM_004604        | STX4      | chr16 | + |
| ASHG19A3A054524     | 0.000509 | 0.03796  | 7.961065 | down | coding | NM_001164719     | TGFB1I1   | chr16 | + |
| ASHG19A3A054553     | 0.002271 | 0.069865 | 2.066056 | down | coding | NM_053282        | SH2D1B    | chr1  | - |
| ASHG19A3A054574     | 0.048962 | 0.262507 | 3.525161 | down | coding | NM_001114        | ADCY7     | chr16 | + |
| ASHG19A3A054580     | 0.042714 | 0.246066 | 6.564141 | down | coding | NM_003617        | RGS5      | chr1  | - |
| ASHG19A3A054615     | 0.019472 | 0.174349 | 3.344288 | down | coding | NM_005953        | MT2A      | chr16 | + |
| ASHG19A3A054625     | 0.002249 | 0.069808 | 11.06681 | down | coding | NM_005947        | MT1B      | chr16 | + |
| ASHG19A3A054813     | 0.01516  | 0.154742 | 2.862274 | down | coding | NM_020927        | VAT1L     | chr16 | + |
| ASHG19A3A054860     | 0.006402 | 0.106091 | 8.169175 | down | coding | NM_014732        | KIAA0513  | chr16 | + |
| ASHG19A3A054874     | 0.007923 | 0.117056 | 145.9361 | down | coding | NM_001451        | FOXF1     | chr16 | + |
| ASHG19A3A054878     | 0.034834 | 0.224963 | 13.45468 | down | coding | NM_005250        | FOXL1     | chr16 | + |
| ASHG19A3A054963     | 0.031857 | 0.21579  | 6.182809 | down | coding | NM_182705        | FAM101B   | chr17 | - |
| ASHG19A3H0000576    | 0.01585  | 0.157775 | 2.948257 | down | coding | NM_002145_Exon2+ | NM_002145 | chr17 | + |
| CUST_18_PI418767722 | 0.006061 | 0.103718 | 3.982855 | down | coding | NM_000754        | COMT      | chr22 | + |

**Supplementary Table 1-3. The list of lncRNAs upregulated in CRC.**

| ProbeName       | P-value and FDR |          | Fold change and Regulation |            |           | seqname         | GeneSymbol    | chrom | strand |
|-----------------|-----------------|----------|----------------------------|------------|-----------|-----------------|---------------|-------|--------|
|                 | p-value         | FDR      | FCAbsolute                 | regulation | type      |                 |               |       |        |
| ASHG19A3A000029 | 0.001638        | 0.066029 | 2.819092                   | up         | noncoding | AY927440        |               | chr22 | +      |
| ASHG19A3A000029 | 0.001638        | 0.066029 | 2.819092                   | up         | noncoding | AY927440        |               | chr22 | +      |
| ASHG19A3A000029 | 0.001638        | 0.066029 | 2.819092                   | up         | noncoding | AY927440        |               | chr22 | +      |
| ASHG19A3A000029 | 0.001638        | 0.066029 | 2.819092                   | up         | noncoding | AY927440        |               | chr22 | +      |
| ASHG19A3A000029 | 0.001638        | 0.066029 | 2.819092                   | up         | noncoding | AY927440        |               | chr22 | +      |
| ASHG19A3A000037 | 0.038338        | 0.229658 | 2.21816                    | up         | noncoding | BC040186        |               | chr10 | -      |
| ASHG19A3A000037 | 0.038338        | 0.229658 | 2.21816                    | up         | noncoding | BC040186        |               | chr10 | -      |
| ASHG19A3A000077 | 0.045394        | 0.244109 | 2.01564                    | up         | noncoding | ENST00000398804 | RP11-184I16.2 | chr1  | -      |
| ASHG19A3A000077 | 0.045394        | 0.244109 | 2.01564                    | up         | noncoding | ENST00000398804 | RP11-184I16.2 | chr1  | -      |
| ASHG19A3A000077 | 0.045394        | 0.244109 | 2.01564                    | up         | noncoding | ENST00000398804 | RP11-184I16.2 | chr1  | -      |
| ASHG19A3A000077 | 0.045394        | 0.244109 | 2.01564                    | up         | noncoding | ENST00000398804 | RP11-184I16.2 | chr1  | -      |
| ASHG19A3A000077 | 0.045394        | 0.244109 | 2.01564                    | up         | noncoding | ENST00000398804 | RP11-184I16.2 | chr1  | -      |

|                 |          |          |          |    |           |                 |               |       |   |
|-----------------|----------|----------|----------|----|-----------|-----------------|---------------|-------|---|
| ASHG19A3A000077 | 0.045394 | 0.244109 | 2.01564  | up | noncoding | ENST00000398804 | RP11-184I16.2 | chr1  | - |
| ASHG19A3A000077 | 0.045394 | 0.244109 | 2.01564  | up | noncoding | ENST00000398804 | RP11-184I16.2 | chr1  | - |
| ASHG19A3A000077 | 0.045394 | 0.244109 | 2.01564  | up | noncoding | ENST00000398804 | RP11-184I16.2 | chr1  | - |
| ASHG19A3A000077 | 0.045394 | 0.244109 | 2.01564  | up | noncoding | ENST00000398804 | RP11-184I16.2 | chr1  | - |
| ASHG19A3A000077 | 0.045394 | 0.244109 | 2.01564  | up | noncoding | ENST00000398804 | RP11-184I16.2 | chr1  | - |
| ASHG19A3A000077 | 0.045394 | 0.244109 | 2.01564  | up | noncoding | ENST00000398804 | RP11-184I16.2 | chr1  | - |
| ASHG19A3A000081 | 0.047359 | 0.248703 | 2.109999 | up | noncoding | ENST00000400430 | RP11-350A18.1 | chr13 | - |
| ASHG19A3A000095 | 0.009411 | 0.126884 | 2.634995 | up | noncoding | ENST00000412855 | RP11-396C23.2 | chr1  | + |
| ASHG19A3A000107 | 0.047255 | 0.248703 | 2.117576 | up | noncoding | ENST00000414677 | RP5-828H9.3   | chr20 | - |
| ASHG19A3A000234 | 0.03905  | 0.230532 | 3.594741 | up | noncoding | ENST00000435429 | RP3-470L22.1  | chr6  | - |
| ASHG19A3A000302 | 0.005556 | 0.102884 | 2.148569 | up | noncoding | ENST00000447511 | ANTXRL        | chr10 | + |
| ASHG19A3A000356 | 6.03E-05 | 0.022687 | 3.376662 | up | noncoding | ENST00000454647 | C18orf20      | chr18 | - |
| ASHG19A3A000359 | 0.029749 | 0.205052 | 5.934716 | up | noncoding | ENST00000455088 | AL589743.1    | chr14 | + |
| ASHG19A3A000370 | 0.007257 | 0.113881 | 2.400172 | up | noncoding | ENST00000457758 | RP11-152N13.5 | chr10 | + |
| ASHG19A3A000370 | 0.007257 | 0.113881 | 2.400172 | up | noncoding | ENST00000457758 | RP11-152N13.5 | chr10 | + |
| ASHG19A3A000396 | 0.005738 | 0.104342 | 2.993695 | up | noncoding | ENST00000486492 | ZNF767        | chr7  | - |
| ASHG19A3A000401 | 0.003612 | 0.087271 | 7.959156 | up | noncoding | ENST00000488846 | RP11-305M3.3  | chr7  | + |
| ASHG19A3A000402 | 0.009343 | 0.126454 | 2.027554 | up | noncoding | ENST00000488861 | RP11-460N16.1 | chr3  | + |
| ASHG19A3A000456 | 0.000427 | 0.044424 | 2.061771 | up | noncoding | ENST00000506049 | AC005281.1    | chr7  | - |
| ASHG19A3A000456 | 0.000427 | 0.044424 | 2.061771 | up | noncoding | ENST00000506049 | AC005281.1    | chr7  | - |
| ASHG19A3A000529 | 0.040785 | 0.235508 | 2.06151  | up | noncoding | M25803          |               | chr8  | + |
| ASHG19A3A007120 | 0.03606  | 0.223195 | 3.258807 | up | noncoding | NR_003098       | SNHG1         | chr11 | - |
| ASHG19A3A007120 | 0.03606  | 0.223195 | 3.258807 | up | noncoding | NR_003098       | SNHG1         | chr11 | - |
| ASHG19A3A007120 | 0.03606  | 0.223195 | 3.258807 | up | noncoding | NR_003098       | SNHG1         | chr11 | - |
| ASHG19A3A007152 | 0.006526 | 0.110509 | 2.105114 | up | noncoding | uc002xul.3      | C20orf199     | chr20 | + |
| ASHG19A3A007154 | 0.000273 | 0.03723  | 2.103685 | up | noncoding | NR_003606       | C20orf199     | chr20 | + |
| ASHG19A3A007162 | 0.000373 | 0.042176 | 3.703718 | up | noncoding | NR_003697       | C7orf40       | chr7  | - |
| ASHG19A3A007178 | 0.012235 | 0.141026 | 2.394465 | up | noncoding | NR_015366       | LOC388796     | chr20 | - |
| ASHG19A3A007190 | 0.001105 | 0.057823 | 3.324325 | up | noncoding | NR_015429       | LOC283050     | chr10 | - |
| ASHG19A3A007206 | 0.038622 | 0.23009  | 2.531431 | up | noncoding | NR_023360       | CHRAC1        | chr8  | + |
| ASHG19A3A007339 | 0.003105 | 0.082215 | 2.772343 | up | noncoding | NR_024543       | SNHG7         | chr9  | - |
| ASHG19A3A007409 | 0.001004 | 0.057323 | 12.58456 | up | noncoding | NR_026762       | C10orf75      | chr10 | + |
| ASHG19A3A007411 | 0.012222 | 0.141008 | 2.572408 | up | noncoding | NR_026777       | ZNF37B        | chr10 | - |

|                 |          |          |          |    |           |           |           |       |   |
|-----------------|----------|----------|----------|----|-----------|-----------|-----------|-------|---|
| ASHG19A3A007442 | 0.043107 | 0.238904 | 2.57141  | up | noncoding | NR_026931 | ALKBH2    | chr12 | - |
| ASHG19A3A007442 | 0.043107 | 0.238904 | 2.57141  | up | noncoding | NR_026931 | ALKBH2    | chr12 | - |
| ASHG19A3A007442 | 0.043107 | 0.238904 | 2.57141  | up | noncoding | NR_026931 | ALKBH2    | chr12 | - |
| ASHG19A3A007442 | 0.043107 | 0.238904 | 2.57141  | up | noncoding | NR_026931 | ALKBH2    | chr12 | - |
| ASHG19A3A007442 | 0.043107 | 0.238904 | 2.57141  | up | noncoding | NR_026931 | ALKBH2    | chr12 | - |
| ASHG19A3A007447 | 0.028816 | 0.202357 | 2.056573 | up | noncoding | NR_026945 | LOC257358 | chr5  | + |
| ASHG19A3A007493 | 0.002379 | 0.074687 | 4.183507 | up | noncoding | NR_027244 | LOC151009 | chr2  | - |
| ASHG19A3A007504 | 0.000239 | 0.035463 | 10.04693 | up | noncoding | NR_027349 | MIR17HG   | chr13 | + |
| ASHG19A3A007520 | 0.046056 | 0.245558 | 3.051035 | up | noncoding | NR_027405 | MTHFD2    | chr2  | + |
| ASHG19A3A007605 | 0.02708  | 0.196393 | 6.52376  | up | noncoding | NR_027996 | RDM1      | chr17 | - |
| ASHG19A3A007605 | 0.02708  | 0.196393 | 6.52376  | up | noncoding | NR_027996 | RDM1      | chr17 | - |
| ASHG19A3A007605 | 0.02708  | 0.196393 | 6.52376  | up | noncoding | NR_027996 | RDM1      | chr17 | - |
| ASHG19A3A007605 | 0.02708  | 0.196393 | 6.52376  | up | noncoding | NR_027996 | RDM1      | chr17 | - |
| ASHG19A3A007605 | 0.02708  | 0.196393 | 6.52376  | up | noncoding | NR_027996 | RDM1      | chr17 | - |
| ASHG19A3A007605 | 0.02708  | 0.196393 | 6.52376  | up | noncoding | NR_027996 | RDM1      | chr17 | - |
| ASHG19A3A007605 | 0.02708  | 0.196393 | 6.52376  | up | noncoding | NR_027996 | RDM1      | chr17 | - |
| ASHG19A3A007605 | 0.02708  | 0.196393 | 6.52376  | up | noncoding | NR_027996 | RDM1      | chr17 | - |
| ASHG19A3A007610 | 0.025981 | 0.193525 | 2.139541 | up | noncoding | NR_028027 | CREBZF    | chr11 | - |
| ASHG19A3A007730 | 0.049928 | 0.252541 | 3.599188 | up | noncoding | NR_033196 | ZFAND1    | chr8  | - |
| ASHG19A3A007730 | 0.049928 | 0.252541 | 3.599188 | up | noncoding | NR_033196 | ZFAND1    | chr8  | - |
| ASHG19A3A007730 | 0.049928 | 0.252541 | 3.599188 | up | noncoding | NR_033196 | ZFAND1    | chr8  | - |
| ASHG19A3A007731 | 0.00043  | 0.044424 | 5.836474 | up | noncoding | NR_033193 | ZFAND1    | chr8  | - |
| ASHG19A3A007731 | 0.00043  | 0.044424 | 5.836474 | up | noncoding | NR_033193 | ZFAND1    | chr8  | - |
| ASHG19A3A007731 | 0.00043  | 0.044424 | 5.836474 | up | noncoding | NR_033193 | ZFAND1    | chr8  | - |
| ASHG19A3A007755 | 0.000179 | 0.034555 | 2.226191 | up | noncoding | NR_033308 | RAB17     | chr2  | - |
| ASHG19A3A007857 | 0.001941 | 0.070266 | 5.935454 | up | noncoding | U58658    |           | chr17 | - |
| ASHG19A3A007857 | 0.001941 | 0.070266 | 5.935454 | up | noncoding | U58658    |           | chr17 | - |
| ASHG19A3A007857 | 0.001941 | 0.070266 | 5.935454 | up | noncoding | U58658    |           | chr17 | - |
| ASHG19A3A007857 | 0.001941 | 0.070266 | 5.935454 | up | noncoding | U58658    |           | chr17 | - |
| ASHG19A3A007857 | 0.001941 | 0.070266 | 5.935454 | up | noncoding | U58658    |           | chr17 | - |
| ASHG19A3A007860 | 0.000349 | 0.041649 | 2.432845 | up | noncoding | AK124743  |           | chr17 | - |
| ASHG19A3A007881 | 0.0001   | 0.030979 | 2.78921  | up | noncoding | G42912    |           | chr17 | - |
| ASHG19A3A007881 | 0.0001   | 0.030979 | 2.78921  | up | noncoding | G42912    |           | chr17 | - |



|                 |          |          |          |    |           |                 |               |       |   |
|-----------------|----------|----------|----------|----|-----------|-----------------|---------------|-------|---|
| ASHG19A3A008573 | 0.000509 | 0.045915 | 2.211158 | up | noncoding | ENST00000513378 | RP11-94C24.11 | chr17 | - |
| ASHG19A3A008643 | 0.0008   | 0.053868 | 2.413623 | up | noncoding | CR616097        |               | chr17 | - |
| ASHG19A3A008672 | 0.012209 | 0.141008 | 2.362539 | up | noncoding | HIT000332083    |               | chr17 | - |
| ASHG19A3A008687 | 0.001223 | 0.061238 | 2.407547 | up | noncoding | ENST00000437254 | AC046185.2    | chr17 | - |
| ASHG19A3A008701 | 0.012883 | 0.143422 | 2.823096 | up | noncoding | CR597908        |               | chr17 | - |
| ASHG19A3A008701 | 0.012883 | 0.143422 | 2.823096 | up | noncoding | CR597908        |               | chr17 | - |
| ASHG19A3A008701 | 0.012883 | 0.143422 | 2.823096 | up | noncoding | CR597908        |               | chr17 | - |
| ASHG19A3A008701 | 0.012883 | 0.143422 | 2.823096 | up | noncoding | CR597908        |               | chr17 | - |
| ASHG19A3A008840 | 0.00014  | 0.031585 | 2.121152 | up | noncoding | G43544          |               | chr17 | - |
| ASHG19A3A008987 | 0.009027 | 0.125074 | 3.277005 | up | noncoding | ENST00000497885 | RP11-314A20.2 | chr17 | + |
| ASHG19A3A009065 | 0.023854 | 0.185695 | 3.176047 | up | noncoding | NR_027462       | SHBG          | chr17 | + |
| ASHG19A3A009065 | 0.023854 | 0.185695 | 3.176047 | up | noncoding | NR_027462       | SHBG          | chr17 | + |
| ASHG19A3A009065 | 0.023854 | 0.185695 | 3.176047 | up | noncoding | NR_027462       | SHBG          | chr17 | + |
| ASHG19A3A009065 | 0.023854 | 0.185695 | 3.176047 | up | noncoding | NR_027462       | SHBG          | chr17 | + |
| ASHG19A3A009065 | 0.023854 | 0.185695 | 3.176047 | up | noncoding | NR_027462       | SHBG          | chr17 | + |
| ASHG19A3A009088 | 0.008913 | 0.124411 | 2.742307 | up | noncoding | AK123655        |               | chr1  | - |
| ASHG19A3A009088 | 0.008913 | 0.124411 | 2.742307 | up | noncoding | AK123655        |               | chr1  | - |
| ASHG19A3A009111 | 0.002607 | 0.076804 | 3.295313 | up | noncoding | AK098731        |               | chr17 | + |
| ASHG19A3A009198 | 0.032796 | 0.212892 | 2.130757 | up | noncoding | ENST00000418183 | AC127537.6    | chr17 | + |
| ASHG19A3A009234 | 0.030009 | 0.205799 | 4.458605 | up | noncoding | ENST00000427400 | AC025627.2    | chr17 | + |
| ASHG19A3A009263 | 0.01874  | 0.168032 | 4.110047 | up | noncoding | ENST00000455244 | SCDP1         | chr17 | + |
| ASHG19A3A009440 | 0.009263 | 0.126124 | 2.658236 | up | noncoding | AF090924        |               | chr17 | + |
| ASHG19A3A009440 | 0.009263 | 0.126124 | 2.658236 | up | noncoding | AF090924        |               | chr17 | + |
| ASHG19A3A009440 | 0.009263 | 0.126124 | 2.658236 | up | noncoding | AF090924        |               | chr17 | + |
| ASHG19A3A009440 | 0.009263 | 0.126124 | 2.658236 | up | noncoding | AF090924        |               | chr17 | + |
| ASHG19A3A009440 | 0.009263 | 0.126124 | 2.658236 | up | noncoding | AF090924        |               | chr17 | + |
| ASHG19A3A009440 | 0.009263 | 0.126124 | 2.658236 | up | noncoding | AF090924        |               | chr17 | + |
| ASHG19A3A009440 | 0.009263 | 0.126124 | 2.658236 | up | noncoding | AF090924        |               | chr17 | + |
| ASHG19A3A009539 | 0.009961 | 0.129916 | 2.131233 | up | noncoding | ENST00000479088 | CTD-3193K9.1  | chr17 | + |
| ASHG19A3A009609 | 0.048209 | 0.250288 | 2.738912 | up | noncoding | NR_027295       | MGC57346      | chr17 | + |
| ASHG19A3A009611 | 0.00772  | 0.116643 | 4.509326 | up | noncoding | NR_026905       | C17orf69      | chr17 | + |
| ASHG19A3A009612 | 0.046879 | 0.248431 | 2.921857 | up | noncoding | NR_026906       | C17orf69      | chr17 | + |
| ASHG19A3A009622 | 0.008775 | 0.123403 | 2.459951 | up | noncoding | BC018467        |               | chr17 | + |



|                 |          |          |          |    |           |                 |               |       |   |
|-----------------|----------|----------|----------|----|-----------|-----------------|---------------|-------|---|
| ASHG19A3A009725 | 0.015944 | 0.155608 | 2.361512 | up | noncoding | uc002ist.1      | AK090674      | chr17 | + |
| ASHG19A3A009824 | 0.004409 | 0.094569 | 3.90324  | up | noncoding | ENST00000443294 | RP11-480I12.5 | chr1  | - |
| ASHG19A3A009826 | 0.000505 | 0.045915 | 2.174077 | up | noncoding | ENST00000463377 | TCAM1         | chr17 | + |
| ASHG19A3A009922 | 0.041222 | 0.236689 | 2.058991 | up | noncoding | ENST00000455685 | AC111186.1    | chr17 | + |
| ASHG19A3A009980 | 0.032291 | 0.21224  | 4.036443 | up | noncoding | NR_003013       | SCARNA16      | chr17 | + |
| ASHG19A3A009980 | 0.032291 | 0.21224  | 4.036443 | up | noncoding | NR_003013       | SCARNA16      | chr17 | + |
| ASHG19A3A009981 | 0.010481 | 0.132357 | 2.874523 | up | noncoding | ENST00000366365 | C17orf86      | chr17 | + |
| ASHG19A3A009981 | 0.010481 | 0.132357 | 2.874523 | up | noncoding | ENST00000366365 | C17orf86      | chr17 | + |
| ASHG19A3A009982 | 0.007946 | 0.118775 | 2.888431 | up | noncoding | NR_027058       | C17orf86      | chr17 | + |
| ASHG19A3A009982 | 0.007946 | 0.118775 | 2.888431 | up | noncoding | NR_027058       | C17orf86      | chr17 | + |
| ASHG19A3A010010 | 0.002292 | 0.074504 | 2.482591 | up | noncoding | NR_027083       | AFMID         | chr17 | + |
| ASHG19A3A010010 | 0.002292 | 0.074504 | 2.482591 | up | noncoding | NR_027083       | AFMID         | chr17 | + |
| ASHG19A3A010010 | 0.002292 | 0.074504 | 2.482591 | up | noncoding | NR_027083       | AFMID         | chr17 | + |
| ASHG19A3A010069 | 0.049541 | 0.252234 | 2.309988 | up | noncoding | NR_015454       | LOC92659      | chr17 | + |
| ASHG19A3A010086 | 0.027955 | 0.199722 | 2.993757 | up | noncoding | NR_027022       | LOC127841     | chr1  | - |
| ASHG19A3A010114 | 0.043123 | 0.238904 | 2.426348 | up | noncoding | HIT000089567    |               | chr18 | - |
| ASHG19A3A010116 | 0.003089 | 0.082215 | 2.716603 | up | noncoding | NR_026659       | LOC727896     | chr18 | - |
| ASHG19A3A010307 | 0.011121 | 0.135071 | 2.907499 | up | noncoding | BX640937        |               | chr18 | - |
| ASHG19A3A010307 | 0.011121 | 0.135071 | 2.907499 | up | noncoding | BX640937        |               | chr18 | - |
| ASHG19A3A010336 | 6.57E-05 | 0.022687 | 2.124053 | up | noncoding | BC043263        |               | chr18 | - |
| ASHG19A3A010349 | 0.036863 | 0.225519 | 6.955436 | up | noncoding | ENST00000398170 | AC090377.3    | chr18 | - |
| ASHG19A3A010580 | 0.020509 | 0.174085 | 2.82828  | up | noncoding | ENST00000485809 | RP11-57G22.1  | chr18 | + |
| ASHG19A3A010640 | 0.007121 | 0.113542 | 3.51331  | up | noncoding | AB027121        |               | chr18 | + |
| ASHG19A3A010696 | 0.012183 | 0.141008 | 4.330333 | up | noncoding | ENST00000398175 | AC090377.1    | chr18 | + |
| ASHG19A3A010765 | 0.003248 | 0.083681 | 3.794407 | up | noncoding | AK055411        |               | chr18 | + |
| ASHG19A3A010847 | 0.000168 | 0.03366  | 3.033506 | up | noncoding | uc002lvd.1      | AX746733      | chr19 | - |
| ASHG19A3A010890 | 0.003845 | 0.089011 | 2.630356 | up | noncoding | AK098628        |               | chr19 | - |
| ASHG19A3A010903 | 0.036097 | 0.223195 | 3.224466 | up | noncoding | AK125589        |               | chr19 | - |
| ASHG19A3A010928 | 0.025116 | 0.191092 | 2.583952 | up | noncoding | ENST00000356684 | RP11-348H3.6  | chr1  | - |
| ASHG19A3A010932 | 0.014273 | 0.147962 | 4.23378  | up | noncoding | NR_027285       | LQK1          | chr1  | - |
| ASHG19A3A010947 | 0.00233  | 0.074687 | 3.031851 | up | noncoding | ENST00000484151 | RP11-554K11.1 | chr1  | - |
| ASHG19A3A010970 | 0.000409 | 0.044424 | 9.01022  | up | noncoding | uc002mip.2      | DKFZp761K0816 | chr19 | - |
| ASHG19A3A011177 | 0.004512 | 0.095403 | 2.635112 | up | noncoding | ENST00000435424 | AC005336.2    | chr19 | - |

|                 |          |          |          |    |           |                 |               |       |   |
|-----------------|----------|----------|----------|----|-----------|-----------------|---------------|-------|---|
| ASHG19A3A011180 | 0.022753 | 0.182545 | 2.214968 | up | noncoding | AK056565        |               | chr19 | - |
| ASHG19A3A011180 | 0.022753 | 0.182545 | 2.214968 | up | noncoding | AK056565        |               | chr19 | - |
| ASHG19A3A011225 | 0.000205 | 0.034555 | 2.467201 | up | noncoding | BX648739        |               | chr19 | - |
| ASHG19A3A011225 | 0.000205 | 0.034555 | 2.467201 | up | noncoding | BX648739        |               | chr19 | - |
| ASHG19A3A011225 | 0.000205 | 0.034555 | 2.467201 | up | noncoding | BX648739        |               | chr19 | - |
| ASHG19A3A011225 | 0.000205 | 0.034555 | 2.467201 | up | noncoding | BX648739        |               | chr19 | - |
| ASHG19A3A011225 | 0.000205 | 0.034555 | 2.467201 | up | noncoding | BX648739        |               | chr19 | - |
| ASHG19A3A011225 | 0.000205 | 0.034555 | 2.467201 | up | noncoding | BX648739        |               | chr19 | - |
| ASHG19A3A011225 | 0.000205 | 0.034555 | 2.467201 | up | noncoding | BX648739        |               | chr19 | - |
| ASHG19A3A011225 | 0.000205 | 0.034555 | 2.467201 | up | noncoding | BX648739        |               | chr19 | - |
| ASHG19A3A011225 | 0.000205 | 0.034555 | 2.467201 | up | noncoding | BX648739        |               | chr19 | - |
| ASHG19A3A011225 | 0.000205 | 0.034555 | 2.467201 | up | noncoding | BX648739        |               | chr19 | - |
| ASHG19A3A011225 | 0.000205 | 0.034555 | 2.467201 | up | noncoding | BX648739        |               | chr19 | - |
| ASHG19A3A011225 | 0.000205 | 0.034555 | 2.467201 | up | noncoding | BX648739        |               | chr19 | - |
| ASHG19A3A011225 | 0.000205 | 0.034555 | 2.467201 | up | noncoding | BX648739        |               | chr19 | - |
| ASHG19A3A011225 | 0.000205 | 0.034555 | 2.467201 | up | noncoding | BX648739        |               | chr19 | - |
| ASHG19A3A011225 | 0.000205 | 0.034555 | 2.467201 | up | noncoding | BX648739        |               | chr19 | - |
| ASHG19A3A011225 | 0.000205 | 0.034555 | 2.467201 | up | noncoding | BX648739        |               | chr19 | - |
| ASHG19A3A011225 | 0.000205 | 0.034555 | 2.467201 | up | noncoding | BX648739        |               | chr19 | - |
| ASHG19A3A011225 | 0.000205 | 0.034555 | 2.467201 | up | noncoding | BX648739        |               | chr19 | - |
| ASHG19A3A011358 | 0.003393 | 0.084873 | 2.34581  | up | noncoding | uc002oag.2      | CR627053      | chr19 | - |
| ASHG19A3A011358 | 0.003393 | 0.084873 | 2.34581  | up | noncoding | uc002oag.2      | CR627053      | chr19 | - |
| ASHG19A3A011364 | 0.003096 | 0.082215 | 2.001698 | up | noncoding | uc002obl.2      | AL137752      | chr19 | - |
| ASHG19A3A011415 | 0.015398 | 0.153863 | 2.31204  | up | noncoding | BC128427        |               | chr19 | - |
| ASHG19A3A011579 | 0.004426 | 0.094569 | 2.244757 | up | noncoding | ENST00000415453 | RP11-365O16.1 | chr1  | - |
| ASHG19A3A011709 | 0.045098 | 0.243678 | 2.069117 | up | noncoding | ENST00000441809 | CTA-520D8.2   | chr1  | - |
| ASHG19A3A011859 | 0.039147 | 0.230766 | 3.131876 | up | noncoding | uc002qim.1      | AL833150      | chr19 | - |
| ASHG19A3A011860 | 0.032448 | 0.212292 | 4.091875 | up | noncoding | NR_027382       | RDH13         | chr19 | - |
| ASHG19A3A011860 | 0.032448 | 0.212292 | 4.091875 | up | noncoding | NR_027382       | RDH13         | chr19 | - |
| ASHG19A3A011947 | 0.007816 | 0.117859 | 2.739245 | up | noncoding | NR_027136       | C1orf126      | chr1  | - |
| ASHG19A3A011947 | 0.007816 | 0.117859 | 2.739245 | up | noncoding | NR_027136       | C1orf126      | chr1  | - |
| ASHG19A3A011947 | 0.007816 | 0.117859 | 2.739245 | up | noncoding | NR_027136       | C1orf126      | chr1  | - |

|                 |          |          |          |    |           |                 |                 |       |   |
|-----------------|----------|----------|----------|----|-----------|-----------------|-----------------|-------|---|
| ASHG19A3A011989 | 0.00354  | 0.086063 | 2.663822 | up | noncoding | ENST00000398858 | AC011544.1      | chr19 | + |
| ASHG19A3A012089 | 0.002486 | 0.075264 | 3.163628 | up | noncoding | ENST00000505358 | AC004611.1      | chr19 | + |
| ASHG19A3A012184 | 0.003997 | 0.089784 | 3.039843 | up | noncoding | AK127757        |                 | chr19 | + |
| ASHG19A3A012338 | 0.011619 | 0.138062 | 30.72385 | up | noncoding | NR_015379       | UCA1            | chr19 | + |
| ASHG19A3A012339 | 0.028135 | 0.200153 | 3.788659 | up | noncoding | ENST00000397381 | UCA1            | chr19 | + |
| ASHG19A3A012413 | 0.031711 | 0.21046  | 2.004144 | up | noncoding | HIT000329104    |                 | chr19 | + |
| ASHG19A3A012413 | 0.031711 | 0.21046  | 2.004144 | up | noncoding | HIT000329104    |                 | chr19 | + |
| ASHG19A3A012413 | 0.031711 | 0.21046  | 2.004144 | up | noncoding | HIT000329104    |                 | chr19 | + |
| ASHG19A3A012669 | 0.010934 | 0.134717 | 2.63086  | up | noncoding | AK092396        |                 | chr19 | + |
| ASHG19A3A012674 | 0.003919 | 0.089172 | 2.593126 | up | noncoding | ENST00000477483 | AC005205.4      | chr19 | + |
| ASHG19A3A012738 | 0.021997 | 0.179745 | 2.57258  | up | noncoding | ENST00000446199 | RP11-293G6__B.5 | chr1  | - |
| ASHG19A3A012871 | 0.043962 | 0.241054 | 2.524176 | up | noncoding | HIT000071394    |                 | chr19 | + |
| ASHG19A3A012871 | 0.043962 | 0.241054 | 2.524176 | up | noncoding | HIT000071394    |                 | chr19 | + |
| ASHG19A3A012871 | 0.043962 | 0.241054 | 2.524176 | up | noncoding | HIT000071394    |                 | chr19 | + |
| ASHG19A3A013018 | 0.000342 | 0.041094 | 4.335707 | up | noncoding | ENST00000433123 | RP11-193H5.5    | chr1  | - |
| ASHG19A3A013134 | 0.012452 | 0.141895 | 2.084247 | up | noncoding | AK054806        |                 | chr19 | + |
| ASHG19A3A013175 | 0.00133  | 0.06217  | 2.423365 | up | noncoding | AK054778        |                 | chr19 | + |
| ASHG19A3A013242 | 0.002251 | 0.074362 | 2.585602 | up | noncoding | ENST00000431336 | AC097517.2      | chr2  | - |
| ASHG19A3A013318 | 0.032495 | 0.212294 | 2.490254 | up | noncoding | AB074178        |                 | chr2  | - |
| ASHG19A3A013347 | 0.036596 | 0.2248   | 3.400451 | up | noncoding | ENST00000449391 | AC012065.6      | chr2  | - |
| ASHG19A3A013358 | 0.004959 | 0.098474 | 2.014375 | up | noncoding | ENST00000412424 | AC009411.1      | chr2  | - |
| ASHG19A3A013360 | 0.003402 | 0.084873 | 2.323122 | up | noncoding | ENST00000450551 | AC068490.2      | chr2  | - |
| ASHG19A3A013419 | 0.003827 | 0.089011 | 2.34653  | up | noncoding | ENST00000436954 | AC013403.13     | chr2  | - |
| ASHG19A3A013424 | 0.017329 | 0.162668 | 2.06554  | up | noncoding | ENST00000515139 | AC013413.1      | chr2  | - |
| ASHG19A3A013424 | 0.017329 | 0.162668 | 2.06554  | up | noncoding | ENST00000515139 | AC013413.1      | chr2  | - |
| ASHG19A3A013484 | 0.02019  | 0.174085 | 2.132708 | up | noncoding | ENST00000413713 | AC069303.1      | chr2  | - |
| ASHG19A3A013527 | 0.003789 | 0.088847 | 2.542364 | up | noncoding | G43628          |                 | chr2  | - |
| ASHG19A3A013555 | 0.039629 | 0.232584 | 2.173512 | up | noncoding | ENST00000457457 | AC016735.1      | chr2  | - |
| ASHG19A3A013581 | 4.49E-05 | 0.021079 | 7.111443 | up | noncoding | ENST00000416146 | AC017078.1      | chr2  | - |
| ASHG19A3A013629 | 0.033644 | 0.214932 | 2.248679 | up | noncoding | AK057710        |                 | chr2  | - |
| ASHG19A3A013748 | 0.001523 | 0.064446 | 3.950133 | up | noncoding | ENST00000455212 | AC007386.3      | chr2  | - |
| ASHG19A3A013752 | 0.000151 | 0.031891 | 2.701094 | up | noncoding | ENST00000427827 | RP11-438F14.1   | chr1  | - |
| ASHG19A3A013817 | 0.001886 | 0.069271 | 2.084422 | up | noncoding | AK124090        |                 | chr2  | - |

|                 |          |          |          |    |           |                 |               |      |   |
|-----------------|----------|----------|----------|----|-----------|-----------------|---------------|------|---|
| ASHG19A3A013848 | 0.026904 | 0.196339 | 6.473463 | up | noncoding | ENST00000453103 | AC073046.4    | chr2 | - |
| ASHG19A3A013848 | 0.026904 | 0.196339 | 6.473463 | up | noncoding | ENST00000453103 | AC073046.4    | chr2 | - |
| ASHG19A3A013902 | 0.033084 | 0.213622 | 2.998025 | up | noncoding | NR_002714       | REG1P         | chr2 | - |
| ASHG19A3A013975 | 0.036076 | 0.223195 | 3.231452 | up | noncoding | NR_026846       | LOC285074     | chr2 | - |
| ASHG19A3A014009 | 0.00167  | 0.066297 | 17.76822 | up | noncoding | ENST00000426492 | AC073464.8    | chr2 | - |
| ASHG19A3A014060 | 0.036011 | 0.223195 | 2.236909 | up | noncoding | AK098629        |               | chr2 | - |
| ASHG19A3A014060 | 0.036011 | 0.223195 | 2.236909 | up | noncoding | AK098629        |               | chr2 | - |
| ASHG19A3A014141 | 5.13E-05 | 0.021384 | 2.797283 | up | noncoding | AK058000        |               | chr2 | - |
| ASHG19A3A014190 | 0.002569 | 0.076396 | 2.828764 | up | noncoding | uc002tft.1      | LOC440895     | chr2 | - |
| ASHG19A3A014194 | 0.001469 | 0.063576 | 3.763276 | up | noncoding | ENST00000416774 | RP11-465B22.5 | chr1 | + |
| ASHG19A3A014259 | 0.011972 | 0.140142 | 2.414057 | up | noncoding | ENST00000454260 | AC016736.2    | chr2 | - |
| ASHG19A3A014259 | 0.011972 | 0.140142 | 2.414057 | up | noncoding | ENST00000454260 | AC016736.2    | chr2 | - |
| ASHG19A3A014259 | 0.011972 | 0.140142 | 2.414057 | up | noncoding | ENST00000454260 | AC016736.2    | chr2 | - |
| ASHG19A3A014263 | 0.004006 | 0.089803 | 2.758697 | up | noncoding | ENST00000441321 | AC016691.2    | chr2 | - |
| ASHG19A3A014348 | 0.049917 | 0.252541 | 2.582889 | up | noncoding | ENST00000417310 | CYP4F11       | chr2 | - |
| ASHG19A3A014394 | 0.017914 | 0.165769 | 2.052227 | up | noncoding | ENST00000440802 | AC097532.2    | chr2 | - |
| ASHG19A3A014413 | 3.05E-05 | 0.017174 | 7.576586 | up | noncoding | ENST00000397436 | AC011999.1    | chr2 | - |
| ASHG19A3A014586 | 0.002958 | 0.081974 | 2.042965 | up | noncoding | ENST00000444526 | AC092601.1    | chr2 | - |
| ASHG19A3A014586 | 0.002958 | 0.081974 | 2.042965 | up | noncoding | ENST00000444526 | AC092601.1    | chr2 | - |
| ASHG19A3A014586 | 0.002958 | 0.081974 | 2.042965 | up | noncoding | ENST00000444526 | AC092601.1    | chr2 | - |
| ASHG19A3A014587 | 0.002354 | 0.074687 | 8.962453 | up | noncoding | ENST00000397819 | AC017070.1    | chr2 | - |
| ASHG19A3A014591 | 0.030956 | 0.208582 | 2.031548 | up | noncoding | AF251187        |               | chr2 | - |
| ASHG19A3A014591 | 0.030956 | 0.208582 | 2.031548 | up | noncoding | AF251187        |               | chr2 | - |
| ASHG19A3A014591 | 0.030956 | 0.208582 | 2.031548 | up | noncoding | AF251187        |               | chr2 | - |
| ASHG19A3A014591 | 0.030956 | 0.208582 | 2.031548 | up | noncoding | AF251187        |               | chr2 | - |
| ASHG19A3A014628 | 0.022302 | 0.181636 | 3.027206 | up | noncoding | ENST00000455435 | AC018712.3    | chr2 | - |
| ASHG19A3A014639 | 0.011684 | 0.138492 | 2.505258 | up | noncoding | ENST00000444235 | RPL5P7        | chr2 | - |
| ASHG19A3A014663 | 0.003714 | 0.088263 | 2.849218 | up | noncoding | ENST00000458254 | AC016751.2    | chr2 | - |
| ASHG19A3A014666 | 0.003467 | 0.085214 | 2.531293 | up | noncoding | ENST00000440016 | AC009336.21   | chr2 | - |
| ASHG19A3A014666 | 0.003467 | 0.085214 | 2.531293 | up | noncoding | ENST00000440016 | AC009336.21   | chr2 | - |
| ASHG19A3A014666 | 0.003467 | 0.085214 | 2.531293 | up | noncoding | ENST00000440016 | AC009336.21   | chr2 | - |
| ASHG19A3A014666 | 0.003467 | 0.085214 | 2.531293 | up | noncoding | ENST00000440016 | AC009336.21   | chr2 | - |
| ASHG19A3A014732 | 0.047512 | 0.249156 | 19.1201  | up | noncoding | ENST00000450021 | KRT8P10       | chr2 | - |

|                 |          |          |          |    |           |                 |             |      |   |
|-----------------|----------|----------|----------|----|-----------|-----------------|-------------|------|---|
| ASHG19A3A014737 | 0.003075 | 0.082215 | 3.334504 | up | noncoding | ENST00000442301 | AC010747.2  | chr2 | - |
| ASHG19A3A014761 | 0.04915  | 0.25214  | 3.460653 | up | noncoding | ENST00000395181 | KRT18P19    | chr2 | - |
| ASHG19A3A014836 | 0.043407 | 0.239621 | 2.109    | up | noncoding | uc002uvq.2      | BC039445    | chr2 | - |
| ASHG19A3A014843 | 0.008244 | 0.120799 | 2.475975 | up | noncoding | AK025184        |             | chr2 | - |
| ASHG19A3A014884 | 0.0185   | 0.166966 | 3.270573 | up | noncoding | AF086549        |             | chr2 | - |
| ASHG19A3A014888 | 0.003395 | 0.084873 | 2.325344 | up | noncoding | ENST00000413895 | AC023271.2  | chr2 | - |
| ASHG19A3A014969 | 0.000599 | 0.049132 | 4.365276 | up | noncoding | ENST00000413311 | AC093382.1  | chr2 | - |
| ASHG19A3A014982 | 0.001149 | 0.058346 | 4.626397 | up | noncoding | ENST00000433233 | AC007563.4  | chr2 | - |
| ASHG19A3A015038 | 0.007249 | 0.113881 | 2.616478 | up | noncoding | ENST00000438659 | AC008281.1  | chr2 | - |
| ASHG19A3A015081 | 0.007634 | 0.115704 | 7.531637 | up | noncoding | ENST00000331589 | AC073065.4  | chr2 | - |
| ASHG19A3A015084 | 0.001904 | 0.069758 | 3.140903 | up | noncoding | ENST00000432481 | AC009410.1  | chr2 | - |
| ASHG19A3A015192 | 0.008222 | 0.120678 | 2.341617 | up | noncoding | AK024254        |             | chr2 | - |
| ASHG19A3A015192 | 0.008222 | 0.120678 | 2.341617 | up | noncoding | AK024254        |             | chr2 | - |
| ASHG19A3A015201 | 0.002386 | 0.074687 | 3.055273 | up | noncoding | uc002waf.2      | BC040629    | chr2 | - |
| ASHG19A3A015227 | 0.002289 | 0.074504 | 3.557071 | up | noncoding | ENST00000431968 | RP3-477M7.6 | chr1 | + |
| ASHG19A3A015296 | 0.025342 | 0.191965 | 2.710368 | up | noncoding | CR598370        |             | chr2 | + |
| ASHG19A3A015304 | 0.04382  | 0.240635 | 2.286239 | up | noncoding | BC009884        |             | chr2 | + |
| ASHG19A3A015520 | 0.001422 | 0.062929 | 2.995123 | up | noncoding | AK057148        |             | chr2 | + |
| ASHG19A3A015536 | 0.031254 | 0.208947 | 2.904154 | up | noncoding | ENST00000446719 | AC009229.4  | chr2 | + |
| ASHG19A3A015843 | 0.006509 | 0.110473 | 3.252142 | up | noncoding | CR613601        |             | chr2 | + |
| ASHG19A3A015955 | 0.031335 | 0.208981 | 2.091515 | up | noncoding | HIT000324182_03 |             | chr2 | + |
| ASHG19A3A015974 | 0.000606 | 0.049456 | 2.361323 | up | noncoding | ENST00000416118 | AC128677.2  | chr2 | + |
| ASHG19A3A016031 | 0.002549 | 0.076252 | 2.567359 | up | noncoding | AF119842        |             | chr2 | + |
| ASHG19A3A016059 | 0.005471 | 0.102582 | 2.780165 | up | noncoding | AK098124        |             | chr2 | + |
| ASHG19A3A016151 | 0.005937 | 0.105277 | 2.666982 | up | noncoding | AK023150        |             | chr2 | + |
| ASHG19A3A016165 | 0.000258 | 0.03723  | 11.1365  | up | noncoding | uc002tfi.3      | AK056084    | chr2 | + |
| ASHG19A3A016201 | 0.005305 | 0.101436 | 2.77019  | up | noncoding | ENST00000449927 | AC115115.4  | chr2 | + |
| ASHG19A3A016341 | 0.005048 | 0.099241 | 2.051456 | up | noncoding | ENST00000444325 | AC068137.4  | chr2 | + |
| ASHG19A3A016518 | 0.002203 | 0.073357 | 32.22546 | up | noncoding | uc002ubt.1      | AK027541    | chr2 | + |
| ASHG19A3A016519 | 0.006626 | 0.111318 | 15.87258 | up | noncoding | ENST00000439050 | AC009299.3  | chr2 | + |
| ASHG19A3A016567 | 0.006286 | 0.108642 | 8.264762 | up | noncoding | uc002ufj.3      | KLHL23      | chr2 | + |
| ASHG19A3A016567 | 0.006286 | 0.108642 | 8.264762 | up | noncoding | uc002ufj.3      | KLHL23      | chr2 | + |
| ASHG19A3A016579 | 0.002023 | 0.070664 | 15.0874  | up | noncoding | ENST00000426475 | AC007405.6  | chr2 | + |

|                 |          |          |          |    |           |                 |              |       |   |
|-----------------|----------|----------|----------|----|-----------|-----------------|--------------|-------|---|
| ASHG19A3A016645 | 0.045637 | 0.244445 | 15.42576 | up | noncoding | ENST00000392131 | AC079305.6   | chr2  | + |
| ASHG19A3A016653 | 0.024046 | 0.186353 | 2.53312  | up | noncoding | ENST00000357045 | AC073834.3   | chr2  | + |
| ASHG19A3A016697 | 0.001067 | 0.057323 | 2.988094 | up | noncoding | ENST00000441026 | AC093639.1   | chr2  | + |
| ASHG19A3A016901 | 0.004885 | 0.098198 | 2.063894 | up | noncoding | ENST00000418459 | AC013409.2   | chr2  | + |
| ASHG19A3A016908 | 0.002414 | 0.074687 | 2.379271 | up | noncoding | AK055724        |              | chr2  | + |
| ASHG19A3A016918 | 0.01097  | 0.135046 | 2.570942 | up | noncoding | ENST00000422990 | AC105921.2   | chr2  | + |
| ASHG19A3A016918 | 0.01097  | 0.135046 | 2.570942 | up | noncoding | ENST00000422990 | AC105921.2   | chr2  | + |
| ASHG19A3A017114 | 0.026591 | 0.195292 | 2.949708 | up | noncoding | NR_003008       | SCARNA5      | chr2  | + |
| ASHG19A3A017114 | 0.026591 | 0.195292 | 2.949708 | up | noncoding | NR_003008       | SCARNA5      | chr2  | + |
| ASHG19A3A017114 | 0.026591 | 0.195292 | 2.949708 | up | noncoding | NR_003008       | SCARNA5      | chr2  | + |
| ASHG19A3A017114 | 0.026591 | 0.195292 | 2.949708 | up | noncoding | NR_003008       | SCARNA5      | chr2  | + |
| ASHG19A3A017270 | 0.042891 | 0.238803 | 3.025478 | up | noncoding | AK021907        |              | chr20 | - |
| ASHG19A3A017297 | 0.049831 | 0.252541 | 2.135734 | up | noncoding | uc002wka.1      | BC012193     | chr20 | - |
| ASHG19A3A017297 | 0.049831 | 0.252541 | 2.135734 | up | noncoding | uc002wka.1      | BC012193     | chr20 | - |
| ASHG19A3A017297 | 0.049831 | 0.252541 | 2.135734 | up | noncoding | uc002wka.1      | BC012193     | chr20 | - |
| ASHG19A3A017331 | 0.010246 | 0.130859 | 7.059179 | up | noncoding | BC019703        |              | chr20 | - |
| ASHG19A3A017334 | 0.005586 | 0.10303  | 4.928639 | up | noncoding | ENST00000445589 | RP5-859D4.3  | chr20 | - |
| ASHG19A3A017342 | 0.011895 | 0.139623 | 2.13673  | up | noncoding | ENST00000439121 | RP5-859I17.2 | chr20 | - |
| ASHG19A3A017413 | 0.023226 | 0.184275 | 11.93193 | up | noncoding | ENST00000431038 | RP11-379J5.4 | chr20 | - |
| ASHG19A3A017537 | 0.005562 | 0.102884 | 2.479844 | up | noncoding | ENST00000412178 | RP3-324O17.2 | chr20 | - |
| ASHG19A3A017537 | 0.005562 | 0.102884 | 2.479844 | up | noncoding | ENST00000412178 | RP3-324O17.2 | chr20 | - |
| ASHG19A3A017537 | 0.005562 | 0.102884 | 2.479844 | up | noncoding | ENST00000412178 | RP3-324O17.2 | chr20 | - |
| ASHG19A3A017655 | 0.001683 | 0.06636  | 2.787116 | up | noncoding | uc002xig.3      | LOC388796    | chr20 | - |
| ASHG19A3A017656 | 0.00088  | 0.054542 | 2.837725 | up | noncoding | BX640887        |              | chr20 | - |
| ASHG19A3A017659 | 0.022484 | 0.18214  | 2.228618 | up | noncoding | BC071821        |              | chr20 | - |
| ASHG19A3A017659 | 0.022484 | 0.18214  | 2.228618 | up | noncoding | BC071821        |              | chr20 | - |
| ASHG19A3A017759 | 0.002704 | 0.078866 | 3.64568  | up | noncoding | ENST00000425552 | RPL35AP      | chr20 | - |
| ASHG19A3A017885 | 0.026379 | 0.195017 | 2.122138 | up | noncoding | BC037164        |              | chr20 | - |
| ASHG19A3A017888 | 0.007224 | 0.113881 | 2.732989 | up | noncoding | AK056716        |              | chr20 | - |
| ASHG19A3A017892 | 0.00098  | 0.057247 | 43.3089  | up | noncoding | ENST00000412500 | RP5-885L7.10 | chr20 | - |
| ASHG19A3A017893 | 0.003383 | 0.084873 | 16.31962 | up | noncoding | uc002ydh.2      | BC141903     | chr20 | - |
| ASHG19A3A017948 | 0.001348 | 0.062273 | 2.135034 | up | noncoding | BC043438        |              | chr20 | + |

|                 |          |          |          |    |           |                 |               |       |   |
|-----------------|----------|----------|----------|----|-----------|-----------------|---------------|-------|---|
| ASHG19A3A018062 | 0.039785 | 0.233117 | 2.059787 | up | noncoding | AK098701        |               | chr1  | + |
| ASHG19A3A018244 | 0.028058 | 0.199722 | 3.134202 | up | noncoding | ENST00000450770 | RP11-346K17.3 | chr20 | + |
| ASHG19A3A018251 | 0.001739 | 0.067157 | 5.423801 | up | noncoding | NR_026685       | PDIK1L        | chr1  | + |
| ASHG19A3A018297 | 0.043085 | 0.238904 | 2.46855  | up | noncoding | ENST00000453698 | SNHG11        | chr20 | + |
| ASHG19A3A018434 | 0.034773 | 0.219251 | 2.323677 | up | noncoding | ENST00000411453 | RP11-112L6.4  | chr20 | + |
| ASHG19A3A018451 | 0.03147  | 0.209592 | 2.821656 | up | noncoding | AF095854        |               | chr20 | + |
| ASHG19A3A018455 | 0.000652 | 0.050176 | 4.727534 | up | noncoding | ENST00000421642 | RP4-715N11.2  | chr20 | + |
| ASHG19A3A018539 | 0.03265  | 0.212612 | 4.83693  | up | noncoding | ENST00000433121 | RP5-908M14.5  | chr20 | + |
| ASHG19A3A018675 | 0.001109 | 0.057833 | 7.718163 | up | noncoding | ENST00000413190 | RPS3AP1       | chr21 | - |
| ASHG19A3A018839 | 6.77E-05 | 0.022687 | 3.515975 | up | noncoding | ENST00000431167 | AF015726.1    | chr21 | - |
| ASHG19A3A018902 | 0.00108  | 0.057502 | 3.53699  | up | noncoding | NR_024100       | C21orf130     | chr21 | - |
| ASHG19A3A018968 | 0.045831 | 0.245047 | 2.549155 | up | noncoding | ENST00000423310 | AP001065.2    | chr21 | - |
| ASHG19A3A019087 | 0.037706 | 0.227525 | 2.791194 | up | noncoding | ENST00000448908 | RPL37P4       | chr21 | + |
| ASHG19A3A019278 | 0.013539 | 0.145745 | 8.407177 | up | noncoding | AK023647        |               | chr21 | + |
| ASHG19A3A019318 | 0.024854 | 0.189676 | 2.324232 | up | noncoding | CR624629        |               | chr21 | + |
| ASHG19A3A019396 | 0.026085 | 0.193675 | 2.357094 | up | noncoding | ENST00000447478 | RP4-534N18.2  | chr1  | + |
| ASHG19A3A019407 | 0.000155 | 0.032382 | 45.98661 | up | noncoding | ENST00000447898 | AP000525.8    | chr22 | - |
| ASHG19A3A019411 | 0.012366 | 0.141883 | 4.236474 | up | noncoding | ENST00000412729 | LA16c-60G3.6  | chr22 | - |
| ASHG19A3A019561 | 0.013612 | 0.145815 | 4.446118 | up | noncoding | ENST00000415114 | AP000344.1    | chr22 | - |
| ASHG19A3A019568 | 0.041418 | 0.236702 | 2.947516 | up | noncoding | uc002zxc.3      | LOC91316      | chr22 | - |
| ASHG19A3A019599 | 0.000181 | 0.034555 | 3.551738 | up | noncoding | uc003aaz.3      | DKFZp434K191  | chr22 | - |
| ASHG19A3A019649 | 0.01045  | 0.132114 | 2.247168 | up | noncoding | ENST00000447099 | CTA-292E10.7  | chr22 | - |
| ASHG19A3A019862 | 0.000193 | 0.034555 | 2.13438  | up | noncoding | ENST00000333487 | RP5-821D11.7  | chr22 | - |
| ASHG19A3A019868 | 0.021702 | 0.178416 | 2.318195 | up | noncoding | ENST00000450250 | SLC25A5P1     | chr22 | - |
| ASHG19A3A019880 | 0.000969 | 0.056823 | 14.13228 | up | noncoding | ENST00000412060 | Z83851.1      | chr22 | - |
| ASHG19A3A019881 | 0.000128 | 0.031585 | 2.785932 | up | noncoding | uc003bcm.2      | BC038245      | chr22 | - |
| ASHG19A3A019893 | 0.028703 | 0.202008 | 2.177128 | up | noncoding | ENST00000428087 | RP11-248I9.2  | chr1  | + |
| ASHG19A3A019905 | 0.008334 | 0.121096 | 2.118197 | up | noncoding | BC069767        |               | chr22 | - |
| ASHG19A3A019910 | 0.000712 | 0.051625 | 4.31782  | up | noncoding | AK125234        |               | chr22 | - |
| ASHG19A3A019949 | 0.010585 | 0.132404 | 2.987922 | up | noncoding | ENST00000413815 | RP11-191L9.5  | chr22 | - |
| ASHG19A3A020007 | 0.043891 | 0.240937 | 3.404692 | up | noncoding | ENST00000440946 | AP000525.10   | chr22 | + |
| ASHG19A3A020010 | 0.018158 | 0.166283 | 2.373694 | up | noncoding | ENST00000435410 | LA16c-59E1.2  | chr22 | + |
| ASHG19A3A020024 | 0.002942 | 0.081974 | 2.281783 | up | noncoding | ENST00000450340 | KB-67B5.11    | chr22 | + |

|                 |          |          |          |    |           |                 |               |       |   |
|-----------------|----------|----------|----------|----|-----------|-----------------|---------------|-------|---|
| ASHG19A3A020026 | 0.01016  | 0.13064  | 2.08618  | up | noncoding | NR_001591       | psiTPTE22     | chr22 | + |
| ASHG19A3A020080 | 0.023338 | 0.184707 | 2.365594 | up | noncoding | AY927637        |               | chr22 | + |
| ASHG19A3A020183 | 0.016882 | 0.160188 | 2.810693 | up | noncoding | NR_027426       | LOC648691     | chr22 | + |
| ASHG19A3A020183 | 0.016882 | 0.160188 | 2.810693 | up | noncoding | NR_027426       | LOC648691     | chr22 | + |
| ASHG19A3A020183 | 0.016882 | 0.160188 | 2.810693 | up | noncoding | NR_027426       | LOC648691     | chr22 | + |
| ASHG19A3A020183 | 0.016882 | 0.160188 | 2.810693 | up | noncoding | NR_027426       | LOC648691     | chr22 | + |
| ASHG19A3A020183 | 0.016882 | 0.160188 | 2.810693 | up | noncoding | NR_027426       | LOC648691     | chr22 | + |
| ASHG19A3A020257 | 0.001142 | 0.058346 | 3.063087 | up | noncoding | ENST00000420391 | CTA-796E4.3   | chr22 | + |
| ASHG19A3A020346 | 0.014019 | 0.147447 | 2.421861 | up | noncoding | ENST00000430449 | CTA-342B11.1  | chr22 | + |
| ASHG19A3A020355 | 4.76E-07 | 0.002381 | 51.31315 | up | noncoding | ENST00000452181 | RP1-90G24.6   | chr22 | + |
| ASHG19A3A020522 | 0.006414 | 0.109722 | 3.147431 | up | noncoding | ENST00000420096 | Z83851.4      | chr22 | + |
| ASHG19A3A020529 | 0.00705  | 0.113157 | 4.42444  | up | noncoding | ENST00000441462 | AL049757.2    | chr22 | + |
| ASHG19A3A020532 | 0.014486 | 0.149014 | 2.661779 | up | noncoding | ENST00000446663 | AL022237.3    | chr22 | + |
| ASHG19A3A020549 | 5.45E-08 | 0.000409 | 2.570802 | up | noncoding | ENST00000415702 | CTA-397C4.2   | chr22 | + |
| ASHG19A3A020571 | 0.004642 | 0.09608  | 2.015541 | up | noncoding | ENST00000416202 | RP6-109B7.3   | chr22 | + |
| ASHG19A3A020584 | 0.035448 | 0.221372 | 2.305514 | up | noncoding | ENST00000502868 | AL021392.1    | chr22 | + |
| ASHG19A3A020598 | 0.004742 | 0.0969   | 3.479237 | up | noncoding | uc003bip.2      | BC037788      | chr22 | + |
| ASHG19A3A020653 | 0.011578 | 0.137737 | 2.136572 | up | noncoding | ENST00000450418 | AC023480.1    | chr3  | - |
| ASHG19A3A020726 | 0.038142 | 0.228969 | 4.271065 | up | noncoding | ENST00000396959 | KRT18P17      | chr3  | - |
| ASHG19A3A020788 | 5E-05    | 0.021384 | 2.182403 | up | noncoding | ENST00000393779 | AC104297.1    | chr3  | - |
| ASHG19A3A020850 | 0.000372 | 0.042176 | 30.92658 | up | noncoding | BC035064        |               | chr3  | - |
| ASHG19A3A020927 | 0.005723 | 0.10433  | 2.032874 | up | noncoding | AK025048        |               | chr3  | - |
| ASHG19A3A021162 | 0.003016 | 0.082215 | 133.7595 | up | noncoding | AF088004        |               | chr3  | - |
| ASHG19A3A021313 | 0.006348 | 0.109338 | 3.295434 | up | noncoding | ENST00000468470 | RP11-159G9.4  | chr3  | - |
| ASHG19A3A021602 | 0.006774 | 0.112118 | 2.040901 | up | noncoding | AK123415        |               | chr3  | - |
| ASHG19A3A021637 | 0.000567 | 0.047322 | 9.187368 | up | noncoding | ENST00000477176 | RP11-463H24.1 | chr3  | - |
| ASHG19A3A021664 | 0.042794 | 0.238618 | 2.21995  | up | noncoding | ENST00000509986 | RP11-306L14.1 | chr3  | - |
| ASHG19A3A021781 | 0.000621 | 0.049465 | 2.560498 | up | noncoding | ENST00000428976 | RP5-882O7.3   | chr1  | + |
| ASHG19A3A021781 | 0.000621 | 0.049465 | 2.560498 | up | noncoding | ENST00000428976 | RP5-882O7.3   | chr1  | + |
| ASHG19A3A021815 | 0.006204 | 0.10778  | 5.500088 | up | noncoding | AK129645        |               | chr3  | - |
| ASHG19A3A021877 | 0.002582 | 0.076396 | 2.220826 | up | noncoding | ENST00000489012 | RP11-10O22.2  | chr3  | - |
| ASHG19A3A022052 | 0.03357  | 0.214768 | 2.300322 | up | noncoding | BC039344        |               | chr3  | - |
| ASHG19A3A022109 | 0.00842  | 0.121805 | 2.082292 | up | noncoding | ENST00000456816 | RP11-513G11.1 | chr3  | - |



|                 |          |          |          |    |           |                 |               |      |   |
|-----------------|----------|----------|----------|----|-----------|-----------------|---------------|------|---|
| ASHG19A3A022129 | 0.000421 | 0.044424 | 2.704511 | up | noncoding | uc011bta.1      | BC053580      | chr3 | - |
| ASHG19A3A022142 | 0.006524 | 0.110509 | 2.090081 | up | noncoding | ENST00000455247 | RP5-1109J22.3 | chr1 | + |
| ASHG19A3A022157 | 0.000384 | 0.042812 | 10.83329 | up | noncoding | uc003fxi.2      | MFI2          | chr3 | - |
| ASHG19A3A022243 | 0.011524 | 0.137737 | 6.520449 | up | noncoding | AK128690        |               | chr3 | + |
| ASHG19A3A022263 | 0.009075 | 0.125275 | 4.112908 | up | noncoding | ENST00000422216 | RP1-18D14.7   | chr1 | + |
| ASHG19A3A022335 | 0.038158 | 0.228969 | 2.341129 | up | noncoding | ENST00000448265 | AC139618.1    | chr3 | + |
| ASHG19A3A022438 | 0.03222  | 0.212058 | 2.291924 | up | noncoding | ENST00000454621 | AC104308.2    | chr3 | + |
| ASHG19A3A022571 | 0.01589  | 0.155377 | 2.547184 | up | noncoding | ENST00000437305 | AC094020.1    | chr3 | + |
| ASHG19A3A022572 | 0.007341 | 0.114264 | 6.349899 | up | noncoding | NR_024046       | NRADDP        | chr3 | + |
| ASHG19A3A022693 | 0.003013 | 0.082215 | 2.149045 | up | noncoding | ENST00000485935 | RP11-5O17.1   | chr3 | + |
| ASHG19A3A022693 | 0.003013 | 0.082215 | 2.149045 | up | noncoding | ENST00000485935 | RP11-5O17.1   | chr3 | + |
| ASHG19A3A022693 | 0.003013 | 0.082215 | 2.149045 | up | noncoding | ENST00000485935 | RP11-5O17.1   | chr3 | + |
| ASHG19A3A022733 | 0.027549 | 0.198387 | 3.664276 | up | noncoding | ENST00000412199 | RP11-359I18.1 | chr3 | + |
| ASHG19A3A022807 | 0.008228 | 0.120678 | 3.474494 | up | noncoding | ENST00000483483 | RP11-654C22.1 | chr3 | + |
| ASHG19A3A022860 | 0.027188 | 0.197075 | 10.26408 | up | noncoding | ENST00000473150 | KRT8P25       | chr3 | + |
| ASHG19A3A022921 | 0.000682 | 0.051022 | 5.272865 | up | noncoding | AK055026        |               | chr3 | + |
| ASHG19A3A022933 | 0.002954 | 0.081974 | 2.173912 | up | noncoding | ENST00000468519 | RP11-144C15.1 | chr3 | + |
| ASHG19A3A022933 | 0.002954 | 0.081974 | 2.173912 | up | noncoding | ENST00000468519 | RP11-144C15.1 | chr3 | + |
| ASHG19A3A023191 | 0.0004   | 0.044138 | 2.72947  | up | noncoding | ENST00000509298 | RP11-93K22.1  | chr3 | + |
| ASHG19A3A023286 | 0.004328 | 0.093653 | 3.237551 | up | noncoding | ENST00000487630 | RP11-117F22.1 | chr3 | + |
| ASHG19A3A023332 | 0.015104 | 0.152727 | 2.296505 | up | noncoding | ENST00000416440 | RP11-430G17.1 | chr1 | + |
| ASHG19A3A023427 | 0.009197 | 0.125952 | 2.428073 | up | noncoding | ENST00000488873 | RP11-100F22.1 | chr3 | + |
| ASHG19A3A023427 | 0.009197 | 0.125952 | 2.428073 | up | noncoding | ENST00000488873 | RP11-100F22.1 | chr3 | + |
| ASHG19A3A023427 | 0.009197 | 0.125952 | 2.428073 | up | noncoding | ENST00000488873 | RP11-100F22.1 | chr3 | + |
| ASHG19A3A023459 | 0.003406 | 0.084873 | 2.004072 | up | noncoding | uc003fcz.1      | CR607754      | chr3 | + |
| ASHG19A3A023474 | 0.033283 | 0.21454  | 2.44467  | up | noncoding | AK055510        |               | chr3 | + |
| ASHG19A3A023526 | 0.043653 | 0.24045  | 17.92596 | up | noncoding | ENST00000463294 | KRT8P13       | chr3 | + |
| ASHG19A3A023611 | 0.007753 | 0.117025 | 3.493409 | up | noncoding | uc003fln.1      | BC013229      | chr3 | + |
| ASHG19A3A023612 | 0.004917 | 0.098355 | 6.370644 | up | noncoding | uc003flo.2      | BC040935      | chr3 | + |
| ASHG19A3A023782 | 0.012574 | 0.142131 | 4.682778 | up | noncoding | CR601211        |               | chr3 | + |
| ASHG19A3A023873 | 0.042611 | 0.238285 | 4.840448 | up | noncoding | ENST00000514073 | AC226119.4    | chr4 | - |
| ASHG19A3A023980 | 0.042519 | 0.238285 | 2.252981 | up | noncoding | AK026407        |               | chr4 | - |
| ASHG19A3A023992 | 0.004949 | 0.098474 | 3.852564 | up | noncoding | uc003gpc.2      | BC029598      | chr4 | - |

|                 |          |          |          |    |           |                 |                |      |   |
|-----------------|----------|----------|----------|----|-----------|-----------------|----------------|------|---|
| ASHG19A3A024004 | 0.001088 | 0.057512 | 2.792532 | up | noncoding | ENST00000505347 | RP11-3J1.1     | chr4 | - |
| ASHG19A3A024019 | 0.010422 | 0.131883 | 2.01421  | up | noncoding | ENST00000515267 | AC006052.1     | chr4 | - |
| ASHG19A3A024034 | 0.013574 | 0.145812 | 4.797591 | up | noncoding | ENST00000507819 | RP11-302F12.8  | chr4 | - |
| ASHG19A3A024089 | 0.016481 | 0.157948 | 2.187799 | up | noncoding | CR603564        |                | chr4 | - |
| ASHG19A3A024125 | 0.014269 | 0.147962 | 3.474055 | up | noncoding | ENST00000509098 | RP11-663P9.1   | chr4 | - |
| ASHG19A3A024179 | 0.030622 | 0.207791 | 2.911396 | up | noncoding | ENST00000454756 | AC104066.1     | chr4 | - |
| ASHG19A3A024188 | 0.003001 | 0.082215 | 2.089934 | up | noncoding | ENST00000512628 | RP11-545H22.1  | chr4 | - |
| ASHG19A3A024340 | 0.000955 | 0.056576 | 4.520595 | up | noncoding | ENST00000513770 | RP11-44F21.2   | chr4 | - |
| ASHG19A3A024375 | 0.000128 | 0.031585 | 4.886089 | up | noncoding | ENST00000505100 | CTB-179I1.3    | chr4 | - |
| ASHG19A3A024416 | 0.042388 | 0.238285 | 2.082346 | up | noncoding | uc003hnq.2      | KIAA0905       | chr4 | - |
| ASHG19A3A024457 | 0.025801 | 0.193125 | 2.202235 | up | noncoding | ENST00000444365 | RP11-397E7.3   | chr4 | - |
| ASHG19A3A024509 | 0.043109 | 0.238904 | 2.030333 | up | noncoding | uc003huc.1      | AK098333       | chr4 | - |
| ASHG19A3A024647 | 0.028503 | 0.201361 | 2.401216 | up | noncoding | ENST00000441170 | AC092661.2     | chr4 | - |
| ASHG19A3A024691 | 0.027042 | 0.196393 | 2.293722 | up | noncoding | ENST00000480069 | RP11-170N16.1  | chr4 | - |
| ASHG19A3A024810 | 0.009237 | 0.126124 | 2.279935 | up | noncoding | ENST00000509609 | RP13-539F13.2  | chr4 | - |
| ASHG19A3A024868 | 0.003042 | 0.082215 | 2.570968 | up | noncoding | uc003ine.2      | BC039551       | chr4 | - |
| ASHG19A3A024892 | 0.000339 | 0.041094 | 3.40572  | up | noncoding | ENST00000514997 | RP11-627H22.10 | chr4 | - |
| ASHG19A3A024896 | 0.031215 | 0.208947 | 2.366391 | up | noncoding | ENST00000503214 | RP11-627H22.6  | chr4 | - |
| ASHG19A3A024898 | 0.031298 | 0.208947 | 2.502308 | up | noncoding | ENST00000506452 | RP11-627H22.4  | chr4 | - |
| ASHG19A3A024899 | 0.022396 | 0.182011 | 3.369697 | up | noncoding | ENST00000510572 | RP11-627H22.3  | chr4 | - |
| ASHG19A3A025011 | 0.029884 | 0.205361 | 2.427541 | up | noncoding | ENST00000503325 | RP11-161D15.3  | chr4 | - |
| ASHG19A3A025094 | 0.027602 | 0.19852  | 2.353354 | up | noncoding | AK095895        |                | chr4 | - |
| ASHG19A3A025096 | 0.018371 | 0.166877 | 2.189087 | up | noncoding | ENST00000515328 | SLC25A5P6      | chr4 | - |
| ASHG19A3A025216 | 0.022743 | 0.182545 | 3.8184   | up | noncoding | uc003gid.2      | BC025734       | chr4 | + |
| ASHG19A3A025224 | 0.001822 | 0.067812 | 2.356962 | up | noncoding | G65572          |                | chr4 | + |
| ASHG19A3A025224 | 0.001822 | 0.067812 | 2.356962 | up | noncoding | G65572          |                | chr4 | + |
| ASHG19A3A025295 | 0.01506  | 0.152587 | 2.747287 | up | noncoding | ENST00000514103 | RP11-1J7.1     | chr4 | + |
| ASHG19A3A025297 | 0.007359 | 0.114264 | 2.069319 | up | noncoding | ENST00000515691 | RP11-168E17.1  | chr4 | + |
| ASHG19A3A025333 | 0.048239 | 0.250288 | 3.61717  | up | noncoding | ENST00000505463 | RP11-414P19.1  | chr4 | + |
| ASHG19A3A025333 | 0.048239 | 0.250288 | 3.61717  | up | noncoding | ENST00000505463 | RP11-414P19.1  | chr4 | + |
| ASHG19A3A025395 | 0.038754 | 0.230358 | 19.51691 | up | noncoding | ENST00000507715 | RP11-802H3.1   | chr4 | + |
| ASHG19A3A025439 | 0.020034 | 0.173521 | 2.310096 | up | noncoding | ENST00000506347 | RP11-333E13.1  | chr4 | + |
| ASHG19A3A025439 | 0.020034 | 0.173521 | 2.310096 | up | noncoding | ENST00000506347 | RP11-333E13.1  | chr4 | + |

|                 |          |          |          |    |           |                 |               |      |   |
|-----------------|----------|----------|----------|----|-----------|-----------------|---------------|------|---|
| ASHG19A3A025449 | 0.024487 | 0.188533 | 4.044128 | up | noncoding | ENST00000481627 | RP11-588L15.1 | chr4 | + |
| ASHG19A3A025449 | 0.024487 | 0.188533 | 4.044128 | up | noncoding | ENST00000481627 | RP11-588L15.1 | chr4 | + |
| ASHG19A3A025467 | 0.006799 | 0.112118 | 2.174179 | up | noncoding | ENST00000463499 | RP11-49F1.1   | chr4 | + |
| ASHG19A3A025467 | 0.006799 | 0.112118 | 2.174179 | up | noncoding | ENST00000463499 | RP11-49F1.1   | chr4 | + |
| ASHG19A3A025807 | 0.007206 | 0.113881 | 2.311675 | up | noncoding | ENST00000478069 | RP11-398J16.1 | chr4 | + |
| ASHG19A3A025851 | 0.00159  | 0.065335 | 2.158362 | up | noncoding | ENST00000413177 | RP11-289C17.1 | chr4 | + |
| ASHG19A3A025891 | 0.01583  | 0.15529  | 2.038346 | up | noncoding | AK124503        |               | chr1 | + |
| ASHG19A3A025971 | 0.006635 | 0.111344 | 4.403507 | up | noncoding | uc003ide.3      | CR610292      | chr4 | + |
| ASHG19A3A025971 | 0.006635 | 0.111344 | 4.403507 | up | noncoding | uc003ide.3      | CR610292      | chr4 | + |
| ASHG19A3A025971 | 0.006635 | 0.111344 | 4.403507 | up | noncoding | uc003ide.3      | CR610292      | chr4 | + |
| ASHG19A3A026010 | 0.024275 | 0.187158 | 3.792041 | up | noncoding | AK090904        |               | chr4 | + |
| ASHG19A3A026043 | 0.004778 | 0.097112 | 2.303804 | up | noncoding | ENST00000503009 | RP11-400D2.3  | chr4 | + |
| ASHG19A3A026093 | 0.00244  | 0.07493  | 2.572141 | up | noncoding | BC041977        |               | chr1 | + |
| ASHG19A3A026163 | 0.047224 | 0.248687 | 2.828496 | up | noncoding | BC034819        |               | chr4 | + |
| ASHG19A3A026327 | 0.000812 | 0.053939 | 2.323708 | up | noncoding | ENST00000513552 | RP11-753I4.1  | chr4 | + |
| ASHG19A3A026346 | 0.03186  | 0.211064 | 144.1995 | up | noncoding | ENST00000423200 | RP11-433O3.1  | chr4 | + |
| ASHG19A3A026395 | 0.016817 | 0.159853 | 2.079836 | up | noncoding | ENST00000507644 | RP11-11N5.1   | chr4 | + |
| ASHG19A3A026454 | 0.00115  | 0.058346 | 2.057443 | up | noncoding | ENST00000434734 | RP4-684L20.2  | chr1 | + |
| ASHG19A3A026589 | 0.005885 | 0.105103 | 2.504571 | up | noncoding | ENST00000508480 | RP11-432M8.19 | chr5 | - |
| ASHG19A3A026607 | 0.000774 | 0.053305 | 2.403021 | up | noncoding | ENST00000509054 | CTD-2272G21.3 | chr5 | - |
| ASHG19A3A026618 | 0.002764 | 0.080291 | 3.643077 | up | noncoding | ENST00000507887 | CTD-2306M5.1  | chr5 | - |
| ASHG19A3A026707 | 0.001648 | 0.066029 | 2.329411 | up | noncoding | ENST00000508986 | CTD-2108O9.1  | chr5 | - |
| ASHG19A3A026707 | 0.001648 | 0.066029 | 2.329411 | up | noncoding | ENST00000508986 | CTD-2108O9.1  | chr5 | - |
| ASHG19A3A026707 | 0.001648 | 0.066029 | 2.329411 | up | noncoding | ENST00000508986 | CTD-2108O9.1  | chr5 | - |
| ASHG19A3A026732 | 0.004882 | 0.098198 | 2.254031 | up | noncoding | AL137450        |               | chr5 | - |
| ASHG19A3A026767 | 0.030143 | 0.206112 | 2.977172 | up | noncoding | ENST00000503452 | RP11-53O19.1  | chr5 | - |
| ASHG19A3A026841 | 0.047163 | 0.248625 | 13.42854 | up | noncoding | ENST00000504812 | RP11-109B6.2  | chr5 | - |
| ASHG19A3A026877 | 0.005869 | 0.105103 | 2.003531 | up | noncoding | AK098535        |               | chr5 | - |
| ASHG19A3A026877 | 0.005869 | 0.105103 | 2.003531 | up | noncoding | AK098535        |               | chr5 | - |
| ASHG19A3A026883 | 0.017587 | 0.164169 | 2.499584 | up | noncoding | ENST00000514578 | RP11-83M16.4  | chr5 | - |
| ASHG19A3A026995 | 0.028498 | 0.201361 | 5.485885 | up | noncoding | BC021677        |               | chr5 | - |
| ASHG19A3A027004 | 0.023472 | 0.185051 | 2.666194 | up | noncoding | ENST00000509131 | CTC-431G16.3  | chr5 | - |
| ASHG19A3A027008 | 6.21E-05 | 0.022687 | 2.126    | up | noncoding | ENST00000512910 | RP11-168A11.3 | chr5 | - |

|                 |          |          |          |    |           |                 |               |      |   |
|-----------------|----------|----------|----------|----|-----------|-----------------|---------------|------|---|
| ASHG19A3A027049 | 0.005287 | 0.101436 | 2.187613 | up | noncoding | ENST00000510845 | CTD-2015A6.2  | chr5 | - |
| ASHG19A3A027163 | 0.04462  | 0.242638 | 19.6635  | up | noncoding | ENST00000512863 | RP11-474J18.4 | chr5 | - |
| ASHG19A3A027275 | 0.026078 | 0.193675 | 2.745134 | up | noncoding | ENST00000513004 | RP11-74D3.1   | chr5 | - |
| ASHG19A3A027328 | 0.012947 | 0.143422 | 4.000606 | up | noncoding | AK123774        |               | chr5 | - |
| ASHG19A3A027328 | 0.012947 | 0.143422 | 4.000606 | up | noncoding | AK123774        |               | chr5 | - |
| ASHG19A3A027328 | 0.012947 | 0.143422 | 4.000606 | up | noncoding | AK123774        |               | chr5 | - |
| ASHG19A3A027397 | 0.000787 | 0.053476 | 3.056607 | up | noncoding | uc003kyl.2      | AF086294      | chr5 | - |
| ASHG19A3A027398 | 0.003209 | 0.083261 | 2.753276 | up | noncoding | ENST00000467206 | CTB-49A3.1    | chr5 | - |
| ASHG19A3A027478 | 6.8E-05  | 0.022687 | 2.77602  | up | noncoding | ENST00000507521 | CTC-329D1.2   | chr5 | - |
| ASHG19A3A027478 | 6.8E-05  | 0.022687 | 2.77602  | up | noncoding | ENST00000507521 | CTC-329D1.2   | chr5 | - |
| ASHG19A3A027478 | 6.8E-05  | 0.022687 | 2.77602  | up | noncoding | ENST00000507521 | CTC-329D1.2   | chr5 | - |
| ASHG19A3A027478 | 6.8E-05  | 0.022687 | 2.77602  | up | noncoding | ENST00000507521 | CTC-329D1.2   | chr5 | - |
| ASHG19A3A027478 | 6.8E-05  | 0.022687 | 2.77602  | up | noncoding | ENST00000507521 | CTC-329D1.2   | chr5 | - |
| ASHG19A3A027478 | 6.8E-05  | 0.022687 | 2.77602  | up | noncoding | ENST00000507521 | CTC-329D1.2   | chr5 | - |
| ASHG19A3A027509 | 0.045521 | 0.244261 | 2.178154 | up | noncoding | AK127336        |               | chr5 | - |
| ASHG19A3A027513 | 0.028936 | 0.202608 | 2.189214 | up | noncoding | ENST00000515639 | AC005740.3    | chr5 | - |
| ASHG19A3A027743 | 0.005843 | 0.104974 | 5.246702 | up | noncoding | uc003mgt.2      | BC041422      | chr5 | - |
| ASHG19A3A027743 | 0.005843 | 0.104974 | 5.246702 | up | noncoding | uc003mgt.2      | BC041422      | chr5 | - |
| ASHG19A3A027743 | 0.005843 | 0.104974 | 5.246702 | up | noncoding | uc003mgt.2      | BC041422      | chr5 | - |
| ASHG19A3A027743 | 0.005843 | 0.104974 | 5.246702 | up | noncoding | uc003mgt.2      | BC041422      | chr5 | - |
| ASHG19A3A027743 | 0.005843 | 0.104974 | 5.246702 | up | noncoding | uc003mgt.2      | BC041422      | chr5 | - |
| ASHG19A3A027743 | 0.005843 | 0.104974 | 5.246702 | up | noncoding | uc003mgt.2      | BC041422      | chr5 | - |
| ASHG19A3A027805 | 0.017234 | 0.162078 | 2.13386  | up | noncoding | ENST00000502787 | RP11-451H23.2 | chr5 | - |
| ASHG19A3A027856 | 0.03121  | 0.208947 | 3.213835 | up | noncoding | AK125665        |               | chr1 | + |
| ASHG19A3A027856 | 0.03121  | 0.208947 | 3.213835 | up | noncoding | AK125665        |               | chr1 | + |
| ASHG19A3A027856 | 0.03121  | 0.208947 | 3.213835 | up | noncoding | AK125665        |               | chr1 | + |
| ASHG19A3A027856 | 0.03121  | 0.208947 | 3.213835 | up | noncoding | AK125665        |               | chr1 | + |
| ASHG19A3A027856 | 0.03121  | 0.208947 | 3.213835 | up | noncoding | AK125665        |               | chr1 | + |
| ASHG19A3A027865 | 0.010784 | 0.133412 | 3.413644 | up | noncoding | ENST00000503386 | CTD-2194D22.1 | chr5 | + |
| ASHG19A3A027953 | 0.045126 | 0.243678 | 3.224106 | up | noncoding | AF009267        |               | chr5 | + |
| ASHG19A3A028023 | 0.028333 | 0.200961 | 2.432813 | up | noncoding | ENST00000502928 | RP11-811J10.1 | chr5 | + |
| ASHG19A3A028027 | 0.00062  | 0.049465 | 2.316743 | up | noncoding | ENST00000503199 | RP11-704G19.1 | chr5 | + |
| ASHG19A3A028053 | 0.021162 | 0.176675 | 3.022287 | up | noncoding | ENST00000512207 | RP11-42L13.2  | chr5 | + |

|                 |          |          |          |    |           |                 |                  |      |   |
|-----------------|----------|----------|----------|----|-----------|-----------------|------------------|------|---|
| ASHG19A3A028132 | 0.000622 | 0.049465 | 3.251348 | up | noncoding | ENST00000500817 | CTD-2196P11.1    | chr5 | + |
| ASHG19A3A028251 | 0.049838 | 0.252541 | 3.26587  | up | noncoding | BC020897        |                  | chr5 | + |
| ASHG19A3A028300 | 0.001091 | 0.057512 | 4.111572 | up | noncoding | ENST00000515077 | CTD-2187J20.1    | chr5 | + |
| ASHG19A3A028307 | 0.008337 | 0.121096 | 2.04987  | up | noncoding | ENST00000515504 | CTC-537E7.1      | chr5 | + |
| ASHG19A3A028338 | 0.001276 | 0.06217  | 3.666278 | up | noncoding | uc001edc.1      | BC047723         | chr1 | + |
| ASHG19A3A028338 | 0.001276 | 0.06217  | 3.666278 | up | noncoding | uc001edc.1      | BC047723         | chr1 | + |
| ASHG19A3A028412 | 0.000747 | 0.051923 | 6.94053  | up | noncoding | ENST00000514114 | CTC-564N23.3     | chr5 | + |
| ASHG19A3A028569 | 0.00152  | 0.064446 | 2.630196 | up | noncoding | ENST00000514852 | RP11-475J5.1     | chr5 | + |
| ASHG19A3A028678 | 0.014968 | 0.151895 | 2.419847 | up | noncoding | ENST00000354355 | CTB-161M19.3     | chr5 | + |
| ASHG19A3A028965 | 0.02035  | 0.174085 | 2.009099 | up | noncoding | ENST00000496103 | CTD-2024I7.1     | chr5 | + |
| ASHG19A3A028965 | 0.02035  | 0.174085 | 2.009099 | up | noncoding | ENST00000496103 | CTD-2024I7.1     | chr5 | + |
| ASHG19A3A028987 | 0.001438 | 0.062929 | 3.068346 | up | noncoding | ENST00000511084 | CTB-85P21.1      | chr5 | + |
| ASHG19A3A029023 | 0.005337 | 0.101513 | 3.204804 | up | noncoding | AK055194        |                  | chr1 | + |
| ASHG19A3A029234 | 0.013697 | 0.14631  | 2.162887 | up | noncoding | ENST00000428930 | BX571672.1       | chr1 | + |
| ASHG19A3A029278 | 0.041234 | 0.236689 | 2.372475 | up | noncoding | ENST00000501148 | CTC-205M6.1      | chr5 | + |
| ASHG19A3A029278 | 0.041234 | 0.236689 | 2.372475 | up | noncoding | ENST00000501148 | CTC-205M6.1      | chr5 | + |
| ASHG19A3A029299 | 0.015987 | 0.155645 | 3.623442 | up | noncoding | ENST00000512030 | AC138030.2       | chr5 | + |
| ASHG19A3A029307 | 0.015207 | 0.152873 | 2.078921 | up | noncoding | uc003mti.1      | AK093403         | chr6 | - |
| ASHG19A3A029401 | 0.003973 | 0.089603 | 3.867703 | up | noncoding | ENST00000420389 | RP1-290I10.3     | chr6 | - |
| ASHG19A3A029410 | 0.040975 | 0.236152 | 2.17327  | up | noncoding | uc003mzj.1      | CR622974         | chr6 | - |
| ASHG19A3A029410 | 0.040975 | 0.236152 | 2.17327  | up | noncoding | uc003mzj.1      | CR622974         | chr6 | - |
| ASHG19A3A029546 | 0.000956 | 0.056576 | 2.361129 | up | noncoding | uc003nie.1      | AK097539         | chr6 | - |
| ASHG19A3A029551 | 0.032371 | 0.212255 | 4.134469 | up | noncoding | NR_026776       | LOC100270746     | chr6 | - |
| ASHG19A3A029561 | 0.036386 | 0.223695 | 4.424059 | up | noncoding | AK095259        |                  | chr6 | - |
| ASHG19A3A029596 | 0.00047  | 0.045345 | 5.944977 | up | noncoding | ENST00000457253 | XXbac-BPG308K3.5 | chr6 | - |
| ASHG19A3A029631 | 0.021156 | 0.176675 | 2.698797 | up | noncoding | uc003rsi.3      | DKFZp762B162     | chr6 | - |
| ASHG19A3A029636 | 0.048846 | 0.251499 | 2.363669 | up | noncoding | ENST00000453429 | RPL7AP7          | chr6 | - |
| ASHG19A3A029773 | 0.012866 | 0.14335  | 3.503082 | up | noncoding | ENST00000433582 | HLA-DPA2         | chr6 | - |
| ASHG19A3A029827 | 0.002307 | 0.074504 | 2.208553 | up | noncoding | NR_027117       | LOC285847        | chr6 | - |
| ASHG19A3A029827 | 0.002307 | 0.074504 | 2.208553 | up | noncoding | NR_027117       | LOC285847        | chr6 | - |
| ASHG19A3A029891 | 0.003892 | 0.089011 | 4.146873 | up | noncoding | ENST00000422246 | RP13-235E23.1    | chr6 | - |
| ASHG19A3A029895 | 0.000225 | 0.035463 | 11.43034 | up | noncoding | ENST00000440194 | RP11-328M4.2     | chr6 | - |
| ASHG19A3A029895 | 0.000225 | 0.035463 | 11.43034 | up | noncoding | ENST00000440194 | RP11-328M4.2     | chr6 | - |

|                 |          |          |          |    |           |                 |                    |      |   |
|-----------------|----------|----------|----------|----|-----------|-----------------|--------------------|------|---|
| ASHG19A3A029895 | 0.000225 | 0.035463 | 11.43034 | up | noncoding | ENST00000440194 | RP11-328M4.2       | chr6 | - |
| ASHG19A3A030087 | 0.024523 | 0.188533 | 2.144884 | up | noncoding | ENST00000423899 | XXbac-BPG55C20.1   | chr6 | - |
| ASHG19A3A030123 | 0.023963 | 0.185992 | 2.00697  | up | noncoding | ENST00000404247 | RP11-160A9.1       | chr6 | - |
| ASHG19A3A030134 | 0.000456 | 0.045084 | 2.274681 | up | noncoding | ENST00000429832 | RP11-257K9.2       | chr6 | - |
| ASHG19A3A030134 | 0.000456 | 0.045084 | 2.274681 | up | noncoding | ENST00000429832 | RP11-257K9.2       | chr6 | - |
| ASHG19A3A030134 | 0.000456 | 0.045084 | 2.274681 | up | noncoding | ENST00000429832 | RP11-257K9.2       | chr6 | - |
| ASHG19A3A030134 | 0.000456 | 0.045084 | 2.274681 | up | noncoding | ENST00000429832 | RP11-257K9.2       | chr6 | - |
| ASHG19A3A030134 | 0.000456 | 0.045084 | 2.274681 | up | noncoding | ENST00000429832 | RP11-257K9.2       | chr6 | - |
| ASHG19A3A030143 | 0.005926 | 0.105251 | 3.310354 | up | noncoding | ENST00000421830 | RP11-398K22.5      | chr6 | - |
| ASHG19A3A030150 | 0.011064 | 0.135071 | 7.364687 | up | noncoding | ENST00000422157 | RP6-74O6.3         | chr1 | + |
| ASHG19A3A030170 | 0.035468 | 0.221401 | 3.318444 | up | noncoding | BX537762        |                    | chr6 | - |
| ASHG19A3A030189 | 0.003219 | 0.083261 | 2.438748 | up | noncoding | ENST00000415381 | RP11-301M17.1      | chr1 | + |
| ASHG19A3A030232 | 0.000268 | 0.03723  | 2.27594  | up | noncoding | ENST00000440916 | RP11-666A1.4       | chr1 | + |
| ASHG19A3A030247 | 0.017715 | 0.164846 | 3.482303 | up | noncoding | NR_002767       | NCRNA00120         | chr6 | - |
| ASHG19A3A030374 | 0.006397 | 0.109654 | 6.36429  | up | noncoding | uc010pbe.1      | BC062745           | chr1 | + |
| ASHG19A3A030491 | 0.033689 | 0.215126 | 2.760035 | up | noncoding | G43180          |                    | chr6 | - |
| ASHG19A3A030529 | 0.022717 | 0.182507 | 5.694971 | up | noncoding | ENST00000455305 | RP1-131F15.2       | chr6 | - |
| ASHG19A3A030582 | 0.040286 | 0.234326 | 7.749765 | up | noncoding | AJ420543        |                    | chr6 | - |
| ASHG19A3A030624 | 2.21E-05 | 0.015802 | 2.090869 | up | noncoding | ENST00000445585 | RP5-899B16.2       | chr6 | - |
| ASHG19A3A030703 | 0.021003 | 0.176175 | 2.092961 | up | noncoding | ENST00000445833 | RP1-292B18.3       | chr6 | - |
| ASHG19A3A030838 | 0.007942 | 0.118775 | 2.067521 | up | noncoding | ENST00000416709 | RP11-503C24.5      | chr6 | - |
| ASHG19A3A030890 | 0.033641 | 0.214932 | 2.672106 | up | noncoding | NR_026855       | DKFZP686I15217     | chr6 | + |
| ASHG19A3A030916 | 0.00299  | 0.082215 | 3.312209 | up | noncoding | AF210650        |                    | chr6 | + |
| ASHG19A3A030993 | 0.004708 | 0.096398 | 4.451318 | up | noncoding | ENST00000437559 | RP11-456H18.2      | chr6 | + |
| ASHG19A3A031013 | 0.010781 | 0.133412 | 2.360727 | up | noncoding | ENST00000447179 | RP11-146I2.2       | chr6 | + |
| ASHG19A3A031136 | 0.005561 | 0.102884 | 4.047496 | up | noncoding | ENST00000424968 | RP11-373D17.1      | chr6 | + |
| ASHG19A3A031287 | 0.044925 | 0.243659 | 2.536365 | up | noncoding | ENST00000420520 | XXbac-BPG296P20.15 | chr6 | + |
| ASHG19A3A031287 | 0.044925 | 0.243659 | 2.536365 | up | noncoding | ENST00000420520 | XXbac-BPG296P20.15 | chr6 | + |
| ASHG19A3A031324 | 0.00172  | 0.067108 | 2.126424 | up | noncoding | NR_026717       | STK19              | chr6 | + |
| ASHG19A3A031324 | 0.00172  | 0.067108 | 2.126424 | up | noncoding | NR_026717       | STK19              | chr6 | + |
| ASHG19A3A031324 | 0.00172  | 0.067108 | 2.126424 | up | noncoding | NR_026717       | STK19              | chr6 | + |
| ASHG19A3A031508 | 2.86E-05 | 0.017174 | 3.950712 | up | noncoding | ENST00000443470 | RP4-696P19.2       | chr6 | + |

|                 |          |          |          |    |           |                 |                  |      |   |
|-----------------|----------|----------|----------|----|-----------|-----------------|------------------|------|---|
| ASHG19A3A031530 | 0.042031 | 0.238285 | 2.923225 | up | noncoding | AK124352        |                  | chr6 | + |
| ASHG19A3A031666 | 0.039456 | 0.231752 | 2.427901 | up | noncoding | ENST00000406100 | XXbac-BPG55C20.3 | chr6 | + |
| ASHG19A3A031670 | 0.000683 | 0.051022 | 3.384547 | up | noncoding | ENST00000405686 | RP11-448N11.2    | chr6 | + |
| ASHG19A3A031687 | 0.019793 | 0.172759 | 3.488421 | up | noncoding | ENST00000441288 | RP11-759F5.1     | chr1 | + |
| ASHG19A3A031732 | 0.00248  | 0.075264 | 2.432369 | up | noncoding | ENST00000404728 | RP11-9G10.1      | chr6 | + |
| ASHG19A3A031746 | 0.016686 | 0.159415 | 4.573456 | up | noncoding | ENST00000406279 | RP11-551A13.1    | chr6 | + |
| ASHG19A3A032019 | 0.018963 | 0.168824 | 2.331819 | up | noncoding | ENST00000406156 | RP11-129H15.2    | chr6 | + |
| ASHG19A3A032085 | 0.001416 | 0.062929 | 5.327291 | up | noncoding | ENST00000402375 | RP1-55C23.4      | chr6 | + |
| ASHG19A3A032113 | 0.009815 | 0.129201 | 2.132969 | up | noncoding | ENST00000403956 | RP3-406A7.1      | chr6 | + |
| ASHG19A3A032236 | 0.007545 | 0.115275 | 4.477402 | up | noncoding | ENST00000405526 | RP11-331O9.4     | chr6 | + |
| ASHG19A3A032394 | 0.000587 | 0.048475 | 16.74046 | up | noncoding | ENST00000453348 | AC074389.9       | chr7 | - |
| ASHG19A3A032418 | 0.013912 | 0.146871 | 2.606704 | up | noncoding | ENST00000515163 | AC092610.1       | chr7 | - |
| ASHG19A3A032430 | 0.02492  | 0.189893 | 2.569567 | up | noncoding | G30758          |                  | chr7 | - |
| ASHG19A3A032436 | 0.001446 | 0.062929 | 2.020839 | up | noncoding | CR609520        |                  | chr1 | + |
| ASHG19A3A032445 | 0.018136 | 0.166283 | 2.341049 | up | noncoding | ENST00000496556 | AC072052.7       | chr7 | - |
| ASHG19A3A032527 | 0.001498 | 0.063924 | 3.453042 | up | noncoding | ENST00000435098 | AC002486.3       | chr7 | - |
| ASHG19A3A032616 | 0.028933 | 0.202608 | 2.050134 | up | noncoding | ENST00000442865 | AC007255.7       | chr7 | - |
| ASHG19A3A032647 | 0.04228  | 0.238285 | 2.382883 | up | noncoding | AK055377        |                  | chr1 | + |
| ASHG19A3A032647 | 0.04228  | 0.238285 | 2.382883 | up | noncoding | AK055377        |                  | chr1 | + |
| ASHG19A3A032809 | 0.02287  | 0.1828   | 2.470807 | up | noncoding | ENST00000444843 | CTD-2021A8.2     | chr7 | - |
| ASHG19A3A032810 | 0.021002 | 0.176175 | 2.421308 | up | noncoding | ENST00000434161 | CTD-2021A8.3     | chr7 | - |
| ASHG19A3A032865 | 0.001942 | 0.070266 | 2.899183 | up | noncoding | ENST00000452517 | AC073057.5       | chr7 | - |
| ASHG19A3A032876 | 0.038159 | 0.228969 | 24.36996 | up | noncoding | ENST00000414328 | RP11-110J1.3     | chr1 | + |
| ASHG19A3A032878 | 0.010979 | 0.135046 | 6.079121 | up | noncoding | ENST00000424595 | RP11-196D18.4    | chr7 | - |
| ASHG19A3A032908 | 0.042087 | 0.238285 | 2.389226 | up | noncoding | ENST00000507767 | RP11-3N2.12      | chr7 | - |
| ASHG19A3A032948 | 0.000829 | 0.053939 | 4.475419 | up | noncoding | ENST00000450353 | GS1-124K5.3      | chr7 | - |
| ASHG19A3A032983 | 0.04139  | 0.236689 | 2.960832 | up | noncoding | uc003twl.2      | WBSCR20C         | chr7 | - |
| ASHG19A3A033019 | 0.018404 | 0.166892 | 3.180317 | up | noncoding | ENST00000419670 | NCF1C            | chr7 | - |
| ASHG19A3A033073 | 0.013411 | 0.145745 | 2.596216 | up | noncoding | uc003ugj.1      | BC037783         | chr7 | - |
| ASHG19A3A033105 | 0.012916 | 0.143422 | 2.180113 | up | noncoding | ENST00000490124 | AC074183.3       | chr7 | - |
| ASHG19A3A033116 | 0.032214 | 0.212058 | 2.524117 | up | noncoding | uc003uig.2      | BC035377         | chr7 | - |
| ASHG19A3A033116 | 0.032214 | 0.212058 | 2.524117 | up | noncoding | uc003uig.2      | BC035377         | chr7 | - |
| ASHG19A3A033116 | 0.032214 | 0.212058 | 2.524117 | up | noncoding | uc003uig.2      | BC035377         | chr7 | - |

|                 |          |          |          |    |           |                 |               |      |   |
|-----------------|----------|----------|----------|----|-----------|-----------------|---------------|------|---|
| ASHG19A3A033130 | 0.042317 | 0.238285 | 2.493861 | up | noncoding | ENST00000415667 | AC002069.7    | chr7 | - |
| ASHG19A3A033181 | 0.019271 | 0.170454 | 2.050149 | up | noncoding | AK094892        |               | chr7 | - |
| ASHG19A3A033181 | 0.019271 | 0.170454 | 2.050149 | up | noncoding | AK094892        |               | chr7 | - |
| ASHG19A3A033181 | 0.019271 | 0.170454 | 2.050149 | up | noncoding | AK094892        |               | chr7 | - |
| ASHG19A3A033181 | 0.019271 | 0.170454 | 2.050149 | up | noncoding | AK094892        |               | chr7 | - |
| ASHG19A3A033181 | 0.019271 | 0.170454 | 2.050149 | up | noncoding | AK094892        |               | chr7 | - |
| ASHG19A3A033267 | 0.007007 | 0.113157 | 3.054815 | up | noncoding | ENST00000412754 | RP11-126L15.4 | chr7 | - |
| ASHG19A3A033274 | 0.039064 | 0.230532 | 2.186395 | up | noncoding | uc003uxn.1      | AK096803      | chr7 | - |
| ASHG19A3A033447 | 0.003405 | 0.084873 | 2.526866 | up | noncoding | BC040843        |               | chr7 | - |
| ASHG19A3A033499 | 0.000828 | 0.053939 | 2.882756 | up | noncoding | uc003vmn.2      | MGC27345      | chr7 | - |
| ASHG19A3A033507 | 0.002268 | 0.074497 | 4.495733 | up | noncoding | ENST00000501627 | AC010655.1    | chr7 | - |
| ASHG19A3A033507 | 0.002268 | 0.074497 | 4.495733 | up | noncoding | ENST00000501627 | AC010655.1    | chr7 | - |
| ASHG19A3A033563 | 0.024902 | 0.189853 | 2.102809 | up | noncoding | ENST00000431248 | AC093106.5    | chr7 | - |
| ASHG19A3A033583 | 0.007242 | 0.113881 | 2.18082  | up | noncoding | AK056910        |               | chr7 | - |
| ASHG19A3A033601 | 0.009162 | 0.125764 | 3.994491 | up | noncoding | ENST00000418798 | AC013429.5    | chr7 | - |
| ASHG19A3A033601 | 0.009162 | 0.125764 | 3.994491 | up | noncoding | ENST00000418798 | AC013429.5    | chr7 | - |
| ASHG19A3A033662 | 0.023917 | 0.185925 | 2.636612 | up | noncoding | ENST00000481590 | TRBV8-1       | chr7 | - |
| ASHG19A3A033670 | 0.001337 | 0.06217  | 6.995287 | up | noncoding | ENST00000496431 | OR9P1P        | chr7 | - |
| ASHG19A3A033695 | 0.006706 | 0.112118 | 2.326037 | up | noncoding | uc003wed.2      | BC040701      | chr7 | - |
| ASHG19A3A033706 | 0.049123 | 0.25214  | 3.200554 | up | noncoding | ENST00000434887 | AC006004.1    | chr7 | - |
| ASHG19A3A033717 | 7.19E-05 | 0.023471 | 2.991913 | up | noncoding | ENST00000461005 | RP4-800G7.1   | chr7 | - |
| ASHG19A3A033718 | 0.019032 | 0.169037 | 2.360231 | up | noncoding | AY927503        |               | chr7 | - |
| ASHG19A3A033729 | 0.001961 | 0.070296 | 4.19654  | up | noncoding | ENST00000297369 | RP11-728K20.1 | chr7 | - |
| ASHG19A3A033734 | 0.009049 | 0.125138 | 2.586257 | up | noncoding | AL162065        |               | chr7 | - |
| ASHG19A3A033734 | 0.009049 | 0.125138 | 2.586257 | up | noncoding | AL162065        |               | chr7 | - |
| ASHG19A3A033734 | 0.009049 | 0.125138 | 2.586257 | up | noncoding | AL162065        |               | chr7 | - |
| ASHG19A3A033734 | 0.009049 | 0.125138 | 2.586257 | up | noncoding | AL162065        |               | chr7 | - |
| ASHG19A3A033803 | 0.003237 | 0.08353  | 2.165363 | up | noncoding | uc003wmd.1      | AX747269      | chr7 | - |
| ASHG19A3A033813 | 0.002525 | 0.076115 | 4.649164 | up | noncoding | ENST00000430825 | AC005534.9    | chr7 | - |
| ASHG19A3A033813 | 0.002525 | 0.076115 | 4.649164 | up | noncoding | ENST00000430825 | AC005534.9    | chr7 | - |
| ASHG19A3A033813 | 0.002525 | 0.076115 | 4.649164 | up | noncoding | ENST00000430825 | AC005534.9    | chr7 | - |
| ASHG19A3A033815 | 0.001491 | 0.063791 | 3.088759 | up | noncoding | AY927465        |               | chr7 | - |
| ASHG19A3A033815 | 0.001491 | 0.063791 | 3.088759 | up | noncoding | AY927465        |               | chr7 | - |



|                 |          |          |          |    |           |                 |               |      |   |
|-----------------|----------|----------|----------|----|-----------|-----------------|---------------|------|---|
| ASHG19A3A033955 | 0.013734 | 0.14631  | 26.95785 | up | noncoding | ENST00000458624 | AC007009.1    | chr7 | + |
| ASHG19A3A033955 | 0.013734 | 0.14631  | 26.95785 | up | noncoding | ENST00000458624 | AC007009.1    | chr7 | + |
| ASHG19A3A033955 | 0.013734 | 0.14631  | 26.95785 | up | noncoding | ENST00000458624 | AC007009.1    | chr7 | + |
| ASHG19A3A033959 | 0.002633 | 0.07733  | 5.882902 | up | noncoding | ENST00000420684 | AC009500.2    | chr7 | + |
| ASHG19A3A033994 | 0.025882 | 0.193215 | 2.833175 | up | noncoding | ENST00000415878 | AC073629.2    | chr7 | + |
| ASHG19A3A033994 | 0.025882 | 0.193215 | 2.833175 | up | noncoding | ENST00000415878 | AC073629.2    | chr7 | + |
| ASHG19A3A034023 | 0.009004 | 0.124989 | 5.520487 | up | noncoding | ENST00000430859 | AC005083.1    | chr7 | + |
| ASHG19A3A034069 | 0.04246  | 0.238285 | 2.967043 | up | noncoding | BC047330        |               | chr7 | + |
| ASHG19A3A034130 | 0.0253   | 0.191812 | 2.014412 | up | noncoding | BC016002        |               | chr7 | + |
| ASHG19A3A034159 | 0.019726 | 0.172446 | 2.080663 | up | noncoding | ENST00000435239 | AC018641.6    | chr7 | + |
| ASHG19A3A034164 | 0.018424 | 0.166892 | 5.017831 | up | noncoding | uc003tcy.3      | AK057321      | chr7 | + |
| ASHG19A3A034165 | 0.014741 | 0.150708 | 3.592288 | up | noncoding | uc003tcz.1      | AK127989      | chr7 | + |
| ASHG19A3A034212 | 0.000551 | 0.046773 | 3.680598 | up | noncoding | ENST00000448974 | AC009196.2    | chr7 | + |
| ASHG19A3A034212 | 0.000551 | 0.046773 | 3.680598 | up | noncoding | ENST00000448974 | AC009196.2    | chr7 | + |
| ASHG19A3A034212 | 0.000551 | 0.046773 | 3.680598 | up | noncoding | ENST00000448974 | AC009196.2    | chr7 | + |
| ASHG19A3A034224 | 0.04515  | 0.243678 | 16.39649 | up | noncoding | ENST00000423953 | KRT8P20       | chr7 | + |
| ASHG19A3A034236 | 0.013257 | 0.145223 | 2.134628 | up | noncoding | ENST00000422100 | RP11-7G12.1   | chr1 | + |
| ASHG19A3A034421 | 0.009964 | 0.129916 | 2.665695 | up | noncoding | ENST00000429970 | RP5-965K10.3  | chr7 | + |
| ASHG19A3A034435 | 0.008599 | 0.122299 | 5.647383 | up | noncoding | ENST00000395413 | RP11-165H4.3  | chr7 | + |
| ASHG19A3A034470 | 0.023854 | 0.185695 | 2.169731 | up | noncoding | NR_003110       | CCT6P1        | chr7 | + |
| ASHG19A3A034568 | 0.033556 | 0.214768 | 2.595775 | up | noncoding | NR_033322       | NSUN5P1       | chr7 | + |
| ASHG19A3A034617 | 0.000316 | 0.039856 | 2.307488 | up | noncoding | ENST00000450028 | RPL13AP17     | chr7 | + |
| ASHG19A3A034671 | 0.002544 | 0.076252 | 14.81696 | up | noncoding | AL133090        |               | chr7 | + |
| ASHG19A3A034671 | 0.002544 | 0.076252 | 14.81696 | up | noncoding | AL133090        |               | chr7 | + |
| ASHG19A3A034671 | 0.002544 | 0.076252 | 14.81696 | up | noncoding | AL133090        |               | chr7 | + |
| ASHG19A3A034745 | 0.025153 | 0.19124  | 2.014763 | up | noncoding | ENST00000441505 | AC007875.2    | chr7 | + |
| ASHG19A3A034842 | 0.001087 | 0.057512 | 14.18806 | up | noncoding | ENST00000419422 | RP11-132A1.4  | chr7 | + |
| ASHG19A3A034850 | 0.032866 | 0.213033 | 2.078208 | up | noncoding | ENST00000484974 | RP11-163E9.2  | chr7 | + |
| ASHG19A3A034900 | 0.008314 | 0.121096 | 2.189053 | up | noncoding | ENST00000433617 | AC005046.5    | chr7 | + |
| ASHG19A3A034914 | 0.041227 | 0.236689 | 2.347069 | up | noncoding | ENST00000491764 | RP1-81F6.2    | chr1 | + |
| ASHG19A3A034923 | 0.007344 | 0.114264 | 2.664959 | up | noncoding | ENST00000432581 | AC002463.2    | chr7 | + |
| ASHG19A3A034976 | 0.025609 | 0.192438 | 17.39509 | up | noncoding | uc003vkf.1      | AK057037      | chr7 | + |
| ASHG19A3A035008 | 0.004401 | 0.094564 | 4.819006 | up | noncoding | ENST00000453278 | RP11-807H17.1 | chr7 | + |

|                 |          |          |          |    |           |                 |               |      |   |
|-----------------|----------|----------|----------|----|-----------|-----------------|---------------|------|---|
| ASHG19A3A035027 | 0.008691 | 0.122758 | 3.119958 | up | noncoding | ENST00000478818 | EFCAB3        | chr7 | + |
| ASHG19A3A035033 | 0.01649  | 0.157948 | 2.491569 | up | noncoding | NR_024368       | FLJ45340      | chr7 | + |
| ASHG19A3A035058 | 0.000201 | 0.034555 | 12.2169  | up | noncoding | uc003voy.2      | BC035417      | chr7 | + |
| ASHG19A3A035093 | 0.006399 | 0.109654 | 3.965046 | up | noncoding | uc003vrd.1      | AK097607      | chr7 | + |
| ASHG19A3A035226 | 0.0035   | 0.085616 | 2.635487 | up | noncoding | G30863          |               | chr7 | + |
| ASHG19A3A035261 | 0.008884 | 0.124348 | 14.64937 | up | noncoding | ENST00000479102 | OR2A9P        | chr7 | + |
| ASHG19A3A035309 | 0.005929 | 0.105251 | 7.596927 | up | noncoding | AL359058        |               | chr7 | + |
| ASHG19A3A035363 | 0.038245 | 0.229396 | 3.114943 | up | noncoding | ENST00000477993 | FABP5L3       | chr7 | + |
| ASHG19A3A035366 | 0.041875 | 0.238139 | 3.549907 | up | noncoding | NR_027387       | LOC100128822  | chr7 | + |
| ASHG19A3A035379 | 0.034754 | 0.219251 | 2.180519 | up | noncoding | NR_028090       | LOC202781     | chr7 | + |
| ASHG19A3A035407 | 1.77E-05 | 0.014741 | 28.36524 | up | noncoding | uc003wne.1      | LOC645249     | chr7 | + |
| ASHG19A3A035408 | 0.000122 | 0.031585 | 20.38934 | up | noncoding | BC094870        |               | chr7 | + |
| ASHG19A3A035430 | 0.002893 | 0.081533 | 3.04114  | up | noncoding | ENST00000457337 | AC019084.7    | chr7 | + |
| ASHG19A3A035579 | 0.011723 | 0.138492 | 3.68705  | up | noncoding | ENST00000465586 | AC100802.2    | chr8 | - |
| ASHG19A3A035619 | 0.034142 | 0.216634 | 2.349771 | up | noncoding | ENST00000493797 | RP11-34P13.14 | chr1 | - |
| ASHG19A3A035667 | 0.00172  | 0.067108 | 3.75252  | up | noncoding | ENST00000509266 | AC026979.1    | chr8 | - |
| ASHG19A3A035683 | 0.006138 | 0.107564 | 2.968259 | up | noncoding | ENST00000468780 | RP1-155O2.1   | chr8 | - |
| ASHG19A3A035777 | 0.001771 | 0.067459 | 2.348463 | up | noncoding | BC030747        |               | chr8 | - |
| ASHG19A3A035832 | 1.86E-05 | 0.014741 | 3.069549 | up | noncoding | NR_002599       | SNHG6         | chr8 | - |
| ASHG19A3A035833 | 0.00969  | 0.128705 | 4.849506 | up | noncoding | ENST00000502076 | SNHG6         | chr8 | - |
| ASHG19A3A035876 | 0.033559 | 0.214768 | 2.155822 | up | noncoding | AK123531        |               | chr8 | - |
| ASHG19A3A035881 | 0.002863 | 0.081298 | 13.51727 | up | noncoding | uc003yao.3      | BC062758      | chr8 | - |
| ASHG19A3A035898 | 0.016769 | 0.159743 | 56.45736 | up | noncoding | BC004287        |               | chr8 | - |
| ASHG19A3A035911 | 0.000535 | 0.04646  | 4.048334 | up | noncoding | ENST00000507690 | AC132219.1    | chr8 | - |
| ASHG19A3A035912 | 0.000893 | 0.054744 | 2.808063 | up | noncoding | NR_033194       | ZFAND1        | chr8 | - |
| ASHG19A3A035912 | 0.000893 | 0.054744 | 2.808063 | up | noncoding | NR_033194       | ZFAND1        | chr8 | - |
| ASHG19A3A035912 | 0.000893 | 0.054744 | 2.808063 | up | noncoding | NR_033194       | ZFAND1        | chr8 | - |
| ASHG19A3A036002 | 0.023587 | 0.185283 | 2.134842 | up | noncoding | ENST00000461683 | KB-1434A12.1  | chr8 | - |
| ASHG19A3A036010 | 0.03915  | 0.230766 | 2.5494   | up | noncoding | BC045564        |               | chr8 | - |
| ASHG19A3A036127 | 0.006587 | 0.111033 | 12.85072 | up | noncoding | uc003ysa.1      | AK125310      | chr8 | - |
| ASHG19A3A036131 | 0.00937  | 0.126554 | 3.836727 | up | noncoding | uc003ysg.2      | BC042052      | chr8 | - |
| ASHG19A3A036148 | 0.01108  | 0.135071 | 2.136444 | up | noncoding | NR_026684       | HPYR1         | chr8 | - |
| ASHG19A3A036166 | 0.000341 | 0.041094 | 2.11286  | up | noncoding | AK127771        |               | chr8 | - |

|                 |          |          |          |    |           |                 |                |      |   |
|-----------------|----------|----------|----------|----|-----------|-----------------|----------------|------|---|
| ASHG19A3A036214 | 0.000432 | 0.044424 | 11.15122 | up | noncoding | NR_026785       | C8orf51        | chr8 | - |
| ASHG19A3A036327 | 0.01302  | 0.143896 | 4.781045 | up | noncoding | uc003wsp.1      | BC017578       | chr8 | + |
| ASHG19A3A036446 | 0.003777 | 0.088847 | 5.789102 | up | noncoding | uc003xdb.1      | AK124295       | chr8 | + |
| ASHG19A3A036488 | 0.021017 | 0.176175 | 9.479265 | up | noncoding | BC042009        |                | chr8 | + |
| ASHG19A3A036488 | 0.021017 | 0.176175 | 9.479265 | up | noncoding | BC042009        |                | chr8 | + |
| ASHG19A3A036583 | 0.001592 | 0.065335 | 3.9377   | up | noncoding | ENST00000511103 | RP11-790L1.1   | chr8 | + |
| ASHG19A3A036696 | 0.001367 | 0.062419 | 3.878051 | up | noncoding | ENST00000479876 | RP11-6I2.1     | chr8 | + |
| ASHG19A3A036847 | 0.000739 | 0.051923 | 2.045341 | up | noncoding | AF209975        |                | chr8 | + |
| ASHG19A3A036847 | 0.000739 | 0.051923 | 2.045341 | up | noncoding | AF209975        |                | chr8 | + |
| ASHG19A3A036889 | 0.013772 | 0.146386 | 2.91972  | up | noncoding | ENST00000434983 | RP11-309H21.2  | chr1 | + |
| ASHG19A3A036926 | 0.048275 | 0.250288 | 3.617507 | up | noncoding | ENST00000512617 | PVT1           | chr8 | + |
| ASHG19A3A037010 | 0.018296 | 0.166717 | 2.087028 | up | noncoding | NR_024207       | KIAA1875       | chr8 | + |
| ASHG19A3A037085 | 0.001231 | 0.061392 | 2.047681 | up | noncoding | ENST00000422953 | RP11-39K24.9   | chr9 | - |
| ASHG19A3A037234 | 0.021331 | 0.177265 | 2.006921 | up | noncoding | ENST00000422717 | RP11-550E18.1  | chr9 | - |
| ASHG19A3A037247 | 0.02546  | 0.192173 | 2.521699 | up | noncoding | ENST00000418613 | RP11-448G4.3   | chr1 | + |
| ASHG19A3A037247 | 0.02546  | 0.192173 | 2.521699 | up | noncoding | ENST00000418613 | RP11-448G4.3   | chr1 | + |
| ASHG19A3A037260 | 0.003529 | 0.086049 | 3.388987 | up | noncoding | ENST00000434350 | RP11-255A11.4  | chr9 | - |
| ASHG19A3A037327 | 0.007162 | 0.113829 | 2.244822 | up | noncoding | ENST00000320491 | RP11-113A10.1  | chr9 | - |
| ASHG19A3A037364 | 0.004935 | 0.098435 | 12.60141 | up | noncoding | ENST00000504791 | RP11-392E22.5  | chr9 | - |
| ASHG19A3A037402 | 0.032658 | 0.212612 | 4.022986 | up | noncoding | ENST00000450520 | RP11-216M21.7  | chr9 | - |
| ASHG19A3A037409 | 0.006731 | 0.112118 | 14.26918 | up | noncoding | uc004acs.2      | DQ587119       | chr9 | - |
| ASHG19A3A037410 | 0.013919 | 0.146871 | 8.518988 | up | noncoding | NR_026759       | FAM95B1        | chr9 | - |
| ASHG19A3A037466 | 0.046869 | 0.248431 | 2.482877 | up | noncoding | ENST00000430302 | RP11-111F5.4   | chr9 | - |
| ASHG19A3A037492 | 0.04922  | 0.252187 | 2.509884 | up | noncoding | uc004aen.1      | AQP7P1         | chr9 | - |
| ASHG19A3A037588 | 0.024029 | 0.186338 | 2.526069 | up | noncoding | NR_023352       | C9orf95        | chr9 | - |
| ASHG19A3A037588 | 0.024029 | 0.186338 | 2.526069 | up | noncoding | NR_023352       | C9orf95        | chr9 | - |
| ASHG19A3A037588 | 0.024029 | 0.186338 | 2.526069 | up | noncoding | NR_023352       | C9orf95        | chr9 | - |
| ASHG19A3A037655 | 0.012776 | 0.143078 | 4.283471 | up | noncoding | ENST00000434455 | RP11-276H19.2  | chr9 | - |
| ASHG19A3A037679 | 0.000202 | 0.034555 | 2.12243  | up | noncoding | ENST00000449990 | RP11-555F9.2   | chr9 | - |
| ASHG19A3A037695 | 0.017883 | 0.165587 | 3.751038 | up | noncoding | ENST00000415471 | RP11-100G15.10 | chr9 | - |
| ASHG19A3A037743 | 0.000656 | 0.050176 | 10.13241 | up | noncoding | ENST00000433644 | RP11-435O5.2   | chr9 | - |
| ASHG19A3A037744 | 0.012708 | 0.142757 | 3.044798 | up | noncoding | uc009wzz.1      | AK055590       | chr1 | + |
| ASHG19A3A037809 | 0.030831 | 0.20838  | 4.410123 | up | noncoding | uc004baj.3      | BC030123       | chr9 | - |

|                 |          |          |          |    |           |                 |                 |      |   |
|-----------------|----------|----------|----------|----|-----------|-----------------|-----------------|------|---|
| ASHG19A3A037818 | 0.006859 | 0.112461 | 4.56094  | up | noncoding | BC015133        |                 | chr9 | - |
| ASHG19A3A037855 | 0.032496 | 0.212294 | 2.53155  | up | noncoding | ENST00000418656 | RP11-508N12.2   | chr9 | - |
| ASHG19A3A037864 | 0.022376 | 0.181953 | 3.04228  | up | noncoding | ENST00000435770 | RPL36AP6        | chr9 | - |
| ASHG19A3A037881 | 0.049111 | 0.25214  | 2.754441 | up | noncoding | NR_026918       | PTPN3           | chr9 | - |
| ASHG19A3A037881 | 0.049111 | 0.25214  | 2.754441 | up | noncoding | NR_026918       | PTPN3           | chr9 | - |
| ASHG19A3A037881 | 0.049111 | 0.25214  | 2.754441 | up | noncoding | NR_026918       | PTPN3           | chr9 | - |
| ASHG19A3A037881 | 0.049111 | 0.25214  | 2.754441 | up | noncoding | NR_026918       | PTPN3           | chr9 | - |
| ASHG19A3A037881 | 0.049111 | 0.25214  | 2.754441 | up | noncoding | NR_026918       | PTPN3           | chr9 | - |
| ASHG19A3A037881 | 0.049111 | 0.25214  | 2.754441 | up | noncoding | NR_026918       | PTPN3           | chr9 | - |
| ASHG19A3A037894 | 0.017825 | 0.165357 | 2.814608 | up | noncoding | ENST00000446460 | RP13-461N9.2    | chr9 | - |
| ASHG19A3A037894 | 0.017825 | 0.165357 | 2.814608 | up | noncoding | ENST00000446460 | RP13-461N9.2    | chr9 | - |
| ASHG19A3A037894 | 0.017825 | 0.165357 | 2.814608 | up | noncoding | ENST00000446460 | RP13-461N9.2    | chr9 | - |
| ASHG19A3A037974 | 0.004316 | 0.093534 | 2.554086 | up | noncoding | ENST00000490225 | PTPRV           | chr1 | + |
| ASHG19A3A038016 | 0.022632 | 0.182257 | 4.046111 | up | noncoding | NR_026677       | C9orf45         | chr9 | - |
| ASHG19A3A038027 | 0.002283 | 0.074504 | 10.4577  | up | noncoding | BC027988        |                 | chr9 | - |
| ASHG19A3A038052 | 0.025538 | 0.192321 | 2.086111 | up | noncoding | AK124330        |                 | chr9 | - |
| ASHG19A3A038100 | 0.001653 | 0.066029 | 4.165596 | up | noncoding | BX648304        |                 | chr9 | - |
| ASHG19A3A038100 | 0.001653 | 0.066029 | 4.165596 | up | noncoding | BX648304        |                 | chr9 | - |
| ASHG19A3A038100 | 0.001653 | 0.066029 | 4.165596 | up | noncoding | BX648304        |                 | chr9 | - |
| ASHG19A3A038195 | 0.010487 | 0.132357 | 3.550706 | up | noncoding | AK094119        |                 | chr9 | - |
| ASHG19A3A038233 | 0.00088  | 0.054542 | 2.881432 | up | noncoding | CR599011        |                 | chr9 | - |
| ASHG19A3A038288 | 0.045461 | 0.244109 | 2.867902 | up | noncoding | ENST00000421620 | XXYac-YRM2039.1 | chr9 | + |
| ASHG19A3A038293 | 0.001676 | 0.066297 | 3.649672 | up | noncoding | ENST00000455592 | RP11-165F24.2   | chr9 | + |
| ASHG19A3A038314 | 0.000444 | 0.044913 | 2.5956   | up | noncoding | ENST00000422150 | RP11-252M18.3   | chr9 | + |
| ASHG19A3A038314 | 0.000444 | 0.044913 | 2.5956   | up | noncoding | ENST00000422150 | RP11-252M18.3   | chr9 | + |
| ASHG19A3A038487 | 0.00037  | 0.042176 | 4.287206 | up | noncoding | ENST00000433357 | RP11-255A11.21  | chr9 | + |
| ASHG19A3A038537 | 0.008527 | 0.122132 | 33.82339 | up | noncoding | ENST00000431981 | RP11-112J3.16   | chr9 | + |
| ASHG19A3A038578 | 0.002375 | 0.074687 | 2.724184 | up | noncoding | AK057054        |                 | chr9 | + |
| ASHG19A3A038585 | 0.000171 | 0.033859 | 12.91731 | up | noncoding | NR_027294       | C9orf122        | chr9 | + |
| ASHG19A3A038616 | 0.004796 | 0.097218 | 4.204895 | up | noncoding | uc004acg.2      | FAM95B1         | chr9 | + |
| ASHG19A3A038625 | 0.010629 | 0.13248  | 2.861696 | up | noncoding | ENST00000455231 | AC129778.6      | chr9 | + |
| ASHG19A3A038626 | 0.020324 | 0.174085 | 2.025921 | up | noncoding | ENST00000416720 | AC129778.3      | chr9 | + |
| ASHG19A3A038649 | 0.025212 | 0.191438 | 2.153312 | up | noncoding | ENST00000411931 | RP11-160N1.1    | chr9 | + |

|                 |          |          |          |    |           |                 |                |      |   |
|-----------------|----------|----------|----------|----|-----------|-----------------|----------------|------|---|
| ASHG19A3A038655 | 0.018806 | 0.168175 | 5.146408 | up | noncoding | uc004adi.3      | FAM27E3        | chr9 | + |
| ASHG19A3A038664 | 0.04309  | 0.238904 | 2.021227 | up | noncoding | NR_024060       | FAM27A         | chr9 | + |
| ASHG19A3A038797 | 0.036077 | 0.223195 | 4.382804 | up | noncoding | AK023096        |                | chr9 | + |
| ASHG19A3A038797 | 0.036077 | 0.223195 | 4.382804 | up | noncoding | AK023096        |                | chr9 | + |
| ASHG19A3A038834 | 0.040235 | 0.234326 | 2.06004  | up | noncoding | uc004amd.2      | BC036431       | chr9 | + |
| ASHG19A3A038970 | 0.024305 | 0.187294 | 2.279895 | up | noncoding | uc004auu.2      | CR593779       | chr9 | + |
| ASHG19A3A038985 | 0.004992 | 0.098523 | 2.046157 | up | noncoding | ENST00000432132 | RP11-569G13.1  | chr9 | + |
| ASHG19A3A039091 | 0.047478 | 0.249063 | 2.202209 | up | noncoding | ENST00000394891 | RP11-240E2.2   | chr9 | + |
| ASHG19A3A039292 | 0.013641 | 0.145926 | 2.687054 | up | noncoding | NR_026817       | LOC148696      | chr1 | + |
| ASHG19A3A039321 | 0.024658 | 0.188902 | 2.647961 | up | noncoding | uc004bxu.2      | BC094873       | chr9 | + |
| ASHG19A3A039342 | 0.007028 | 0.113157 | 2.02887  | up | noncoding | ENST00000423330 | RP11-57C19.2   | chr9 | + |
| ASHG19A3A039369 | 0.001858 | 0.068734 | 2.577986 | up | noncoding | BX537622        |                | chr9 | + |
| ASHG19A3A039481 | 0.002094 | 0.072143 | 2.717841 | up | noncoding | ENST00000456356 | RP11-229P13.23 | chr9 | + |
| ASHG19A3A039548 | 0.045027 | 0.243678 | 2.112689 | up | noncoding | ENST00000456563 | RP11-706O15.3  | chrX | - |
| ASHG19A3A039551 | 0.01312  | 0.144357 | 2.582488 | up | noncoding | ENST00000381105 | RP11-706O15.7  | chrX | - |
| ASHG19A3A039555 | 0.001567 | 0.065335 | 2.536702 | up | noncoding | ENST00000422914 | RP11-733O18.1  | chrX | - |
| ASHG19A3A039560 | 0.000312 | 0.039856 | 2.019186 | up | noncoding | ENST00000437297 | RP11-459A10.1  | chrX | - |
| ASHG19A3A039561 | 0.003943 | 0.089575 | 3.046605 | up | noncoding | BC071808        |                | chr1 | + |
| ASHG19A3A039576 | 0.002851 | 0.0811   | 2.949524 | up | noncoding | ENST00000436419 | RP11-66N5.2    | chrX | - |
| ASHG19A3A039614 | 0.031078 | 0.208908 | 2.045708 | up | noncoding | ENST00000448018 | RP13-928P6.3   | chrX | - |
| ASHG19A3A039664 | 0.047616 | 0.249442 | 2.402598 | up | noncoding | ENST00000500992 | AL732366.3     | chrX | - |
| ASHG19A3A039668 | 0.003449 | 0.085066 | 3.609815 | up | noncoding | NR_023358       | SCARNA9L       | chrX | - |
| ASHG19A3A039690 | 0.027441 | 0.198139 | 2.027968 | up | noncoding | ENST00000496795 | RP11-298C3.2   | chrX | - |
| ASHG19A3A039733 | 0.017696 | 0.164768 | 2.137832 | up | noncoding | ENST00000455438 | RP11-87M18.2   | chrX | - |
| ASHG19A3A039778 | 0.013418 | 0.145745 | 2.317413 | up | noncoding | ENST00000448015 | RP11-460I13.2  | chr1 | - |
| ASHG19A3A039778 | 0.013418 | 0.145745 | 2.317413 | up | noncoding | ENST00000448015 | RP11-460I13.2  | chr1 | - |
| ASHG19A3A039778 | 0.013418 | 0.145745 | 2.317413 | up | noncoding | ENST00000448015 | RP11-460I13.2  | chr1 | - |
| ASHG19A3A039788 | 0.049907 | 0.252541 | 16.55874 | up | noncoding | ENST00000398010 | KRT8P14        | chrX | - |
| ASHG19A3A039792 | 0.007248 | 0.113881 | 3.376207 | up | noncoding | ENST00000456532 | RP5-1158E12.3  | chrX | - |
| ASHG19A3A039798 | 0.003858 | 0.089011 | 8.709258 | up | noncoding | uc004dgl.1      | BC015977       | chrX | - |
| ASHG19A3A040002 | 0.000566 | 0.047322 | 2.201694 | up | noncoding | ENST00000438308 | RP11-30M20.2   | chrX | - |
| ASHG19A3A040066 | 0.00373  | 0.088504 | 16.22666 | up | noncoding | NR_026594       | CXorf50B       | chrX | - |
| ASHG19A3A040082 | 0.000321 | 0.039856 | 2.041048 | up | noncoding | uc004ebq.1      | AK125301       | chrX | - |

|                 |          |          |          |    |           |                 |               |      |   |
|-----------------|----------|----------|----------|----|-----------|-----------------|---------------|------|---|
| ASHG19A3A040120 | 0.005611 | 0.1031   | 4.561561 | up | noncoding | ENST00000395439 | RP4-581F12.2  | chrX | - |
| ASHG19A3A040177 | 0.016209 | 0.156457 | 2.335425 | up | noncoding | uc004egm.2      | CR623706      | chrX | - |
| ASHG19A3A040183 | 0.00512  | 0.099876 | 2.418729 | up | noncoding | ENST00000416788 | RP11-410C4.1  | chr1 | + |
| ASHG19A3A040313 | 0.010339 | 0.131374 | 2.210358 | up | noncoding | ENST00000413074 | RP11-378J18.3 | chr1 | + |
| ASHG19A3A040313 | 0.010339 | 0.131374 | 2.210358 | up | noncoding | ENST00000413074 | RP11-378J18.3 | chr1 | + |
| ASHG19A3A040313 | 0.010339 | 0.131374 | 2.210358 | up | noncoding | ENST00000413074 | RP11-378J18.3 | chr1 | + |
| ASHG19A3A040340 | 0.047655 | 0.249532 | 3.685658 | up | noncoding | NR_027131       | CXorf42       | chrX | - |
| ASHG19A3A040361 | 0.027801 | 0.199208 | 2.369513 | up | noncoding | ENST00000426367 | RP1-315G1.3   | chrX | - |
| ASHG19A3A040361 | 0.027801 | 0.199208 | 2.369513 | up | noncoding | ENST00000426367 | RP1-315G1.3   | chrX | - |
| ASHG19A3A040361 | 0.027801 | 0.199208 | 2.369513 | up | noncoding | ENST00000426367 | RP1-315G1.3   | chrX | - |
| ASHG19A3A040361 | 0.027801 | 0.199208 | 2.369513 | up | noncoding | ENST00000426367 | RP1-315G1.3   | chrX | - |
| ASHG19A3A040404 | 0.000302 | 0.039771 | 4.401667 | up | noncoding | ENST00000394346 | RP11-512H23.2 | chrX | - |
| ASHG19A3A040406 | 0.003798 | 0.088847 | 2.641625 | up | noncoding | NR_026975       | LOC286467     | chrX | - |
| ASHG19A3A040476 | 0.00507  | 0.099406 | 2.439375 | up | noncoding | ENST00000419392 | RP11-51C14.2  | chrX | - |
| ASHG19A3A040661 | 0.025884 | 0.193215 | 3.474743 | up | noncoding | BC131500        |               | chrX | + |
| ASHG19A3A040661 | 0.025884 | 0.193215 | 3.474743 | up | noncoding | BC131500        |               | chrX | + |
| ASHG19A3A040661 | 0.025884 | 0.193215 | 3.474743 | up | noncoding | BC131500        |               | chrX | + |
| ASHG19A3A040661 | 0.025884 | 0.193215 | 3.474743 | up | noncoding | BC131500        |               | chrX | + |
| ASHG19A3A040802 | 0.015876 | 0.155353 | 2.109687 | up | noncoding | ENST00000378958 | CKS1BP6       | chrX | + |
| ASHG19A3A040881 | 0.000271 | 0.03723  | 2.553269 | up | noncoding | ENST00000443767 | RP5-1158H2.3  | chrX | + |
| ASHG19A3A040970 | 0.00311  | 0.082215 | 4.831091 | up | noncoding | ENST00000447187 | CTD-2090I13.3 | chr1 | + |
| ASHG19A3A041010 | 0.000199 | 0.034555 | 2.458684 | up | noncoding | NR_024485       | LOC100130093  | chr1 | + |
| ASHG19A3A041010 | 0.000199 | 0.034555 | 2.458684 | up | noncoding | NR_024485       | LOC100130093  | chr1 | + |
| ASHG19A3A041100 | 0.000511 | 0.045915 | 2.345229 | up | noncoding | NR_024127       | SNHG12        | chr1 | - |
| ASHG19A3A041235 | 0.01342  | 0.145745 | 2.970869 | up | noncoding | ENST00000431935 | RP11-325E14.1 | chrX | + |
| ASHG19A3A041284 | 0.001268 | 0.06217  | 3.539261 | up | noncoding | ENST00000414863 | RP11-29L10.1  | chrX | + |
| ASHG19A3A041291 | 0.039331 | 0.23138  | 2.382965 | up | noncoding | ENST00000414579 | RP3-347M6.2   | chrX | + |
| ASHG19A3A041417 | 0.000541 | 0.04646  | 3.46663  | up | noncoding | NR_033260       | LOC100329135  | chrX | + |
| ASHG19A3A041417 | 0.000541 | 0.04646  | 3.46663  | up | noncoding | NR_033260       | LOC100329135  | chrX | + |
| ASHG19A3A041417 | 0.000541 | 0.04646  | 3.46663  | up | noncoding | NR_033260       | LOC100329135  | chrX | + |
| ASHG19A3A041417 | 0.000541 | 0.04646  | 3.46663  | up | noncoding | NR_033260       | LOC100329135  | chrX | + |
| ASHG19A3A041480 | 0.00651  | 0.110473 | 2.676565 | up | noncoding | ENST00000436852 | RP11-229N15.1 | chrX | + |
| ASHG19A3A041534 | 0.037353 | 0.226944 | 2.095977 | up | noncoding | ENST00000405943 | RP4-765F13.3  | chrX | + |

|                 |          |          |          |    |           |                 |               |       |   |
|-----------------|----------|----------|----------|----|-----------|-----------------|---------------|-------|---|
| ASHG19A3A041628 | 1.75E-05 | 0.014741 | 3.978469 | up | noncoding | ENST00000399253 | RP3-507I15.1  | chrX  | + |
| ASHG19A3A041704 | 0.039892 | 0.233399 | 16.01032 | up | noncoding | ENST00000434750 | AC108171.5    | chrX  | + |
| ASHG19A3A041900 | 0.031213 | 0.208947 | 2.285288 | up | noncoding | NR_028083       | FAM41AY1      | chrY  | - |
| ASHG19A3A042047 | 0.02957  | 0.204659 | 2.92198  | up | noncoding | ENST00000454315 | AC025731.3    | chrY  | + |
| ASHG19A3A042164 | 0.007362 | 0.114264 | 2.18947  | up | noncoding | ENST00000449148 | OFD1P8        | chrY  | + |
| ASHG19A3A042255 | 0.002826 | 0.080918 | 2.474113 | up | noncoding | ENST00000427498 | RP11-513D4.2  | chr1  | + |
| ASHG19A3A042255 | 0.002826 | 0.080918 | 2.474113 | up | noncoding | ENST00000427498 | RP11-513D4.2  | chr1  | + |
| ASHG19A3A042255 | 0.002826 | 0.080918 | 2.474113 | up | noncoding | ENST00000427498 | RP11-513D4.2  | chr1  | + |
| ASHG19A3A042353 | 0.033276 | 0.21454  | 2.142088 | up | noncoding | ENST00000438372 | RP11-69C17.1  | chr10 | - |
| ASHG19A3A042396 | 0.01821  | 0.166564 | 2.16697  | up | noncoding | ENST00000401075 | RP11-439L8.2  | chr1  | - |
| ASHG19A3A042399 | 0.022267 | 0.181462 | 2.151337 | up | noncoding | NR_033494       | IL15RA        | chr10 | - |
| ASHG19A3A042399 | 0.022267 | 0.181462 | 2.151337 | up | noncoding | NR_033494       | IL15RA        | chr10 | - |
| ASHG19A3A042401 | 0.04394  | 0.241054 | 2.434182 | up | noncoding | ENST00000397237 | RP11-414H17.2 | chr10 | - |
| ASHG19A3A042424 | 0.038488 | 0.229658 | 21.20405 | up | noncoding | ENST00000451609 | RP11-543F8.1  | chr10 | - |
| ASHG19A3A042433 | 0.010175 | 0.13072  | 3.3698   | up | noncoding | BC035155        |               | chr10 | - |
| ASHG19A3A042435 | 0.018678 | 0.16763  | 2.092216 | up | noncoding | ENST00000437825 | RP1-251M9.3   | chr10 | - |
| ASHG19A3A042439 | 0.015162 | 0.152727 | 2.614503 | up | noncoding | ENST00000500991 | AC026887.1    | chr10 | - |
| ASHG19A3A042439 | 0.015162 | 0.152727 | 2.614503 | up | noncoding | ENST00000500991 | AC026887.1    | chr10 | - |
| ASHG19A3A042439 | 0.015162 | 0.152727 | 2.614503 | up | noncoding | ENST00000500991 | AC026887.1    | chr10 | - |
| ASHG19A3A042439 | 0.015162 | 0.152727 | 2.614503 | up | noncoding | ENST00000500991 | AC026887.1    | chr10 | - |
| ASHG19A3A042544 | 0.034698 | 0.219148 | 2.183689 | up | noncoding | NR_026795       | NCRNA00202    | chr10 | - |
| ASHG19A3A042687 | 0.000996 | 0.057323 | 2.186894 | up | noncoding | uc001jbk.1      | AK056518      | chr10 | - |
| ASHG19A3A042687 | 0.000996 | 0.057323 | 2.186894 | up | noncoding | uc001jbk.1      | AK056518      | chr10 | - |
| ASHG19A3A042752 | 0.040895 | 0.235869 | 2.0635   | up | noncoding | uc009xny.1      | AK309922      | chr10 | - |
| ASHG19A3A042759 | 0.033542 | 0.214768 | 2.180059 | up | noncoding | ENST00000440750 | RP11-534L6.2  | chr10 | - |
| ASHG19A3A042866 | 0.011749 | 0.138503 | 2.276051 | up | noncoding | ENST00000412976 | RP11-386C23.1 | chr10 | - |
| ASHG19A3A042901 | 0.008996 | 0.124986 | 7.941494 | up | noncoding | ENST00000425216 | RP11-343J3.6  | chr10 | - |
| ASHG19A3A042964 | 0.043536 | 0.240172 | 2.781335 | up | noncoding | CR590180        |               | chr10 | - |
| ASHG19A3A042964 | 0.043536 | 0.240172 | 2.781335 | up | noncoding | CR590180        |               | chr10 | - |
| ASHG19A3A043128 | 0.000744 | 0.051923 | 4.324246 | up | noncoding | ENST00000419353 | RP11-429H9.4  | chr10 | - |
| ASHG19A3A043128 | 0.000744 | 0.051923 | 4.324246 | up | noncoding | ENST00000419353 | RP11-429H9.4  | chr10 | - |
| ASHG19A3A043152 | 0.002888 | 0.081533 | 2.228799 | up | noncoding | BC031678        |               | chr10 | - |
| ASHG19A3A043154 | 0.028336 | 0.200961 | 2.938027 | up | noncoding | ENST00000429734 | RP11-44D15.3  | chr10 | - |

|                 |          |          |          |    |           |                 |               |       |   |
|-----------------|----------|----------|----------|----|-----------|-----------------|---------------|-------|---|
| ASHG19A3A043157 | 0.023525 | 0.185273 | 2.033444 | up | noncoding | uc010ohs.1      | GJB3          | chr1  | - |
| ASHG19A3A043157 | 0.023525 | 0.185273 | 2.033444 | up | noncoding | uc010ohs.1      | GJB3          | chr1  | - |
| ASHG19A3A043334 | 0.0092   | 0.125952 | 8.508284 | up | noncoding | uc001lcv.1      | DQ596646      | chr10 | - |
| ASHG19A3A043335 | 0.021895 | 0.179301 | 3.660447 | up | noncoding | ENST00000453491 | RP11-539I5.1  | chr10 | - |
| ASHG19A3A043375 | 0.024776 | 0.189469 | 2.254612 | up | noncoding | ENST00000433839 | RP11-159H3.1  | chr10 | - |
| ASHG19A3A043456 | 0.025476 | 0.192173 | 2.703389 | up | noncoding | ENST00000414106 | RP11-140A10.3 | chr10 | - |
| ASHG19A3A043569 | 0.002257 | 0.074362 | 17.23903 | up | noncoding | uc001ijl.2      | AY007155      | chr10 | + |
| ASHG19A3A043570 | 0.005466 | 0.102582 | 5.294116 | up | noncoding | AF088007        |               | chr10 | + |
| ASHG19A3A043632 | 0.019872 | 0.17297  | 2.148154 | up | noncoding | ENST00000440878 | RP11-295P9.3  | chr10 | + |
| ASHG19A3A043676 | 0.0098   | 0.129114 | 2.419537 | up | noncoding | ENST00000419987 | RP11-188P8.2  | chr10 | + |
| ASHG19A3A043688 | 0.000538 | 0.04646  | 2.571726 | up | noncoding | ENST00000457930 | RP11-565H13.3 | chr10 | + |
| ASHG19A3A043755 | 0.023709 | 0.185644 | 2.211374 | up | noncoding | ENST00000497342 | RP11-192N10.2 | chr10 | + |
| ASHG19A3A043831 | 0.022695 | 0.182469 | 2.874379 | up | noncoding | ENST00000432557 | RP11-291L22.4 | chr10 | + |
| ASHG19A3A043835 | 0.002476 | 0.075264 | 2.457777 | up | noncoding | ENST00000423877 | RP11-453N3.2  | chr10 | + |
| ASHG19A3A043900 | 0.035994 | 0.223195 | 2.581809 | up | noncoding | ENST00000399377 | FAM25HP       | chr10 | + |
| ASHG19A3A044109 | 0.003338 | 0.084755 | 2.467923 | up | noncoding | uc001jtu.1      | BC033983      | chr10 | + |
| ASHG19A3A044109 | 0.003338 | 0.084755 | 2.467923 | up | noncoding | uc001jtu.1      | BC033983      | chr10 | + |
| ASHG19A3A044144 | 0.001319 | 0.06217  | 2.94694  | up | noncoding | BC040978        |               | chr10 | + |
| ASHG19A3A044144 | 0.001319 | 0.06217  | 2.94694  | up | noncoding | BC040978        |               | chr10 | + |
| ASHG19A3A044144 | 0.001319 | 0.06217  | 2.94694  | up | noncoding | BC040978        |               | chr10 | + |
| ASHG19A3A044144 | 0.001319 | 0.06217  | 2.94694  | up | noncoding | BC040978        |               | chr10 | + |
| ASHG19A3A044385 | 0.006735 | 0.112118 | 8.644303 | up | noncoding | ENST00000454935 | C10orf75      | chr10 | + |
| ASHG19A3A044415 | 0.004272 | 0.092902 | 14.0006  | up | noncoding | ENST00000448759 | RP11-342M1.7  | chr1  | - |
| ASHG19A3A044425 | 0.00144  | 0.062929 | 3.095726 | up | noncoding | uc001kvq.1      | AL050035      | chr10 | + |
| ASHG19A3A044455 | 0.016545 | 0.15827  | 7.158304 | up | noncoding | uc001kyd.1      | AK094859      | chr10 | + |
| ASHG19A3A044475 | 7.05E-06 | 0.011766 | 2.434299 | up | noncoding | AF086000        |               | chr10 | + |
| ASHG19A3A044475 | 7.05E-06 | 0.011766 | 2.434299 | up | noncoding | AF086000        |               | chr10 | + |
| ASHG19A3A044525 | 0.01825  | 0.166625 | 3.03582  | up | noncoding | ENST00000400856 | RP11-106M7.2  | chr10 | + |
| ASHG19A3A044556 | 0.017054 | 0.161291 | 2.716348 | up | noncoding | NR_026941       | CASC2         | chr10 | + |
| ASHG19A3A044597 | 0.000702 | 0.05142  | 2.268857 | up | noncoding | ENST00000442754 | RP5-891H21.1  | chr1  | - |
| ASHG19A3A044786 | 0.031559 | 0.209725 | 2.561873 | up | noncoding | uc001lxx.2      | znfp104       | chr11 | - |
| ASHG19A3A044856 | 0.004389 | 0.094444 | 2.109275 | up | noncoding | ENST00000435078 | OR52T1P       | chr11 | - |
| ASHG19A3A044929 | 0.02816  | 0.200153 | 2.400735 | up | noncoding | BC036621        |               | chr11 | - |





|                 |          |          |          |    |           |                 |               |       |   |
|-----------------|----------|----------|----------|----|-----------|-----------------|---------------|-------|---|
| ASHG19A3A045925 | 0.010605 | 0.13248  | 6.803083 | up | noncoding | uc001lpy.2      | AX748330      | chr11 | + |
| ASHG19A3A045951 | 0.010772 | 0.133412 | 2.023383 | up | noncoding | uc001lsz.2      | MUC5AC        | chr11 | + |
| ASHG19A3A046014 | 0.007981 | 0.118895 | 2.530968 | up | noncoding | AK024684        |               | chr1  | - |
| ASHG19A3A046172 | 0.019914 | 0.173018 | 3.165377 | up | noncoding | ENST00000363013 | AC127033.1    | chr11 | + |
| ASHG19A3A046289 | 0.006501 | 0.110473 | 5.981735 | up | noncoding | ENST00000489849 | RP11-124G5.1  | chr11 | + |
| ASHG19A3A046290 | 0.01417  | 0.147861 | 3.045381 | up | noncoding | NR_024625       | API5          | chr11 | + |
| ASHG19A3A046290 | 0.01417  | 0.147861 | 3.045381 | up | noncoding | NR_024625       | API5          | chr11 | + |
| ASHG19A3A046290 | 0.01417  | 0.147861 | 3.045381 | up | noncoding | NR_024625       | API5          | chr11 | + |
| ASHG19A3A046314 | 0.011134 | 0.135071 | 2.442152 | up | noncoding | ENST00000421838 | RP11-377K22.3 | chr1  | - |
| ASHG19A3A046346 | 0.009701 | 0.128705 | 2.084296 | up | noncoding | AK128134        |               | chr11 | + |
| ASHG19A3A046346 | 0.009701 | 0.128705 | 2.084296 | up | noncoding | AK128134        |               | chr11 | + |
| ASHG19A3A046433 | 0.000864 | 0.054271 | 2.614835 | up | noncoding | ENST00000359225 | AP000445.1    | chr11 | + |
| ASHG19A3A046533 | 0.001132 | 0.058346 | 2.480513 | up | noncoding | ENST00000443012 | RP4-782L23.2  | chr1  | - |
| ASHG19A3A046533 | 0.001132 | 0.058346 | 2.480513 | up | noncoding | ENST00000443012 | RP4-782L23.2  | chr1  | - |
| ASHG19A3A046655 | 0.002373 | 0.074687 | 2.568455 | up | noncoding | NR_024469       | LOC100130987  | chr11 | + |
| ASHG19A3A046655 | 0.002373 | 0.074687 | 2.568455 | up | noncoding | NR_024469       | LOC100130987  | chr11 | + |
| ASHG19A3A046655 | 0.002373 | 0.074687 | 2.568455 | up | noncoding | NR_024469       | LOC100130987  | chr11 | + |
| ASHG19A3A046736 | 0.004914 | 0.098355 | 2.090871 | up | noncoding | AK094727        |               | chr11 | + |
| ASHG19A3A046763 | 0.006965 | 0.113153 | 2.117568 | up | noncoding | uc010rrn.1      | DQ583960      | chr11 | + |
| ASHG19A3A046805 | 0.002017 | 0.070664 | 5.233741 | up | noncoding | ENST00000474462 | RP11-659G9.1  | chr11 | + |
| ASHG19A3A047067 | 0.011086 | 0.135071 | 2.062886 | up | noncoding | HIT000386803    |               | chr11 | + |
| ASHG19A3A047171 | 0.001959 | 0.070296 | 2.188959 | up | noncoding | NR_026823       | FAM138D       | chr12 | - |
| ASHG19A3A047216 | 0.016082 | 0.155694 | 2.284107 | up | noncoding | uc001qnj.1      | BC031884      | chr12 | - |
| ASHG19A3A047249 | 0.02242  | 0.182011 | 2.223483 | up | noncoding | uc001qrf.1      | AK097957      | chr12 | - |
| ASHG19A3A047349 | 0.00848  | 0.122132 | 4.541934 | up | noncoding | ENST00000464893 | RP11-59H1.1   | chr12 | - |
| ASHG19A3A047363 | 0.002256 | 0.074362 | 5.01023  | up | noncoding | ENST00000495304 | RP11-515B12.1 | chr12 | - |
| ASHG19A3A047439 | 0.024211 | 0.186855 | 2.037607 | up | noncoding | ENST00000500230 | AC009318.1    | chr12 | - |
| ASHG19A3A047448 | 2.8E-05  | 0.017174 | 5.636748 | up | noncoding | uc001rjq.1      | AK096360      | chr12 | - |
| ASHG19A3A047448 | 2.8E-05  | 0.017174 | 5.636748 | up | noncoding | uc001rjq.1      | AK096360      | chr12 | - |
| ASHG19A3A047448 | 2.8E-05  | 0.017174 | 5.636748 | up | noncoding | uc001rjq.1      | AK096360      | chr12 | - |
| ASHG19A3A047450 | 0.020427 | 0.174085 | 4.201434 | up | noncoding | uc001rjz.2      | DKFZp434C0631 | chr12 | - |
| ASHG19A3A047456 | 0.013378 | 0.145745 | 2.089748 | up | noncoding | ENST00000471002 | RP11-820K3.1  | chr12 | - |
| ASHG19A3A047470 | 0.047322 | 0.248703 | 5.356315 | up | noncoding | ENST00000439132 | RP11-548C21.1 | chr1  | - |

|                 |          |          |          |    |           |                 |               |       |   |
|-----------------|----------|----------|----------|----|-----------|-----------------|---------------|-------|---|
| ASHG19A3A047503 | 0.018238 | 0.166613 | 2.389696 | up | noncoding | ENST00000480555 | RP11-101K23.1 | chr12 | - |
| ASHG19A3A047685 | 0.02645  | 0.195017 | 4.671046 | up | noncoding | HIT000066907    |               | chr12 | - |
| ASHG19A3A047685 | 0.02645  | 0.195017 | 4.671046 | up | noncoding | HIT000066907    |               | chr12 | - |
| ASHG19A3A047761 | 0.006156 | 0.107612 | 2.832703 | up | noncoding | AK095383        |               | chr12 | - |
| ASHG19A3A047767 | 0.026986 | 0.196393 | 3.113246 | up | noncoding | ENST00000481157 | RP11-766N7.1  | chr12 | - |
| ASHG19A3A047769 | 0.043782 | 0.240512 | 3.695855 | up | noncoding | ENST00000399791 | AC079948.1    | chr12 | - |
| ASHG19A3A047769 | 0.043782 | 0.240512 | 3.695855 | up | noncoding | ENST00000399791 | AC079948.1    | chr12 | - |
| ASHG19A3A047769 | 0.043782 | 0.240512 | 3.695855 | up | noncoding | ENST00000399791 | AC079948.1    | chr12 | - |
| ASHG19A3A047769 | 0.043782 | 0.240512 | 3.695855 | up | noncoding | ENST00000399791 | AC079948.1    | chr12 | - |
| ASHG19A3A047770 | 0.00182  | 0.067812 | 6.831516 | up | noncoding | uc010ssu.1      | BC043551      | chr12 | - |
| ASHG19A3A048036 | 0.028178 | 0.200153 | 16.05126 | up | noncoding | uc001tvk.1      | AK096932      | chr12 | - |
| ASHG19A3A048040 | 0.005491 | 0.102653 | 2.023826 | up | noncoding | AL133652        |               | chr1  | - |
| ASHG19A3A048061 | 2.42E-05 | 0.016497 | 48.7793  | up | noncoding | NR_031766       | TESC          | chr12 | - |
| ASHG19A3A048061 | 2.42E-05 | 0.016497 | 48.7793  | up | noncoding | NR_031766       | TESC          | chr12 | - |
| ASHG19A3A048127 | 0.002839 | 0.080919 | 2.325549 | up | noncoding | AB209530        |               | chr12 | - |
| ASHG19A3A048337 | 0.033772 | 0.215485 | 2.549767 | up | noncoding | ENST00000433774 | RP5-837O21.6  | chr1  | - |
| ASHG19A3A048350 | 0.000234 | 0.035463 | 3.515557 | up | noncoding | NR_024374       | LOC642846     | chr12 | + |
| ASHG19A3A048379 | 0.012785 | 0.143078 | 2.589021 | up | noncoding | ENST00000358818 | AC007537.1    | chr12 | + |
| ASHG19A3A048512 | 0.048211 | 0.250288 | 2.430398 | up | noncoding | ENST00000442418 | RP11-86H7.1   | chr1  | - |
| ASHG19A3A048512 | 0.048211 | 0.250288 | 2.430398 | up | noncoding | ENST00000442418 | RP11-86H7.1   | chr1  | - |
| ASHG19A3A048538 | 0.049505 | 0.252234 | 2.16994  | up | noncoding | AK124266        |               | chr12 | + |
| ASHG19A3A048538 | 0.049505 | 0.252234 | 2.16994  | up | noncoding | AK124266        |               | chr12 | + |
| ASHG19A3A048667 | 0.0023   | 0.074504 | 2.311884 | up | noncoding | NR_026655       | FLJ12825      | chr12 | + |
| ASHG19A3A048706 | 0.018812 | 0.168175 | 2.707567 | up | noncoding | BC008292        |               | chr12 | + |
| ASHG19A3A048706 | 0.018812 | 0.168175 | 2.707567 | up | noncoding | BC008292        |               | chr12 | + |
| ASHG19A3A048761 | 0.012555 | 0.142131 | 2.231865 | up | noncoding | ENST00000480739 | RP11-571M6.1  | chr12 | + |
| ASHG19A3A048907 | 0.001243 | 0.061401 | 2.594591 | up | noncoding | HIT000242541    |               | chr12 | + |
| ASHG19A3A048907 | 0.001243 | 0.061401 | 2.594591 | up | noncoding | HIT000242541    |               | chr12 | + |
| ASHG19A3A049089 | 0.000613 | 0.049465 | 5.277038 | up | noncoding | BC053353        |               | chr1  | - |
| ASHG19A3A049183 | 0.009339 | 0.126454 | 3.080446 | up | noncoding | CR622106        |               | chr12 | + |
| ASHG19A3A049207 | 0.002448 | 0.075047 | 2.314787 | up | noncoding | ENST00000497352 | RP11-495K9.1  | chr12 | + |
| ASHG19A3A049214 | 0.027048 | 0.196393 | 2.583924 | up | noncoding | G65566          |               | chr12 | + |
| ASHG19A3A049218 | 0.032313 | 0.21224  | 2.428107 | up | noncoding | AK124307        |               | chr1  | - |

|                 |          |          |          |    |           |                 |               |       |   |
|-----------------|----------|----------|----------|----|-----------|-----------------|---------------|-------|---|
| ASHG19A3A049218 | 0.032313 | 0.21224  | 2.428107 | up | noncoding | AK124307        |               | chr1  | - |
| ASHG19A3A049218 | 0.032313 | 0.21224  | 2.428107 | up | noncoding | AK124307        |               | chr1  | - |
| ASHG19A3A049218 | 0.032313 | 0.21224  | 2.428107 | up | noncoding | AK124307        |               | chr1  | - |
| ASHG19A3A049275 | 0.043383 | 0.239621 | 3.021974 | up | noncoding | CR596712        |               | chr13 | - |
| ASHG19A3A049322 | 0.044939 | 0.243659 | 2.183193 | up | noncoding | ENST00000434100 | TPTE2P1       | chr13 | - |
| ASHG19A3A049346 | 0.015966 | 0.155608 | 4.733243 | up | noncoding | ENST00000444744 | RP11-428O18.4 | chr13 | - |
| ASHG19A3A049468 | 0.001035 | 0.057323 | 2.257695 | up | noncoding | ENST00000399049 | RP11-527F15.1 | chr13 | - |
| ASHG19A3A049493 | 0.016228 | 0.156468 | 2.140674 | up | noncoding | ENST00000419933 | OR7E36P       | chr13 | - |
| ASHG19A3A049548 | 0.00534  | 0.101513 | 4.250356 | up | noncoding | ENST00000474415 | RP11-305D15.6 | chr13 | - |
| ASHG19A3A049612 | 0.006969 | 0.113153 | 2.201997 | up | noncoding | ENST00000457065 | RP11-640E11.2 | chr13 | - |
| ASHG19A3A049617 | 0.017222 | 0.162064 | 2.276837 | up | noncoding | ENST00000398005 | RP11-334O13.1 | chr13 | - |
| ASHG19A3A049662 | 0.020298 | 0.174085 | 4.235261 | up | noncoding | ENST00000420287 | RP11-505F3.4  | chr13 | - |
| ASHG19A3A049669 | 0.021844 | 0.179084 | 2.393584 | up | noncoding | ENST00000451540 | RP11-159J2.1  | chr13 | - |
| ASHG19A3A049691 | 0.012668 | 0.142406 | 3.493464 | up | noncoding | AK021576        |               | chr13 | - |
| ASHG19A3A049801 | 0.017474 | 0.163413 | 3.041085 | up | noncoding | ENST00000397387 | RP11-190K16.2 | chr13 | - |
| ASHG19A3A049857 | 0.007988 | 0.118895 | 10.71649 | up | noncoding | ENST00000446789 | RP11-120K24.2 | chr13 | - |
| ASHG19A3A049902 | 0.030246 | 0.206387 | 2.101465 | up | noncoding | ENST00000438640 | RP11-76K19.5  | chr13 | + |
| ASHG19A3A049975 | 0.005129 | 0.099919 | 2.735941 | up | noncoding | ENST00000435725 | RP11-165I9.6  | chr13 | + |
| ASHG19A3A050160 | 0.023578 | 0.185283 | 2.454533 | up | noncoding | ENST00000432820 | RP11-214O11.1 | chr13 | + |
| ASHG19A3A050209 | 0.025808 | 0.193125 | 4.006735 | up | noncoding | ENST00000439042 | RP11-381L18.2 | chr13 | + |
| ASHG19A3A050209 | 0.025808 | 0.193125 | 4.006735 | up | noncoding | ENST00000439042 | RP11-381L18.2 | chr13 | + |
| ASHG19A3A050317 | 0.002345 | 0.074687 | 2.93327  | up | noncoding | AY927590        |               | chr13 | + |
| ASHG19A3A050378 | 0.000222 | 0.035463 | 14.56661 | up | noncoding | NR_027350       | MIR17HG       | chr13 | + |
| ASHG19A3A050430 | 0.001013 | 0.057323 | 2.085002 | up | noncoding | AK128004        |               | chr13 | + |
| ASHG19A3A050430 | 0.001013 | 0.057323 | 2.085002 | up | noncoding | AK128004        |               | chr13 | + |
| ASHG19A3A050501 | 3.48E-06 | 0.008708 | 8.752384 | up | noncoding | uc001vso.2      | BC035340      | chr13 | + |
| ASHG19A3A050582 | 0.002456 | 0.075121 | 2.174325 | up | noncoding | ENST00000303519 | OR4E1P        | chr14 | - |
| ASHG19A3A050599 | 0.004611 | 0.095927 | 2.729347 | up | noncoding | AK023121        |               | chr14 | - |
| ASHG19A3A050599 | 0.004611 | 0.095927 | 2.729347 | up | noncoding | AK023121        |               | chr14 | - |
| ASHG19A3A050599 | 0.004611 | 0.095927 | 2.729347 | up | noncoding | AK023121        |               | chr14 | - |
| ASHG19A3A050730 | 0.045889 | 0.245254 | 15.03206 | up | noncoding | ENST00000454391 | AL358913.1    | chr14 | - |
| ASHG19A3A050816 | 0.001489 | 0.063791 | 2.710407 | up | noncoding | NR_027123       | C14orf33      | chr14 | - |
| ASHG19A3A050816 | 0.001489 | 0.063791 | 2.710407 | up | noncoding | NR_027123       | C14orf33      | chr14 | - |

|                 |          |          |          |    |           |                 |               |       |   |
|-----------------|----------|----------|----------|----|-----------|-----------------|---------------|-------|---|
| ASHG19A3A050816 | 0.001489 | 0.063791 | 2.710407 | up | noncoding | NR_027123       | C14orf33      | chr14 | - |
| ASHG19A3A050816 | 0.001489 | 0.063791 | 2.710407 | up | noncoding | NR_027123       | C14orf33      | chr14 | - |
| ASHG19A3A050847 | 0.042512 | 0.238285 | 2.095498 | up | noncoding | ENST00000427452 | BX004987.1    | chr1  | - |
| ASHG19A3A050894 | 0.009747 | 0.129005 | 2.434895 | up | noncoding | G43222          |               | chr14 | - |
| ASHG19A3A050929 | 0.001283 | 0.06217  | 29.10477 | up | noncoding | uc001xmj.1      | DQ594515      | chr14 | - |
| ASHG19A3A050942 | 0.031573 | 0.209725 | 3.72604  | up | noncoding | NR_024510       | LOC728855     | chr1  | - |
| ASHG19A3A050967 | 0.043412 | 0.239621 | 3.196501 | up | noncoding | uc001eky.3      | LOC728875     | chr1  | - |
| ASHG19A3A051119 | 0.026547 | 0.195066 | 2.200744 | up | noncoding | ENST00000412239 | RP11-315I20.1 | chr1  | - |
| ASHG19A3A051119 | 0.026547 | 0.195066 | 2.200744 | up | noncoding | ENST00000412239 | RP11-315I20.1 | chr1  | - |
| ASHG19A3A051223 | 0.000285 | 0.038184 | 58.63407 | up | noncoding | uc001vvl.3      | AK022914      | chr14 | + |
| ASHG19A3A051266 | 0.00129  | 0.06217  | 2.5212   | up | noncoding | uc001wbn.2      | TRV3J34       | chr14 | + |
| ASHG19A3A051440 | 0.001363 | 0.062406 | 4.227502 | up | noncoding | CR589979        |               | chr14 | + |
| ASHG19A3A051440 | 0.001363 | 0.062406 | 4.227502 | up | noncoding | CR589979        |               | chr14 | + |
| ASHG19A3A051440 | 0.001363 | 0.062406 | 4.227502 | up | noncoding | CR589979        |               | chr14 | + |
| ASHG19A3A051440 | 0.001363 | 0.062406 | 4.227502 | up | noncoding | CR589979        |               | chr14 | + |
| ASHG19A3A051452 | 0.0062   | 0.10778  | 2.077043 | up | noncoding | ENST00000487479 | RPL13AP3      | chr14 | + |
| ASHG19A3A051460 | 0.014285 | 0.147962 | 2.515495 | up | noncoding | ENST00000467870 | RP11-108M12.1 | chr14 | + |
| ASHG19A3A051479 | 0.009608 | 0.128384 | 5.363681 | up | noncoding | ENST00000428035 | RP11-495P10.6 | chr1  | - |
| ASHG19A3A051514 | 0.006787 | 0.112118 | 2.533664 | up | noncoding | BC041985        |               | chr14 | + |
| ASHG19A3A051516 | 0.000832 | 0.053939 | 4.114329 | up | noncoding | ENST00000497246 | CTD-2302E22.1 | chr14 | + |
| ASHG19A3A051720 | 0.02561  | 0.192438 | 2.007429 | up | noncoding | NR_024183       | C14orf48      | chr14 | + |
| ASHG19A3A051822 | 0.001325 | 0.06217  | 2.067389 | up | noncoding | ENST00000488133 | CTD-2538G10.1 | chr14 | + |
| ASHG19A3A051828 | 0.01036  | 0.131419 | 2.955341 | up | noncoding | uc001ymo.1      | CR611781      | chr14 | + |
| ASHG19A3A051863 | 0.047455 | 0.249029 | 2.559619 | up | noncoding | AK124813        |               | chr14 | + |
| ASHG19A3A051969 | 0.016062 | 0.155694 | 2.124013 | up | noncoding | ENST00000456396 | RP11-68I18.2  | chr1  | - |
| ASHG19A3A052036 | 0.002125 | 0.072257 | 2.644497 | up | noncoding | uc001exo.2      | BC021024      | chr1  | - |
| ASHG19A3A052244 | 0.040402 | 0.234463 | 3.800035 | up | noncoding | uc002aml.2      | AK093077      | chr15 | - |
| ASHG19A3A052244 | 0.040402 | 0.234463 | 3.800035 | up | noncoding | uc002aml.2      | AK093077      | chr15 | - |
| ASHG19A3A052298 | 0.022258 | 0.181462 | 2.52134  | up | noncoding | ENST00000469688 | RP11-13J17.1  | chr15 | - |
| ASHG19A3A052506 | 0.009863 | 0.129467 | 2.234456 | up | noncoding | uc002blm.2      | DQ598270      | chr15 | - |
| ASHG19A3A052573 | 0.001988 | 0.070561 | 3.289782 | up | noncoding | AK054700        |               | chr15 | - |
| ASHG19A3A052591 | 0.006541 | 0.11058  | 2.990006 | up | noncoding | ENST00000471472 | CTD-3221M10.1 | chr15 | - |
| ASHG19A3A052796 | 0.005591 | 0.10303  | 2.186112 | up | noncoding | NR_026757       | LOC729082     | chr15 | + |

|                 |          |          |          |    |           |                 |               |       |   |
|-----------------|----------|----------|----------|----|-----------|-----------------|---------------|-------|---|
| ASHG19A3A052831 | 0.003627 | 0.087297 | 2.758076 | up | noncoding | BC100296        |               | chr15 | + |
| ASHG19A3A052831 | 0.003627 | 0.087297 | 2.758076 | up | noncoding | BC100296        |               | chr15 | + |
| ASHG19A3A052831 | 0.003627 | 0.087297 | 2.758076 | up | noncoding | BC100296        |               | chr15 | + |
| ASHG19A3A052838 | 0.002834 | 0.080918 | 2.776085 | up | noncoding | uc001zsy.2      | BC062349      | chr15 | + |
| ASHG19A3A052838 | 0.002834 | 0.080918 | 2.776085 | up | noncoding | uc001zsy.2      | BC062349      | chr15 | + |
| ASHG19A3A052880 | 0.000132 | 0.031585 | 3.184419 | up | noncoding | L37698          |               | chr15 | + |
| ASHG19A3A052953 | 0.002482 | 0.075264 | 2.560394 | up | noncoding | AK126077        |               | chr15 | + |
| ASHG19A3A053119 | 0.003661 | 0.087426 | 2.163347 | up | noncoding | ENST00000456382 | RP11-29H23.4  | chr1  | - |
| ASHG19A3A053266 | 0.003076 | 0.082215 | 2.719253 | up | noncoding | ENST00000484702 | RP11-386M24.1 | chr15 | + |
| ASHG19A3A053289 | 0.026255 | 0.194534 | 2.791692 | up | noncoding | AL109706        |               | chr15 | + |
| ASHG19A3A053353 | 0.029266 | 0.203645 | 3.314809 | up | noncoding | uc002ckm.1      | BC098409      | chr16 | - |
| ASHG19A3A053433 | 0.015636 | 0.154374 | 3.137649 | up | noncoding | BC035759        |               | chr16 | - |
| ASHG19A3A053597 | 0.028397 | 0.201176 | 2.988337 | up | noncoding | HIT000218714    |               | chr16 | - |
| ASHG19A3A053617 | 1.05E-05 | 0.014362 | 19.85958 | up | noncoding | uc002dpc.1      | AX746995      | chr16 | - |
| ASHG19A3A053635 | 0.000659 | 0.050176 | 2.526381 | up | noncoding | ENST00000437413 | AC009086.1    | chr16 | - |
| ASHG19A3A053753 | 0.008213 | 0.120678 | 3.413581 | up | noncoding | ENST00000411236 | AC084058.2    | chr16 | - |
| ASHG19A3A053782 | 0.00065  | 0.050176 | 2.379591 | up | noncoding | HIT000337391    |               | chr16 | - |
| ASHG19A3A053802 | 0.000416 | 0.044424 | 2.013225 | up | noncoding | G43512          |               | chr16 | - |
| ASHG19A3A053802 | 0.000416 | 0.044424 | 2.013225 | up | noncoding | G43512          |               | chr16 | - |
| ASHG19A3A053984 | 0.03669  | 0.224917 | 2.386806 | up | noncoding | NR_033247       | LOC100329108  | chr16 | - |
| ASHG19A3A054022 | 0.002155 | 0.072257 | 3.268959 | up | noncoding | AL832093        |               | chr16 | - |
| ASHG19A3A054046 | 0.004633 | 0.09608  | 2.830155 | up | noncoding | NR_024488       | LOC100129637  | chr16 | - |
| ASHG19A3A054091 | 0.04198  | 0.238285 | 2.578708 | up | noncoding | ENST00000430178 | DDX11L10      | chr16 | + |
| ASHG19A3A054092 | 0.007403 | 0.114276 | 22.8868  | up | noncoding | uc002cfh.2      | BC032901      | chr16 | + |
| ASHG19A3A054110 | 0.001628 | 0.065924 | 3.172458 | up | noncoding | NR_024453       | LOC100134368  | chr16 | + |
| ASHG19A3A054360 | 0.001736 | 0.067157 | 3.033685 | up | noncoding | NR_026675       | NCRNA00169    | chr16 | + |
| ASHG19A3A054360 | 0.001736 | 0.067157 | 3.033685 | up | noncoding | NR_026675       | NCRNA00169    | chr16 | + |
| ASHG19A3A054409 | 0.048579 | 0.25108  | 2.938665 | up | noncoding | AF143879        |               | chr16 | + |
| ASHG19A3A054441 | 0.03117  | 0.208947 | 2.626614 | up | noncoding | NR_003369       | RRN3P2        | chr16 | + |
| ASHG19A3A054484 | 0.000957 | 0.056576 | 3.421835 | up | noncoding | uc002dyp.1      | AK056973      | chr16 | + |
| ASHG19A3A054559 | 0.002009 | 0.070654 | 2.083229 | up | noncoding | AK123174        |               | chr16 | + |
| ASHG19A3A054575 | 0.021295 | 0.177265 | 37.59144 | up | noncoding | AK023784        |               | chr16 | + |
| ASHG19A3A054621 | 0.004353 | 0.09407  | 3.03998  | up | noncoding | NR_003658       | MT1DP         | chr16 | + |

|                  |          |          |          |    |           |                                             |                    |       |   |
|------------------|----------|----------|----------|----|-----------|---------------------------------------------|--------------------|-------|---|
| ASHG19A3A054735  | 0.031886 | 0.211064 | 3.982872 | up | noncoding | G65644                                      |                    | chr1  | - |
| ASHG19A3A054787  | 0.004528 | 0.095403 | 2.611429 | up | noncoding | uc002fcj.1                                  | AK021563           | chr16 | + |
| ASHG19A3A054787  | 0.004528 | 0.095403 | 2.611429 | up | noncoding | uc002fcj.1                                  | AK021563           | chr16 | + |
| ASHG19A3A054858  | 0.03086  | 0.20838  | 2.163677 | up | noncoding | ENST00000443090                             | RP4-702J19.1       | chr1  | - |
| ASHG19A3A054858  | 0.03086  | 0.20838  | 2.163677 | up | noncoding | ENST00000443090                             | RP4-702J19.1       | chr1  | - |
| ASHG19A3A054858  | 0.03086  | 0.20838  | 2.163677 | up | noncoding | ENST00000443090                             | RP4-702J19.1       | chr1  | - |
| ASHG19A3A054858  | 0.03086  | 0.20838  | 2.163677 | up | noncoding | ENST00000443090                             | RP4-702J19.1       | chr1  | - |
| ASHG19A3A054935  | 0.012058 | 0.140376 | 4.846883 | up | noncoding | uc002fon.1                                  | AK096286           | chr16 | + |
| ASHG19A3A054938  | 0.01321  | 0.14482  | 6.320725 | up | noncoding | BC035173                                    |                    | chr16 | + |
| ASHG19A3A054938  | 0.01321  | 0.14482  | 6.320725 | up | noncoding | BC035173                                    |                    | chr16 | + |
| ASHG19A3A054958  | 0.010581 | 0.132404 | 2.708766 | up | noncoding | uc002fqw.2                                  | BC071667           | chr16 | + |
| ASHG19A3A054993  | 0.007515 | 0.114935 | 2.183375 | up | noncoding | HIT000249148                                |                    | chr17 | - |
| ASHG19A3A055081  | 0.019878 | 0.17297  | 2.343166 | up | noncoding | uc001hpx.2                                  | BC032899           | chr1  | + |
| ASHG19A3A055133  | 0.007482 | 0.114935 | 2.042301 | up | noncoding | uc002fke.2                                  | FLJ00104           | chr16 | - |
| ASHG19A3A055144  | 0.017493 | 0.163487 | 4.858126 | up | noncoding | uc002lal.1                                  | LOC647946          | chr18 | - |
| ASHG19A3A055154  | 0.023745 | 0.185665 | 2.318928 | up | noncoding | uc002qgt.1                                  | BC131616           | chr19 | + |
| ASHG19A3A055278  | 0.000495 | 0.045345 | 2.070978 | up | noncoding | uc010egm.1                                  | BC110060           | chr19 | - |
| ASHG19A3A055287  | 0.003906 | 0.089011 | 3.279195 | up | noncoding | uc010guv.1                                  | BC054862           | chr22 | - |
| ASHG19A3H0000054 | 0.00583  | 0.104857 | 2.697629 | up | noncoding | nc-HOXB4-176-                               | nc-HOXB4-176       | chr17 | - |
| ASHG19A3H0000085 | 0.011715 | 0.138492 | 6.10898  | up | noncoding | nc-HOXA5-68-                                | nc-HOXA5-68        | chr7  | - |
| ASHG19A3H0000098 | 0.002172 | 0.072533 | 2.484767 | up | noncoding | nc-HOXC10-119-                              | nc-HOXC10-119      | chr12 | + |
| ASHG19A3H0000160 | 0.010055 | 0.130183 | 2.718901 | up | noncoding | nc-HOXC9-138-                               | nc-HOXC9-138       | chr12 | + |
| ASHG19A3H0000195 | 0.005725 | 0.10433  | 2.249965 | up | noncoding | nc-HOXD4-32-                                | nc-HOXD4-32        | chr2  | + |
| ASHG19A3L0000009 | 0.044404 | 0.24227  | 2.79617  | up | noncoding | BX104325                                    | lincRNA-FAM102B-1  | chr1  | + |
| ASHG19A3L0000033 | 0.002798 | 0.080655 | 2.775014 | up | noncoding | DA807888                                    | lincRNA-LMX1A      | chr1  | + |
| ASHG19A3L0000039 | 0.001923 | 0.070261 | 4.456934 | up | noncoding | AV722915                                    | lincRNA-PTGS2-2    | chr1  | + |
| ASHG19A3L0000057 | 0.003192 | 0.083261 | 3.028718 | up | noncoding | chr1:198335952-198347302-39116163-39128263+ | lincRNA-NEK7       | chr1  | - |
| ASHG19A3L0000128 | 0.043065 | 0.238904 | 2.192684 | up | noncoding | 39128263+                                   | lincRNA-RRAGC-1    | chr1  | + |
| ASHG19A3L0000140 | 0.005646 | 0.103529 | 2.314505 | up | noncoding | exon90+                                     | lincRNA-KNCN       | chr1  | + |
| ASHG19A3L0000208 | 0.002145 | 0.072257 | 2.317311 | up | noncoding | BX101441                                    | lincRNA-C10orf46-1 | chr10 | + |
| ASHG19A3L0000269 | 0.000372 | 0.042176 | 3.016129 | up | noncoding | BG722956                                    | lincRNA-EGR2       | chr10 | - |

|                  |          |          |          |    |           |                                              |                   |       |   |
|------------------|----------|----------|----------|----|-----------|----------------------------------------------|-------------------|-------|---|
| ASHG19A3L0000269 | 0.000372 | 0.042176 | 3.016129 | up | noncoding | BG722956                                     | lincRNA-EGR2      | chr10 | - |
| ASHG19A3L0000269 | 0.000372 | 0.042176 | 3.016129 | up | noncoding | BG722956                                     | lincRNA-EGR2      | chr10 | - |
| ASHG19A3L0000269 | 0.000372 | 0.042176 | 3.016129 | up | noncoding | BG722956                                     | lincRNA-EGR2      | chr10 | - |
| ASHG19A3L0000329 | 0.023348 | 0.184707 | 2.555031 | up | noncoding | BI059095                                     | lincRNA-UBASH3B-1 | chr11 | + |
| ASHG19A3L0000388 | 0.044241 | 0.241882 | 2.559413 | up | noncoding | DA706379                                     | lincRNA-C1QTNF4   | chr11 | - |
| ASHG19A3L0000469 | 0.001324 | 0.06217  | 3.291176 | up | noncoding | BU657491                                     | lincRNA-CACNA1C   | chr12 | - |
| ASHG19A3L0000512 | 0.002957 | 0.081974 | 3.410225 | up | noncoding | BQ222987                                     | lincRNA-SLC16A7-7 | chr12 | - |
| ASHG19A3L0000538 | 0.022458 | 0.18214  | 2.322814 | up | noncoding | CD242216                                     | lincRNA-ALX1-1    | chr12 | - |
| ASHG19A3L0000591 | 0.042441 | 0.238285 | 2.455789 | up | noncoding | CD102777                                     | lincRNA-TPTE2     | chr13 | - |
| ASHG19A3L0000696 | 0.010837 | 0.133744 | 2.185569 | up | noncoding | AI902205                                     | lincRNA-OXGR1-2   | chr13 | - |
| ASHG19A3L0000711 | 0.008419 | 0.121805 | 2.92045  | up | noncoding | chr14:25152560-25164885-                     | lincRNA-GZMB      | chr14 | - |
| ASHG19A3L0000775 | 0.034166 | 0.216699 | 20.36229 | up | noncoding | AB208948                                     | lincRNA-STON2-2   | chr14 | - |
| ASHG19A3L0000868 | 0.005187 | 0.100612 | 79.57489 | up | noncoding | AF289584                                     | lincRNA-NKD1      | chr16 | + |
| ASHG19A3L0000868 | 0.005187 | 0.100612 | 79.57489 | up | noncoding | AF289584                                     | lincRNA-NKD1      | chr16 | + |
| ASHG19A3L0000868 | 0.005187 | 0.100612 | 79.57489 | up | noncoding | AF289584                                     | lincRNA-NKD1      | chr16 | + |
| ASHG19A3L0001003 | 0.005925 | 0.105251 | 2.209038 | up | noncoding | CB069168                                     | lincRNA-GALR1-4   | chr18 | - |
| ASHG19A3L0001037 | 0.029648 | 0.204946 | 2.643216 | up | noncoding | chr2:113359154-113374304-<br>chr2:129541655- | lincRNA-CHCHD5-1  | chr2  | - |
| ASHG19A3L0001061 | 0.007362 | 0.114264 | 3.253568 | up | noncoding | 129552355-<br>chr2:174248004-                | lincRNA-HS6ST1-6  | chr2  | - |
| ASHG19A3L0001108 | 0.021107 | 0.176601 | 2.52088  | up | noncoding | 174261129+                                   | lincRNA-SP3-2     | chr2  | + |
| ASHG19A3L0001123 | 0.005289 | 0.101436 | 2.850827 | up | noncoding | BF108976                                     | lincRNA-MYO1B-4   | chr2  | + |
| ASHG19A3L0001175 | 0.000723 | 0.051727 | 3.645009 | up | noncoding | CR625452                                     |                   | chr2  | - |
| ASHG19A3L0001177 | 0.043185 | 0.238984 | 2.23916  | up | noncoding | AW177676                                     | lincRNA-CAPN13    | chr2  | - |
| ASHG19A3L0001205 | 0.001735 | 0.067157 | 2.075238 | up | noncoding | CN289466                                     | lincRNA-MEIS1-1   | chr2  | - |
| ASHG19A3L0001226 | 0.037443 | 0.227009 | 3.071357 | up | noncoding | DA330754                                     | lincRNA-TMSB10    | chr2  | - |
| ASHG19A3L0001238 | 0.003378 | 0.084873 | 2.781365 | up | noncoding | chr2:91595323-91623173+                      | lincRNA-TEKT4-3   | chr2  | + |
| ASHG19A3L0001261 | 0.000867 | 0.054271 | 2.739739 | up | noncoding | exon2439+                                    | lincRNA-PTPN1-2   | chr20 | + |
| ASHG19A3L0001452 | 0.008774 | 0.123403 | 2.044952 | up | noncoding | BG677629                                     | lincRNA-ARSJ-2    | chr4  | - |
| ASHG19A3L0001614 | 0.000473 | 0.045345 | 2.664309 | up | noncoding | chr5:171107070-171142645+                    | lincRNA-FBXW11-3  | chr5  | + |



|                  |          |          |          |    |           |                           |                    |       |   |
|------------------|----------|----------|----------|----|-----------|---------------------------|--------------------|-------|---|
| ASHG19A3L0001655 | 0.023132 | 0.183821 | 2.067026 | up | noncoding | chr5:49632068-49662143-   | lincRNA-HCN1-1     | chr5  | - |
| ASHG19A3L0001686 | 0.001715 | 0.067108 | 2.214762 | up | noncoding | AW452601                  | lincRNA-MTX3       | chr5  | - |
| ASHG19A3L0001706 | 0.001991 | 0.070561 | 5.845898 | up | noncoding | CD000492                  | lincRNA-WISP3-2    | chr6  | + |
| ASHG19A3L0001719 | 0.002417 | 0.074687 | 3.291554 | up | noncoding | EL949266                  | lincRNA-CENPW-2    | chr6  | + |
| ASHG19A3L0001747 | 0.003648 | 0.087309 | 2.112016 | up | noncoding | chr6:150606082-150619632- | lincRNA-PPP1R14C   | chr6  | - |
| ASHG19A3L0001752 | 0.018168 | 0.166283 | 2.230671 | up | noncoding | BE439827                  | lincRNA-MAS1       | chr6  | - |
| ASHG19A3L0001782 | 0.00309  | 0.082215 | 3.566291 | up | noncoding | AW072314                  | lincRNA-OR2J2      | chr6  | - |
| ASHG19A3L0001794 | 0.001595 | 0.065335 | 2.97968  | up | noncoding | chr6:3775751-3789451-     | lincRNA-C6orf145-2 | chr6  | - |
| ASHG19A3L0001818 | 0.030668 | 0.207805 | 3.240873 | up | noncoding | chr6:63073666-63086291+   | lincRNA-LGSN       | chr6  | + |
| ASHG19A3L0001877 | 0.03588  | 0.223048 | 2.235852 | up | noncoding | chr7:143147778-143169303- | lincRNA-TAS2R60    | chr7  | - |
| ASHG19A3L0001982 | 0.020453 | 0.174085 | 2.526349 | up | noncoding | BU624419                  | lincRNA-HAS2-3     | chr8  | + |
| ASHG19A3L0001985 | 0.000308 | 0.039856 | 2.27709  | up | noncoding | AI004797                  | lincRNA-HAS2-1     | chr8  | - |
| ASHG19A3L0002005 | 0.000234 | 0.035463 | 2.443858 | up | noncoding | AA528614                  | lincRNA-MYC-10     | chr8  | - |
| ASHG19A3L0002080 | 0.013286 | 0.145333 | 2.330023 | up | noncoding | chr8:37531517-37542367+   | lincRNA-ZNF703-1   | chr8  | + |
| ASHG19A3L0002181 | 0.003425 | 0.084956 | 2.826239 | up | noncoding | exon4209-                 | lincRNA-NIPAL2-2   | chr8  | - |
| ASHG19A3L0002216 | 0.007365 | 0.114264 | 2.178215 | up | noncoding | BG427746                  | lincRNA-VLDLR-2    | chr9  | - |
| ASHG19A3L0002222 | 0.007845 | 0.118054 | 2.491698 | up | noncoding | AK021739                  | lincRNA-JAK2-2     | chr9  | + |
| ASHG19A3L0002261 | 0.007084 | 0.113409 | 2.212441 | up | noncoding | BF509048                  | lincRNA-FAM9C-3    | chrX  | - |
| ASHG19A3L0002327 | 0.027753 | 0.199057 | 2.50003  | up | noncoding | BX096636                  | lincRNA-STARD8     | chrX  | + |
| ASHG19A3L0002480 | 0.007052 | 0.113157 | 2.451262 | up | noncoding | BC037864                  | lincRNA-CD247      | chr1  | + |
| ASHG19A3L0002480 | 0.007052 | 0.113157 | 2.451262 | up | noncoding | BC037864                  | lincRNA-CD247      | chr1  | + |
| ASHG19A3L0002480 | 0.007052 | 0.113157 | 2.451262 | up | noncoding | BC037864                  | lincRNA-CD247      | chr1  | + |
| ASHG19A3L0002515 | 0.04374  | 0.240512 | 11.36495 | up | noncoding | AF191495                  | lincRNA-F11R       | chr1  | - |
| ASHG19A3L0002515 | 0.04374  | 0.240512 | 11.36495 | up | noncoding | AF191495                  | lincRNA-F11R       | chr1  | - |
| ASHG19A3L0002515 | 0.04374  | 0.240512 | 11.36495 | up | noncoding | AF191495                  | lincRNA-F11R       | chr1  | - |
| ASHG19A3L0002515 | 0.04374  | 0.240512 | 11.36495 | up | noncoding | AF191495                  | lincRNA-F11R       | chr1  | - |
| ASHG19A3L0002554 | 0.010643 | 0.132542 | 2.31827  | up | noncoding | AW879648                  | lincRNA-SLC37A3-2  | chr7  | + |
| ASHG19A3L0002628 | 0.021421 | 0.177744 | 2.081036 | up | noncoding | DW449276                  | lincRNA-CHD2-2     | chr15 | + |
| ASHG19A3L0002669 | 0.000425 | 0.044424 | 2.231204 | up | noncoding | DB349013                  | lincRNA-DCTD       | chr4  | + |

|                      |          |          |          |    |           |                          |                   |       |   |
|----------------------|----------|----------|----------|----|-----------|--------------------------|-------------------|-------|---|
| ASHG19A3L0002720     | 0.005974 | 0.105807 | 5.358188 | up | noncoding | BX102989                 | lincRNA-SPATA19-2 | chr11 | - |
| ASHG19A3L0002750     | 0.045063 | 0.243678 | 2.902004 | up | noncoding | EB386665                 | lincRNA-SLN       | chr11 | - |
| ASHG19A3L0002753     | 0.04705  | 0.248467 | 2.395737 | up | noncoding | BG977395                 | lincRNA-PSTPIP1   | chr15 | + |
| ASHG19A3L0002884     | 0.001061 | 0.057323 | 2.301621 | up | noncoding | chrX:11801246-11812911+  | lincRNA-FRMPD4    | chrX  | + |
| ASHG19A3L0002908     | 0.000112 | 0.031537 | 2.1058   | up | noncoding | AA628127                 | lincRNA-PRDM14    | chr8  | + |
| ASHG19A3L0002967     | 0.01393  | 0.146871 | 2.649706 | up | noncoding | AU185412                 | lincRNA-LIG3      | chr17 | + |
| ASHG19A3L0003045     | 0.008403 | 0.121805 | 3.40029  | up | noncoding | chr14:93595225-93603463+ | lincRNA-MOAP1     | chr14 | + |
| ASHG19A3L0003063     | 0.014386 | 0.148592 | 3.295149 | up | noncoding | BG197454                 | lincRNA-NRSN1-4   | chr6  | + |
| ASHG19A3L0003067     | 0.037175 | 0.226567 | 2.828724 | up | noncoding | AK125314                 |                   | chr6  | + |
| ASHG19A3L0003067     | 0.037175 | 0.226567 | 2.828724 | up | noncoding | AK125314                 |                   | chr6  | + |
| ASHG19A3L0003067     | 0.037175 | 0.226567 | 2.828724 | up | noncoding | AK125314                 |                   | chr6  | + |
| ASHG19A3L0003067     | 0.037175 | 0.226567 | 2.828724 | up | noncoding | AK125314                 |                   | chr6  | + |
| ASHG19A3L0003067     | 0.037175 | 0.226567 | 2.828724 | up | noncoding | AK125314                 |                   | chr6  | + |
| ASHG19A3L0003071     | 0.006743 | 0.112118 | 4.353722 | up | noncoding | chr6:13349175-13352025-  | lincRNA-TBC1D7    | chr6  | - |
| ASHG19A3L0003118     | 0.021147 | 0.176675 | 2.130693 | up | noncoding | AA219324                 | lincRNA-PDE4D-1   | chr5  | + |
| ASHG19A3L0003271     | 0.012031 | 0.140291 | 4.061936 | up | noncoding | chr8:49776604-49779322+  | lincRNA-SNAI2-1   | chr8  | + |
| ASHG19A3L0003298     | 0.003651 | 0.087309 | 2.154043 | up | noncoding | AW269809                 | lincRNA-KPNA1     | chr3  | - |
| ASHG19A3L0003432     | 0.018288 | 0.166717 | 3.109658 | up | noncoding | chr9:81993205-81999034-  | lincRNA-PSAT1-1   | chr9  | - |
| ASHG19A3L0003458     | 0.011476 | 0.137737 | 3.071161 | up | noncoding | AA136769                 | lincRNA-INSIG2-2  | chr2  | - |
| ASHG19A3L0003534     | 0.018357 | 0.166877 | 3.284287 | up | noncoding | AA368654                 | lincRNA-OPTC      | chr1  | - |
| CUST_107_PI426075208 | 0.000272 | 0.03723  | 2.423003 | up | noncoding | nc-HOXC10-128+           | nc-HOXC10-128     | chr12 | - |
| CUST_117_PI426075208 | 0.033435 | 0.214768 | 2.139586 | up | noncoding | nc-HOXC11-115+           | nc-HOXC11-115     | chr12 | - |
| CUST_122_PI426075208 | 0.029845 | 0.205361 | 2.134366 | up | noncoding | nc-HOXC13-102+           | nc-HOXC13-102     | chr12 | - |
| CUST_126_PI426075208 | 0.00542  | 0.102521 | 2.830932 | up | noncoding | nc-HOXC4-264+            | nc-HOXC4-264      | chr12 | - |
| CUST_134_PI426075208 | 0.000744 | 0.051923 | 2.673461 | up | noncoding | nc-HOXC6-240+            | nc-HOXC6-240      | chr12 | - |
| CUST_134_PI426075208 | 0.000744 | 0.051923 | 2.673461 | up | noncoding | nc-HOXC6-240+            | nc-HOXC6-240      | chr12 | - |
| CUST_146_PI426075208 | 0.003031 | 0.082215 | 2.052998 | up | noncoding | nc-HOXC6-252+            | nc-HOXC6-252      | chr12 | - |
| CUST_146_PI426075208 | 0.003031 | 0.082215 | 2.052998 | up | noncoding | nc-HOXC6-252+            | nc-HOXC6-252      | chr12 | - |
| CUST_146_PI426075208 | 0.003031 | 0.082215 | 2.052998 | up | noncoding | nc-HOXC6-252+            | nc-HOXC6-252      | chr12 | - |
| CUST_163_PI426075208 | 0.001763 | 0.067369 | 2.282472 | up | noncoding | nc-HOXC9-142+            | nc-HOXC9-142      | chr12 | - |

|                      |          |          |          |    |           |               |              |       |   |
|----------------------|----------|----------|----------|----|-----------|---------------|--------------|-------|---|
| CUST_18_PI426073487  | 0.007388 | 0.114276 | 6.517431 | up | noncoding | uc.19+        | uc.19        | chr1  | + |
| CUST_199_PI426073487 | 0.000205 | 0.034555 | 3.412107 | up | noncoding | uc.201+       | uc.201       | chr6  | + |
| CUST_2_PI426075208   | 0.022724 | 0.182507 | 2.579227 | up | noncoding | nc-HOXA10-82+ | nc-HOXA10-82 | chr7  | + |
| CUST_454_PI426073487 | 0.009511 | 0.127832 | 8.7915   | up | noncoding | uc.456+       | uc.456       | chr20 | + |
| CUST_642_PI426073487 | 0.003528 | 0.086049 | 2.16376  | up | noncoding | uc.163-       | uc.163       | chr5  | - |
| CUST_761_PI426073487 | 0.012111 | 0.140629 | 2.61045  | up | noncoding | uc.282-       | uc.282       | chr9  | - |
| CUST_761_PI426073487 | 0.012111 | 0.140629 | 2.61045  | up | noncoding | uc.282-       | uc.282       | chr9  | - |
| CUST_761_PI426073487 | 0.012111 | 0.140629 | 2.61045  | up | noncoding | uc.282-       | uc.282       | chr9  | - |
| CUST_761_PI426073487 | 0.012111 | 0.140629 | 2.61045  | up | noncoding | uc.282-       | uc.282       | chr9  | - |
| CUST_761_PI426073487 | 0.012111 | 0.140629 | 2.61045  | up | noncoding | uc.282-       | uc.282       | chr9  | - |
| CUST_772_PI426073487 | 0.004489 | 0.095366 | 2.360559 | up | noncoding | uc.293-       | uc.293       | chr10 | - |
| CUST_787_PI426073487 | 0.000858 | 0.054175 | 2.165603 | up | noncoding | uc.308-       | uc.308       | chr10 | - |
| CUST_787_PI426073487 | 0.000858 | 0.054175 | 2.165603 | up | noncoding | uc.308-       | uc.308       | chr10 | - |
| CUST_941_PI426073487 | 0.004274 | 0.092902 | 2.392708 | up | noncoding | uc.462-       | uc.462       | chrX  | - |

**Supplementary Table 1-4. The list of lncRNAs downregulated in CRC.**

| ProbeName       | P-value and FDR |          | Fold change and Regulation |            | type      | seqname         | GeneSymbol    | chrom | strand |
|-----------------|-----------------|----------|----------------------------|------------|-----------|-----------------|---------------|-------|--------|
|                 | p-value         | FDR      | FCAbsolute                 | regulation |           |                 |               |       |        |
| ASHG19A3A000013 | 0.035355        | 0.221291 | 11.18315                   | down       | noncoding | AK091713        |               | chr11 | -      |
| ASHG19A3A000145 | 0.048419        | 0.250586 | 4.056488                   | down       | noncoding | ENST00000420855 | RP11-561O23.6 | chr9  | -      |
| ASHG19A3A000339 | 0.00295         | 0.081974 | 2.153523                   | down       | noncoding | ENST00000452637 | RP11-403I13.7 | chr1  | +      |
| ASHG19A3A007146 | 0.013608        | 0.145815 | 2.141658                   | down       | noncoding | NR_003530       | MEG3          | chr14 | +      |
| ASHG19A3A007147 | 0.000667        | 0.050329 | 3.945284                   | down       | noncoding | NR_003531       | MEG3          | chr14 | +      |
| ASHG19A3A007176 | 0.003887        | 0.089011 | 2.815475                   | down       | noncoding | NR_015359       | C4orf12       | chr4  | +      |
| ASHG19A3A007237 | 0.003282        | 0.083828 | 3.278426                   | down       | noncoding | NR_024123       | PBX3          | chr9  | +      |
| ASHG19A3A007237 | 0.003282        | 0.083828 | 3.278426                   | down       | noncoding | NR_024123       | PBX3          | chr9  | +      |
| ASHG19A3A007250 | 0.038755        | 0.230358 | 2.020224                   | down       | noncoding | NR_024148       | RNF121        | chr11 | +      |
| ASHG19A3A007259 | 0.016458        | 0.15794  | 2.187696                   | down       | noncoding | NR_024174       | MKNK1         | chr1  | -      |
| ASHG19A3A007259 | 0.016458        | 0.15794  | 2.187696                   | down       | noncoding | NR_024174       | MKNK1         | chr1  | -      |
| ASHG19A3A007259 | 0.016458        | 0.15794  | 2.187696                   | down       | noncoding | NR_024174       | MKNK1         | chr1  | -      |

|                 |          |          |          |      |           |           |           |       |   |
|-----------------|----------|----------|----------|------|-----------|-----------|-----------|-------|---|
| ASHG19A3A007261 | 0.009241 | 0.126124 | 3.740524 | down | noncoding | NR_024179 | PDLIM5    | chr4  | + |
| ASHG19A3A007261 | 0.009241 | 0.126124 | 3.740524 | down | noncoding | NR_024179 | PDLIM5    | chr4  | + |
| ASHG19A3A007261 | 0.009241 | 0.126124 | 3.740524 | down | noncoding | NR_024179 | PDLIM5    | chr4  | + |
| ASHG19A3A007261 | 0.009241 | 0.126124 | 3.740524 | down | noncoding | NR_024179 | PDLIM5    | chr4  | + |
| ASHG19A3A007268 | 0.039025 | 0.230484 | 2.820669 | down | noncoding | NR_024203 | ECD       | chr10 | - |
| ASHG19A3A007268 | 0.039025 | 0.230484 | 2.820669 | down | noncoding | NR_024203 | ECD       | chr10 | - |
| ASHG19A3A007268 | 0.039025 | 0.230484 | 2.820669 | down | noncoding | NR_024203 | ECD       | chr10 | - |
| ASHG19A3A007268 | 0.039025 | 0.230484 | 2.820669 | down | noncoding | NR_024203 | ECD       | chr10 | - |
| ASHG19A3A007278 | 0.02474  | 0.189386 | 3.488631 | down | noncoding | NR_024248 | LOC650368 | chr11 | + |
| ASHG19A3A007337 | 0.008177 | 0.120639 | 26.85088 | down | noncoding | NR_024537 | GSTM3     | chr1  | - |
| ASHG19A3A007338 | 0.005314 | 0.101436 | 3.530916 | down | noncoding | NR_024538 | GSTM4     | chr1  | + |
| ASHG19A3A007338 | 0.005314 | 0.101436 | 3.530916 | down | noncoding | NR_024538 | GSTM4     | chr1  | + |
| ASHG19A3A007347 | 1.05E-05 | 0.014362 | 11.71695 | down | noncoding | NR_024575 | RAB34     | chr17 | - |
| ASHG19A3A007347 | 1.05E-05 | 0.014362 | 11.71695 | down | noncoding | NR_024575 | RAB34     | chr17 | - |
| ASHG19A3A007347 | 1.05E-05 | 0.014362 | 11.71695 | down | noncoding | NR_024575 | RAB34     | chr17 | - |
| ASHG19A3A007347 | 1.05E-05 | 0.014362 | 11.71695 | down | noncoding | NR_024575 | RAB34     | chr17 | - |
| ASHG19A3A007347 | 1.05E-05 | 0.014362 | 11.71695 | down | noncoding | NR_024575 | RAB34     | chr17 | - |
| ASHG19A3A007383 | 0.025546 | 0.192321 | 4.240425 | down | noncoding | NR_026571 | NOX4      | chr11 | - |
| ASHG19A3A007383 | 0.025546 | 0.192321 | 4.240425 | down | noncoding | NR_026571 | NOX4      | chr11 | - |
| ASHG19A3A007383 | 0.025546 | 0.192321 | 4.240425 | down | noncoding | NR_026571 | NOX4      | chr11 | - |
| ASHG19A3A007388 | 0.015448 | 0.153961 | 3.219756 | down | noncoding | NR_026645 | DET1      | chr15 | - |
| ASHG19A3A007388 | 0.015448 | 0.153961 | 3.219756 | down | noncoding | NR_026645 | DET1      | chr15 | - |
| ASHG19A3A007443 | 0.011715 | 0.138492 | 2.859855 | down | noncoding | NR_026936 | C5orf27   | chr5  | + |
| ASHG19A3A007459 | 0.022808 | 0.182698 | 2.916357 | down | noncoding | NR_027026 | GUSBP1    | chr5  | + |
| ASHG19A3A007513 | 0.006207 | 0.10778  | 11.20635 | down | noncoding | NR_027391 | SLC15A3   | chr11 | - |
| ASHG19A3A007513 | 0.006207 | 0.10778  | 11.20635 | down | noncoding | NR_027391 | SLC15A3   | chr11 | - |
| ASHG19A3A007513 | 0.006207 | 0.10778  | 11.20635 | down | noncoding | NR_027391 | SLC15A3   | chr11 | - |
| ASHG19A3A007518 | 5.89E-05 | 0.022687 | 6.170377 | down | noncoding | NR_027400 | SMPD1     | chr11 | + |
| ASHG19A3A007518 | 5.89E-05 | 0.022687 | 6.170377 | down | noncoding | NR_027400 | SMPD1     | chr11 | + |
| ASHG19A3A007546 | 0.016285 | 0.156884 | 5.570852 | down | noncoding | NR_027638 | ADAM9     | chr8  | + |
| ASHG19A3A007546 | 0.016285 | 0.156884 | 5.570852 | down | noncoding | NR_027638 | ADAM9     | chr8  | + |
| ASHG19A3A007546 | 0.016285 | 0.156884 | 5.570852 | down | noncoding | NR_027638 | ADAM9     | chr8  | + |
| ASHG19A3A007546 | 0.016285 | 0.156884 | 5.570852 | down | noncoding | NR_027638 | ADAM9     | chr8  | + |



|                 |          |          |          |      |           |           |             |       |   |
|-----------------|----------|----------|----------|------|-----------|-----------|-------------|-------|---|
| ASHG19A3A007650 | 0.033306 | 0.214597 | 2.000181 | down | noncoding | NR_028400 | TSNAX-DISC1 | chr1  | + |
| ASHG19A3A007650 | 0.033306 | 0.214597 | 2.000181 | down | noncoding | NR_028400 | TSNAX-DISC1 | chr1  | + |
| ASHG19A3A007650 | 0.033306 | 0.214597 | 2.000181 | down | noncoding | NR_028400 | TSNAX-DISC1 | chr1  | + |
| ASHG19A3A007650 | 0.033306 | 0.214597 | 2.000181 | down | noncoding | NR_028400 | TSNAX-DISC1 | chr1  | + |
| ASHG19A3A007650 | 0.033306 | 0.214597 | 2.000181 | down | noncoding | NR_028400 | TSNAX-DISC1 | chr1  | + |
| ASHG19A3A007652 | 0.035376 | 0.221291 | 3.183747 | down | noncoding | NR_028398 | TSNAX-DISC1 | chr1  | + |
| ASHG19A3A007652 | 0.035376 | 0.221291 | 3.183747 | down | noncoding | NR_028398 | TSNAX-DISC1 | chr1  | + |
| ASHG19A3A007652 | 0.035376 | 0.221291 | 3.183747 | down | noncoding | NR_028398 | TSNAX-DISC1 | chr1  | + |
| ASHG19A3A007652 | 0.035376 | 0.221291 | 3.183747 | down | noncoding | NR_028398 | TSNAX-DISC1 | chr1  | + |
| ASHG19A3A007652 | 0.035376 | 0.221291 | 3.183747 | down | noncoding | NR_028398 | TSNAX-DISC1 | chr1  | + |
| ASHG19A3A007652 | 0.035376 | 0.221291 | 3.183747 | down | noncoding | NR_028398 | TSNAX-DISC1 | chr1  | + |
| ASHG19A3A007652 | 0.035376 | 0.221291 | 3.183747 | down | noncoding | NR_028398 | TSNAX-DISC1 | chr1  | + |
| ASHG19A3A007652 | 0.035376 | 0.221291 | 3.183747 | down | noncoding | NR_028398 | TSNAX-DISC1 | chr1  | + |
| ASHG19A3A007652 | 0.035376 | 0.221291 | 3.183747 | down | noncoding | NR_028398 | TSNAX-DISC1 | chr1  | + |
| ASHG19A3A007652 | 0.035376 | 0.221291 | 3.183747 | down | noncoding | NR_028398 | TSNAX-DISC1 | chr1  | + |
| ASHG19A3A007652 | 0.035376 | 0.221291 | 3.183747 | down | noncoding | NR_028398 | TSNAX-DISC1 | chr1  | + |
| ASHG19A3A007652 | 0.035376 | 0.221291 | 3.183747 | down | noncoding | NR_028398 | TSNAX-DISC1 | chr1  | + |
| ASHG19A3A007652 | 0.035376 | 0.221291 | 3.183747 | down | noncoding | NR_028398 | TSNAX-DISC1 | chr1  | + |
| ASHG19A3A007652 | 0.035376 | 0.221291 | 3.183747 | down | noncoding | NR_028398 | TSNAX-DISC1 | chr1  | + |
| ASHG19A3A007652 | 0.035376 | 0.221291 | 3.183747 | down | noncoding | NR_028398 | TSNAX-DISC1 | chr1  | + |
| ASHG19A3A007652 | 0.035376 | 0.221291 | 3.183747 | down | noncoding | NR_028398 | TSNAX-DISC1 | chr1  | + |
| ASHG19A3A007652 | 0.035376 | 0.221291 | 3.183747 | down | noncoding | NR_028398 | TSNAX-DISC1 | chr1  | + |
| ASHG19A3A007677 | 0.000493 | 0.045345 | 6.7526   | down | noncoding | NR_028503 | C17orf91    | chr17 | - |
| ASHG19A3A007677 | 0.000493 | 0.045345 | 6.7526   | down | noncoding | NR_028503 | C17orf91    | chr17 | - |
| ASHG19A3A007678 | 0.000114 | 0.031537 | 8.084557 | down | noncoding | NR_028505 | C17orf91    | chr17 | - |

|                 |          |          |          |      |           |                 |               |       |   |
|-----------------|----------|----------|----------|------|-----------|-----------------|---------------|-------|---|
| ASHG19A3A007678 | 0.000114 | 0.031537 | 8.084557 | down | noncoding | NR_028505       | C17orf91      | chr17 | - |
| ASHG19A3A007708 | 0.014608 | 0.149756 | 2.385397 | down | noncoding | NR_030775       | SHISA4        | chr1  | + |
| ASHG19A3A007764 | 0.000633 | 0.049752 | 12.1949  | down | noncoding | NR_033360       | MEG3          | chr14 | + |
| ASHG19A3A007770 | 0.010006 | 0.130183 | 2.399211 | down | noncoding | NR_033390       | TYROBP        | chr19 | - |
| ASHG19A3A007770 | 0.010006 | 0.130183 | 2.399211 | down | noncoding | NR_033390       | TYROBP        | chr19 | - |
| ASHG19A3A007770 | 0.010006 | 0.130183 | 2.399211 | down | noncoding | NR_033390       | TYROBP        | chr19 | - |
| ASHG19A3A007770 | 0.010006 | 0.130183 | 2.399211 | down | noncoding | NR_033390       | TYROBP        | chr19 | - |
| ASHG19A3A007789 | 0.030536 | 0.207536 | 2.175735 | down | noncoding | NR_033440       | PAM           | chr5  | + |
| ASHG19A3A007789 | 0.030536 | 0.207536 | 2.175735 | down | noncoding | NR_033440       | PAM           | chr5  | + |
| ASHG19A3A007789 | 0.030536 | 0.207536 | 2.175735 | down | noncoding | NR_033440       | PAM           | chr5  | + |
| ASHG19A3A007789 | 0.030536 | 0.207536 | 2.175735 | down | noncoding | NR_033440       | PAM           | chr5  | + |
| ASHG19A3A007789 | 0.030536 | 0.207536 | 2.175735 | down | noncoding | NR_033440       | PAM           | chr5  | + |
| ASHG19A3A007799 | 0.005473 | 0.102582 | 3.548022 | down | noncoding | NR_033655       | AGA           | chr4  | - |
| ASHG19A3A007799 | 0.005473 | 0.102582 | 3.548022 | down | noncoding | NR_033655       | AGA           | chr4  | - |
| ASHG19A3A007982 | 0.006619 | 0.111318 | 2.549635 | down | noncoding | uc001gix.1      | AK127238      | chr1  | - |
| ASHG19A3A008016 | 0.049289 | 0.252234 | 2.511591 | down | noncoding | ENST00000430089 | AC087163.3    | chr17 | - |
| ASHG19A3A008016 | 0.049289 | 0.252234 | 2.511591 | down | noncoding | ENST00000430089 | AC087163.3    | chr17 | - |
| ASHG19A3A008016 | 0.049289 | 0.252234 | 2.511591 | down | noncoding | ENST00000430089 | AC087163.3    | chr17 | - |
| ASHG19A3A008016 | 0.049289 | 0.252234 | 2.511591 | down | noncoding | ENST00000430089 | AC087163.3    | chr17 | - |
| ASHG19A3A008039 | 0.042785 | 0.238618 | 2.892474 | down | noncoding | uc002gva.1      | BC058012      | chr17 | - |
| ASHG19A3A008094 | 0.018077 | 0.166283 | 3.789972 | down | noncoding | U00949          |               | chr17 | - |
| ASHG19A3A008245 | 0.013763 | 0.146386 | 4.893795 | down | noncoding | ENST00000426575 | RP11-318C24.2 | chr1  | - |
| ASHG19A3A008547 | 0.023355 | 0.184707 | 2.553106 | down | noncoding | AF086173        |               | chr1  | - |
| ASHG19A3A008551 | 0.012307 | 0.141526 | 2.616068 | down | noncoding | ENST00000509424 | RP5-875H18.2  | chr17 | - |
| ASHG19A3A008551 | 0.012307 | 0.141526 | 2.616068 | down | noncoding | ENST00000509424 | RP5-875H18.2  | chr17 | - |
| ASHG19A3A008642 | 0.009169 | 0.125764 | 3.188566 | down | noncoding | AF130062        |               | chr17 | - |
| ASHG19A3A008652 | 0.026244 | 0.194534 | 2.552466 | down | noncoding | NR_030732       | LOC645638     | chr17 | - |
| ASHG19A3A008736 | 0.016089 | 0.155694 | 7.877248 | down | noncoding | HIT000016017    |               | chr17 | - |
| ASHG19A3A008876 | 0.001588 | 0.065335 | 3.825272 | down | noncoding | uc002jyv.1      | AK127919      | chr17 | - |
| ASHG19A3A008876 | 0.001588 | 0.065335 | 3.825272 | down | noncoding | uc002jyv.1      | AK127919      | chr17 | - |
| ASHG19A3A008927 | 0.008986 | 0.124963 | 3.14114  | down | noncoding | HIT000022845    |               | chr17 | - |
| ASHG19A3A009180 | 0.019635 | 0.172352 | 2.999795 | down | noncoding | ENST00000423783 | AC055811.5    | chr17 | + |
| ASHG19A3A009251 | 0.025389 | 0.192173 | 3.224276 | down | noncoding | uc010cqz.2      | AK310665      | chr17 | + |

|                 |          |          |          |      |           |                 |               |       |   |
|-----------------|----------|----------|----------|------|-----------|-----------------|---------------|-------|---|
| ASHG19A3A009258 | 0.015152 | 0.152727 | 6.221829 | down | noncoding | ENST00000340731 | AC087499.3    | chr17 | + |
| ASHG19A3A009385 | 0.01611  | 0.155802 | 2.698186 | down | noncoding | BC016000        |               | chr1  | - |
| ASHG19A3A009453 | 0.015709 | 0.154761 | 2.893547 | down | noncoding | uc002hrb.1      | AK090935      | chr17 | + |
| ASHG19A3A009819 | 0.019669 | 0.172352 | 11.84083 | down | noncoding | CR594811        |               | chr17 | + |
| ASHG19A3A009878 | 1.3E-05  | 0.014741 | 4.799091 | down | noncoding | ENST00000412707 | AC118653.1    | chr17 | + |
| ASHG19A3A009987 | 0.004379 | 0.094352 | 6.798641 | down | noncoding | ENST00000432760 | RP11-397P13.6 | chr1  | - |
| ASHG19A3A010085 | 0.000778 | 0.05336  | 3.766683 | down | noncoding | G36948          |               | chr17 | + |
| ASHG19A3A010085 | 0.000778 | 0.05336  | 3.766683 | down | noncoding | G36948          |               | chr17 | + |
| ASHG19A3A010100 | 0.024813 | 0.189557 | 2.352687 | down | noncoding | ENST00000513236 | AC139099.3    | chr17 | + |
| ASHG19A3A010146 | 0.010122 | 0.130494 | 2.64879  | down | noncoding | G36902          |               | chr18 | - |
| ASHG19A3A010146 | 0.010122 | 0.130494 | 2.64879  | down | noncoding | G36902          |               | chr18 | - |
| ASHG19A3A010146 | 0.010122 | 0.130494 | 2.64879  | down | noncoding | G36902          |               | chr18 | - |
| ASHG19A3A010352 | 0.038929 | 0.230384 | 17.53229 | down | noncoding | BC071787        |               | chr18 | - |
| ASHG19A3A010628 | 0.006221 | 0.107899 | 8.913055 | down | noncoding | G36872          |               | chr18 | + |
| ASHG19A3A010636 | 0.000116 | 0.031537 | 3.885074 | down | noncoding | AK090802        |               | chr18 | + |
| ASHG19A3A010639 | 0.009709 | 0.128705 | 3.299163 | down | noncoding | ENST00000432117 | AC037473.1    | chr18 | + |
| ASHG19A3A010699 | 0.044429 | 0.24227  | 2.334582 | down | noncoding | ENST00000417675 | AC090771.2    | chr18 | + |
| ASHG19A3A010706 | 0.029899 | 0.205361 | 3.823626 | down | noncoding | ENST00000475372 | RP11-640A1.1  | chr18 | + |
| ASHG19A3A010990 | 0.012221 | 0.141008 | 3.083144 | down | noncoding | ENST00000436983 | RP11-365D23.2 | chr1  | - |
| ASHG19A3A011011 | 0.026148 | 0.194031 | 8.936636 | down | noncoding | AK024250        |               | chr19 | - |
| ASHG19A3A011353 | 0.022619 | 0.182257 | 3.654702 | down | noncoding | ENST00000448432 | RP11-453O22.1 | chr1  | - |
| ASHG19A3A011437 | 0.010016 | 0.130183 | 2.028761 | down | noncoding | AK095904        |               | chr1  | - |
| ASHG19A3A011526 | 0.021992 | 0.179745 | 5.14609  | down | noncoding | ENST00000489959 | CEACAMP10     | chr19 | - |
| ASHG19A3A011547 | 0.010748 | 0.133399 | 11.76546 | down | noncoding | uc002oxl.2      | BC041923      | chr19 | - |
| ASHG19A3A011548 | 0.005787 | 0.104589 | 9.932334 | down | noncoding | ENST00000498944 | AC006213.1    | chr19 | - |
| ASHG19A3A011551 | 0.016376 | 0.157656 | 3.30478  | down | noncoding | NR_033341       | LOC100379224  | chr19 | - |
| ASHG19A3A011551 | 0.016376 | 0.157656 | 3.30478  | down | noncoding | NR_033341       | LOC100379224  | chr19 | - |
| ASHG19A3A011746 | 0.002983 | 0.082215 | 5.512335 | down | noncoding | BC045766        |               | chr19 | - |
| ASHG19A3A011746 | 0.002983 | 0.082215 | 5.512335 | down | noncoding | BC045766        |               | chr19 | - |
| ASHG19A3A011815 | 0.009014 | 0.125    | 3.507328 | down | noncoding | ENST00000413496 | AC008440.5    | chr19 | - |
| ASHG19A3A011815 | 0.009014 | 0.125    | 3.507328 | down | noncoding | ENST00000413496 | AC008440.5    | chr19 | - |
| ASHG19A3A011815 | 0.009014 | 0.125    | 3.507328 | down | noncoding | ENST00000413496 | AC008440.5    | chr19 | - |
| ASHG19A3A011815 | 0.009014 | 0.125    | 3.507328 | down | noncoding | ENST00000413496 | AC008440.5    | chr19 | - |



|                 |          |          |          |      |           |                 |              |       |   |
|-----------------|----------|----------|----------|------|-----------|-----------------|--------------|-------|---|
| ASHG19A3A011815 | 0.009014 | 0.125    | 3.507328 | down | noncoding | ENST00000413496 | AC008440.5   | chr19 | - |
| ASHG19A3A012021 | 0.013764 | 0.146386 | 9.538083 | down | noncoding | ENST00000400795 | RP1-21O18.3  | chr1  | - |
| ASHG19A3A012021 | 0.013764 | 0.146386 | 9.538083 | down | noncoding | ENST00000400795 | RP1-21O18.3  | chr1  | - |
| ASHG19A3A012021 | 0.013764 | 0.146386 | 9.538083 | down | noncoding | ENST00000400795 | RP1-21O18.3  | chr1  | - |
| ASHG19A3A012021 | 0.013764 | 0.146386 | 9.538083 | down | noncoding | ENST00000400795 | RP1-21O18.3  | chr1  | - |
| ASHG19A3A012151 | 0.023206 | 0.184214 | 3.163317 | down | noncoding | NR_030717       | SNAPC2       | chr19 | + |
| ASHG19A3A012183 | 0.030912 | 0.20838  | 2.069286 | down | noncoding | uc002mlv.2      | AK097685     | chr19 | + |
| ASHG19A3A012255 | 0.002115 | 0.072257 | 22.79775 | down | noncoding | NR_027049       | ZNF788       | chr19 | + |
| ASHG19A3A012492 | 0.048324 | 0.250288 | 2.963188 | down | noncoding | CR608123        |              | chr19 | + |
| ASHG19A3A012595 | 0.02051  | 0.174085 | 14.71244 | down | noncoding | NR_029389       | LOC100134317 | chr19 | + |
| ASHG19A3A012742 | 0.009705 | 0.128705 | 2.355698 | down | noncoding | uc010eif.1      | AK311181     | chr19 | + |
| ASHG19A3A012742 | 0.009705 | 0.128705 | 2.355698 | down | noncoding | uc010eif.1      | AK311181     | chr19 | + |
| ASHG19A3A012742 | 0.009705 | 0.128705 | 2.355698 | down | noncoding | uc010eif.1      | AK311181     | chr19 | + |
| ASHG19A3A012742 | 0.009705 | 0.128705 | 2.355698 | down | noncoding | uc010eif.1      | AK311181     | chr19 | + |
| ASHG19A3A012742 | 0.009705 | 0.128705 | 2.355698 | down | noncoding | uc010eif.1      | AK311181     | chr19 | + |
| ASHG19A3A012742 | 0.009705 | 0.128705 | 2.355698 | down | noncoding | uc010eif.1      | AK311181     | chr19 | + |
| ASHG19A3A012742 | 0.009705 | 0.128705 | 2.355698 | down | noncoding | uc010eif.1      | AK311181     | chr19 | + |
| ASHG19A3A012742 | 0.009705 | 0.128705 | 2.355698 | down | noncoding | uc010eif.1      | AK311181     | chr19 | + |
| ASHG19A3A012742 | 0.009705 | 0.128705 | 2.355698 | down | noncoding | uc010eif.1      | AK311181     | chr19 | + |
| ASHG19A3A012829 | 0.04055  | 0.234961 | 4.169305 | down | noncoding | ENST00000503632 | AC011551.1   | chr19 | + |
| ASHG19A3A012995 | 0.029652 | 0.204946 | 2.866009 | down | noncoding | uc001hyk.1      | BC133032     | chr1  | - |
| ASHG19A3A013056 | 0.007179 | 0.113881 | 27.93711 | down | noncoding | ENST00000509804 | AC010327.1   | chr19 | + |
| ASHG19A3A013056 | 0.007179 | 0.113881 | 27.93711 | down | noncoding | ENST00000509804 | AC010327.1   | chr19 | + |
| ASHG19A3A013103 | 0.001575 | 0.065335 | 4.521599 | down | noncoding | uc002qnf.2      | BC110411     | chr19 | + |
| ASHG19A3A013156 | 0.030878 | 0.20838  | 3.932695 | down | noncoding | AK024582        |              | chr19 | + |
| ASHG19A3A013166 | 0.006077 | 0.106868 | 3.095311 | down | noncoding | uc002qse.2      | BC040926     | chr19 | + |
| ASHG19A3A013166 | 0.006077 | 0.106868 | 3.095311 | down | noncoding | uc002qse.2      | BC040926     | chr19 | + |
| ASHG19A3A013222 | 0.041395 | 0.236689 | 2.994889 | down | noncoding | uc002qyd.1      | BC113076     | chr2  | - |
| ASHG19A3A013222 | 0.041395 | 0.236689 | 2.994889 | down | noncoding | uc002qyd.1      | BC113076     | chr2  | - |
| ASHG19A3A013223 | 0.04773  | 0.249618 | 3.498675 | down | noncoding | ENST00000335179 | AC010907.3   | chr2  | - |
| ASHG19A3A013223 | 0.04773  | 0.249618 | 3.498675 | down | noncoding | ENST00000335179 | AC010907.3   | chr2  | - |
| ASHG19A3A013333 | 0.02065  | 0.174829 | 9.270667 | down | noncoding | U79271          |              | chr1  | - |
| ASHG19A3A013333 | 0.02065  | 0.174829 | 9.270667 | down | noncoding | U79271          |              | chr1  | - |

|                 |          |          |          |      |           |                 |               |      |   |
|-----------------|----------|----------|----------|------|-----------|-----------------|---------------|------|---|
| ASHG19A3A013333 | 0.02065  | 0.174829 | 9.270667 | down | noncoding | U79271          |               | chr1 | - |
| ASHG19A3A013333 | 0.02065  | 0.174829 | 9.270667 | down | noncoding | U79271          |               | chr1 | - |
| ASHG19A3A013336 | 0.01732  | 0.162668 | 29.33265 | down | noncoding | BC019085        |               | chr1 | - |
| ASHG19A3A013336 | 0.01732  | 0.162668 | 29.33265 | down | noncoding | BC019085        |               | chr1 | - |
| ASHG19A3A013336 | 0.01732  | 0.162668 | 29.33265 | down | noncoding | BC019085        |               | chr1 | - |
| ASHG19A3A013346 | 0.000489 | 0.045345 | 2.287773 | down | noncoding | ENST00000500120 | AC023137.2    | chr2 | - |
| ASHG19A3A013489 | 0.01372  | 0.14631  | 18.43    | down | noncoding | AF075027        |               | chr2 | - |
| ASHG19A3A013500 | 0.044479 | 0.242389 | 2.123935 | down | noncoding | ENST00000415722 | AC007390.4    | chr2 | - |
| ASHG19A3A013505 | 0.000103 | 0.030979 | 9.098105 | down | noncoding | AK055915        |               | chr2 | - |
| ASHG19A3A013536 | 0.000142 | 0.031585 | 3.714486 | down | noncoding | AK125406        |               | chr2 | - |
| ASHG19A3A013585 | 0.017762 | 0.165106 | 3.801989 | down | noncoding | BC087862        |               | chr2 | - |
| ASHG19A3A013604 | 0.015601 | 0.154374 | 3.198511 | down | noncoding | ENST00000444514 | AC006509.8    | chr2 | - |
| ASHG19A3A013715 | 0.038427 | 0.229658 | 2.204061 | down | noncoding | ENST00000428700 | RP11-511I11.1 | chr2 | - |
| ASHG19A3A013944 | 0.020019 | 0.17349  | 2.737409 | down | noncoding | AK054569        |               | chr2 | - |
| ASHG19A3A013979 | 0.026607 | 0.195313 | 3.159135 | down | noncoding | ENST00000398171 | AC133644.3    | chr2 | - |
| ASHG19A3A014010 | 0.025346 | 0.191965 | 2.697106 | down | noncoding | uc001abu.1      | AK056486      | chr1 | + |
| ASHG19A3A014040 | 0.003486 | 0.085407 | 11.00742 | down | noncoding | AK057592        |               | chr2 | - |
| ASHG19A3A014064 | 0.00864  | 0.122455 | 3.662216 | down | noncoding | ENST00000421314 | MTL1          | chr1 | - |
| ASHG19A3A014229 | 0.036207 | 0.223231 | 8.674489 | down | noncoding | uc002tjx.3      | AY343891      | chr2 | - |
| ASHG19A3A014232 | 0.042427 | 0.238285 | 2.025713 | down | noncoding | ENST00000416673 | RPL23AP7      | chr2 | - |
| ASHG19A3A014232 | 0.042427 | 0.238285 | 2.025713 | down | noncoding | ENST00000416673 | RPL23AP7      | chr2 | - |
| ASHG19A3A014246 | 0.003075 | 0.082215 | 2.174546 | down | noncoding | ENST00000446992 | AC068542.2    | chr2 | - |
| ASHG19A3A014246 | 0.003075 | 0.082215 | 2.174546 | down | noncoding | ENST00000446992 | AC068542.2    | chr2 | - |
| ASHG19A3A014325 | 0.001017 | 0.057323 | 3.071506 | down | noncoding | NR_026740       | LOC389033     | chr2 | - |
| ASHG19A3A014435 | 0.045414 | 0.244109 | 3.145097 | down | noncoding | D55639          |               | chr2 | - |
| ASHG19A3A014435 | 0.045414 | 0.244109 | 3.145097 | down | noncoding | D55639          |               | chr2 | - |
| ASHG19A3A014505 | 0.00994  | 0.129916 | 2.28808  | down | noncoding | ENST00000431457 | AC092662.2    | chr2 | - |
| ASHG19A3A014530 | 0.007328 | 0.114264 | 56.91847 | down | noncoding | ENST00000412746 | AC010093.2    | chr2 | - |
| ASHG19A3A014530 | 0.007328 | 0.114264 | 56.91847 | down | noncoding | ENST00000412746 | AC010093.2    | chr2 | - |
| ASHG19A3A014551 | 0.044024 | 0.241226 | 7.573611 | down | noncoding | uc002ubv.3      | BC073897      | chr2 | - |
| ASHG19A3A014552 | 0.042344 | 0.238285 | 10.53441 | down | noncoding | ENST00000482477 | AC009299.5    | chr2 | - |
| ASHG19A3A014625 | 0.033059 | 0.213573 | 2.125273 | down | noncoding | ENST00000442417 | AC093818.1    | chr2 | - |
| ASHG19A3A014625 | 0.033059 | 0.213573 | 2.125273 | down | noncoding | ENST00000442417 | AC093818.1    | chr2 | - |

|                 |          |          |          |      |           |                 |            |      |   |
|-----------------|----------|----------|----------|------|-----------|-----------------|------------|------|---|
| ASHG19A3A014625 | 0.033059 | 0.213573 | 2.125273 | down | noncoding | ENST00000442417 | AC093818.1 | chr2 | - |
| ASHG19A3A014636 | 0.0309   | 0.20838  | 2.865903 | down | noncoding | ENST00000440938 | AC073465.3 | chr2 | - |
| ASHG19A3A014668 | 0.026974 | 0.196393 | 9.081688 | down | noncoding | uc002ukq.2      | BC034000   | chr2 | - |
| ASHG19A3A014815 | 0.006784 | 0.112118 | 5.785222 | down | noncoding | AK096309        |            | chr2 | - |
| ASHG19A3A014997 | 0.000182 | 0.034555 | 3.662478 | down | noncoding | AF116702        |            | chr2 | - |
| ASHG19A3A014997 | 0.000182 | 0.034555 | 3.662478 | down | noncoding | AF116702        |            | chr2 | - |
| ASHG19A3A015058 | 0.001794 | 0.067636 | 3.088519 | down | noncoding | ENST00000430194 | AC079120.1 | chr2 | - |
| ASHG19A3A015117 | 0.036895 | 0.225596 | 2.225605 | down | noncoding | ENST00000441266 | AC068134.8 | chr2 | - |
| ASHG19A3A015118 | 0.035596 | 0.221947 | 3.14945  | down | noncoding | NR_028501       | ECEL1P2    | chr2 | - |
| ASHG19A3A015226 | 0.002173 | 0.072533 | 2.484464 | down | noncoding | ENST00000417267 | AC114730.7 | chr2 | - |
| ASHG19A3A015323 | 0.04063  | 0.235063 | 6.192812 | down | noncoding | ENST00000456674 | AC018463.4 | chr2 | + |
| ASHG19A3A015324 | 0.003057 | 0.082215 | 2.973678 | down | noncoding | ENST00000433548 | AC018463.5 | chr2 | + |
| ASHG19A3A015518 | 0.007491 | 0.114935 | 2.326994 | down | noncoding | AK125997        |            | chr2 | + |
| ASHG19A3A015519 | 0.003954 | 0.089575 | 2.11214  | down | noncoding | ENST00000438935 | AC007390.6 | chr2 | + |
| ASHG19A3A015598 | 0.01741  | 0.163163 | 2.013939 | down | noncoding | ENST00000423051 | AC012354.8 | chr2 | + |
| ASHG19A3A015618 | 0.012613 | 0.142131 | 2.669461 | down | noncoding | AK023940        |            | chr2 | + |
| ASHG19A3A015661 | 0.020279 | 0.174085 | 3.37092  | down | noncoding | NR_002229       | RPL23AP32  | chr2 | + |
| ASHG19A3A015807 | 0.001961 | 0.070296 | 3.054201 | down | noncoding | ENST00000437460 | AC007881.4 | chr2 | + |
| ASHG19A3A015882 | 0.036677 | 0.224917 | 3.358419 | down | noncoding | ENST00000417406 | AC109638.1 | chr2 | + |
| ASHG19A3A015904 | 0.001135 | 0.058346 | 2.70274  | down | noncoding | AL133438        |            | chr2 | + |
| ASHG19A3A015904 | 0.001135 | 0.058346 | 2.70274  | down | noncoding | AL133438        |            | chr2 | + |
| ASHG19A3A015904 | 0.001135 | 0.058346 | 2.70274  | down | noncoding | AL133438        |            | chr2 | + |
| ASHG19A3A015904 | 0.001135 | 0.058346 | 2.70274  | down | noncoding | AL133438        |            | chr2 | + |
| ASHG19A3A016022 | 0.006733 | 0.112118 | 7.0753   | down | noncoding | uc010yvb.1      | BC032409   | chr2 | + |
| ASHG19A3A016026 | 0.047885 | 0.249813 | 2.970673 | down | noncoding | uc002syc.1      | BC039374   | chr2 | + |
| ASHG19A3A016038 | 0.040397 | 0.234463 | 4.870813 | down | noncoding | ENST00000424783 | AC019097.7 | chr2 | + |
| ASHG19A3A016038 | 0.040397 | 0.234463 | 4.870813 | down | noncoding | ENST00000424783 | AC019097.7 | chr2 | + |
| ASHG19A3A016090 | 0.048061 | 0.250288 | 2.241573 | down | noncoding | ENST00000414265 | AC018880.2 | chr2 | + |
| ASHG19A3A016134 | 0.009879 | 0.129467 | 3.739757 | down | noncoding | ENST00000440793 | AC023672.1 | chr2 | + |
| ASHG19A3A016168 | 0.006822 | 0.112118 | 2.294043 | down | noncoding | ENST00000418944 | AC092664.1 | chr2 | + |
| ASHG19A3A016168 | 0.006822 | 0.112118 | 2.294043 | down | noncoding | ENST00000418944 | AC092664.1 | chr2 | + |
| ASHG19A3A016168 | 0.006822 | 0.112118 | 2.294043 | down | noncoding | ENST00000418944 | AC092664.1 | chr2 | + |
| ASHG19A3A016168 | 0.006822 | 0.112118 | 2.294043 | down | noncoding | ENST00000418944 | AC092664.1 | chr2 | + |

|                 |          |          |          |      |           |                 |               |       |   |
|-----------------|----------|----------|----------|------|-----------|-----------------|---------------|-------|---|
| ASHG19A3A016181 | 0.020141 | 0.174085 | 7.115367 | down | noncoding | ENST00000449539 | AC068491.3    | chr2  | + |
| ASHG19A3A016318 | 0.042114 | 0.238285 | 2.391559 | down | noncoding | ENST00000423267 | AC012306.2    | chr2  | + |
| ASHG19A3A016370 | 0.011291 | 0.136209 | 5.548814 | down | noncoding | ENST00000449922 | RHOQP2        | chr2  | + |
| ASHG19A3A016391 | 0.004851 | 0.098065 | 14.23489 | down | noncoding | uc002ttu.1      | BC008215      | chr2  | + |
| ASHG19A3A016391 | 0.004851 | 0.098065 | 14.23489 | down | noncoding | uc002ttu.1      | BC008215      | chr2  | + |
| ASHG19A3A016462 | 0.000372 | 0.042176 | 2.790123 | down | noncoding | ENST00000427218 | AC007394.2    | chr2  | + |
| ASHG19A3A016487 | 0.012927 | 0.143422 | 4.819317 | down | noncoding | ENST00000412323 | ATP5A1P2      | chr2  | + |
| ASHG19A3A016591 | 1.71E-05 | 0.014741 | 8.65126  | down | noncoding | ENST00000416361 | AC068039.4    | chr2  | + |
| ASHG19A3A016859 | 0.023094 | 0.183619 | 7.102555 | down | noncoding | ENST00000451828 | RP11-108M9.3  | chr1  | + |
| ASHG19A3A016885 | 0.018221 | 0.166565 | 2.25137  | down | noncoding | ENST00000430494 | AC007879.7    | chr2  | + |
| ASHG19A3A016902 | 0.00207  | 0.071625 | 2.129033 | down | noncoding | ENST00000416092 | AC013409.3    | chr2  | + |
| ASHG19A3A017025 | 0.006899 | 0.112625 | 2.527661 | down | noncoding | uc002vms.1      | AX747413      | chr2  | + |
| ASHG19A3A017042 | 0.029735 | 0.205052 | 2.493746 | down | noncoding | ENST00000446594 | AC012512.1    | chr2  | + |
| ASHG19A3A017050 | 0.011037 | 0.135071 | 2.95069  | down | noncoding | G36718          |               | chr2  | + |
| ASHG19A3A017061 | 0.031243 | 0.208947 | 2.557795 | down | noncoding | ENST00000427790 | AC007677.1    | chr2  | + |
| ASHG19A3A017163 | 0.016042 | 0.155694 | 4.247936 | down | noncoding | ENST00000437898 | RP1-43E13.2   | chr1  | + |
| ASHG19A3A017163 | 0.016042 | 0.155694 | 4.247936 | down | noncoding | ENST00000437898 | RP1-43E13.2   | chr1  | + |
| ASHG19A3A017208 | 0.013164 | 0.144636 | 2.243787 | down | noncoding | AF116718        |               | chr2  | + |
| ASHG19A3A017208 | 0.013164 | 0.144636 | 2.243787 | down | noncoding | AF116718        |               | chr2  | + |
| ASHG19A3A017233 | 0.012437 | 0.141895 | 2.132583 | down | noncoding | ENST00000442637 | RP5-1103G7.4  | chr20 | - |
| ASHG19A3A017233 | 0.012437 | 0.141895 | 2.132583 | down | noncoding | ENST00000442637 | RP5-1103G7.4  | chr20 | - |
| ASHG19A3A017346 | 0.014216 | 0.147861 | 2.654346 | down | noncoding | AK057535        |               | chr1  | + |
| ASHG19A3A017346 | 0.014216 | 0.147861 | 2.654346 | down | noncoding | AK057535        |               | chr1  | + |
| ASHG19A3A017346 | 0.014216 | 0.147861 | 2.654346 | down | noncoding | AK057535        |               | chr1  | + |
| ASHG19A3A017346 | 0.014216 | 0.147861 | 2.654346 | down | noncoding | AK057535        |               | chr1  | + |
| ASHG19A3A017431 | 0.038113 | 0.228969 | 3.492784 | down | noncoding | ENST00000445304 | RPL17P1       | chr20 | - |
| ASHG19A3A017463 | 0.013822 | 0.146497 | 6.601245 | down | noncoding | ENST00000396692 | CYB5P4        | chr20 | - |
| ASHG19A3A017645 | 0.003055 | 0.082215 | 9.207128 | down | noncoding | ENST00000423261 | GLRXP         | chr20 | - |
| ASHG19A3A017672 | 0.000837 | 0.053973 | 3.407851 | down | noncoding | ENST00000432563 | RP5-1121H13.1 | chr20 | - |
| ASHG19A3A017722 | 0.010496 | 0.132365 | 3.825801 | down | noncoding | ENST00000440968 | HNRPA1P3      | chr20 | - |
| ASHG19A3A017853 | 0.008536 | 0.122132 | 2.726115 | down | noncoding | Z70769          |               | chr20 | - |
| ASHG19A3A017853 | 0.008536 | 0.122132 | 2.726115 | down | noncoding | Z70769          |               | chr20 | - |
| ASHG19A3A017853 | 0.008536 | 0.122132 | 2.726115 | down | noncoding | Z70769          |               | chr20 | - |

|                 |          |          |          |      |           |                 |               |       |   |
|-----------------|----------|----------|----------|------|-----------|-----------------|---------------|-------|---|
| ASHG19A3A017853 | 0.008536 | 0.122132 | 2.726115 | down | noncoding | Z70769          |               | chr20 | - |
| ASHG19A3A017853 | 0.008536 | 0.122132 | 2.726115 | down | noncoding | Z70769          |               | chr20 | - |
| ASHG19A3A017853 | 0.008536 | 0.122132 | 2.726115 | down | noncoding | Z70769          |               | chr20 | - |
| ASHG19A3A017853 | 0.008536 | 0.122132 | 2.726115 | down | noncoding | Z70769          |               | chr20 | - |
| ASHG19A3A018234 | 0.011426 | 0.137292 | 4.047805 | down | noncoding | ENST00000425307 | RP5-1125A11.5 | chr20 | + |
| ASHG19A3A018253 | 0.002797 | 0.080655 | 4.02102  | down | noncoding | ENST00000421424 | C20orf127     | chr20 | + |
| ASHG19A3A018277 | 0.00073  | 0.051923 | 36.35272 | down | noncoding | AK130977        |               | chr20 | + |
| ASHG19A3A018501 | 0.014312 | 0.148139 | 7.823103 | down | noncoding | ENST00000439558 | RP5-907D15.2  | chr20 | + |
| ASHG19A3A018826 | 0.021228 | 0.176853 | 8.2489   | down | noncoding | AK095069        |               | chr21 | - |
| ASHG19A3A018826 | 0.021228 | 0.176853 | 8.2489   | down | noncoding | AK095069        |               | chr21 | - |
| ASHG19A3A018826 | 0.021228 | 0.176853 | 8.2489   | down | noncoding | AK095069        |               | chr21 | - |
| ASHG19A3A018848 | 0.007048 | 0.113157 | 7.778324 | down | noncoding | ENST00000432988 | AP000689.8    | chr21 | - |
| ASHG19A3A018873 | 0.042565 | 0.238285 | 2.171538 | down | noncoding | ENST00000423089 | AP001434.1    | chr21 | - |
| ASHG19A3A018957 | 0.00049  | 0.045345 | 19.21256 | down | noncoding | ENST00000449877 | MYL6P         | chr21 | - |
| ASHG19A3A019036 | 0.000159 | 0.032748 | 14.55338 | down | noncoding | ENST00000332473 | FGF7P2        | chr21 | + |
| ASHG19A3A019090 | 0.03746  | 0.227009 | 2.954595 | down | noncoding | ENST00000414214 | FDPSP         | chr21 | + |
| ASHG19A3A019100 | 0.006311 | 0.10895  | 2.22675  | down | noncoding | ENST00000425213 | EEF1A1P       | chr21 | + |
| ASHG19A3A019152 | 0.015648 | 0.154374 | 2.561177 | down | noncoding | ENST00000458495 | TPT1P         | chr21 | + |
| ASHG19A3A019175 | 0.00429  | 0.093118 | 2.066616 | down | noncoding | DQ655932        |               | chr21 | + |
| ASHG19A3A019322 | 0.023301 | 0.184707 | 2.224949 | down | noncoding | uc002zdzj.1     | DQ577420      | chr21 | + |
| ASHG19A3A019363 | 0.049594 | 0.252234 | 2.514907 | down | noncoding | NR_027673       | ADARB1        | chr21 | + |
| ASHG19A3A019363 | 0.049594 | 0.252234 | 2.514907 | down | noncoding | NR_027673       | ADARB1        | chr21 | + |
| ASHG19A3A019363 | 0.049594 | 0.252234 | 2.514907 | down | noncoding | NR_027673       | ADARB1        | chr21 | + |
| ASHG19A3A019363 | 0.049594 | 0.252234 | 2.514907 | down | noncoding | NR_027673       | ADARB1        | chr21 | + |
| ASHG19A3A019378 | 0.01172  | 0.138492 | 4.238784 | down | noncoding | ENST00000451618 | AP001476.2    | chr21 | + |
| ASHG19A3A019402 | 0.013513 | 0.145745 | 2.255067 | down | noncoding | ENST00000427757 | RPL23AP4      | chr21 | + |
| ASHG19A3A019766 | 0.000278 | 0.03759  | 6.923479 | down | noncoding | ENST00000447905 | CITF22-45C1.3 | chr22 | - |
| ASHG19A3A019811 | 0.010571 | 0.132404 | 2.070328 | down | noncoding | uc003awd.2      | BC036921      | chr22 | - |
| ASHG19A3A019811 | 0.010571 | 0.132404 | 2.070328 | down | noncoding | uc003awd.2      | BC036921      | chr22 | - |
| ASHG19A3A019811 | 0.010571 | 0.132404 | 2.070328 | down | noncoding | uc003awd.2      | BC036921      | chr22 | - |
| ASHG19A3A020180 | 0.023781 | 0.185665 | 4.890538 | down | noncoding | ENST00000438037 | ASH2LP1       | chr22 | + |
| ASHG19A3A020193 | 0.042615 | 0.238285 | 4.115841 | down | noncoding | ENST00000415639 | AP000361.2    | chr22 | + |
| ASHG19A3A020292 | 0.026004 | 0.193525 | 2.120453 | down | noncoding | ENST00000437933 | FTHL1         | chr1  | + |

|                 |          |          |          |      |           |                 |                |       |   |
|-----------------|----------|----------|----------|------|-----------|-----------------|----------------|-------|---|
| ASHG19A3A020380 | 0.012448 | 0.141895 | 17.43706 | down | noncoding | ENST00000414048 | CTA-714B7.4    | chr22 | + |
| ASHG19A3A020450 | 0.049164 | 0.25214  | 2.708272 | down | noncoding | ENST00000418803 | RP3-508I15.19  | chr22 | + |
| ASHG19A3A020450 | 0.049164 | 0.25214  | 2.708272 | down | noncoding | ENST00000418803 | RP3-508I15.19  | chr22 | + |
| ASHG19A3A020450 | 0.049164 | 0.25214  | 2.708272 | down | noncoding | ENST00000418803 | RP3-508I15.19  | chr22 | + |
| ASHG19A3A020525 | 0.004711 | 0.096398 | 3.616907 | down | noncoding | NR_027786       | SERHL          | chr22 | + |
| ASHG19A3A020662 | 0.042076 | 0.238285 | 6.129087 | down | noncoding | ENST00000497982 | RP1-144F13.4   | chr1  | + |
| ASHG19A3A020687 | 0.047096 | 0.248623 | 2.022526 | down | noncoding | ENST00000418255 | RP1-118J21.5   | chr1  | + |
| ASHG19A3A020687 | 0.047096 | 0.248623 | 2.022526 | down | noncoding | ENST00000418255 | RP1-118J21.5   | chr1  | + |
| ASHG19A3A020693 | 0.001749 | 0.06735  | 2.307896 | down | noncoding | NR_002786       | CIDECP         | chr3  | - |
| ASHG19A3A020693 | 0.001749 | 0.06735  | 2.307896 | down | noncoding | NR_002786       | CIDECP         | chr3  | - |
| ASHG19A3A020694 | 0.001391 | 0.06264  | 2.502995 | down | noncoding | ENST00000432401 | CIDECP         | chr3  | - |
| ASHG19A3A020694 | 0.001391 | 0.06264  | 2.502995 | down | noncoding | ENST00000432401 | CIDECP         | chr3  | - |
| ASHG19A3A020721 | 0.002354 | 0.074687 | 9.654985 | down | noncoding | uc003bwp.1      | NR_003112      | chr3  | - |
| ASHG19A3A020789 | 0.009773 | 0.129005 | 2.006482 | down | noncoding | ENST00000417487 | AC104297.2     | chr3  | - |
| ASHG19A3A020827 | 0.02163  | 0.178416 | 2.249533 | down | noncoding | ENST00000426040 | AC098614.1     | chr3  | - |
| ASHG19A3A020853 | 0.032587 | 0.212573 | 7.605163 | down | noncoding | ENST00000451877 | AC104306.4     | chr3  | - |
| ASHG19A3A020867 | 0.043776 | 0.240512 | 2.175925 | down | noncoding | CR622191        |                | chr3  | - |
| ASHG19A3A020867 | 0.043776 | 0.240512 | 2.175925 | down | noncoding | CR622191        |                | chr3  | - |
| ASHG19A3A020868 | 0.037948 | 0.228356 | 2.514679 | down | noncoding | G43299          |                | chr3  | - |
| ASHG19A3A020868 | 0.037948 | 0.228356 | 2.514679 | down | noncoding | G43299          |                | chr3  | - |
| ASHG19A3A020938 | 0.003804 | 0.088847 | 5.090117 | down | noncoding | ENST00000438017 | RP4-613B23.1   | chr3  | - |
| ASHG19A3A020938 | 0.003804 | 0.088847 | 5.090117 | down | noncoding | ENST00000438017 | RP4-613B23.1   | chr3  | - |
| ASHG19A3A020973 | 0.027532 | 0.198387 | 3.336636 | down | noncoding | ENST00000425889 | RP11-852E15.1  | chr3  | - |
| ASHG19A3A021015 | 0.038466 | 0.229658 | 5.374559 | down | noncoding | ENST00000444020 | RP11-1029M24.1 | chr3  | - |
| ASHG19A3A021028 | 0.024203 | 0.186855 | 2.831341 | down | noncoding | HIT000086181    |                | chr3  | - |
| ASHG19A3A021028 | 0.024203 | 0.186855 | 2.831341 | down | noncoding | HIT000086181    |                | chr3  | - |
| ASHG19A3A021028 | 0.024203 | 0.186855 | 2.831341 | down | noncoding | HIT000086181    |                | chr3  | - |
| ASHG19A3A021028 | 0.024203 | 0.186855 | 2.831341 | down | noncoding | HIT000086181    |                | chr3  | - |
| ASHG19A3A021095 | 0.010283 | 0.131219 | 5.509587 | down | noncoding | ENST00000439215 | ATP6V1E1P1     | chr1  | + |
| ASHG19A3A021270 | 0.008913 | 0.124411 | 2.397999 | down | noncoding | ENST00000487255 | RP11-803B1.3   | chr3  | - |
| ASHG19A3A021271 | 0.004537 | 0.09544  | 2.513867 | down | noncoding | ENST00000462675 | RP11-803B1.7   | chr3  | - |
| ASHG19A3A021320 | 0.023318 | 0.184707 | 3.166499 | down | noncoding | ENST00000491722 | RP11-778P17.2  | chr3  | - |
| ASHG19A3A021320 | 0.023318 | 0.184707 | 3.166499 | down | noncoding | ENST00000491722 | RP11-778P17.2  | chr3  | - |

|                 |          |          |          |      |           |                 |               |      |   |
|-----------------|----------|----------|----------|------|-----------|-----------------|---------------|------|---|
| ASHG19A3A021320 | 0.023318 | 0.184707 | 3.166499 | down | noncoding | ENST00000491722 | RP11-778P17.2 | chr3 | - |
| ASHG19A3A021320 | 0.023318 | 0.184707 | 3.166499 | down | noncoding | ENST00000491722 | RP11-778P17.2 | chr3 | - |
| ASHG19A3A021337 | 0.020364 | 0.174085 | 2.846528 | down | noncoding | ENST00000444386 | RP11-506B15.6 | chr1 | + |
| ASHG19A3A021337 | 0.020364 | 0.174085 | 2.846528 | down | noncoding | ENST00000444386 | RP11-506B15.6 | chr1 | + |
| ASHG19A3A021370 | 0.000735 | 0.051923 | 7.232469 | down | noncoding | NR_028303       | LOC100302640  | chr3 | - |
| ASHG19A3A021371 | 0.005761 | 0.104491 | 3.954788 | down | noncoding | ENST00000477210 | RP11-280F2.2  | chr3 | - |
| ASHG19A3A021436 | 0.022631 | 0.182257 | 2.249054 | down | noncoding | ENST00000465850 | RP11-274J15.2 | chr3 | - |
| ASHG19A3A021438 | 0.001549 | 0.06482  | 3.824534 | down | noncoding | ENST00000473625 | RP11-553L6.3  | chr3 | - |
| ASHG19A3A021495 | 0.021678 | 0.178416 | 8.293546 | down | noncoding | BC033713        |               | chr3 | - |
| ASHG19A3A021511 | 0.022607 | 0.182257 | 3.340554 | down | noncoding | ENST00000468859 | RP11-379B18.5 | chr3 | - |
| ASHG19A3A021552 | 0.013099 | 0.14434  | 5.562556 | down | noncoding | ENST00000480365 | RP11-722C17.1 | chr3 | - |
| ASHG19A3A021650 | 0.003904 | 0.089011 | 4.027526 | down | noncoding | G43503          |               | chr3 | - |
| ASHG19A3A021650 | 0.003904 | 0.089011 | 4.027526 | down | noncoding | G43503          |               | chr3 | - |
| ASHG19A3A021650 | 0.003904 | 0.089011 | 4.027526 | down | noncoding | G43503          |               | chr3 | - |
| ASHG19A3A021926 | 0.003686 | 0.08774  | 6.67303  | down | noncoding | ENST00000490941 | KLF7P1        | chr3 | - |
| ASHG19A3A022009 | 0.023399 | 0.184707 | 2.274875 | down | noncoding | ENST00000426289 | RP4-533D7.3   | chr1 | + |
| ASHG19A3A022009 | 0.023399 | 0.184707 | 2.274875 | down | noncoding | ENST00000426289 | RP4-533D7.3   | chr1 | + |
| ASHG19A3A022071 | 0.011683 | 0.138492 | 4.985112 | down | noncoding | HIT000097222    |               | chr3 | - |
| ASHG19A3A022172 | 0.04455  | 0.242635 | 3.025626 | down | noncoding | ENST00000452862 | AC144530.1    | chr3 | - |
| ASHG19A3A022386 | 0.008259 | 0.120896 | 3.454973 | down | noncoding | ENST00000368528 | AC098614.2    | chr3 | + |
| ASHG19A3A022428 | 0.012192 | 0.141008 | 2.896711 | down | noncoding | NR_027868       | PDCD6IP       | chr3 | + |
| ASHG19A3A022428 | 0.012192 | 0.141008 | 2.896711 | down | noncoding | NR_027868       | PDCD6IP       | chr3 | + |
| ASHG19A3A022470 | 0.000129 | 0.031585 | 5.155115 | down | noncoding | ENST00000399472 | RP11-331G2.4  | chr3 | + |
| ASHG19A3A022479 | 0.015144 | 0.152727 | 4.624481 | down | noncoding | ENST00000413128 | RP11-420K5.1  | chr3 | + |
| ASHG19A3A022518 | 0.00312  | 0.082215 | 3.359555 | down | noncoding | AF007132        |               | chr3 | + |
| ASHG19A3A022524 | 0.003155 | 0.082688 | 41.79669 | down | noncoding | AB074163        |               | chr1 | + |
| ASHG19A3A022785 | 0.001348 | 0.062273 | 2.016172 | down | noncoding | ENST00000482368 | CTD-2013N24.2 | chr3 | + |
| ASHG19A3A022785 | 0.001348 | 0.062273 | 2.016172 | down | noncoding | ENST00000482368 | CTD-2013N24.2 | chr3 | + |
| ASHG19A3A022830 | 0.003467 | 0.085214 | 5.796337 | down | noncoding | ENST00000476047 | RP11-550F7.1  | chr3 | + |
| ASHG19A3A022844 | 0.006606 | 0.11122  | 3.193001 | down | noncoding | ENST00000427917 | RP5-866L20.3  | chr1 | + |
| ASHG19A3A022924 | 0.000833 | 0.053939 | 10.70153 | down | noncoding | ENST00000486325 | RP11-15N24.3  | chr3 | + |
| ASHG19A3A022949 | 0.023389 | 0.184707 | 4.036379 | down | noncoding | ENST00000457291 | RP11-238M12.1 | chr3 | + |
| ASHG19A3A022960 | 0.02672  | 0.195728 | 2.718451 | down | noncoding | AK055934        |               | chr3 | + |

|                 |          |          |          |      |           |                 |               |      |   |
|-----------------|----------|----------|----------|------|-----------|-----------------|---------------|------|---|
| ASHG19A3A022961 | 0.008877 | 0.124348 | 5.065429 | down | noncoding | NR_028301       | LOC344595     | chr3 | + |
| ASHG19A3A022962 | 0.018122 | 0.166283 | 3.693568 | down | noncoding | uc003dwh.1      | AX747913      | chr3 | + |
| ASHG19A3A023100 | 0.042458 | 0.238285 | 2.005134 | down | noncoding | NR_024618       | LOC100129550  | chr3 | + |
| ASHG19A3A023182 | 0.006677 | 0.111795 | 2.000593 | down | noncoding | NR_026991       | C3orf47       | chr3 | + |
| ASHG19A3A023234 | 0.019712 | 0.17243  | 3.395176 | down | noncoding | ENST00000502370 | RP11-79L21.1  | chr3 | + |
| ASHG19A3A023287 | 0.014214 | 0.147861 | 3.180287 | down | noncoding | ENST00000495704 | RP11-117F22.2 | chr3 | + |
| ASHG19A3A023293 | 0.013483 | 0.145745 | 2.843697 | down | noncoding | ENST00000515247 | RP11-319G6.1  | chr3 | + |
| ASHG19A3A023293 | 0.013483 | 0.145745 | 2.843697 | down | noncoding | ENST00000515247 | RP11-319G6.1  | chr3 | + |
| ASHG19A3A023293 | 0.013483 | 0.145745 | 2.843697 | down | noncoding | ENST00000515247 | RP11-319G6.1  | chr3 | + |
| ASHG19A3A023293 | 0.013483 | 0.145745 | 2.843697 | down | noncoding | ENST00000515247 | RP11-319G6.1  | chr3 | + |
| ASHG19A3A023293 | 0.013483 | 0.145745 | 2.843697 | down | noncoding | ENST00000515247 | RP11-319G6.1  | chr3 | + |
| ASHG19A3A023293 | 0.013483 | 0.145745 | 2.843697 | down | noncoding | ENST00000515247 | RP11-319G6.1  | chr3 | + |
| ASHG19A3A023293 | 0.013483 | 0.145745 | 2.843697 | down | noncoding | ENST00000515247 | RP11-319G6.1  | chr3 | + |
| ASHG19A3A023415 | 0.041389 | 0.236689 | 2.894329 | down | noncoding | ENST00000488408 | RP11-217E22.1 | chr3 | + |
| ASHG19A3A023534 | 0.026419 | 0.195017 | 2.858395 | down | noncoding | ENST00000420943 | RP11-263C16.2 | chr3 | + |
| ASHG19A3A023615 | 0.036037 | 0.223195 | 2.284452 | down | noncoding | ENST00000474767 | RP11-14I2.2   | chr3 | + |
| ASHG19A3A023713 | 0.021799 | 0.178806 | 2.601071 | down | noncoding | AK055652        |               | chr3 | + |
| ASHG19A3A023713 | 0.021799 | 0.178806 | 2.601071 | down | noncoding | AK055652        |               | chr3 | + |
| ASHG19A3A023791 | 0.022667 | 0.182365 | 5.099007 | down | noncoding | ENST00000442855 | RP11-182I10.1 | chr1 | + |
| ASHG19A3A023802 | 0.007497 | 0.114935 | 2.813463 | down | noncoding | ENST00000392362 | AC073135.2    | chr3 | + |
| ASHG19A3A023823 | 0.008311 | 0.121096 | 2.799468 | down | noncoding | AK130823        |               | chr4 | - |
| ASHG19A3A023978 | 0.013194 | 0.144754 | 3.000481 | down | noncoding | G36472          |               | chr4 | - |
| ASHG19A3A023993 | 0.046999 | 0.248431 | 2.554655 | down | noncoding | ENST00000485777 | RP11-333E5.1  | chr4 | - |
| ASHG19A3A024063 | 0.047961 | 0.249942 | 4.249107 | down | noncoding | ENST00000514630 | RP11-640B6.1  | chr4 | - |
| ASHG19A3A024159 | 0.048629 | 0.25108  | 3.214049 | down | noncoding | ENST00000513630 | RP11-317G22.1 | chr4 | - |
| ASHG19A3A024240 | 0.00861  | 0.122339 | 2.305121 | down | noncoding | ENST00000513351 | RP11-63H19.6  | chr4 | - |
| ASHG19A3A024245 | 0.023638 | 0.18529  | 2.924402 | down | noncoding | NR_023916       | PIN1L         | chr1 | + |
| ASHG19A3A024325 | 0.002125 | 0.072257 | 5.101989 | down | noncoding | ENST00000502804 | RP11-88J6.1   | chr4 | - |
| ASHG19A3A024382 | 0.029433 | 0.204315 | 3.424427 | down | noncoding | ENST00000505767 | RP11-777B9.3  | chr4 | - |
| ASHG19A3A024385 | 0.00315  | 0.082688 | 7.783318 | down | noncoding | ENST00000509878 | RP11-792D21.1 | chr4 | - |
| ASHG19A3A024393 | 0.008841 | 0.124101 | 21.56271 | down | noncoding | CR612147        |               | chr4 | - |
| ASHG19A3A024567 | 0.007283 | 0.113938 | 4.160033 | down | noncoding | ENST00000505438 | AC004069.1    | chr4 | - |
| ASHG19A3A024572 | 0.023748 | 0.185665 | 2.650154 | down | noncoding | ENST00000501580 | AC004066.1    | chr4 | - |



|                 |          |          |          |      |           |                 |               |      |   |
|-----------------|----------|----------|----------|------|-----------|-----------------|---------------|------|---|
| ASHG19A3A024613 | 0.012839 | 0.143152 | 4.246755 | down | noncoding | ENST00000503770 | RP11-433B3.1  | chr4 | - |
| ASHG19A3A024649 | 0.048631 | 0.25108  | 12.04387 | down | noncoding | CR601629        |               | chr4 | - |
| ASHG19A3A024660 | 0.04464  | 0.242654 | 3.36297  | down | noncoding | ENST00000505994 | RP11-548H18.2 | chr4 | - |
| ASHG19A3A024788 | 0.034332 | 0.217476 | 3.99438  | down | noncoding | AK001013        |               | chr4 | - |
| ASHG19A3A024871 | 0.042556 | 0.238285 | 2.556731 | down | noncoding | ENST00000393938 | ANXA2P1       | chr4 | - |
| ASHG19A3A024871 | 0.042556 | 0.238285 | 2.556731 | down | noncoding | ENST00000393938 | ANXA2P1       | chr4 | - |
| ASHG19A3A024958 | 0.007565 | 0.115351 | 5.649623 | down | noncoding | ENST00000425922 | ADH5P2        | chr1 | + |
| ASHG19A3A024984 | 0.044572 | 0.242635 | 2.369627 | down | noncoding | ENST00000515331 | RP11-213L8.1  | chr4 | - |
| ASHG19A3A025052 | 0.031608 | 0.209869 | 2.150953 | down | noncoding | NR_024008       | C4orf38       | chr4 | - |
| ASHG19A3A025061 | 0.011095 | 0.135071 | 8.172324 | down | noncoding | ENST00000503948 | RP11-162O12.2 | chr4 | - |
| ASHG19A3A025173 | 0.046536 | 0.247406 | 2.584371 | down | noncoding | ENST00000509843 | RP11-478C1.3  | chr4 | + |
| ASHG19A3A025365 | 0.010667 | 0.132734 | 4.104628 | down | noncoding | ENST00000506450 | RP11-302F12.2 | chr4 | + |
| ASHG19A3A025438 | 0.023516 | 0.185273 | 2.291263 | down | noncoding | ENST00000447415 | RP4-612B15.2  | chr1 | + |
| ASHG19A3A025565 | 0.001604 | 0.065366 | 6.88057  | down | noncoding | ENST00000489235 | RP11-25L5.1   | chr4 | + |
| ASHG19A3A025580 | 0.019524 | 0.171886 | 2.349331 | down | noncoding | ENST00000514397 | RP11-63H19.1  | chr4 | + |
| ASHG19A3A025603 | 0.004966 | 0.098474 | 3.537666 | down | noncoding | ENST00000294916 | RP11-4I17.1   | chr4 | + |
| ASHG19A3A025736 | 0.005549 | 0.102884 | 6.434039 | down | noncoding | ENST00000512222 | RP11-263F19.1 | chr4 | + |
| ASHG19A3A025762 | 0.018808 | 0.168175 | 2.435052 | down | noncoding | ENST00000415545 | HSP90B3P      | chr1 | + |
| ASHG19A3A025825 | 0.006047 | 0.106589 | 5.614554 | down | noncoding | ENST00000399181 | FAM177A2      | chr4 | + |
| ASHG19A3A025877 | 0.027787 | 0.199204 | 2.816616 | down | noncoding | G36724          |               | chr4 | + |
| ASHG19A3A025889 | 0.015185 | 0.152759 | 2.423603 | down | noncoding | ENST00000500526 | AC004051.2    | chr4 | + |
| ASHG19A3A025889 | 0.015185 | 0.152759 | 2.423603 | down | noncoding | ENST00000500526 | AC004051.2    | chr4 | + |
| ASHG19A3A026190 | 0.026545 | 0.195066 | 3.534843 | down | noncoding | ENST00000506966 | RP11-21G20.1  | chr4 | + |
| ASHG19A3A026254 | 0.031307 | 0.208947 | 10.78878 | down | noncoding | ENST00000509378 | RP11-39C10.1  | chr4 | + |
| ASHG19A3A026307 | 0.01999  | 0.173343 | 3.834238 | down | noncoding | ENST00000439625 | RP4-736I12.1  | chr1 | + |
| ASHG19A3A026334 | 0.019196 | 0.16989  | 4.058234 | down | noncoding | BC063870        |               | chr4 | + |
| ASHG19A3A026355 | 0.036307 | 0.223527 | 5.488152 | down | noncoding | ENST00000514910 | RP11-451F20.1 | chr4 | + |
| ASHG19A3A026376 | 0.025179 | 0.191284 | 2.495069 | down | noncoding | ENST00000448700 | RP4-672J20.1  | chr1 | + |
| ASHG19A3A026403 | 0.020313 | 0.174085 | 2.266451 | down | noncoding | ENST00000393497 | RP11-713C19.2 | chr4 | + |
| ASHG19A3A026472 | 0.020156 | 0.174085 | 2.155375 | down | noncoding | ENST00000510731 | RP11-692C23.1 | chr5 | - |
| ASHG19A3A026568 | 1.27E-08 | 0.00019  | 2.796743 | down | noncoding | NR_027253       | LOC285696     | chr5 | - |
| ASHG19A3A026656 | 0.027505 | 0.198387 | 12.77906 | down | noncoding | AK001058        |               | chr5 | - |
| ASHG19A3A026804 | 0.008075 | 0.119838 | 7.627451 | down | noncoding | ENST00000503994 | RP11-175M2.1  | chr5 | - |

|                 |          |          |          |      |           |                 |               |      |   |
|-----------------|----------|----------|----------|------|-----------|-----------------|---------------|------|---|
| ASHG19A3A026804 | 0.008075 | 0.119838 | 7.627451 | down | noncoding | ENST00000503994 | RP11-175M2.1  | chr5 | - |
| ASHG19A3A026804 | 0.008075 | 0.119838 | 7.627451 | down | noncoding | ENST00000503994 | RP11-175M2.1  | chr5 | - |
| ASHG19A3A026806 | 0.000451 | 0.044913 | 9.097064 | down | noncoding | uc003jqp.2      | BC071555      | chr5 | - |
| ASHG19A3A026806 | 0.000451 | 0.044913 | 9.097064 | down | noncoding | uc003jqp.2      | BC071555      | chr5 | - |
| ASHG19A3A026806 | 0.000451 | 0.044913 | 9.097064 | down | noncoding | uc003jqp.2      | BC071555      | chr5 | - |
| ASHG19A3A026852 | 0.020483 | 0.174085 | 3.658369 | down | noncoding | ENST00000506094 | CTD-2244C20.1 | chr5 | - |
| ASHG19A3A026908 | 0.021726 | 0.178416 | 3.478669 | down | noncoding | NR_024438       | LOC648740     | chr1 | + |
| ASHG19A3A026960 | 0.000199 | 0.034555 | 4.27293  | down | noncoding | ENST00000511329 | CTC-366B18.2  | chr5 | - |
| ASHG19A3A027006 | 0.038933 | 0.230384 | 2.625516 | down | noncoding | ENST00000419651 | RP11-123D12.1 | chr1 | + |
| ASHG19A3A027032 | 0.036916 | 0.225596 | 4.066395 | down | noncoding | ENST00000505694 | CTC-459I6.1   | chr5 | - |
| ASHG19A3A027223 | 0.049189 | 0.25214  | 2.578624 | down | noncoding | ENST00000505795 | CTD-2367A17.2 | chr5 | - |
| ASHG19A3A027285 | 0.037527 | 0.227009 | 2.536195 | down | noncoding | ENST00000505780 | CTD-2158P22.4 | chr5 | - |
| ASHG19A3A027361 | 0.020268 | 0.174085 | 2.392981 | down | noncoding | ENST00000414070 | RP11-20O24.4  | chr1 | + |
| ASHG19A3A027361 | 0.020268 | 0.174085 | 2.392981 | down | noncoding | ENST00000414070 | RP11-20O24.4  | chr1 | + |
| ASHG19A3A027361 | 0.020268 | 0.174085 | 2.392981 | down | noncoding | ENST00000414070 | RP11-20O24.4  | chr1 | + |
| ASHG19A3A027437 | 0.037093 | 0.226461 | 2.81316  | down | noncoding | NR_026763       | SMAD5OS       | chr5 | - |
| ASHG19A3A027437 | 0.037093 | 0.226461 | 2.81316  | down | noncoding | NR_026763       | SMAD5OS       | chr5 | - |
| ASHG19A3A027437 | 0.037093 | 0.226461 | 2.81316  | down | noncoding | NR_026763       | SMAD5OS       | chr5 | - |
| ASHG19A3A027516 | 0.006812 | 0.112118 | 3.82943  | down | noncoding | G42992          |               | chr5 | - |
| ASHG19A3A027516 | 0.006812 | 0.112118 | 3.82943  | down | noncoding | G42992          |               | chr5 | - |
| ASHG19A3A027516 | 0.006812 | 0.112118 | 3.82943  | down | noncoding | G42992          |               | chr5 | - |
| ASHG19A3A027516 | 0.006812 | 0.112118 | 3.82943  | down | noncoding | G42992          |               | chr5 | - |
| ASHG19A3A027516 | 0.006812 | 0.112118 | 3.82943  | down | noncoding | G42992          |               | chr5 | - |
| ASHG19A3A027516 | 0.006812 | 0.112118 | 3.82943  | down | noncoding | G42992          |               | chr5 | - |
| ASHG19A3A027516 | 0.006812 | 0.112118 | 3.82943  | down | noncoding | G42992          |               | chr5 | - |
| ASHG19A3A027661 | 0.003643 | 0.087309 | 18.86381 | down | noncoding | ENST00000309178 | GLRXP3        | chr5 | - |
| ASHG19A3A027808 | 0.003218 | 0.083261 | 6.50671  | down | noncoding | AK054653        |               | chr5 | - |
| ASHG19A3A027843 | 0.019983 | 0.173343 | 2.255969 | down | noncoding | uc011cly.1      | BC013821      | chr5 | + |
| ASHG19A3A028035 | 0.014412 | 0.148615 | 3.094103 | down | noncoding | ENST00000438995 | CTD-2138O14.1 | chr5 | + |
| ASHG19A3A028233 | 0.035906 | 0.223117 | 3.977179 | down | noncoding | ENST00000467688 | RPL17P22      | chr5 | + |
| ASHG19A3A028260 | 0.032815 | 0.212892 | 2.729314 | down | noncoding | ENST00000509515 | CTD-2085F10.1 | chr5 | + |
| ASHG19A3A028260 | 0.032815 | 0.212892 | 2.729314 | down | noncoding | ENST00000509515 | CTD-2085F10.1 | chr5 | + |
| ASHG19A3A028260 | 0.032815 | 0.212892 | 2.729314 | down | noncoding | ENST00000509515 | CTD-2085F10.1 | chr5 | + |
| ASHG19A3A028260 | 0.032815 | 0.212892 | 2.729314 | down | noncoding | ENST00000509515 | CTD-2085F10.1 | chr5 | + |

|                 |          |          |          |      |           |                 |               |      |   |
|-----------------|----------|----------|----------|------|-----------|-----------------|---------------|------|---|
| ASHG19A3A028358 | 0.046507 | 0.247406 | 4.079621 | down | noncoding | ENST00000509441 | CTC-349J22.1  | chr5 | + |
| ASHG19A3A028414 | 0.005471 | 0.102582 | 3.279983 | down | noncoding | G43036          |               | chr5 | + |
| ASHG19A3A028425 | 0.008958 | 0.124804 | 3.462593 | down | noncoding | ENST00000510759 | CTC-422A18.2  | chr5 | + |
| ASHG19A3A028526 | 0.020893 | 0.175843 | 2.299624 | down | noncoding | ENST00000506586 | CTC-303L1.1   | chr5 | + |
| ASHG19A3A028526 | 0.020893 | 0.175843 | 2.299624 | down | noncoding | ENST00000506586 | CTC-303L1.1   | chr5 | + |
| ASHG19A3A028562 | 0.024573 | 0.188533 | 2.387645 | down | noncoding | ENST00000504105 | CTD-2007H13.2 | chr5 | + |
| ASHG19A3A028596 | 0.006045 | 0.106589 | 5.664057 | down | noncoding | HIT000070642    |               | chr5 | + |
| ASHG19A3A028651 | 0.018771 | 0.168175 | 2.059919 | down | noncoding | G43610          |               | chr5 | + |
| ASHG19A3A028794 | 0.017774 | 0.165106 | 5.456941 | down | noncoding | ENST00000505029 | RP11-485M7.1  | chr5 | + |
| ASHG19A3A028810 | 0.035805 | 0.222764 | 2.739237 | down | noncoding | BC034282        |               | chr5 | + |
| ASHG19A3A029083 | 0.013426 | 0.145745 | 3.184575 | down | noncoding | G36711          |               | chr5 | + |
| ASHG19A3A029295 | 0.026062 | 0.193675 | 4.105301 | down | noncoding | uc003mnq.2      | BC016291      | chr5 | + |
| ASHG19A3A029300 | 0.029892 | 0.205361 | 2.010119 | down | noncoding | ENST00000476406 | AC138031.1    | chr5 | + |
| ASHG19A3A029363 | 0.020205 | 0.174085 | 2.886518 | down | noncoding | ENST00000407959 | RP1-182O16.1  | chr6 | - |
| ASHG19A3A029407 | 0.028528 | 0.201411 | 2.914596 | down | noncoding | ENST00000407436 | RP11-360O19.5 | chr6 | - |
| ASHG19A3A029407 | 0.028528 | 0.201411 | 2.914596 | down | noncoding | ENST00000407436 | RP11-360O19.5 | chr6 | - |
| ASHG19A3A029462 | 0.038904 | 0.230384 | 2.186458 | down | noncoding | BC040832        |               | chr1 | + |
| ASHG19A3A029486 | 0.048583 | 0.25108  | 2.428325 | down | noncoding | AK022008        |               | chr1 | + |
| ASHG19A3A029519 | 0.006507 | 0.110473 | 2.909741 | down | noncoding | ENST00000454426 | HIST1H2APS2   | chr6 | - |
| ASHG19A3A029632 | 0.033351 | 0.214702 | 5.909695 | down | noncoding | ENST00000441380 | IFITM4P       | chr6 | - |
| ASHG19A3A029637 | 0.035422 | 0.2213   | 2.414398 | down | noncoding | ENST00000416822 | MICG          | chr6 | - |
| ASHG19A3A029828 | 0.018564 | 0.166966 | 2.780416 | down | noncoding | AK094536        |               | chr1 | - |
| ASHG19A3A029828 | 0.018564 | 0.166966 | 2.780416 | down | noncoding | AK094536        |               | chr1 | - |
| ASHG19A3A029834 | 0.014604 | 0.149756 | 2.78322  | down | noncoding | ENST00000453556 | RP1-179N16.3  | chr6 | - |
| ASHG19A3A029834 | 0.014604 | 0.149756 | 2.78322  | down | noncoding | ENST00000453556 | RP1-179N16.3  | chr6 | - |
| ASHG19A3A029834 | 0.014604 | 0.149756 | 2.78322  | down | noncoding | ENST00000453556 | RP1-179N16.3  | chr6 | - |
| ASHG19A3A029834 | 0.014604 | 0.149756 | 2.78322  | down | noncoding | ENST00000453556 | RP1-179N16.3  | chr6 | - |
| ASHG19A3A029988 | 0.00334  | 0.084755 | 4.334074 | down | noncoding | ENST00000404962 | RP4-724P12.1  | chr6 | - |
| ASHG19A3A030018 | 0.023959 | 0.185992 | 2.703322 | down | noncoding | ENST00000471856 | RP11-337C18.5 | chr1 | + |
| ASHG19A3A030063 | 0.014325 | 0.148177 | 13.13178 | down | noncoding | ENST00000374318 | RP11-337C18.4 | chr1 | + |
| ASHG19A3A030174 | 0.028592 | 0.201607 | 4.738704 | down | noncoding | ENST00000405542 | RP3-508D13.1  | chr6 | - |
| ASHG19A3A030183 | 0.041238 | 0.236689 | 4.13516  | down | noncoding | ENST00000404330 | RP11-250B2.1  | chr6 | - |
| ASHG19A3A030199 | 0.045329 | 0.244109 | 2.065022 | down | noncoding | uc003pju.1      | AK023685      | chr6 | - |

|                 |          |          |          |      |           |                 |                |      |   |
|-----------------|----------|----------|----------|------|-----------|-----------------|----------------|------|---|
| ASHG19A3A030199 | 0.045329 | 0.244109 | 2.065022 | down | noncoding | uc003pju.1      | AK023685       | chr6 | - |
| ASHG19A3A030199 | 0.045329 | 0.244109 | 2.065022 | down | noncoding | uc003pju.1      | AK023685       | chr6 | - |
| ASHG19A3A030199 | 0.045329 | 0.244109 | 2.065022 | down | noncoding | uc003pju.1      | AK023685       | chr6 | - |
| ASHG19A3A030199 | 0.045329 | 0.244109 | 2.065022 | down | noncoding | uc003pju.1      | AK023685       | chr6 | - |
| ASHG19A3A030199 | 0.045329 | 0.244109 | 2.065022 | down | noncoding | uc003pju.1      | AK023685       | chr6 | - |
| ASHG19A3A030209 | 0.004526 | 0.095403 | 120.2876 | down | noncoding | ENST00000405071 | RP11-132M7.2   | chr6 | - |
| ASHG19A3A030281 | 0.02179  | 0.178806 | 2.463486 | down | noncoding | ENST00000406314 | RP11-40G16.1   | chr6 | - |
| ASHG19A3A030300 | 0.001071 | 0.057323 | 2.96113  | down | noncoding | ENST00000403144 | RP11-111D3.1   | chr6 | - |
| ASHG19A3A030382 | 0.008186 | 0.120648 | 6.154982 | down | noncoding | NR_002932       | GSTM2P1        | chr6 | - |
| ASHG19A3A030429 | 0.03257  | 0.212573 | 2.636913 | down | noncoding | ENST00000404319 | RP1-136O14.1   | chr6 | - |
| ASHG19A3A030476 | 0.006823 | 0.112118 | 4.679781 | down | noncoding | ENST00000439075 | RP11-510H23.1  | chr6 | - |
| ASHG19A3A030502 | 0.036086 | 0.223195 | 3.422497 | down | noncoding | ENST00000426826 | RP11-458I7.1   | chr1 | + |
| ASHG19A3A030533 | 0.035311 | 0.221215 | 3.144302 | down | noncoding | AK129530        |                | chr6 | - |
| ASHG19A3A030552 | 0.015878 | 0.155353 | 5.197078 | down | noncoding | ENST00000406512 | FTHL26         | chr6 | - |
| ASHG19A3A030609 | 0.043084 | 0.238904 | 2.598437 | down | noncoding | ENST00000405630 | RP11-390P2.2   | chr6 | - |
| ASHG19A3A030767 | 0.030475 | 0.207389 | 4.245669 | down | noncoding | BC041951        |                | chr6 | - |
| ASHG19A3A030767 | 0.030475 | 0.207389 | 4.245669 | down | noncoding | BC041951        |                | chr6 | - |
| ASHG19A3A030796 | 0.034109 | 0.216612 | 9.841676 | down | noncoding | CR601496        |                | chr6 | - |
| ASHG19A3A030796 | 0.034109 | 0.216612 | 9.841676 | down | noncoding | CR601496        |                | chr6 | - |
| ASHG19A3A030796 | 0.034109 | 0.216612 | 9.841676 | down | noncoding | CR601496        |                | chr6 | - |
| ASHG19A3A030796 | 0.034109 | 0.216612 | 9.841676 | down | noncoding | CR601496        |                | chr6 | - |
| ASHG19A3A030949 | 0.005359 | 0.101629 | 4.772798 | down | noncoding | ENST00000379928 | RP11-69L16.4   | chr6 | + |
| ASHG19A3A031059 | 0.037642 | 0.227412 | 2.292322 | down | noncoding | ENST00000403629 | RP11-31K13.1   | chr6 | + |
| ASHG19A3A031123 | 0.001375 | 0.062595 | 3.616034 | down | noncoding | uc011dkm.1      | BTN2A3         | chr6 | + |
| ASHG19A3A031189 | 0.02594  | 0.193525 | 2.325818 | down | noncoding | ENST00000396818 | RPL13P         | chr6 | + |
| ASHG19A3A031219 | 0.013709 | 0.14631  | 2.053944 | down | noncoding | NR_001434       | HLA-H          | chr6 | + |
| ASHG19A3A031242 | 0.013833 | 0.146518 | 2.095116 | down | noncoding | ENST00000437516 | HLA-N          | chr6 | + |
| ASHG19A3A031389 | 0.005282 | 0.101436 | 13.16932 | down | noncoding | ENST00000429998 | RP11-513I15.6  | chr6 | + |
| ASHG19A3A031622 | 0.017091 | 0.161406 | 2.025658 | down | noncoding | ENST00000408043 | SLC25A20P1     | chr6 | + |
| ASHG19A3A031655 | 0.000404 | 0.044339 | 2.78088  | down | noncoding | AF086156        |                | chr6 | + |
| ASHG19A3A031719 | 0.001042 | 0.057323 | 3.846177 | down | noncoding | ENST00000441363 | RP11-398K22.12 | chr6 | + |
| ASHG19A3A031724 | 0.016702 | 0.159472 | 2.29884  | down | noncoding | ENST00000501658 | AL590431.2     | chr1 | + |
| ASHG19A3A031724 | 0.016702 | 0.159472 | 2.29884  | down | noncoding | ENST00000501658 | AL590431.2     | chr1 | + |

|                 |          |          |          |      |           |                 |               |      |   |
|-----------------|----------|----------|----------|------|-----------|-----------------|---------------|------|---|
| ASHG19A3A031724 | 0.016702 | 0.159472 | 2.29884  | down | noncoding | ENST00000501658 | AL590431.2    | chr1 | + |
| ASHG19A3A031724 | 0.016702 | 0.159472 | 2.29884  | down | noncoding | ENST00000501658 | AL590431.2    | chr1 | + |
| ASHG19A3A031724 | 0.016702 | 0.159472 | 2.29884  | down | noncoding | ENST00000501658 | AL590431.2    | chr1 | + |
| ASHG19A3A031741 | 0.048994 | 0.251915 | 3.524844 | down | noncoding | ENST00000402607 | RP11-474L11.3 | chr6 | + |
| ASHG19A3A031771 | 0.049175 | 0.25214  | 2.438773 | down | noncoding | AJ420536        |               | chr6 | + |
| ASHG19A3A031816 | 0.009593 | 0.128384 | 3.027449 | down | noncoding | ENST00000401460 | RP1-72A23.3   | chr6 | + |
| ASHG19A3A031817 | 6.73E-05 | 0.022687 | 2.131872 | down | noncoding | ENST00000403367 | RP1-72A23.1   | chr6 | + |
| ASHG19A3A031863 | 0.035802 | 0.222764 | 3.876024 | down | noncoding | ENST00000413107 | RP11-758C21.1 | chr6 | + |
| ASHG19A3A031885 | 0.00144  | 0.062929 | 6.659364 | down | noncoding | G36625          |               | chr6 | + |
| ASHG19A3A031903 | 0.038763 | 0.230358 | 4.090974 | down | noncoding | AK095376        |               | chr6 | + |
| ASHG19A3A031919 | 0.007221 | 0.113881 | 4.26401  | down | noncoding | ENST00000441999 | RP11-425D10.1 | chr6 | + |
| ASHG19A3A032054 | 0.03201  | 0.211507 | 2.016953 | down | noncoding | ENST00000406671 | RP3-351K20.4  | chr6 | + |
| ASHG19A3A032152 | 0.049908 | 0.252541 | 2.244214 | down | noncoding | ENST00000402141 | RP1-20N2.2    | chr6 | + |
| ASHG19A3A032162 | 0.011207 | 0.135519 | 3.817202 | down | noncoding | G43356          |               | chr6 | + |
| ASHG19A3A032162 | 0.011207 | 0.135519 | 3.817202 | down | noncoding | G43356          |               | chr6 | + |
| ASHG19A3A032162 | 0.011207 | 0.135519 | 3.817202 | down | noncoding | G43356          |               | chr6 | + |
| ASHG19A3A032162 | 0.011207 | 0.135519 | 3.817202 | down | noncoding | G43356          |               | chr6 | + |
| ASHG19A3A032162 | 0.011207 | 0.135519 | 3.817202 | down | noncoding | G43356          |               | chr6 | + |
| ASHG19A3A032162 | 0.011207 | 0.135519 | 3.817202 | down | noncoding | G43356          |               | chr6 | + |
| ASHG19A3A032162 | 0.011207 | 0.135519 | 3.817202 | down | noncoding | G43356          |               | chr6 | + |
| ASHG19A3A032162 | 0.011207 | 0.135519 | 3.817202 | down | noncoding | G43356          |               | chr6 | + |
| ASHG19A3A032250 | 0.020813 | 0.175618 | 3.43502  | down | noncoding | ENST00000404107 | RP11-486M3.2  | chr6 | + |
| ASHG19A3A032260 | 0.045352 | 0.244109 | 3.189319 | down | noncoding | ENST00000402808 | RP11-230C9.1  | chr6 | + |
| ASHG19A3A032321 | 0.027632 | 0.19852  | 2.582895 | down | noncoding | G43611          |               | chr6 | + |
| ASHG19A3A032359 | 0.008199 | 0.120678 | 2.523375 | down | noncoding | AJ420589        |               | chr6 | + |
| ASHG19A3A032389 | 0.00161  | 0.065366 | 5.218877 | down | noncoding | AK124993        |               | chr7 | - |
| ASHG19A3A032442 | 0.002564 | 0.076396 | 2.482969 | down | noncoding | G31709          |               | chr7 | - |
| ASHG19A3A032442 | 0.002564 | 0.076396 | 2.482969 | down | noncoding | G31709          |               | chr7 | - |
| ASHG19A3A032507 | 0.024836 | 0.189636 | 4.453213 | down | noncoding | ENST00000428816 | AC098592.8    | chr7 | - |
| ASHG19A3A032544 | 0.000772 | 0.053305 | 16.66683 | down | noncoding | ENST00000421730 | AC005682.8    | chr7 | - |
| ASHG19A3A032777 | 0.03828  | 0.22951  | 3.016037 | down | noncoding | ENST00000455449 | AC073115.5    | chr7 | - |
| ASHG19A3A032793 | 0.045022 | 0.243678 | 3.941491 | down | noncoding | ENST00000429312 | AC006024.3    | chr7 | - |
| ASHG19A3A032925 | 0.04259  | 0.238285 | 3.529915 | down | noncoding | ENST00000422823 | RP11-416N13.1 | chr7 | - |

|                 |          |          |          |      |           |                 |               |      |   |
|-----------------|----------|----------|----------|------|-----------|-----------------|---------------|------|---|
| ASHG19A3A032949 | 2.89E-05 | 0.017174 | 2.794889 | down | noncoding | ENST00000474858 | GS1-124K5.9   | chr7 | - |
| ASHG19A3A032982 | 0.001026 | 0.057323 | 3.53899  | down | noncoding | AK094163        |               | chr1 | + |
| ASHG19A3A033094 | 2.32E-06 | 0.006955 | 9.319608 | down | noncoding | uc003uhq.1      | AK092048      | chr7 | - |
| ASHG19A3A033226 | 0.047026 | 0.248431 | 3.308885 | down | noncoding | ENST00000434352 | AC073063.10   | chr7 | - |
| ASHG19A3A033226 | 0.047026 | 0.248431 | 3.308885 | down | noncoding | ENST00000434352 | AC073063.10   | chr7 | - |
| ASHG19A3A033226 | 0.047026 | 0.248431 | 3.308885 | down | noncoding | ENST00000434352 | AC073063.10   | chr7 | - |
| ASHG19A3A033313 | 0.004992 | 0.098523 | 2.435038 | down | noncoding | ENST00000426806 | RP11-401L13.5 | chr7 | - |
| ASHG19A3A033406 | 0.015964 | 0.155608 | 3.857624 | down | noncoding | uc003vhn.1      | BC040208      | chr7 | - |
| ASHG19A3A033493 | 0.001072 | 0.057323 | 2.577972 | down | noncoding | ENST00000490314 | AC073934.6    | chr7 | - |
| ASHG19A3A033513 | 0.02102  | 0.176175 | 3.113834 | down | noncoding | G36725          |               | chr7 | - |
| ASHG19A3A033513 | 0.02102  | 0.176175 | 3.113834 | down | noncoding | G36725          |               | chr7 | - |
| ASHG19A3A033513 | 0.02102  | 0.176175 | 3.113834 | down | noncoding | G36725          |               | chr7 | - |
| ASHG19A3A033513 | 0.02102  | 0.176175 | 3.113834 | down | noncoding | G36725          |               | chr7 | - |
| ASHG19A3A033513 | 0.02102  | 0.176175 | 3.113834 | down | noncoding | G36725          |               | chr7 | - |
| ASHG19A3A033513 | 0.02102  | 0.176175 | 3.113834 | down | noncoding | G36725          |               | chr7 | - |
| ASHG19A3A033521 | 1.83E-05 | 0.014741 | 4.47363  | down | noncoding | ENST00000433622 | RP11-309L24.6 | chr7 | - |
| ASHG19A3A033677 | 0.019337 | 0.170867 | 5.524348 | down | noncoding | ENST00000464866 | AC073342.13   | chr7 | - |
| ASHG19A3A033680 | 0.000194 | 0.034555 | 3.654149 | down | noncoding | ENST00000429630 | AC093673.5    | chr7 | - |
| ASHG19A3A033680 | 0.000194 | 0.034555 | 3.654149 | down | noncoding | ENST00000429630 | AC093673.5    | chr7 | - |
| ASHG19A3A033690 | 0.012066 | 0.140376 | 13.32712 | down | noncoding | NR_015421       | LOC154761     | chr7 | - |
| ASHG19A3A033768 | 0.037527 | 0.227009 | 3.845496 | down | noncoding | BC015321        |               | chr7 | - |
| ASHG19A3A033980 | 0.002719 | 0.07915  | 138.6382 | down | noncoding | uc001gch.1      | AF268386      | chr1 | + |
| ASHG19A3A034012 | 0.010798 | 0.133478 | 12.19594 | down | noncoding | CR622072        |               | chr7 | + |
| ASHG19A3A034014 | 0.029107 | 0.203139 | 9.968241 | down | noncoding | HIT000325634    |               | chr7 | + |
| ASHG19A3A034046 | 0.040756 | 0.235431 | 6.680309 | down | noncoding | ENST00000422542 | AC005682.5    | chr7 | + |
| ASHG19A3A034058 | 0.016017 | 0.155645 | 6.474757 | down | noncoding | ENST00000436576 | AC079780.3    | chr7 | + |
| ASHG19A3A034296 | 0.004864 | 0.098196 | 7.547039 | down | noncoding | ENST00000459691 | EPS15L2       | chr7 | + |
| ASHG19A3A034460 | 0.049042 | 0.251991 | 2.487485 | down | noncoding | ENST00000441415 | RP11-460N20.5 | chr7 | + |
| ASHG19A3A034505 | 0.013621 | 0.145815 | 2.753145 | down | noncoding | ENST00000433493 | RP5-859M6.1   | chr7 | + |
| ASHG19A3A034534 | 0.03737  | 0.226954 | 2.126708 | down | noncoding | G31743          |               | chr7 | + |
| ASHG19A3A034625 | 1.22E-05 | 0.014741 | 13.5162  | down | noncoding | ENST00000426835 | AC004945.2    | chr7 | + |
| ASHG19A3A034638 | 0.007088 | 0.113409 | 7.155247 | down | noncoding | ENST00000434994 | AC004006.2    | chr7 | + |
| ASHG19A3A034674 | 0.013614 | 0.145815 | 2.259887 | down | noncoding | ENST00000450915 | AC006988.3    | chr7 | + |

|                 |          |          |          |      |           |                 |               |      |   |
|-----------------|----------|----------|----------|------|-----------|-----------------|---------------|------|---|
| ASHG19A3A034723 | 0.014685 | 0.150416 | 3.072643 | down | noncoding | ENST00000398143 | AC104700.2    | chr7 | + |
| ASHG19A3A034771 | 0.012538 | 0.14212  | 2.138134 | down | noncoding | G43349          |               | chr7 | + |
| ASHG19A3A034771 | 0.012538 | 0.14212  | 2.138134 | down | noncoding | G43349          |               | chr7 | + |
| ASHG19A3A034771 | 0.012538 | 0.14212  | 2.138134 | down | noncoding | G43349          |               | chr7 | + |
| ASHG19A3A034771 | 0.012538 | 0.14212  | 2.138134 | down | noncoding | G43349          |               | chr7 | + |
| ASHG19A3A034771 | 0.012538 | 0.14212  | 2.138134 | down | noncoding | G43349          |               | chr7 | + |
| ASHG19A3A034871 | 0.041669 | 0.237597 | 4.06049  | down | noncoding | ENST00000488019 | RP4-778K6.2   | chr7 | + |
| ASHG19A3A034909 | 0.012359 | 0.141883 | 4.976108 | down | noncoding | ENST00000453261 | AC073387.2    | chr7 | + |
| ASHG19A3A035128 | 0.033344 | 0.214702 | 3.649608 | down | noncoding | ENST00000453822 | AC108510.2    | chr7 | + |
| ASHG19A3A035186 | 3.09E-05 | 0.017174 | 12.6108  | down | noncoding | ENST00000477911 | MYL6P4        | chr7 | + |
| ASHG19A3A035361 | 0.015379 | 0.153863 | 9.386026 | down | noncoding | ENST00000469999 | RP11-208G20.1 | chr7 | + |
| ASHG19A3A035481 | 0.000464 | 0.045345 | 2.619459 | down | noncoding | ENST00000421457 | AF228730.8    | chr8 | - |
| ASHG19A3A035516 | 0.011777 | 0.138709 | 2.51532  | down | noncoding | AJ291676        |               | chr8 | - |
| ASHG19A3A035518 | 0.001402 | 0.062848 | 5.706585 | down | noncoding | AF124367        |               | chr8 | - |
| ASHG19A3A035597 | 0.04138  | 0.236689 | 2.130626 | down | noncoding | NR_027715       | FLJ14107      | chr8 | - |
| ASHG19A3A035684 | 0.048389 | 0.250516 | 2.42813  | down | noncoding | ENST00000495560 | AC090453.1    | chr8 | - |
| ASHG19A3A035883 | 0.003038 | 0.082215 | 6.492832 | down | noncoding | NR_024360       | LOC100192378  | chr8 | - |
| ASHG19A3A035959 | 0.018321 | 0.166769 | 2.834178 | down | noncoding | ENST00000466433 | CTC-788C1.1   | chr8 | - |
| ASHG19A3A036028 | 0.007136 | 0.113604 | 2.284243 | down | noncoding | NR_027071       | C8orf56       | chr8 | - |
| ASHG19A3A036028 | 0.007136 | 0.113604 | 2.284243 | down | noncoding | NR_027071       | C8orf56       | chr8 | - |
| ASHG19A3A036068 | 0.042636 | 0.238313 | 2.640584 | down | noncoding | ENST00000503142 | RP11-46A10.6  | chr1 | + |
| ASHG19A3A036185 | 0.010213 | 0.130859 | 14.94876 | down | noncoding | AK026750        |               | chr8 | - |
| ASHG19A3A036362 | 0.002432 | 0.074845 | 2.996973 | down | noncoding | NR_027425       | FAM66D        | chr8 | + |
| ASHG19A3A036369 | 0.008775 | 0.123403 | 2.670081 | down | noncoding | uc003wvz.1      | AX747586      | chr8 | + |
| ASHG19A3A036382 | 0.032129 | 0.212008 | 3.283994 | down | noncoding | AK123645        |               | chr8 | + |
| ASHG19A3A036422 | 0.002147 | 0.072257 | 2.174543 | down | noncoding | NR_033403       | BMP1          | chr8 | + |
| ASHG19A3A036422 | 0.002147 | 0.072257 | 2.174543 | down | noncoding | NR_033403       | BMP1          | chr8 | + |
| ASHG19A3A036507 | 0.040573 | 0.235004 | 5.563537 | down | noncoding | ENST00000508840 | CTD-2345M20.1 | chr8 | + |
| ASHG19A3A036512 | 0.002833 | 0.080918 | 9.087708 | down | noncoding | AK025893        |               | chr8 | + |
| ASHG19A3A036512 | 0.002833 | 0.080918 | 9.087708 | down | noncoding | AK025893        |               | chr8 | + |
| ASHG19A3A036512 | 0.002833 | 0.080918 | 9.087708 | down | noncoding | AK025893        |               | chr8 | + |
| ASHG19A3A036514 | 0.016231 | 0.156468 | 4.740026 | down | noncoding | AK024192        |               | chr8 | + |
| ASHG19A3A036514 | 0.016231 | 0.156468 | 4.740026 | down | noncoding | AK024192        |               | chr8 | + |

|                 |          |          |          |      |           |                 |               |      |   |
|-----------------|----------|----------|----------|------|-----------|-----------------|---------------|------|---|
| ASHG19A3A036514 | 0.016231 | 0.156468 | 4.740026 | down | noncoding | AK024192        |               | chr8 | + |
| ASHG19A3A036612 | 0.034486 | 0.218083 | 3.119907 | down | noncoding | ENST00000471393 | RP11-400K9.1  | chr8 | + |
| ASHG19A3A036727 | 0.008071 | 0.119838 | 4.331977 | down | noncoding | ENST00000329349 | AC091175.1    | chr8 | + |
| ASHG19A3A037212 | 0.00461  | 0.095927 | 4.560463 | down | noncoding | ENST00000417716 | RP11-332L8.1  | chr1 | + |
| ASHG19A3A037272 | 0.040264 | 0.234326 | 2.54045  | down | noncoding | ENST00000372214 | RP11-571F15.3 | chr9 | - |
| ASHG19A3A037272 | 0.040264 | 0.234326 | 2.54045  | down | noncoding | ENST00000372214 | RP11-571F15.3 | chr9 | - |
| ASHG19A3A037272 | 0.040264 | 0.234326 | 2.54045  | down | noncoding | ENST00000372214 | RP11-571F15.3 | chr9 | - |
| ASHG19A3A037272 | 0.040264 | 0.234326 | 2.54045  | down | noncoding | ENST00000372214 | RP11-571F15.3 | chr9 | - |
| ASHG19A3A037272 | 0.040264 | 0.234326 | 2.54045  | down | noncoding | ENST00000372214 | RP11-571F15.3 | chr9 | - |
| ASHG19A3A037297 | 0.000297 | 0.039457 | 3.201295 | down | noncoding | BC043003        |               | chr1 | + |
| ASHG19A3A037344 | 0.041331 | 0.236689 | 2.06408  | down | noncoding | ENST00000422509 | RP11-405L18.4 | chr9 | - |
| ASHG19A3A037352 | 0.002302 | 0.074504 | 2.777125 | down | noncoding | NR_024872       | MCART1        | chr9 | - |
| ASHG19A3A037361 | 0.002317 | 0.074682 | 2.634896 | down | noncoding | ENST00000443069 | RP11-403F21.1 | chr9 | - |
| ASHG19A3A037398 | 0.000241 | 0.035463 | 16.88789 | down | noncoding | NR_003670       | KGFLP2        | chr9 | - |
| ASHG19A3A037399 | 0.001849 | 0.068556 | 9.923002 | down | noncoding | ENST00000454645 | RP11-204M4.2  | chr9 | - |
| ASHG19A3A037424 | 0.017461 | 0.163396 | 3.395892 | down | noncoding | ENST00000417687 | RP11-24B13.1  | chr9 | - |
| ASHG19A3A037435 | 0.000108 | 0.031537 | 15.22223 | down | noncoding | ENST00000377549 | RP11-475I24.1 | chr9 | - |
| ASHG19A3A037469 | 0.000147 | 0.031585 | 21.73758 | down | noncoding | ENST00000514120 | RP11-96J15.2  | chr9 | - |
| ASHG19A3A037500 | 0.035195 | 0.220893 | 2.066877 | down | noncoding | ENST00000433508 | RP11-452D2.1  | chr9 | - |
| ASHG19A3A037510 | 0.016816 | 0.159853 | 3.098071 | down | noncoding | NR_002836       | PGM5P2        | chr9 | - |
| ASHG19A3A037527 | 0.027842 | 0.199314 | 3.179578 | down | noncoding | ENST00000377415 | RP11-460E7.1  | chr9 | - |
| ASHG19A3A037565 | 0.000855 | 0.054175 | 5.166579 | down | noncoding | uc011lsc.1      | HSPBL2        | chr9 | - |
| ASHG19A3A037566 | 0.047177 | 0.248625 | 2.073175 | down | noncoding | ENST00000423240 | RP11-346E17.4 | chr9 | - |
| ASHG19A3A037754 | 0.004525 | 0.095403 | 2.480792 | down | noncoding | NR_023390       | C9orf130      | chr9 | - |
| ASHG19A3A037824 | 0.015958 | 0.155608 | 6.197553 | down | noncoding | ENST00000418219 | RP11-490D19.8 | chr9 | - |
| ASHG19A3A037865 | 0.039262 | 0.231061 | 3.845357 | down | noncoding | ENST00000449233 | RP11-380I20.2 | chr9 | - |
| ASHG19A3A037995 | 0.030403 | 0.207085 | 7.063537 | down | noncoding | AK123875        |               | chr9 | - |
| ASHG19A3A038091 | 0.043411 | 0.239621 | 2.044077 | down | noncoding | ENST00000434999 | RP11-216B9.6  | chr9 | - |
| ASHG19A3A038091 | 0.043411 | 0.239621 | 2.044077 | down | noncoding | ENST00000434999 | RP11-216B9.6  | chr9 | - |
| ASHG19A3A038091 | 0.043411 | 0.239621 | 2.044077 | down | noncoding | ENST00000434999 | RP11-216B9.6  | chr9 | - |
| ASHG19A3A038091 | 0.043411 | 0.239621 | 2.044077 | down | noncoding | ENST00000434999 | RP11-216B9.6  | chr9 | - |
| ASHG19A3A038091 | 0.043411 | 0.239621 | 2.044077 | down | noncoding | ENST00000434999 | RP11-216B9.6  | chr9 | - |
| ASHG19A3A038311 | 0.022168 | 0.180848 | 3.209501 | down | noncoding | ENST00000427722 | RP11-509J21.3 | chr9 | + |



|                 |          |          |          |      |           |                 |                |      |   |
|-----------------|----------|----------|----------|------|-----------|-----------------|----------------|------|---|
| ASHG19A3A038341 | 0.019371 | 0.171035 | 2.161473 | down | noncoding | ENST00000456723 | RP11-307L3.2   | chr9 | + |
| ASHG19A3A038374 | 0.027936 | 0.199699 | 8.209703 | down | noncoding | ENST00000396994 | RP11-280O24.1  | chr9 | + |
| ASHG19A3A038434 | 0.003322 | 0.084719 | 3.913802 | down | noncoding | ENST00000444041 | RP11-370B11.1  | chr9 | + |
| ASHG19A3A038468 | 0.000101 | 0.030979 | 7.661961 | down | noncoding | BC030746        |                | chr9 | + |
| ASHG19A3A038500 | 0.024095 | 0.186538 | 6.262717 | down | noncoding | ENST00000419794 | RP11-571F15.6  | chr9 | + |
| ASHG19A3A038545 | 0.04014  | 0.234123 | 2.181286 | down | noncoding | NR_024283       | LOC158376      | chr9 | + |
| ASHG19A3A038589 | 0.049738 | 0.252541 | 3.762691 | down | noncoding | ENST00000453646 | RP11-290L7.2   | chr9 | + |
| ASHG19A3A038633 | 0.011509 | 0.137737 | 2.190275 | down | noncoding | ENST00000357305 | BX649597.1     | chr9 | + |
| ASHG19A3A038634 | 0.009899 | 0.129615 | 5.847817 | down | noncoding | ENST00000433223 | ATP5A1P5       | chr9 | + |
| ASHG19A3A038646 | 0.019449 | 0.171434 | 2.070278 | down | noncoding | ENST00000411556 | RBPIP6         | chr9 | + |
| ASHG19A3A038663 | 0.03261  | 0.212573 | 2.285148 | down | noncoding | ENST00000423863 | RP11-187C18.3  | chr9 | + |
| ASHG19A3A038697 | 0.000137 | 0.031585 | 12.27055 | down | noncoding | ENST00000443706 | RP11-262H14.11 | chr9 | + |
| ASHG19A3A038722 | 0.032377 | 0.212255 | 9.48755  | down | noncoding | ENST00000416700 | RP11-58A12.3   | chr9 | + |
| ASHG19A3A038731 | 0.006127 | 0.107494 | 2.139958 | down | noncoding | ENST00000411645 | RP11-6B6.3     | chr1 | + |
| ASHG19A3A038731 | 0.006127 | 0.107494 | 2.139958 | down | noncoding | ENST00000411645 | RP11-6B6.3     | chr1 | + |
| ASHG19A3A038764 | 0.01238  | 0.141895 | 2.807529 | down | noncoding | CR618740        |                | chr9 | + |
| ASHG19A3A038764 | 0.01238  | 0.141895 | 2.807529 | down | noncoding | CR618740        |                | chr9 | + |
| ASHG19A3A038764 | 0.01238  | 0.141895 | 2.807529 | down | noncoding | CR618740        |                | chr9 | + |
| ASHG19A3A038764 | 0.01238  | 0.141895 | 2.807529 | down | noncoding | CR618740        |                | chr9 | + |
| ASHG19A3A038764 | 0.01238  | 0.141895 | 2.807529 | down | noncoding | CR618740        |                | chr9 | + |
| ASHG19A3A038764 | 0.01238  | 0.141895 | 2.807529 | down | noncoding | CR618740        |                | chr9 | + |
| ASHG19A3A038764 | 0.01238  | 0.141895 | 2.807529 | down | noncoding | CR618740        |                | chr9 | + |
| ASHG19A3A038764 | 0.01238  | 0.141895 | 2.807529 | down | noncoding | CR618740        |                | chr9 | + |
| ASHG19A3A038877 | 0.047616 | 0.249442 | 5.335159 | down | noncoding | ENST00000488829 | CDC20P         | chr9 | + |
| ASHG19A3A038879 | 0.027049 | 0.196393 | 2.830017 | down | noncoding | ENST00000454946 | RP11-497K15.1  | chr9 | + |
| ASHG19A3A038889 | 0.006557 | 0.110651 | 4.025325 | down | noncoding | NR_033405       | LOC1518        | chr9 | + |
| ASHG19A3A038927 | 0.04896  | 0.251824 | 2.001802 | down | noncoding | AF116613        |                | chr9 | + |
| ASHG19A3A038935 | 0.04546  | 0.244109 | 2.095932 | down | noncoding | ENST00000367276 | C9orf44        | chr9 | + |
| ASHG19A3A039038 | 0.001328 | 0.06217  | 6.126758 | down | noncoding | ENST00000418987 | RP11-394D2.1   | chr9 | + |
| ASHG19A3A039112 | 0.038962 | 0.230384 | 3.806202 | down | noncoding | AK098037        |                | chr9 | + |
| ASHG19A3A039112 | 0.038962 | 0.230384 | 3.806202 | down | noncoding | AK098037        |                | chr9 | + |
| ASHG19A3A039269 | 0.045611 | 0.244393 | 2.334335 | down | noncoding | ENST00000425991 | RP11-228B15.4  | chr9 | + |
| ASHG19A3A039269 | 0.045611 | 0.244393 | 2.334335 | down | noncoding | ENST00000425991 | RP11-228B15.4  | chr9 | + |
| ASHG19A3A039402 | 0.00521  | 0.100845 | 2.427133 | down | noncoding | NR_015427       | NCRNA00094     | chr9 | + |

|                 |          |          |          |      |           |                 |                |      |   |
|-----------------|----------|----------|----------|------|-----------|-----------------|----------------|------|---|
| ASHG19A3A039449 | 0.014523 | 0.149298 | 20.57671 | down | noncoding | AK021425        |                | chr1 | + |
| ASHG19A3A039513 | 0.004749 | 0.096912 | 2.372807 | down | noncoding | AK000561        |                | chrM | - |
| ASHG19A3A039536 | 0.021231 | 0.176853 | 7.356849 | down | noncoding | ENST00000445107 | RP11-146D5.3   | chrX | - |
| ASHG19A3A039536 | 0.021231 | 0.176853 | 7.356849 | down | noncoding | ENST00000445107 | RP11-146D5.3   | chrX | - |
| ASHG19A3A039536 | 0.021231 | 0.176853 | 7.356849 | down | noncoding | ENST00000445107 | RP11-146D5.3   | chrX | - |
| ASHG19A3A039536 | 0.021231 | 0.176853 | 7.356849 | down | noncoding | ENST00000445107 | RP11-146D5.3   | chrX | - |
| ASHG19A3A039536 | 0.021231 | 0.176853 | 7.356849 | down | noncoding | ENST00000445107 | RP11-146D5.3   | chrX | - |
| ASHG19A3A039596 | 0.032798 | 0.212892 | 2.460965 | down | noncoding | ENST00000443728 | RP11-2N21.2    | chrX | - |
| ASHG19A3A039651 | 0.022946 | 0.183115 | 4.950625 | down | noncoding | ENST00000358001 | RP3-499B10.3   | chrX | - |
| ASHG19A3A039796 | 0.001597 | 0.065335 | 6.359612 | down | noncoding | ENST00000417985 | RP1-30G7.1     | chrX | - |
| ASHG19A3A039832 | 0.013055 | 0.144064 | 4.708259 | down | noncoding | ENST00000423117 | AF196972.10    | chrX | - |
| ASHG19A3A039840 | 0.019894 | 0.173013 | 5.668854 | down | noncoding | ENST00000406301 | AF196969.5     | chrX | - |
| ASHG19A3A039867 | 0.034899 | 0.219771 | 2.202011 | down | noncoding | ENST00000448722 | HSPBL3         | chrX | - |
| ASHG19A3A039908 | 0.008483 | 0.122132 | 4.642297 | down | noncoding | ENST00000443639 | RP11-552J9.14  | chrX | - |
| ASHG19A3A039966 | 0.023635 | 0.18529  | 2.673061 | down | noncoding | ENST00000404529 | RP11-445O16.2  | chrX | - |
| ASHG19A3A040065 | 0.00114  | 0.058346 | 3.135217 | down | noncoding | ENST00000458170 | RP11-69A21.2   | chrX | - |
| ASHG19A3A040085 | 0.039013 | 0.230484 | 3.580671 | down | noncoding | ENST00000393214 | AC004386.4     | chrX | - |
| ASHG19A3A040122 | 0.047328 | 0.248703 | 5.135335 | down | noncoding | ENST00000422893 | RP1-223D17.1   | chrX | - |
| ASHG19A3A040178 | 0.009258 | 0.126124 | 3.305411 | down | noncoding | ENST00000412087 | RP1-146H21.4   | chrX | - |
| ASHG19A3A040463 | 0.023094 | 0.183619 | 4.451013 | down | noncoding | ENST00000419413 | RP1-20J23.1    | chrX | - |
| ASHG19A3A040499 | 0.042537 | 0.238285 | 2.084939 | down | noncoding | ENST00000411473 | U40455.1       | chrX | - |
| ASHG19A3A040667 | 0.029456 | 0.204343 | 3.523707 | down | noncoding | ENST00000434191 | RP11-430A19.2  | chrX | + |
| ASHG19A3A040682 | 0.01202  | 0.140265 | 4.603967 | down | noncoding | ENST00000457574 | GS1-324M7.3    | chrX | + |
| ASHG19A3A040713 | 0.003789 | 0.088847 | 9.564547 | down | noncoding | G43551          |                | chrX | + |
| ASHG19A3A040770 | 0.000882 | 0.054542 | 3.647644 | down | noncoding | uc001hpe.1      | AK124056       | chr1 | + |
| ASHG19A3A040803 | 0.027867 | 0.199371 | 6.172551 | down | noncoding | ENST00000431458 | FTLL2          | chrX | + |
| ASHG19A3A040846 | 0.008624 | 0.122429 | 2.945082 | down | noncoding | ENST00000317902 | AF241726.2     | chrX | + |
| ASHG19A3A040862 | 0.002146 | 0.072257 | 3.985041 | down | noncoding | ENST00000422221 | RP11-469E19.1  | chrX | + |
| ASHG19A3A040936 | 0.018472 | 0.166966 | 6.400502 | down | noncoding | ENST00000445444 | RP11-344N17.11 | chrX | + |
| ASHG19A3A040940 | 0.012253 | 0.141057 | 3.505521 | down | noncoding | ENST00000433136 | RP11-344N17.13 | chrX | + |
| ASHG19A3A041023 | 0.010244 | 0.130859 | 4.742773 | down | noncoding | ENST00000435089 | RP11-552J9.12  | chrX | + |
| ASHG19A3A041023 | 0.010244 | 0.130859 | 4.742773 | down | noncoding | ENST00000435089 | RP11-552J9.12  | chrX | + |
| ASHG19A3A041023 | 0.010244 | 0.130859 | 4.742773 | down | noncoding | ENST00000435089 | RP11-552J9.12  | chrX | + |

|                 |          |          |          |      |           |                 |               |       |   |
|-----------------|----------|----------|----------|------|-----------|-----------------|---------------|-------|---|
| ASHG19A3A041024 | 0.013582 | 0.145812 | 5.032326 | down | noncoding | ENST00000454598 | RP11-552J9.13 | chrX  | + |
| ASHG19A3A041095 | 0.00714  | 0.113604 | 4.096691 | down | noncoding | ENST00000422965 | RP3-323B6.2   | chrX  | + |
| ASHG19A3A041165 | 0.031836 | 0.211006 | 3.024299 | down | noncoding | ENST00000424182 | RP11-402P6.6  | chrX  | + |
| ASHG19A3A041193 | 0.032585 | 0.212573 | 4.983157 | down | noncoding | ENST00000431339 | RP13-204A15.2 | chrX  | + |
| ASHG19A3A041244 | 0.003685 | 0.08774  | 2.228994 | down | noncoding | ENST00000416893 | RP11-121C22.1 | chrX  | + |
| ASHG19A3A041302 | 0.036089 | 0.223195 | 2.735035 | down | noncoding | ENST00000331267 | RP1-164F3.6   | chrX  | + |
| ASHG19A3A041311 | 0.003614 | 0.087271 | 2.003221 | down | noncoding | ENST00000372828 | RP4-545K15.3  | chrX  | + |
| ASHG19A3A041314 | 0.029648 | 0.204946 | 2.184023 | down | noncoding | AF085872        |               | chrX  | + |
| ASHG19A3A041412 | 0.039925 | 0.233464 | 4.080636 | down | noncoding | ENST00000438679 | RP5-1065P14.1 | chr1  | + |
| ASHG19A3A041441 | 0.007028 | 0.113157 | 3.592461 | down | noncoding | ENST00000438228 | RP3-378P9.1   | chrX  | + |
| ASHG19A3A041525 | 0.002396 | 0.074687 | 2.603365 | down | noncoding | ENST00000408950 | FAM45B        | chrX  | + |
| ASHG19A3A041538 | 0.003262 | 0.083828 | 2.589478 | down | noncoding | AF093744        |               | chrX  | + |
| ASHG19A3A042040 | 0.00709  | 0.113409 | 5.736906 | down | noncoding | ENST00000431631 | ATP5JP1       | chrY  | + |
| ASHG19A3A042078 | 3.38E-05 | 0.017465 | 2.851208 | down | noncoding | ENST00000435433 | AC002992.1    | chrY  | + |
| ASHG19A3A042242 | 0.027968 | 0.199722 | 3.034529 | down | noncoding | ENST00000413994 | RP11-527D7.1  | chr1  | + |
| ASHG19A3A042296 | 0.04824  | 0.250288 | 5.295049 | down | noncoding | ENST00000397642 | RP11-488L18.1 | chr1  | + |
| ASHG19A3A042342 | 0.040842 | 0.235654 | 3.072673 | down | noncoding | ENST00000441274 | RP11-490K7.1  | chr1  | - |
| ASHG19A3A042362 | 0.000207 | 0.034555 | 12.5369  | down | noncoding | ENST00000454470 | RP11-67B16.1  | chr10 | - |
| ASHG19A3A042488 | 0.017098 | 0.161406 | 3.781459 | down | noncoding | AK024109        |               | chr10 | - |
| ASHG19A3A042488 | 0.017098 | 0.161406 | 3.781459 | down | noncoding | AK024109        |               | chr10 | - |
| ASHG19A3A042493 | 0.001352 | 0.062273 | 4.94326  | down | noncoding | uc001iot.1      | BC078172      | chr10 | - |
| ASHG19A3A042511 | 0.035223 | 0.220975 | 3.718084 | down | noncoding | ENST00000427935 | RP11-265G8.3  | chr10 | - |
| ASHG19A3A042589 | 0.005713 | 0.10433  | 5.309177 | down | noncoding | ENST00000450834 | RP11-192P3.1  | chr10 | - |
| ASHG19A3A042589 | 0.005713 | 0.10433  | 5.309177 | down | noncoding | ENST00000450834 | RP11-192P3.1  | chr10 | - |
| ASHG19A3A042589 | 0.005713 | 0.10433  | 5.309177 | down | noncoding | ENST00000450834 | RP11-192P3.1  | chr10 | - |
| ASHG19A3A042589 | 0.005713 | 0.10433  | 5.309177 | down | noncoding | ENST00000450834 | RP11-192P3.1  | chr10 | - |
| ASHG19A3A042604 | 0.000706 | 0.051454 | 4.438465 | down | noncoding | BC043009        |               | chr10 | - |
| ASHG19A3A042668 | 0.000718 | 0.051625 | 2.588207 | down | noncoding | ENST00000417455 | RP11-402L1.1  | chr10 | - |
| ASHG19A3A042676 | 0.010722 | 0.133192 | 4.028219 | down | noncoding | NR_002726       | HNRNPA3P1     | chr10 | - |
| ASHG19A3A042706 | 0.010239 | 0.130859 | 2.190655 | down | noncoding | ENST00000373604 | RP4-622L5.7   | chr1  | - |
| ASHG19A3A042706 | 0.010239 | 0.130859 | 2.190655 | down | noncoding | ENST00000373604 | RP4-622L5.7   | chr1  | - |
| ASHG19A3A042706 | 0.010239 | 0.130859 | 2.190655 | down | noncoding | ENST00000373604 | RP4-622L5.7   | chr1  | - |
| ASHG19A3A042708 | 0.028537 | 0.201411 | 3.11771  | down | noncoding | ENST00000424552 | RP11-671E7.1  | chr10 | - |

|                 |          |          |          |      |           |                 |                                         |       |   |
|-----------------|----------|----------|----------|------|-----------|-----------------|-----------------------------------------|-------|---|
| ASHG19A3A042723 | 0.034405 | 0.217771 | 2.047591 | down | noncoding | ENST00000422732 | RP11-314P12.2                           | chr10 | - |
| ASHG19A3A042726 | 0.001445 | 0.062929 | 12.00997 | down | noncoding | uc001jef.2      | LOC643650                               | chr10 | - |
| ASHG19A3A042764 | 0.02267  | 0.182365 | 2.260298 | down | noncoding | ENST00000428825 | RP11-523O18.5                           | chr10 | - |
| ASHG19A3A042862 | 0.013558 | 0.145763 | 7.739795 | down | noncoding | ENST00000448009 | RP11-111N20.3                           | chr10 | - |
| ASHG19A3A042869 | 0.010142 | 0.130631 | 2.3206   | down | noncoding | ENST00000436904 | MYL6P3                                  | chr10 | - |
| ASHG19A3A043064 | 0.004206 | 0.09195  | 8.886827 | down | noncoding | uc009xtc.2      | LOC728190                               | chr10 | - |
| ASHG19A3A043066 | 0.009829 | 0.12926  | 3.229511 | down | noncoding | BC071814        |                                         | chr10 | - |
| ASHG19A3A043320 | 0.034041 | 0.216455 | 2.466507 | down | noncoding | G64298          |                                         | chr1  | - |
| ASHG19A3A043414 | 0.044221 | 0.241862 | 2.176672 | down | noncoding | ENST00000431701 | RP11-359B3.1                            | chr10 | - |
| ASHG19A3A043670 | 0.043656 | 0.24045  | 2.28825  | down | noncoding | ENST00000413342 | RP11-139J15.4                           | chr10 | + |
| ASHG19A3A043697 | 0.020448 | 0.174085 | 5.252088 | down | noncoding | ENST00000426373 | RP11-108B14.4                           | chr10 | + |
| ASHG19A3A043750 | 0.037785 | 0.22791  | 2.719056 | down | noncoding | NR_003930       | LOC387647                               | chr10 | + |
| ASHG19A3A043950 | 0.001799 | 0.067636 | 2.105985 | down | noncoding | ENST00000435916 | RP11-56A21.4                            | chr10 | + |
| ASHG19A3A044013 | 0.005478 | 0.102582 | 3.006893 | down | noncoding | NR_027182       | LOC84989                                | chr10 | + |
| ASHG19A3A044017 | 0.038929 | 0.230384 | 3.509979 | down | noncoding | ENST00000404883 | ANXA2P3                                 | chr10 | + |
| ASHG19A3A044026 | 0.022482 | 0.18214  | 3.818296 | down | noncoding | ENST00000454107 | RP11-57G10.1                            | chr10 | + |
| ASHG19A3A044068 | 0.015155 | 0.152727 | 10.98292 | down | noncoding | ENST00000430943 | C10orf37                                | chr10 | + |
| ASHG19A3A044113 | 0.011785 | 0.138709 | 2.087223 | down | noncoding | ENST00000442133 | RP11-137L10.6                           | chr10 | + |
| ASHG19A3A044113 | 0.011785 | 0.138709 | 2.087223 | down | noncoding | ENST00000442133 | RP11-137L10.6                           | chr10 | + |
| ASHG19A3A044113 | 0.011785 | 0.138709 | 2.087223 | down | noncoding | ENST00000442133 | RP11-137L10.6                           | chr10 | + |
| ASHG19A3A044113 | 0.011785 | 0.138709 | 2.087223 | down | noncoding | ENST00000442133 | RP11-137L10.6                           | chr10 | + |
| ASHG19A3A044262 | 0.009094 | 0.125418 | 7.642342 | down | noncoding | HIT000009469    |                                         | chr10 | + |
| ASHG19A3A044264 | 0.009256 | 0.126124 | 3.261174 | down | noncoding | ENST00000354541 | RP11-149I23.3                           | chr10 | + |
| ASHG19A3A044340 | 0.000911 | 0.055207 | 2.599001 | down | noncoding | AF124819        |                                         | chr10 | + |
| ASHG19A3A044362 | 0.041994 | 0.238285 | 3.228205 | down | noncoding | ENST00000424567 | RP11-163G10.3                           | chr1  | - |
| ASHG19A3A044374 | 0.018491 | 0.166966 | 3.772486 | down | noncoding | uc001kpt.2      | chromosome 10 open<br>reading frame 139 | chr10 | + |
| ASHG19A3A044641 | 0.00085  | 0.054093 | 3.364377 | down | noncoding | ENST00000333854 | RP11-181G12.2                           | chr1  | - |
| ASHG19A3A044641 | 0.00085  | 0.054093 | 3.364377 | down | noncoding | ENST00000333854 | RP11-181G12.2                           | chr1  | - |
| ASHG19A3A044641 | 0.00085  | 0.054093 | 3.364377 | down | noncoding | ENST00000333854 | RP11-181G12.2                           | chr1  | - |
| ASHG19A3A044659 | 0.007951 | 0.118775 | 5.603111 | down | noncoding | ENST00000417351 | CTAGE7                                  | chr10 | + |
| ASHG19A3A044752 | 0.005223 | 0.100967 | 5.050505 | down | noncoding | ENST00000441772 | AC139143.2                              | chr11 | - |
| ASHG19A3A044932 | 0.007948 | 0.118775 | 6.40422  | down | noncoding | AL359337        |                                         | chr11 | - |

|                 |          |          |          |      |           |                 |              |       |   |
|-----------------|----------|----------|----------|------|-----------|-----------------|--------------|-------|---|
| ASHG19A3A044944 | 0.00289  | 0.081533 | 9.728115 | down | noncoding | AB073355        |              | chr11 | - |
| ASHG19A3A044969 | 0.016913 | 0.160364 | 4.242487 | down | noncoding | ENST00000396351 | AC100865.1   | chr11 | - |
| ASHG19A3A045126 | 0.003883 | 0.089011 | 2.914674 | down | noncoding | HIT000280604    |              | chr11 | - |
| ASHG19A3A045126 | 0.003883 | 0.089011 | 2.914674 | down | noncoding | HIT000280604    |              | chr11 | - |
| ASHG19A3A045291 | 0.037252 | 0.226789 | 3.214816 | down | noncoding | ENST00000413752 | RP4-666O22.1 | chr1  | - |
| ASHG19A3A045303 | 0.019174 | 0.1698   | 2.685124 | down | noncoding | uc001nxj.1      | CR936784     | chr11 | - |
| ASHG19A3A045441 | 0.001041 | 0.057323 | 20.70794 | down | noncoding | AK130416        |              | chr11 | - |
| ASHG19A3A045462 | 0.005495 | 0.102653 | 3.614238 | down | noncoding | uc001oqx.1      | BC073927     | chr11 | - |
| ASHG19A3A045462 | 0.005495 | 0.102653 | 3.614238 | down | noncoding | uc001oqx.1      | BC073927     | chr11 | - |
| ASHG19A3A045462 | 0.005495 | 0.102653 | 3.614238 | down | noncoding | uc001oqx.1      | BC073927     | chr11 | - |
| ASHG19A3A045598 | 0.040736 | 0.235403 | 4.473664 | down | noncoding | uc001pen.1      | AF086184     | chr11 | - |
| ASHG19A3A045598 | 0.040736 | 0.235403 | 4.473664 | down | noncoding | uc001pen.1      | AF086184     | chr11 | - |
| ASHG19A3A045671 | 0.049346 | 0.252234 | 2.176949 | down | noncoding | ENST00000415310 | AC009294.1   | chr11 | - |
| ASHG19A3A045875 | 0.004025 | 0.089819 | 2.091745 | down | noncoding | AF086183        |              | chr11 | - |
| ASHG19A3A045875 | 0.004025 | 0.089819 | 2.091745 | down | noncoding | AF086183        |              | chr11 | - |
| ASHG19A3A045875 | 0.004025 | 0.089819 | 2.091745 | down | noncoding | AF086183        |              | chr11 | - |
| ASHG19A3A045875 | 0.004025 | 0.089819 | 2.091745 | down | noncoding | AF086183        |              | chr11 | - |
| ASHG19A3A045901 | 0.004528 | 0.095403 | 2.970535 | down | noncoding | HIT000043100    |              | chr11 | - |
| ASHG19A3A045901 | 0.004528 | 0.095403 | 2.970535 | down | noncoding | HIT000043100    |              | chr11 | - |
| ASHG19A3A046011 | 0.001294 | 0.06217  | 2.733661 | down | noncoding | ENST00000439410 | AP006294.1   | chr11 | + |
| ASHG19A3A046160 | 0.030555 | 0.207557 | 5.069189 | down | noncoding | AK128814        |              | chr11 | + |
| ASHG19A3A046189 | 0.017166 | 0.161945 | 4.272684 | down | noncoding | CR608259        |              | chr11 | + |
| ASHG19A3A046263 | 0.011419 | 0.137292 | 5.302986 | down | noncoding | AK095453        |              | chr11 | + |
| ASHG19A3A046263 | 0.011419 | 0.137292 | 5.302986 | down | noncoding | AK095453        |              | chr11 | + |
| ASHG19A3A046263 | 0.011419 | 0.137292 | 5.302986 | down | noncoding | AK095453        |              | chr11 | + |
| ASHG19A3A046263 | 0.011419 | 0.137292 | 5.302986 | down | noncoding | AK095453        |              | chr11 | + |
| ASHG19A3A046263 | 0.011419 | 0.137292 | 5.302986 | down | noncoding | AK095453        |              | chr11 | + |
| ASHG19A3A046263 | 0.011419 | 0.137292 | 5.302986 | down | noncoding | AK095453        |              | chr11 | + |
| ASHG19A3A046263 | 0.011419 | 0.137292 | 5.302986 | down | noncoding | AK095453        |              | chr11 | + |
| ASHG19A3A046263 | 0.011419 | 0.137292 | 5.302986 | down | noncoding | AK095453        |              | chr11 | + |
| ASHG19A3A046275 | 0.040913 | 0.235885 | 3.71107  | down | noncoding | AK123567        |              | chr11 | + |
| ASHG19A3A046275 | 0.040913 | 0.235885 | 3.71107  | down | noncoding | AK123567        |              | chr11 | + |
| ASHG19A3A046275 | 0.040913 | 0.235885 | 3.71107  | down | noncoding | AK123567        |              | chr11 | + |

|                 |          |          |          |      |           |                 |                |       |   |
|-----------------|----------|----------|----------|------|-----------|-----------------|----------------|-------|---|
| ASHG19A3A046275 | 0.040913 | 0.235885 | 3.71107  | down | noncoding | AK123567        |                | chr11 | + |
| ASHG19A3A046275 | 0.040913 | 0.235885 | 3.71107  | down | noncoding | AK123567        |                | chr11 | + |
| ASHG19A3A046275 | 0.040913 | 0.235885 | 3.71107  | down | noncoding | AK123567        |                | chr11 | + |
| ASHG19A3A046275 | 0.040913 | 0.235885 | 3.71107  | down | noncoding | AK123567        |                | chr11 | + |
| ASHG19A3A046275 | 0.040913 | 0.235885 | 3.71107  | down | noncoding | AK123567        |                | chr11 | + |
| ASHG19A3A046830 | 0.03868  | 0.230253 | 2.942005 | down | noncoding | uc001pcf.2      | BC041984       | chr11 | + |
| ASHG19A3A046864 | 0.041842 | 0.23804  | 7.486897 | down | noncoding | ENST00000453850 | RP4-535B20.3   | chr1  | - |
| ASHG19A3A046900 | 0.046943 | 0.248431 | 2.603736 | down | noncoding | AJ293406        |                | chr11 | + |
| ASHG19A3A046995 | 0.027524 | 0.198387 | 18.56181 | down | noncoding | uc001pqq.1      | AK126420       | chr11 | + |
| ASHG19A3A047051 | 0.001431 | 0.062929 | 2.194791 | down | noncoding | ENST00000422107 | RP4-677H15.4   | chr1  | - |
| ASHG19A3A047051 | 0.001431 | 0.062929 | 2.194791 | down | noncoding | ENST00000422107 | RP4-677H15.4   | chr1  | - |
| ASHG19A3A047276 | 0.001754 | 0.06735  | 2.129986 | down | noncoding | ENST00000479743 | RP11-113C12.1  | chr12 | - |
| ASHG19A3A047405 | 0.009285 | 0.12631  | 5.442654 | down | noncoding | NR_024064       | DAD1L          | chr12 | - |
| ASHG19A3A047405 | 0.009285 | 0.12631  | 5.442654 | down | noncoding | NR_024064       | DAD1L          | chr12 | - |
| ASHG19A3A047405 | 0.009285 | 0.12631  | 5.442654 | down | noncoding | NR_024064       | DAD1L          | chr12 | - |
| ASHG19A3A047408 | 0.015545 | 0.154305 | 6.63341  | down | noncoding | ENST00000431536 | RP4-706L14.2   | chr1  | - |
| ASHG19A3A047523 | 0.028024 | 0.199722 | 2.672499 | down | noncoding | uc001diz.3      | BC036594       | chr1  | - |
| ASHG19A3A047528 | 0.001026 | 0.057323 | 3.023191 | down | noncoding | BC042023        |                | chr1  | - |
| ASHG19A3A047742 | 0.045039 | 0.243678 | 3.127871 | down | noncoding | uc001sqo.2      | CR602022       | chr12 | - |
| ASHG19A3A047778 | 0.004555 | 0.09548  | 6.779348 | down | noncoding | ENST00000417216 | RBMS1P1        | chr12 | - |
| ASHG19A3A047778 | 0.004555 | 0.09548  | 6.779348 | down | noncoding | ENST00000417216 | RBMS1P1        | chr12 | - |
| ASHG19A3A047816 | 0.003797 | 0.088847 | 5.176577 | down | noncoding | ENST00000435350 | AC087886.1     | chr12 | - |
| ASHG19A3A047972 | 0.022573 | 0.182257 | 3.119957 | down | noncoding | uc001tma.2      | AK055712       | chr12 | - |
| ASHG19A3A048046 | 0.038885 | 0.230384 | 2.220403 | down | noncoding | ENST00000486088 | RP11-1028N23.1 | chr12 | - |
| ASHG19A3A048292 | 0.021184 | 0.176756 | 3.254332 | down | noncoding | ENST00000504533 | U47924.7       | chr12 | + |
| ASHG19A3A048327 | 0.041089 | 0.236584 | 3.234059 | down | noncoding | NR_026788       | FAM66C         | chr12 | + |
| ASHG19A3A048336 | 0.015448 | 0.153961 | 41.30951 | down | noncoding | uc009zgg.1      | RIMKLB         | chr12 | + |
| ASHG19A3A048347 | 0.044436 | 0.24227  | 2.513113 | down | noncoding | ENST00000449232 | RP11-374C13.1  | chr1  | - |
| ASHG19A3A048584 | 0.026661 | 0.195521 | 5.055162 | down | noncoding | ENST00000484004 | RP5-871P9.1    | chr1  | - |
| ASHG19A3A048873 | 0.047903 | 0.249813 | 2.372537 | down | noncoding | ENST00000485945 | RP11-613M5.2   | chr12 | + |
| ASHG19A3A048978 | 0.032304 | 0.21224  | 5.097007 | down | noncoding | ENST00000432567 | RP11-364B6.3   | chr1  | - |
| ASHG19A3A049007 | 0.001292 | 0.06217  | 6.23109  | down | noncoding | AK123931        |                | chr12 | + |
| ASHG19A3A049245 | 0.023037 | 0.183353 | 2.900678 | down | noncoding | ENST00000452841 | RP11-442J17.1  | chr13 | - |

|                 |          |          |          |      |           |                 |               |       |   |
|-----------------|----------|----------|----------|------|-----------|-----------------|---------------|-------|---|
| ASHG19A3A049485 | 0.009065 | 0.12525  | 8.714871 | down | noncoding | ENST00000400429 | RP11-74J13.2  | chr13 | - |
| ASHG19A3A049522 | 0.015497 | 0.154038 | 2.852348 | down | noncoding | AK057884        |               | chr13 | - |
| ASHG19A3A049522 | 0.015497 | 0.154038 | 2.852348 | down | noncoding | AK057884        |               | chr13 | - |
| ASHG19A3A049637 | 0.014207 | 0.147861 | 26.85351 | down | noncoding | AF070632        |               | chr1  | - |
| ASHG19A3A049708 | 0.015351 | 0.153863 | 2.644502 | down | noncoding | ENST00000414323 | RP11-72M14.1  | chr1  | - |
| ASHG19A3A049769 | 0.041705 | 0.23771  | 3.076499 | down | noncoding | ENST00000430810 | RP11-295B17.4 | chr13 | - |
| ASHG19A3A049853 | 0.043357 | 0.239621 | 2.885406 | down | noncoding | AK125472        |               | chr13 | - |
| ASHG19A3A049878 | 0.012757 | 0.143078 | 12.37485 | down | noncoding | AK092053        |               | chr13 | - |
| ASHG19A3A049943 | 0.00173  | 0.067157 | 5.038536 | down | noncoding | G36555          |               | chr13 | + |
| ASHG19A3A050182 | 0.007202 | 0.113881 | 2.378545 | down | noncoding | ENST00000436946 | RP11-236M15.1 | chr13 | + |
| ASHG19A3A050271 | 0.032149 | 0.212008 | 2.433872 | down | noncoding | ENST00000424532 | RP11-430K22.2 | chr13 | + |
| ASHG19A3A050297 | 0.009783 | 0.129005 | 2.254783 | down | noncoding | ENST00000419499 | RP11-459P23.1 | chr13 | + |
| ASHG19A3A050305 | 0.000385 | 0.042812 | 2.097002 | down | noncoding | ENST00000499458 | AL137244.1    | chr13 | + |
| ASHG19A3A050305 | 0.000385 | 0.042812 | 2.097002 | down | noncoding | ENST00000499458 | AL137244.1    | chr13 | + |
| ASHG19A3A050337 | 0.04503  | 0.243678 | 4.295851 | down | noncoding | ENST00000452282 | RP11-173N7.1  | chr13 | + |
| ASHG19A3A050530 | 0.014456 | 0.148815 | 3.018801 | down | noncoding | AK090595        |               | chr13 | + |
| ASHG19A3A050619 | 0.012832 | 0.143152 | 2.072243 | down | noncoding | uc001ehx.1      | CR598865      | chr1  | - |
| ASHG19A3A050725 | 0.003154 | 0.082688 | 2.088119 | down | noncoding | uc001wvd.2      | BC015671      | chr14 | - |
| ASHG19A3A050725 | 0.003154 | 0.082688 | 2.088119 | down | noncoding | uc001wvd.2      | BC015671      | chr14 | - |
| ASHG19A3A050725 | 0.003154 | 0.082688 | 2.088119 | down | noncoding | uc001wvd.2      | BC015671      | chr14 | - |
| ASHG19A3A050725 | 0.003154 | 0.082688 | 2.088119 | down | noncoding | uc001wvd.2      | BC015671      | chr14 | - |
| ASHG19A3A050780 | 0.005441 | 0.102582 | 3.767627 | down | noncoding | AK022437        |               | chr14 | - |
| ASHG19A3A050780 | 0.005441 | 0.102582 | 3.767627 | down | noncoding | AK022437        |               | chr14 | - |
| ASHG19A3A050857 | 0.001994 | 0.070561 | 3.515333 | down | noncoding | U85044          |               | chr14 | - |
| ASHG19A3A050857 | 0.001994 | 0.070561 | 3.515333 | down | noncoding | U85044          |               | chr14 | - |
| ASHG19A3A050938 | 0.000122 | 0.031585 | 34.5203  | down | noncoding | uc010arh.1      | AK024141      | chr14 | - |
| ASHG19A3A050946 | 0.044313 | 0.242041 | 2.028324 | down | noncoding | uc001xnx.2      | BC044305      | chr14 | - |
| ASHG19A3A051006 | 0.000962 | 0.056677 | 3.332491 | down | noncoding | uc001elu.1      | AX747132      | chr1  | - |
| ASHG19A3A051034 | 0.033451 | 0.214768 | 2.683517 | down | noncoding | G36692          |               | chr14 | - |
| ASHG19A3A051073 | 0.02456  | 0.188533 | 4.675818 | down | noncoding | BC014090        |               | chr14 | - |
| ASHG19A3A051159 | 0.008568 | 0.122132 | 2.369026 | down | noncoding | ENST00000447626 | RP11-661D19.1 | chr14 | - |
| ASHG19A3A051262 | 0.028633 | 0.201801 | 2.847589 | down | noncoding | ENST00000480068 | RP11-689J19.1 | chr14 | + |
| ASHG19A3A051262 | 0.028633 | 0.201801 | 2.847589 | down | noncoding | ENST00000480068 | RP11-689J19.1 | chr14 | + |

|                 |          |          |          |      |           |                 |               |       |   |
|-----------------|----------|----------|----------|------|-----------|-----------------|---------------|-------|---|
| ASHG19A3A051330 | 0.005671 | 0.103871 | 4.138465 | down | noncoding | NR_024442       | LOC728989     | chr1  | - |
| ASHG19A3A051350 | 0.042138 | 0.238285 | 2.452051 | down | noncoding | uc001wqo.2      | CR625477      | chr14 | + |
| ASHG19A3A051731 | 0.043072 | 0.238904 | 6.057288 | down | noncoding | CR603341        |               | chr14 | + |
| ASHG19A3A051784 | 0.000645 | 0.050176 | 8.264106 | down | noncoding | NR_033359       | MEG3          | chr14 | + |
| ASHG19A3A051785 | 0.00239  | 0.074687 | 2.84253  | down | noncoding | CR620657        |               | chr14 | + |
| ASHG19A3A051788 | 0.004112 | 0.090799 | 2.178032 | down | noncoding | NR_024149       | MEG8          | chr14 | + |
| ASHG19A3A051931 | 0.026946 | 0.196393 | 2.028621 | down | noncoding | ENST00000397937 | AC136896.2    | chr15 | - |
| ASHG19A3A052015 | 0.04273  | 0.238571 | 2.116592 | down | noncoding | ENST00000471253 | RP11-133K1.1  | chr15 | - |
| ASHG19A3A052048 | 0.003478 | 0.085354 | 34.82423 | down | noncoding | ENST00000417705 | RP11-54O7.3   | chr1  | - |
| ASHG19A3A052109 | 0.012149 | 0.14084  | 6.010033 | down | noncoding | BC042520        |               | chr15 | - |
| ASHG19A3A052323 | 0.001392 | 0.06264  | 7.99503  | down | noncoding | ENST00000500759 | AC027237.1    | chr15 | - |
| ASHG19A3A052323 | 0.001392 | 0.06264  | 7.99503  | down | noncoding | ENST00000500759 | AC027237.1    | chr15 | - |
| ASHG19A3A052323 | 0.001392 | 0.06264  | 7.99503  | down | noncoding | ENST00000500759 | AC027237.1    | chr15 | - |
| ASHG19A3A052323 | 0.001392 | 0.06264  | 7.99503  | down | noncoding | ENST00000500759 | AC027237.1    | chr15 | - |
| ASHG19A3A052329 | 0.042702 | 0.238507 | 4.415361 | down | noncoding | ENST00000513467 | AC009434.1    | chr15 | - |
| ASHG19A3A052426 | 0.019001 | 0.168942 | 2.333645 | down | noncoding | AL355738        |               | chr15 | - |
| ASHG19A3A052449 | 0.018101 | 0.166283 | 3.258839 | down | noncoding | ENST00000493002 | RP11-591L14.1 | chr15 | - |
| ASHG19A3A052656 | 9.33E-05 | 0.029823 | 9.276166 | down | noncoding | AF319524        |               | chr15 | + |
| ASHG19A3A052693 | 0.009851 | 0.129437 | 4.341265 | down | noncoding | uc001zej.2      | BC018626      | chr15 | + |
| ASHG19A3A052723 | 0.020516 | 0.174085 | 12.74628 | down | noncoding | uc001zgs.1      | BC037839      | chr15 | + |
| ASHG19A3A052760 | 0.004061 | 0.090256 | 61.29226 | down | noncoding | BC015134        |               | chr15 | + |
| ASHG19A3A052768 | 0.010218 | 0.130859 | 2.409871 | down | noncoding | uc001zlf.1      | AL832909      | chr15 | + |
| ASHG19A3A052890 | 0.001591 | 0.065335 | 4.366128 | down | noncoding | AF090911        |               | chr15 | + |
| ASHG19A3A052923 | 0.006379 | 0.109654 | 2.456248 | down | noncoding | NR_002188       | GBAP1         | chr1  | - |
| ASHG19A3A052958 | 0.009516 | 0.127832 | 2.25459  | down | noncoding | AK056250        |               | chr1  | - |
| ASHG19A3A053030 | 0.008374 | 0.121518 | 7.555235 | down | noncoding | G36947          |               | chr15 | + |
| ASHG19A3A053030 | 0.008374 | 0.121518 | 7.555235 | down | noncoding | G36947          |               | chr15 | + |
| ASHG19A3A053125 | 0.005513 | 0.102738 | 3.629733 | down | noncoding | uc001flf.2      | BC041646      | chr1  | - |
| ASHG19A3A053143 | 0.04596  | 0.245388 | 2.343269 | down | noncoding | NR_028330       | C15orf37      | chr15 | + |
| ASHG19A3A053143 | 0.04596  | 0.245388 | 2.343269 | down | noncoding | NR_028330       | C15orf37      | chr15 | + |
| ASHG19A3A053143 | 0.04596  | 0.245388 | 2.343269 | down | noncoding | NR_028330       | C15orf37      | chr15 | + |
| ASHG19A3A053425 | 0.001431 | 0.062929 | 2.900928 | down | noncoding | ENST00000407390 | AC025283.2    | chr16 | - |
| ASHG19A3A053436 | 0.011884 | 0.139623 | 4.366891 | down | noncoding | BC012429        |               | chr16 | - |



|                  |          |          |          |      |           |                 |               |       |   |
|------------------|----------|----------|----------|------|-----------|-----------------|---------------|-------|---|
| ASHG19A3A053539  | 0.036272 | 0.223527 | 2.86519  | down | noncoding | G36733          |               | chr16 | - |
| ASHG19A3A053655  | 0.009772 | 0.129005 | 3.959807 | down | noncoding | NR_002556       | LOC388242     | chr16 | - |
| ASHG19A3A053655  | 0.009772 | 0.129005 | 3.959807 | down | noncoding | NR_002556       | LOC388242     | chr16 | - |
| ASHG19A3A053894  | 0.001774 | 0.067459 | 2.428627 | down | noncoding | ENST00000494583 | RP11-529K1.1  | chr16 | - |
| ASHG19A3A053927  | 0.003846 | 0.089011 | 2.36405  | down | noncoding | NR_027265       | GLG1          | chr16 | - |
| ASHG19A3A053927  | 0.003846 | 0.089011 | 2.36405  | down | noncoding | NR_027265       | GLG1          | chr16 | - |
| ASHG19A3A053927  | 0.003846 | 0.089011 | 2.36405  | down | noncoding | NR_027265       | GLG1          | chr16 | - |
| ASHG19A3A054027  | 0.014094 | 0.147514 | 2.235527 | down | noncoding | ENST00000484096 | RP11-568J23.1 | chr16 | - |
| ASHG19A3A054145  | 0.011    | 0.135071 | 5.024681 | down | noncoding | uc002ckl.1      | CR596832      | chr16 | + |
| ASHG19A3A054390  | 0.007327 | 0.114264 | 3.050813 | down | noncoding | ENST00000502891 | AC008870.1    | chr16 | + |
| ASHG19A3A054390  | 0.007327 | 0.114264 | 3.050813 | down | noncoding | ENST00000502891 | AC008870.1    | chr16 | + |
| ASHG19A3A054429  | 0.005508 | 0.102738 | 2.754958 | down | noncoding | CR590687        |               | chr16 | + |
| ASHG19A3A054573  | 0.012563 | 0.142131 | 2.158562 | down | noncoding | ENST00000434394 | RP11-331H2.3  | chr1  | - |
| ASHG19A3A054616  | 0.002941 | 0.081974 | 87.4809  | down | noncoding | NR_001447       | MT1L          | chr16 | + |
| ASHG19A3A054898  | 0.025785 | 0.193125 | 2.560496 | down | noncoding | ENST00000504545 | AC138028.1    | chr16 | + |
| ASHG19A3A054899  | 0.020497 | 0.174085 | 3.797844 | down | noncoding | NR_024399       | MGC23284      | chr16 | + |
| ASHG19A3A054899  | 0.020497 | 0.174085 | 3.797844 | down | noncoding | NR_024399       | MGC23284      | chr16 | + |
| ASHG19A3A054987  | 0.008689 | 0.122758 | 2.689043 | down | noncoding | NR_028502       | C17orf91      | chr17 | - |
| ASHG19A3A054987  | 0.008689 | 0.122758 | 2.689043 | down | noncoding | NR_028502       | C17orf91      | chr17 | - |
| ASHG19A3A054988  | 0.001997 | 0.070561 | 7.645748 | down | noncoding | NR_028504       | C17orf91      | chr17 | - |
| ASHG19A3A054988  | 0.001997 | 0.070561 | 7.645748 | down | noncoding | NR_028504       | C17orf91      | chr17 | - |
| ASHG19A3A055116  | 0.045578 | 0.244393 | 2.316783 | down | noncoding | uc001yuj.1      | IGH           | chr15 | - |
| ASHG19A3A055187  | 0.003639 | 0.087309 | 2.662583 | down | noncoding | uc003but.2      | CICE          | chr3  | - |
| ASHG19A3A055187  | 0.003639 | 0.087309 | 2.662583 | down | noncoding | uc003but.2      | CICE          | chr3  | - |
| ASHG19A3A055195  | 0.004378 | 0.094352 | 2.656326 | down | noncoding | ENST00000507702 | C4orf10       | chr4  | + |
| ASHG19A3A055229  | 0.000693 | 0.051279 | 2.170607 | down | noncoding | uc003qir.2      | BC039503      | chr6  | + |
| ASHG19A3A055248  | 0.028442 | 0.201305 | 3.235438 | down | noncoding | uc004apn.1      | L25629        | chr9  | + |
| ASHG19A3A055279  | 0.045815 | 0.245047 | 2.440397 | down | noncoding | uc010fjq.2      | LIMS3         | chr2  | + |
| ASHG19A3A055279  | 0.045815 | 0.245047 | 2.440397 | down | noncoding | uc010fjq.2      | LIMS3         | chr2  | + |
| ASHG19A3A055303  | 0.003181 | 0.08323  | 2.585502 | down | noncoding | uc010txe.1      | MEG3          | chr14 | + |
| ASHG19A3A055309  | 0.001479 | 0.063664 | 7.850217 | down | noncoding | uc010vhg.1      | MTE           | chr16 | + |
| ASHG19A3H0000118 | 0.000109 | 0.031537 | 2.081386 | down | noncoding | nc-HOXC11-116-  | nc-HOXC11-116 | chr12 | + |
| ASHG19A3L0000086 | 0.010051 | 0.130183 | 3.677443 | down | noncoding | BI048312        | lincRNA-WNT9A | chr1  | + |

|                  |          |          |          |      |           |          |                  |       |   |
|------------------|----------|----------|----------|------|-----------|----------|------------------|-------|---|
| ASHG19A3L0000086 | 0.010051 | 0.130183 | 3.677443 | down | noncoding | BI048312 | lincRNA-WNT9A    | chr1  | + |
| ASHG19A3L0000086 | 0.010051 | 0.130183 | 3.677443 | down | noncoding | BI048312 | lincRNA-WNT9A    | chr1  | + |
| ASHG19A3L0000086 | 0.010051 | 0.130183 | 3.677443 | down | noncoding | BI048312 | lincRNA-WNT9A    | chr1  | + |
| ASHG19A3L0000086 | 0.010051 | 0.130183 | 3.677443 | down | noncoding | BI048312 | lincRNA-WNT9A    | chr1  | + |
| ASHG19A3L0000086 | 0.010051 | 0.130183 | 3.677443 | down | noncoding | BI048312 | lincRNA-WNT9A    | chr1  | + |
| ASHG19A3L0000086 | 0.010051 | 0.130183 | 3.677443 | down | noncoding | BI048312 | lincRNA-WNT9A    | chr1  | + |
| ASHG19A3L0000086 | 0.010051 | 0.130183 | 3.677443 | down | noncoding | BI048312 | lincRNA-WNT9A    | chr1  | + |
| ASHG19A3L0000086 | 0.010051 | 0.130183 | 3.677443 | down | noncoding | BI048312 | lincRNA-WNT9A    | chr1  | + |
| ASHG19A3L0000086 | 0.010051 | 0.130183 | 3.677443 | down | noncoding | BI048312 | lincRNA-WNT9A    | chr1  | + |
| ASHG19A3L0000183 | 0.003041 | 0.082215 | 2.489694 | down | noncoding | BC036122 | lincRNA-LRRC8D-2 | chr1  | + |
| ASHG19A3L0000325 | 0.01163  | 0.138082 | 5.014368 | down | noncoding | AK302893 | lincRNA-MICAL2-1 | chr11 | + |
| ASHG19A3L0000481 | 0.010076 | 0.130347 | 4.706431 | down | noncoding | AK297025 | lincRNA-FGD4     | chr12 | + |
| ASHG19A3L0000534 | 0.000931 | 0.055903 | 10.18482 | down | noncoding | AA405014 | lincRNA-TMTC2    | chr12 | - |
| ASHG19A3L0000808 | 0.028186 | 0.200153 | 3.092472 | down | noncoding | AK226132 | lincRNA-ZFP106   | chr15 | - |
| ASHG19A3L0001156 | 0.014395 | 0.148592 | 5.074471 | down | noncoding | AB058771 | lincRNA-B3GNT7   | chr2  | + |
| ASHG19A3L0001362 | 1.97E-05 | 0.014795 | 13.60183 | down | noncoding | BX641108 | lincRNA-TPRG1-2  | chr3  | + |
| ASHG19A3L0001362 | 1.97E-05 | 0.014795 | 13.60183 | down | noncoding | BX641108 | lincRNA-TPRG1-2  | chr3  | + |
| ASHG19A3L0001362 | 1.97E-05 | 0.014795 | 13.60183 | down | noncoding | BX641108 | lincRNA-TPRG1-2  | chr3  | + |
| ASHG19A3L0001362 | 1.97E-05 | 0.014795 | 13.60183 | down | noncoding | BX641108 | lincRNA-TPRG1-2  | chr3  | + |
| ASHG19A3L0001414 | 0.000541 | 0.04646  | 2.722835 | down | noncoding | BI753279 | lincRNA-EIF4E3-2 | chr3  | + |
| ASHG19A3L0001595 | 0.033479 | 0.214768 | 3.541889 | down | noncoding | AK225978 | lincRNA-SPARC    | chr5  | + |
| ASHG19A3L0001595 | 0.033479 | 0.214768 | 3.541889 | down | noncoding | AK225978 | lincRNA-SPARC    | chr5  | + |
| ASHG19A3L0001595 | 0.033479 | 0.214768 | 3.541889 | down | noncoding | AK225978 | lincRNA-SPARC    | chr5  | + |
| ASHG19A3L0001595 | 0.033479 | 0.214768 | 3.541889 | down | noncoding | AK225978 | lincRNA-SPARC    | chr5  | + |
| ASHG19A3L0001595 | 0.033479 | 0.214768 | 3.541889 | down | noncoding | AK225978 | lincRNA-SPARC    | chr5  | + |
| ASHG19A3L0001595 | 0.033479 | 0.214768 | 3.541889 | down | noncoding | AK225978 | lincRNA-SPARC    | chr5  | + |
| ASHG19A3L0001595 | 0.033479 | 0.214768 | 3.541889 | down | noncoding | AK225978 | lincRNA-SPARC    | chr5  | + |
| ASHG19A3L0001595 | 0.033479 | 0.214768 | 3.541889 | down | noncoding | AK225978 | lincRNA-SPARC    | chr5  | + |
| ASHG19A3L0003228 | 0.000316 | 0.039856 | 2.625938 | down | noncoding | AK289744 | lincRNA-SUN2     | chr22 | - |
| ASHG19A3L0003228 | 0.000316 | 0.039856 | 2.625938 | down | noncoding | AK289744 | lincRNA-SUN2     | chr22 | - |
| ASHG19A3L0003228 | 0.000316 | 0.039856 | 2.625938 | down | noncoding | AK289744 | lincRNA-SUN2     | chr22 | - |
| ASHG19A3L0003228 | 0.000316 | 0.039856 | 2.625938 | down | noncoding | AK289744 | lincRNA-SUN2     | chr22 | - |

|                      |          |          |          |      |           |                          |                 |       |   |
|----------------------|----------|----------|----------|------|-----------|--------------------------|-----------------|-------|---|
| ASHG19A3L0003327     | 0.018548 | 0.166966 | 2.032522 | down | noncoding | chr19:22497397-22499384+ | lincRNA-ZNF98   | chr19 | + |
| ASHG19A3L0003398     | 0.013155 | 0.144636 | 4.390163 | down | noncoding | AI218855                 | lincRNA-RPS14-2 | chr5  | - |
| CUST_187_P1426075208 | 0.008428 | 0.121805 | 9.407727 | down | noncoding | nc-HOXD4-22+             | nc-HOXD4-22     | chr2  | - |
| CUST_187_P1426075208 | 0.008428 | 0.121805 | 9.407727 | down | noncoding | nc-HOXD4-22+             | nc-HOXD4-22     | chr2  | - |
| CUST_187_P1426075208 | 0.008428 | 0.121805 | 9.407727 | down | noncoding | nc-HOXD4-22+             | nc-HOXD4-22     | chr2  | - |
| CUST_188_P1426075208 | 0.007598 | 0.115434 | 2.454258 | down | noncoding | nc-HOXD4-23+             | nc-HOXD4-23     | chr2  | - |
| CUST_201_P1426075208 | 0.039821 | 0.233165 | 4.937065 | down | noncoding | nc-HOXD8-20+             | nc-HOXD8-20     | chr2  | - |
| CUST_278_P1426073487 | 0.0012   | 0.06047  | 3.308688 | down | noncoding | uc.280+                  | uc.280          | chr9  | + |
| CUST_278_P1426073487 | 0.0012   | 0.06047  | 3.308688 | down | noncoding | uc.280+                  | uc.280          | chr9  | + |
| CUST_43_P1426073487  | 0.024665 | 0.188902 | 3.22484  | down | noncoding | uc.45+                   | uc.45           | chr1  | + |
| CUST_43_P1426073487  | 0.024665 | 0.188902 | 3.22484  | down | noncoding | uc.45+                   | uc.45           | chr1  | + |
| CUST_470_P1426073487 | 0.020358 | 0.174085 | 2.486254 | down | noncoding | uc.472+                  | uc.472          | chrX  | + |
| CUST_470_P1426073487 | 0.020358 | 0.174085 | 2.486254 | down | noncoding | uc.472+                  | uc.472          | chrX  | + |
| CUST_470_P1426073487 | 0.020358 | 0.174085 | 2.486254 | down | noncoding | uc.472+                  | uc.472          | chrX  | + |
| CUST_633_P1426073487 | 0.013868 | 0.146786 | 2.33579  | down | noncoding | uc.154-                  | uc.154          | chr5  | - |
| CUST_633_P1426073487 | 0.013868 | 0.146786 | 2.33579  | down | noncoding | uc.154-                  | uc.154          | chr5  | - |
| CUST_652_P1426073487 | 0.011195 | 0.135489 | 3.517401 | down | noncoding | uc.173-                  | uc.173          | chr5  | - |
| CUST_725_P1426073487 | 0.033583 | 0.214768 | 2.494235 | down | noncoding | uc.246-                  | uc.246          | chr8  | - |
| CUST_817_P1426073487 | 0.033788 | 0.215485 | 3.631841 | down | noncoding | uc.338-                  | uc.338          | chr12 | - |
| CUST_817_P1426073487 | 0.033788 | 0.215485 | 3.631841 | down | noncoding | uc.338-                  | uc.338          | chr12 | - |
| CUST_817_P1426073487 | 0.033788 | 0.215485 | 3.631841 | down | noncoding | uc.338-                  | uc.338          | chr12 | - |
| CUST_817_P1426073487 | 0.033788 | 0.215485 | 3.631841 | down | noncoding | uc.338-                  | uc.338          | chr12 | - |
| CUST_817_P1426073487 | 0.033788 | 0.215485 | 3.631841 | down | noncoding | uc.338-                  | uc.338          | chr12 | - |
| CUST_817_P1426073487 | 0.033788 | 0.215485 | 3.631841 | down | noncoding | uc.338-                  | uc.338          | chr12 | - |
| CUST_817_P1426073487 | 0.033788 | 0.215485 | 3.631841 | down | noncoding | uc.338-                  | uc.338          | chr12 | - |
| CUST_95_P1426075208  | 0.018938 | 0.168786 | 2.500969 | down | noncoding | nc-HOXB9-199+            | nc-HOXB9-199    | chr17 | + |

**Supplementary Table 2. The list of lncRNAs regulated by MYC in HCT116.**

# Fold Change cut-off: 2.0

# P-value cut-off: 0.05

# Condition pairs: CRC\_vs\_Normal

# ProbeName it represents probe name.

# P-value, P-value calculated from unpaired t-test.

# FDR, FDR is calculated from Benjamini Hochberg FDR.

# FC (abs), the absolute ratio (no log scale) of normalized intensities between two conditions.

# Regulation, it depicts which group has greater or lower intensity values wrt other group.

**Supplementary Table 2-1. The list of lncRNAs upregulated by MYC knockdown (downregulated by MYC) in HCT116.**

| ProbeName       | P-value and FDR |          | Fold change and Regulation |            | type      | seqname         | GeneSymbol | chrom | strand |
|-----------------|-----------------|----------|----------------------------|------------|-----------|-----------------|------------|-------|--------|
|                 | p-value         | FDR      | FCAbsolute                 | regulation |           |                 |            |       |        |
| ASHG19A3A000199 | 0.000563        | 0.037057 | 2.017265                   | up         | noncoding | ENST00000430151 | HLA-K      | chr6  | +      |
| ASHG19A3A000494 | 0.019802        | 0.179923 | 3.137632                   | up         | noncoding | ENST00000512530 | AC007497.1 | chr16 | +      |
| ASHG19A3A000494 | 0.019802        | 0.179923 | 3.137632                   | up         | noncoding | ENST00000512530 | AC007497.1 | chr16 | +      |
| ASHG19A3A008039 | 0.004164        | 0.084406 | 2.015549                   | up         | noncoding | uc002gva.1      | BC058012   | chr17 | -      |
| ASHG19A3A008508 | 4.04E-05        | 0.018643 | 2.241927                   | up         | noncoding | AK000839        |            | chr17 | -      |
| ASHG19A3A008836 | 0.000185        | 0.028311 | 2.803208                   | up         | noncoding | uc002juh.2      | BC041417   | chr17 | -      |
| ASHG19A3A008836 | 0.000185        | 0.028311 | 2.803208                   | up         | noncoding | uc002juh.2      | BC041417   | chr17 | -      |
| ASHG19A3A009560 | 0.012169        | 0.138481 | 2.216662                   | up         | noncoding | uc010wia.1      | AK027091   | chr17 | +      |
| ASHG19A3A013496 | 0.001119        | 0.050055 | 2.293798                   | up         | noncoding | CR603904        |            | chr2  | -      |
| ASHG19A3A013970 | 0.001767        | 0.060443 | 2.082581                   | up         | noncoding | ENST00000417574 | AC111200.7 | chr2  | -      |
| ASHG19A3A013970 | 0.001767        | 0.060443 | 2.082581                   | up         | noncoding | ENST00000417574 | AC111200.7 | chr2  | -      |
| ASHG19A3A015940 | 4.34E-05        | 0.018643 | 2.020596                   | up         | noncoding | ENST00000431142 | AC108479.2 | chr2  | +      |

|                 |          |          |          |    |           |                 |                     |       |   |
|-----------------|----------|----------|----------|----|-----------|-----------------|---------------------|-------|---|
| ASHG19A3A016026 | 0.005924 | 0.099524 | 2.001573 | up | noncoding | uc002syc.1      | BC039374            | chr2  | + |
| ASHG19A3A017894 | 0.000514 | 0.036159 | 3.367631 | up | noncoding | ENST00000431361 | RP5-885L7.11        | chr20 | - |
| ASHG19A3A019494 | 0.000127 | 0.024495 | 2.786413 | up | noncoding | ENST00000434754 | XXbac-<br>B33L19.10 | chr22 | - |
| ASHG19A3A020145 | 0.000996 | 0.047955 | 2.26848  | up | noncoding | ENST00000457627 | AP000552.7          | chr22 | + |
| ASHG19A3A021090 | 4.66E-05 | 0.018796 | 5.334716 | up | noncoding | ENST00000421735 | U73167.7            | chr3  | - |
| ASHG19A3A021090 | 4.66E-05 | 0.018796 | 5.334716 | up | noncoding | ENST00000421735 | U73167.7            | chr3  | - |
| ASHG19A3A021776 | 0.001482 | 0.057397 | 2.138887 | up | noncoding | AK056150        |                     | chr1  | + |
| ASHG19A3A022071 | 0.026219 | 0.203277 | 2.410596 | up | noncoding | HIT000097222    |                     | chr3  | - |
| ASHG19A3A022374 | 0.005698 | 0.098373 | 2.076622 | up | noncoding | ENST00000425396 | AC093416.3          | chr3  | + |
| ASHG19A3A023873 | 0.004785 | 0.090119 | 2.011103 | up | noncoding | ENST00000514073 | AC226119.4          | chr4  | - |
| ASHG19A3A027163 | 0.02991  | 0.217116 | 2.14159  | up | noncoding | ENST00000512863 | RP11-474J18.4       | chr5  | - |
| ASHG19A3A028512 | 0.022711 | 0.190558 | 2.615294 | up | noncoding | CR624187        |                     | chr5  | + |
| ASHG19A3A029575 | 0.00085  | 0.043696 | 2.076509 | up | noncoding | ENST00000405092 | RP1-193B12.5        | chr6  | - |
| ASHG19A3A029632 | 0.00296  | 0.074349 | 2.520881 | up | noncoding | ENST00000441380 | IFITM4P             | chr6  | - |
| ASHG19A3A029633 | 4.06E-05 | 0.018643 | 2.22908  | up | noncoding | NR_001590       | IFITM4P             | chr6  | - |
| ASHG19A3A029813 | 7.67E-05 | 0.02304  | 2.226069 | up | noncoding | ENST00000339867 | RP3-391O22.3        | chr6  | - |
| ASHG19A3A030189 | 0.031582 | 0.223077 | 2.008133 | up | noncoding | ENST00000415381 | RP11-301M17.1       | chr1  | + |
| ASHG19A3A031215 | 0.000291 | 0.031912 | 2.204207 | up | noncoding | ENST00000429037 | HLA-90              | chr6  | + |
| ASHG19A3A031628 | 0.002206 | 0.065842 | 2.08374  | up | noncoding | NR_033327       | EFHC1               | chr6  | + |
| ASHG19A3A031628 | 0.002206 | 0.065842 | 2.08374  | up | noncoding | NR_033327       | EFHC1               | chr6  | + |
| ASHG19A3A031863 | 0.008285 | 0.115005 | 3.241657 | up | noncoding | ENST00000413107 | RP11-758C21.1       | chr6  | + |
| ASHG19A3A032427 | 0.000552 | 0.036814 | 2.042036 | up | noncoding | AK024405        |                     | chr7  | - |
| ASHG19A3A032455 | 0.002526 | 0.06949  | 2.041729 | up | noncoding | ENST00000490376 | RP11-740N7.3        | chr7  | - |
| ASHG19A3A032860 | 0.005894 | 0.099319 | 3.627916 | up | noncoding | ENST00000433031 | RP11-1217F2.1       | chr7  | - |
| ASHG19A3A034012 | 0.005446 | 0.096221 | 2.012757 | up | noncoding | CR622072        |                     | chr7  | + |
| ASHG19A3A034265 | 0.001049 | 0.048635 | 2.095644 | up | noncoding | ENST00000445938 | AC017116.11         | chr7  | + |
| ASHG19A3A034274 | 0.003629 | 0.080236 | 2.501207 | up | noncoding | ENST00000413189 | RP4-781L3.1         | chr1  | - |
| ASHG19A3A034368 | 0.002822 | 0.07278  | 2.369199 | up | noncoding | ENST00000442064 | RP4-725G10.3        | chr7  | + |
| ASHG19A3A037374 | 0.004172 | 0.084406 | 2.150761 | up | noncoding | ENST00000507347 | CTD-2173L22.1       | chr9  | - |
| ASHG19A3A038204 | 0.017552 | 0.170277 | 2.84764  | up | noncoding | uc004cgv.3      | AK308497            | chr9  | - |
| ASHG19A3A039112 | 0.000841 | 0.043638 | 2.318056 | up | noncoding | AK098037        |                     | chr9  | + |
| ASHG19A3A039112 | 0.000841 | 0.043638 | 2.318056 | up | noncoding | AK098037        |                     | chr9  | + |

|                  |          |          |          |    |           |                 |                 |       |   |
|------------------|----------|----------|----------|----|-----------|-----------------|-----------------|-------|---|
| ASHG19A3A040123  | 0.006571 | 0.103872 | 2.876674 | up | noncoding | ENST00000399580 | RP11-62C22.1    | chrX  | - |
| ASHG19A3A040456  | 0.005214 | 0.093706 | 2.048666 | up | noncoding | ENST00000435597 | RP11-1114A5.4   | chrX  | - |
| ASHG19A3A040757  | 0.000891 | 0.044744 | 2.596254 | up | noncoding | NR_027783       | SAT1            | chrX  | + |
| ASHG19A3A041020  | 0.000124 | 0.024243 | 2.247585 | up | noncoding | ENST00000366761 | AL136378.2      | chr1  | + |
| ASHG19A3A041020  | 0.000124 | 0.024243 | 2.247585 | up | noncoding | ENST00000366761 | AL136378.2      | chr1  | + |
| ASHG19A3A041823  | 5.45E-05 | 0.020077 | 2.038077 | up | noncoding | ENST00000434155 | AC012068.2      | chrY  | - |
| ASHG19A3A044434  | 2.5E-05  | 0.018643 | 2.039652 | up | noncoding | ENST00000369884 | CYP17A1OS       | chr10 | + |
| ASHG19A3A045606  | 0.002221 | 0.065924 | 2.014532 | up | noncoding | uc001pfj.2      | CR603982        | chr11 | - |
| ASHG19A3A045974  | 0.002889 | 0.073546 | 2.208289 | up | noncoding | AK057652        |                 | chr1  | - |
| ASHG19A3A046263  | 0.00161  | 0.058485 | 2.408616 | up | noncoding | AK095453        |                 | chr11 | + |
| ASHG19A3A046263  | 0.00161  | 0.058485 | 2.408616 | up | noncoding | AK095453        |                 | chr11 | + |
| ASHG19A3A046263  | 0.00161  | 0.058485 | 2.408616 | up | noncoding | AK095453        |                 | chr11 | + |
| ASHG19A3A046263  | 0.00161  | 0.058485 | 2.408616 | up | noncoding | AK095453        |                 | chr11 | + |
| ASHG19A3A046263  | 0.00161  | 0.058485 | 2.408616 | up | noncoding | AK095453        |                 | chr11 | + |
| ASHG19A3A046263  | 0.00161  | 0.058485 | 2.408616 | up | noncoding | AK095453        |                 | chr11 | + |
| ASHG19A3A046263  | 0.00161  | 0.058485 | 2.408616 | up | noncoding | AK095453        |                 | chr11 | + |
| ASHG19A3A046263  | 0.00161  | 0.058485 | 2.408616 | up | noncoding | AK095453        |                 | chr11 | + |
| ASHG19A3A052124  | 0.001949 | 0.062641 | 2.212647 | up | noncoding | AL109705        |                 | chr15 | - |
| ASHG19A3A052124  | 0.001949 | 0.062641 | 2.212647 | up | noncoding | AL109705        |                 | chr15 | - |
| ASHG19A3A052923  | 1.11E-05 | 0.018643 | 2.321991 | up | noncoding | NR_002188       | GBAP1           | chr1  | - |
| ASHG19A3A053561  | 0.0001   | 0.024021 | 2.016137 | up | noncoding | AK027199        |                 | chr16 | - |
| ASHG19A3A055195  | 0.006935 | 0.10663  | 2.383615 | up | noncoding | ENST00000507702 | C4orf10         | chr4  | + |
| ASHG19A3A055216  | 0.000233 | 0.029695 | 2.300963 | up | noncoding | uc003myw.2      | BC037167        | chr6  | + |
| ASHG19A3A055216  | 0.000233 | 0.029695 | 2.300963 | up | noncoding | uc003myw.2      | BC037167        | chr6  | + |
| ASHG19A3A055216  | 0.000233 | 0.029695 | 2.300963 | up | noncoding | uc003myw.2      | BC037167        | chr6  | + |
| ASHG19A3A055219  | 0.000222 | 0.029256 | 2.192829 | up | noncoding | uc003nov.3      | HLA-F           | chr6  | + |
| ASHG19A3H0000044 | 0.01067  | 0.129544 | 2.20826  | up | noncoding | nc-HOXB2-164-   | nc-HOXB2-164    | chr17 | - |
| ASHG19A3H0000090 | 0.000492 | 0.035742 | 2.419742 | up | noncoding | nc-HOXB4-168-   | nc-HOXB4-168    | chr17 | - |
| ASHG19A3H0000203 | 0.044498 | 0.264263 | 2.255156 | up | noncoding | nc-HOXD9-17-    | nc-HOXD9-17     | chr2  | + |
| ASHG19A3L0000820 | 0.028893 | 0.212408 | 2.467595 | up | noncoding | BC036541        | lincRNA-ZNF280D | chr15 | - |
| ASHG19A3L0000820 | 0.028893 | 0.212408 | 2.467595 | up | noncoding | BC036541        | lincRNA-ZNF280D | chr15 | - |
| ASHG19A3L0000820 | 0.028893 | 0.212408 | 2.467595 | up | noncoding | BC036541        | lincRNA-        | chr15 | - |

|                      |          |          |          |    |           |                           |                 |       |   |
|----------------------|----------|----------|----------|----|-----------|---------------------------|-----------------|-------|---|
| ASHG19A3L0000820     | 0.028893 | 0.212408 | 2.467595 | up | noncoding | BC036541                  | ZNF280D         | chr15 | - |
| ASHG19A3L0000820     | 0.028893 | 0.212408 | 2.467595 | up | noncoding | BC036541                  | lincRNA-ZNF280D | chr15 | - |
| ASHG19A3L0000820     | 0.028893 | 0.212408 | 2.467595 | up | noncoding | BC036541                  | lincRNA-ZNF280D | chr15 | - |
| ASHG19A3L0000820     | 0.028893 | 0.212408 | 2.467595 | up | noncoding | BC036541                  | lincRNA-ZNF280D | chr15 | - |
| ASHG19A3L0001033     | 0.033168 | 0.227984 | 2.198509 | up | noncoding | chr2:107718693-107737818+ | lincRNA-RGPD4-2 | chr2  | + |
| CUST_454_PI426073487 | 0.00546  | 0.096364 | 2.626805 | up | noncoding | uc.456+                   | uc.456          | chr20 | + |

**Supplementary Table 2-2. The list of lncRNAs downregulated by c-MYC knockdown (upregulated by c-MYC) in HCT116.**

| ProbeName       | P-value and FDR |          | Fold change and Regulation |            | type      | seqname         | GeneSymbol   | chrom | strand |
|-----------------|-----------------|----------|----------------------------|------------|-----------|-----------------|--------------|-------|--------|
|                 | p-value         | FDR      | FCAbsolute                 | regulation |           |                 |              |       |        |
| ASHG19A3A000082 | 0.040231        | 0.251132 | 2.274344                   | down       | noncoding | ENST00000400783 | AC097374.2   | chr2  | -      |
| ASHG19A3A000371 | 0.006859        | 0.106334 | 2.237174                   | down       | noncoding | ENST00000457804 | RP11-322I2.1 | chr10 | +      |
| ASHG19A3A000426 | 1.91E-05        | 0.018643 | 3.013427                   | down       | noncoding | ENST00000501177 | AC108084.1   | chr16 | -      |
| ASHG19A3A000437 | 4.18E-05        | 0.018643 | 2.91158                    | down       | noncoding | ENST00000503797 | RP11-115G5.1 | chr4  | -      |
| ASHG19A3A000508 | 0.00012         | 0.024021 | 2.881525                   | down       | noncoding | ENST00000514406 | AC123779.2   | chr8  | -      |
| ASHG19A3A007162 | 0.000109        | 0.024021 | 2.270137                   | down       | noncoding | NR_003697       | C7orf40      | chr7  | -      |
| ASHG19A3A007442 | 0.026151        | 0.203189 | 2.72713                    | down       | noncoding | NR_026931       | ALKBH2       | chr12 | -      |
| ASHG19A3A007442 | 0.026151        | 0.203189 | 2.72713                    | down       | noncoding | NR_026931       | ALKBH2       | chr12 | -      |
| ASHG19A3A007442 | 0.026151        | 0.203189 | 2.72713                    | down       | noncoding | NR_026931       | ALKBH2       | chr12 | -      |
| ASHG19A3A007442 | 0.026151        | 0.203189 | 2.72713                    | down       | noncoding | NR_026931       | ALKBH2       | chr12 | -      |
| ASHG19A3A007442 | 0.026151        | 0.203189 | 2.72713                    | down       | noncoding | NR_026931       | ALKBH2       | chr12 | -      |
| ASHG19A3A007504 | 5.4E-06         | 0.013518 | 3.402997                   | down       | noncoding | NR_027349       | MIR17HG      | chr13 | +      |
| ASHG19A3A007593 | 0.000315        | 0.032325 | 3.984488                   | down       | noncoding | NR_027910       | CALB2        | chr16 | +      |
| ASHG19A3A007593 | 0.000315        | 0.032325 | 3.984488                   | down       | noncoding | NR_027910       | CALB2        | chr16 | +      |
| ASHG19A3A007747 | 0.007812        | 0.111853 | 2.90777                    | down       | noncoding | NR_033249       | GCSH         | chr16 | -      |
| ASHG19A3A008259 | 0.038287        | 0.244797 | 2.047189                   | down       | noncoding | AK024690        |              | chr17 | -      |

|                 |          |          |          |      |           |                 |               |       |   |
|-----------------|----------|----------|----------|------|-----------|-----------------|---------------|-------|---|
| ASHG19A3A008259 | 0.038287 | 0.244797 | 2.047189 | down | noncoding | AK024690        |               | chr17 | - |
| ASHG19A3A008482 | 0.016622 | 0.165003 | 2.122172 | down | noncoding | uc002ilk.1      | AX748120      | chr17 | - |
| ASHG19A3A008482 | 0.016622 | 0.165003 | 2.122172 | down | noncoding | uc002ilk.1      | AX748120      | chr17 | - |
| ASHG19A3A008657 | 0.003384 | 0.078193 | 2.728499 | down | noncoding | NR_002999       | SCARNA20      | chr17 | - |
| ASHG19A3A009002 | 0.00071  | 0.040651 | 2.475946 | down | noncoding | ENST00000413077 | AC012146.7    | chr17 | + |
| ASHG19A3A009060 | 0.002059 | 0.064415 | 2.008288 | down | noncoding | U79273          |               | chr17 | + |
| ASHG19A3A009060 | 0.002059 | 0.064415 | 2.008288 | down | noncoding | U79273          |               | chr17 | + |
| ASHG19A3A009139 | 9.06E-06 | 0.018643 | 2.199228 | down | noncoding | NR_026880       | MGC12916      | chr17 | + |
| ASHG19A3A009686 | 0.000763 | 0.041786 | 2.233412 | down | noncoding | ENST00000515049 | RP11-304F15.5 | chr17 | + |
| ASHG19A3A009968 | 0.000419 | 0.035608 | 2.530851 | down | noncoding | AB073602        |               | chr17 | + |
| ASHG19A3A009982 | 0.001283 | 0.053246 | 2.158636 | down | noncoding | NR_027058       | C17orf86      | chr17 | + |
| ASHG19A3A009982 | 0.001283 | 0.053246 | 2.158636 | down | noncoding | NR_027058       | C17orf86      | chr17 | + |
| ASHG19A3A010004 | 0.018892 | 0.175531 | 2.166825 | down | noncoding | ENST00000479457 | RP11-450D21.1 | chr1  | - |
| ASHG19A3A010017 | 0.006173 | 0.100779 | 2.011119 | down | noncoding | AK124361        |               | chr17 | + |
| ASHG19A3A010171 | 0.002256 | 0.066531 | 2.426395 | down | noncoding | ENST00000399857 | AP001357.1    | chr18 | - |
| ASHG19A3A010460 | 0.000337 | 0.033299 | 3.532144 | down | noncoding | ENST00000425161 | RP11-343H5.6  | chr1  | - |
| ASHG19A3A010460 | 0.000337 | 0.033299 | 3.532144 | down | noncoding | ENST00000425161 | RP11-343H5.6  | chr1  | - |
| ASHG19A3A010489 | 8E-05    | 0.023106 | 3.024333 | down | noncoding | CR593590        |               | chr18 | + |
| ASHG19A3A011120 | 3.22E-05 | 0.018643 | 2.489126 | down | noncoding | BX640708        |               | chr19 | - |
| ASHG19A3A013825 | 0.004351 | 0.086138 | 2.067818 | down | noncoding | ENST00000422761 | AC007040.7    | chr2  | - |
| ASHG19A3A013848 | 0.000352 | 0.033833 | 2.844302 | down | noncoding | ENST00000453103 | AC073046.4    | chr2  | - |
| ASHG19A3A013848 | 0.000352 | 0.033833 | 2.844302 | down | noncoding | ENST00000453103 | AC073046.4    | chr2  | - |
| ASHG19A3A013860 | 0.002912 | 0.073865 | 2.236995 | down | noncoding | ENST00000414130 | AC005041.10   | chr2  | - |
| ASHG19A3A013990 | 0.000583 | 0.037388 | 2.064166 | down | noncoding | uc001abs.2      | AK091100      | chr1  | + |
| ASHG19A3A014202 | 0.000301 | 0.03198  | 2.028582 | down | noncoding | uc002the.2      | LOC541471     | chr2  | - |
| ASHG19A3A014260 | 0.032009 | 0.224484 | 2.136927 | down | noncoding | G36767          |               | chr2  | - |
| ASHG19A3A014260 | 0.032009 | 0.224484 | 2.136927 | down | noncoding | G36767          |               | chr2  | - |
| ASHG19A3A014260 | 0.032009 | 0.224484 | 2.136927 | down | noncoding | G36767          |               | chr2  | - |
| ASHG19A3A014884 | 4.09E-05 | 0.018643 | 3.045718 | down | noncoding | AF086549        |               | chr2  | - |
| ASHG19A3A015051 | 4.12E-05 | 0.018643 | 4.098347 | down | noncoding | HIT000098852    |               | chr2  | - |
| ASHG19A3A015052 | 0.000396 | 0.035162 | 3.165391 | down | noncoding | AK090760        |               | chr2  | - |
| ASHG19A3A015582 | 0.049534 | 0.280632 | 2.021646 | down | noncoding | ENST00000450782 | RP11-340B24.3 | chr1  | + |
| ASHG19A3A016165 | 0.000107 | 0.024021 | 2.130734 | down | noncoding | uc002tfi.3      | AK056084      | chr2  | + |



|                 |          |          |          |      |           |                 |               |       |   |
|-----------------|----------|----------|----------|------|-----------|-----------------|---------------|-------|---|
| ASHG19A3A016166 | 0.001862 | 0.062097 | 2.181304 | down | noncoding | ENST00000436665 | AC013268.5    | chr2  | + |
| ASHG19A3A017270 | 0.000379 | 0.034986 | 2.206407 | down | noncoding | AK021907        |               | chr20 | - |
| ASHG19A3A017655 | 0.000992 | 0.047955 | 2.259914 | down | noncoding | uc002xig.3      | LOC388796     | chr20 | - |
| ASHG19A3A017659 | 0.003697 | 0.080477 | 2.182246 | down | noncoding | BC071821        |               | chr20 | - |
| ASHG19A3A017659 | 0.003697 | 0.080477 | 2.182246 | down | noncoding | BC071821        |               | chr20 | - |
| ASHG19A3A017663 | 0.003306 | 0.077336 | 2.507642 | down | noncoding | ENST00000421494 | HSPEP1        | chr20 | - |
| ASHG19A3A017977 | 6.15E-05 | 0.020516 | 2.542543 | down | noncoding | NR_027700       | NOP56         | chr20 | + |
| ASHG19A3A018266 | 0.005478 | 0.096458 | 2.016948 | down | noncoding | ENST00000424137 | BXDC1P        | chr20 | + |
| ASHG19A3A018897 | 0.002464 | 0.069163 | 2.191489 | down | noncoding | NR_002909       | SNHG3         | chr1  | + |
| ASHG19A3A019347 | 0.001436 | 0.056754 | 2.234768 | down | noncoding | NR_026547       | C21orf90      | chr21 | + |
| ASHG19A3A020283 | 0.011989 | 0.137642 | 2.556643 | down | noncoding | NR_026962       | LOC284900     | chr22 | + |
| ASHG19A3A020288 | 0.003216 | 0.076753 | 2.083415 | down | noncoding | ENST00000458080 | CTA-292E10.6  | chr22 | + |
| ASHG19A3A020288 | 0.003216 | 0.076753 | 2.083415 | down | noncoding | ENST00000458080 | CTA-292E10.6  | chr22 | + |
| ASHG19A3A020505 | 0.024157 | 0.196607 | 2.402698 | down | noncoding | AF052148        |               | chr22 | + |
| ASHG19A3A020636 | 0.004569 | 0.087751 | 7.813613 | down | noncoding | ENST00000426177 | RP11-306H5.1  | chr3  | - |
| ASHG19A3A020788 | 0.000111 | 0.024021 | 2.014607 | down | noncoding | ENST00000393779 | AC104297.1    | chr3  | - |
| ASHG19A3A021044 | 0.000637 | 0.0384   | 2.24325  | down | noncoding | uc001chr.2      | AF086102      | chr1  | + |
| ASHG19A3A021313 | 0.018996 | 0.175678 | 2.040654 | down | noncoding | ENST00000468470 | RP11-159G9.4  | chr3  | - |
| ASHG19A3A021370 | 0.015755 | 0.160038 | 2.275568 | down | noncoding | NR_028303       | LOC100302640  | chr3  | - |
| ASHG19A3A021836 | 0.000114 | 0.024021 | 2.903847 | down | noncoding | ENST00000487061 | RP11-6F2.3    | chr3  | - |
| ASHG19A3A022107 | 0.001307 | 0.053506 | 2.105874 | down | noncoding | ENST00000418353 | RP11-135A1.2  | chr3  | - |
| ASHG19A3A022243 | 0.00113  | 0.050055 | 2.182996 | down | noncoding | AK128690        |               | chr3  | + |
| ASHG19A3A022485 | 0.014903 | 0.155491 | 2.102504 | down | noncoding | HIT000092017    |               | chr3  | + |
| ASHG19A3A023486 | 0.006834 | 0.106334 | 2.078898 | down | noncoding | ENST00000454471 | RP11-450H5.2  | chr3  | + |
| ASHG19A3A024179 | 0.000105 | 0.024021 | 2.689181 | down | noncoding | ENST00000454756 | AC104066.1    | chr4  | - |
| ASHG19A3A024387 | 0.005975 | 0.099662 | 2.198081 | down | noncoding | BC043279        |               | chr4  | - |
| ASHG19A3A024387 | 0.005975 | 0.099662 | 2.198081 | down | noncoding | BC043279        |               | chr4  | - |
| ASHG19A3A025516 | 0.017048 | 0.16678  | 2.377363 | down | noncoding | ENST00000444958 | KIAA0114      | chr4  | + |
| ASHG19A3A025529 | 0.000118 | 0.024021 | 2.165969 | down | noncoding | ENST00000493291 | RP11-601I15.1 | chr4  | + |
| ASHG19A3A025664 | 0.005686 | 0.098359 | 2.056781 | down | noncoding | ENST00000430198 | HMGA1L2       | chr4  | + |
| ASHG19A3A025664 | 0.005686 | 0.098359 | 2.056781 | down | noncoding | ENST00000430198 | HMGA1L2       | chr4  | + |
| ASHG19A3A026236 | 5.26E-06 | 0.013518 | 2.42773  | down | noncoding | ENST00000515543 | RP11-815N9.3  | chr4  | + |
| ASHG19A3A026327 | 0.001741 | 0.060107 | 2.281463 | down | noncoding | ENST00000513552 | RP11-753I4.1  | chr4  | + |

|                 |          |          |          |      |           |                 |               |      |   |
|-----------------|----------|----------|----------|------|-----------|-----------------|---------------|------|---|
| ASHG19A3A027046 | 0.007845 | 0.112186 | 2.103103 | down | noncoding | ENST00000510378 | RPS23P5       | chr5 | - |
| ASHG19A3A027296 | 0.004376 | 0.086138 | 2.066406 | down | noncoding | ENST00000503529 | CTC-210G5.1   | chr5 | - |
| ASHG19A3A027743 | 0.00021  | 0.029256 | 3.103727 | down | noncoding | uc003mgt.2      | BC041422      | chr5 | - |
| ASHG19A3A027743 | 0.00021  | 0.029256 | 3.103727 | down | noncoding | uc003mgt.2      | BC041422      | chr5 | - |
| ASHG19A3A027743 | 0.00021  | 0.029256 | 3.103727 | down | noncoding | uc003mgt.2      | BC041422      | chr5 | - |
| ASHG19A3A027743 | 0.00021  | 0.029256 | 3.103727 | down | noncoding | uc003mgt.2      | BC041422      | chr5 | - |
| ASHG19A3A027743 | 0.00021  | 0.029256 | 3.103727 | down | noncoding | uc003mgt.2      | BC041422      | chr5 | - |
| ASHG19A3A027743 | 0.00021  | 0.029256 | 3.103727 | down | noncoding | uc003mgt.2      | BC041422      | chr5 | - |
| ASHG19A3A027896 | 0.000757 | 0.041783 | 2.140852 | down | noncoding | AK125452        |               | chr5 | + |
| ASHG19A3A028338 | 0.014468 | 0.152808 | 2.20798  | down | noncoding | uc001edc.1      | BC047723      | chr1 | + |
| ASHG19A3A028338 | 0.014468 | 0.152808 | 2.20798  | down | noncoding | uc001edc.1      | BC047723      | chr1 | + |
| ASHG19A3A028520 | 0.001574 | 0.058205 | 2.085501 | down | noncoding | ENST00000395970 | AC008500.1    | chr5 | + |
| ASHG19A3A028617 | 0.006088 | 0.10027  | 2.074838 | down | noncoding | NR_015370       | NCRNA00219    | chr5 | + |
| ASHG19A3A028618 | 0.000629 | 0.038258 | 2.355921 | down | noncoding | ENST00000413221 | NCRNA00219    | chr5 | + |
| ASHG19A3A028827 | 0.000132 | 0.024829 | 2.410724 | down | noncoding | AK092789        |               | chr5 | + |
| ASHG19A3A028827 | 0.000132 | 0.024829 | 2.410724 | down | noncoding | AK092789        |               | chr5 | + |
| ASHG19A3A028827 | 0.000132 | 0.024829 | 2.410724 | down | noncoding | AK092789        |               | chr5 | + |
| ASHG19A3A028827 | 0.000132 | 0.024829 | 2.410724 | down | noncoding | AK092789        |               | chr5 | + |
| ASHG19A3A028882 | 0.000188 | 0.028311 | 2.39712  | down | noncoding | AK123765        |               | chr1 | + |
| ASHG19A3A029023 | 0.000963 | 0.047404 | 2.555463 | down | noncoding | AK055194        |               | chr1 | + |
| ASHG19A3A029343 | 0.02391  | 0.195987 | 2.200637 | down | noncoding | ENST00000404787 | RP1-140K8.2   | chr6 | - |
| ASHG19A3A029375 | 0.004167 | 0.084406 | 2.296957 | down | noncoding | ENST00000407097 | RP11-320C15.1 | chr6 | - |
| ASHG19A3A029387 | 0.004461 | 0.086752 | 2.593491 | down | noncoding | NR_003703       | SCARNA27      | chr6 | - |
| ASHG19A3A029387 | 0.004461 | 0.086752 | 2.593491 | down | noncoding | NR_003703       | SCARNA27      | chr6 | - |
| ASHG19A3A029809 | 0.021438 | 0.185451 | 2.30793  | down | noncoding | AK025759        |               | chr6 | - |
| ASHG19A3A029844 | 0.034047 | 0.231941 | 2.095789 | down | noncoding | AK056236        |               | chr6 | - |
| ASHG19A3A029895 | 0.001514 | 0.057397 | 3.325704 | down | noncoding | ENST00000440194 | RP11-328M4.2  | chr6 | - |
| ASHG19A3A029895 | 0.001514 | 0.057397 | 3.325704 | down | noncoding | ENST00000440194 | RP11-328M4.2  | chr6 | - |
| ASHG19A3A029895 | 0.001514 | 0.057397 | 3.325704 | down | noncoding | ENST00000440194 | RP11-328M4.2  | chr6 | - |
| ASHG19A3A030533 | 0.003929 | 0.082373 | 2.866055 | down | noncoding | AK129530        |               | chr6 | - |
| ASHG19A3A030728 | 0.004237 | 0.084966 | 2.024644 | down | noncoding | AK124909        |               | chr6 | - |
| ASHG19A3A031389 | 0.036054 | 0.23865  | 3.070639 | down | noncoding | ENST00000429998 | RP11-513I15.6 | chr6 | + |
| ASHG19A3A031674 | 8.82E-05 | 0.024021 | 2.128389 | down | noncoding | ENST00000444820 | RP11-442B12.1 | chr6 | + |

|                 |          |          |          |      |           |                 |               |      |   |
|-----------------|----------|----------|----------|------|-----------|-----------------|---------------|------|---|
| ASHG19A3A032321 | 0.009164 | 0.121311 | 2.012604 | down | noncoding | G43611          |               | chr6 | + |
| ASHG19A3A032369 | 0.000139 | 0.024883 | 2.675762 | down | noncoding | ENST00000462565 | AC093627.9    | chr7 | - |
| ASHG19A3A032394 | 0.000214 | 0.029256 | 3.025514 | down | noncoding | ENST00000453348 | AC074389.9    | chr7 | - |
| ASHG19A3A032601 | 0.000589 | 0.037483 | 2.509309 | down | noncoding | ENST00000450406 | AC073150.6    | chr7 | - |
| ASHG19A3A033116 | 0.000109 | 0.024021 | 2.084207 | down | noncoding | uc003uig.2      | BC035377      | chr7 | - |
| ASHG19A3A033116 | 0.000109 | 0.024021 | 2.084207 | down | noncoding | uc003uig.2      | BC035377      | chr7 | - |
| ASHG19A3A033116 | 0.000109 | 0.024021 | 2.084207 | down | noncoding | uc003uig.2      | BC035377      | chr7 | - |
| ASHG19A3A033267 | 0.000511 | 0.036159 | 2.006793 | down | noncoding | ENST00000412754 | RP11-126L15.4 | chr7 | - |
| ASHG19A3A034763 | 0.003642 | 0.080236 | 2.425386 | down | noncoding | AK096529        |               | chr7 | + |
| ASHG19A3A034763 | 0.003642 | 0.080236 | 2.425386 | down | noncoding | AK096529        |               | chr7 | + |
| ASHG19A3A034763 | 0.003642 | 0.080236 | 2.425386 | down | noncoding | AK096529        |               | chr7 | + |
| ASHG19A3A035027 | 0.001689 | 0.059538 | 2.275492 | down | noncoding | ENST00000478818 | EFCAB3        | chr7 | + |
| ASHG19A3A035241 | 0.009902 | 0.124903 | 2.464553 | down | noncoding | ENST00000462572 | RP11-307I2.2  | chr7 | + |
| ASHG19A3A035353 | 0.000262 | 0.030488 | 2.922981 | down | noncoding | ENST00000467458 | RP11-796I2.2  | chr7 | + |
| ASHG19A3A035363 | 0.010766 | 0.129669 | 2.04143  | down | noncoding | ENST00000477993 | FABP5L3       | chr7 | + |
| ASHG19A3A035408 | 0.013028 | 0.144406 | 2.9376   | down | noncoding | BC094870        |               | chr7 | + |
| ASHG19A3A035737 | 0.002106 | 0.064836 | 2.152423 | down | noncoding | ENST00000505046 | RP11-783P22.1 | chr8 | - |
| ASHG19A3A035869 | 0.006206 | 0.101019 | 2.717236 | down | noncoding | HIT000389365    |               | chr8 | - |
| ASHG19A3A036543 | 0.006114 | 0.10027  | 2.411664 | down | noncoding | BC015455        |               | chr8 | + |
| ASHG19A3A036947 | 0.008185 | 0.114351 | 2.107676 | down | noncoding | uc010meg.2      | CR619813      | chr8 | + |
| ASHG19A3A036947 | 0.008185 | 0.114351 | 2.107676 | down | noncoding | uc010meg.2      | CR619813      | chr8 | + |
| ASHG19A3A037063 | 0.001071 | 0.049332 | 2.604694 | down | noncoding | AK021913        |               | chr9 | - |
| ASHG19A3A037064 | 0.000301 | 0.03198  | 2.531632 | down | noncoding | BC045653        |               | chr9 | - |
| ASHG19A3A037065 | 0.006514 | 0.10358  | 3.212884 | down | noncoding | BC034707        |               | chr9 | - |
| ASHG19A3A037085 | 0.000134 | 0.024829 | 2.304157 | down | noncoding | ENST00000422953 | RP11-39K24.9  | chr9 | - |
| ASHG19A3A037151 | 0.000519 | 0.036159 | 3.616969 | down | noncoding | NR_003009       | SCARNA8       | chr9 | - |
| ASHG19A3A037995 | 0.000765 | 0.041786 | 2.669721 | down | noncoding | AK123875        |               | chr9 | - |
| ASHG19A3A038424 | 0.001819 | 0.061532 | 2.130336 | down | noncoding | ENST00000427983 | RP11-473O3.1  | chr9 | + |
| ASHG19A3A038468 | 3.86E-05 | 0.018643 | 2.047819 | down | noncoding | BC030746        |               | chr9 | + |
| ASHG19A3A038568 | 0.007253 | 0.108539 | 2.559295 | down | noncoding | uc004aaa.2      | BC014180      | chr9 | + |
| ASHG19A3A038655 | 0.000312 | 0.032286 | 2.012922 | down | noncoding | uc004adi.3      | FAM27E3       | chr9 | + |
| ASHG19A3A038656 | 0.007066 | 0.107256 | 2.341534 | down | noncoding | ENST00000421848 | RP11-374M1.4  | chr9 | + |
| ASHG19A3A039668 | 2.53E-05 | 0.018643 | 2.115835 | down | noncoding | NR_023358       | SCARNA9L      | chrX | - |



|                 |          |          |          |      |           |                 |               |       |   |
|-----------------|----------|----------|----------|------|-----------|-----------------|---------------|-------|---|
| ASHG19A3A045142 | 0.001202 | 0.051719 | 2.167283 | down | noncoding | ENST00000413181 | AC135977.1    | chr11 | - |
| ASHG19A3A045231 | 0.000227 | 0.029324 | 2.030851 | down | noncoding | ENST00000458175 | AP000640.1    | chr11 | - |
| ASHG19A3A045231 | 0.000227 | 0.029324 | 2.030851 | down | noncoding | ENST00000458175 | AP000640.1    | chr11 | - |
| ASHG19A3A045304 | 0.003506 | 0.079534 | 2.175969 | down | noncoding | ENST00000435576 | RP4-683M8.1   | chr1  | - |
| ASHG19A3A045403 | 0.040025 | 0.25049  | 2.391066 | down | noncoding | ENST00000393967 | AP001157.3    | chr11 | - |
| ASHG19A3A045689 | 0.000384 | 0.034986 | 2.111987 | down | noncoding | ENST00000428428 | PPIHP1        | chr11 | - |
| ASHG19A3A045868 | 0.015192 | 0.155978 | 3.238504 | down | noncoding | AK127847        |               | chr11 | - |
| ASHG19A3A046198 | 0.001364 | 0.055202 | 2.163716 | down | noncoding | uc001mow.1      | AK097654      | chr11 | + |
| ASHG19A3A047254 | 0.00075  | 0.041544 | 2.228388 | down | noncoding | NR_003010       | SCARNA12      | chr12 | - |
| ASHG19A3A047254 | 0.00075  | 0.041544 | 2.228388 | down | noncoding | NR_003010       | SCARNA12      | chr12 | - |
| ASHG19A3A047447 | 1.25E-05 | 0.018643 | 2.146197 | down | noncoding | ENST00000419107 | RP11-472F19.1 | chr1  | - |
| ASHG19A3A048056 | 0.000612 | 0.038165 | 3.225339 | down | noncoding | AK094730        |               | chr12 | - |
| ASHG19A3A048072 | 0.040963 | 0.252778 | 2.969401 | down | noncoding | CR598968        |               | chr12 | - |
| ASHG19A3A048152 | 0.001894 | 0.062594 | 2.401207 | down | noncoding | ENST00000501992 | AC122688.1    | chr12 | - |
| ASHG19A3A048554 | 0.0016   | 0.058485 | 2.433533 | down | noncoding | ENST00000499273 | AC011603.2    | chr12 | + |
| ASHG19A3A048554 | 0.0016   | 0.058485 | 2.433533 | down | noncoding | ENST00000499273 | AC011603.2    | chr12 | + |
| ASHG19A3A048554 | 0.0016   | 0.058485 | 2.433533 | down | noncoding | ENST00000499273 | AC011603.2    | chr12 | + |
| ASHG19A3A048554 | 0.0016   | 0.058485 | 2.433533 | down | noncoding | ENST00000499273 | AC011603.2    | chr12 | + |
| ASHG19A3A048554 | 0.0016   | 0.058485 | 2.433533 | down | noncoding | ENST00000499273 | AC011603.2    | chr12 | + |
| ASHG19A3A048566 | 0.00012  | 0.024021 | 2.387967 | down | noncoding | NR_033267       | LOC100335030  | chr12 | + |
| ASHG19A3A048932 | 9.65E-05 | 0.024021 | 3.081294 | down | noncoding | ENST00000470084 | RP11-129B9.1  | chr12 | + |
| ASHG19A3A049043 | 0.00048  | 0.035742 | 3.117953 | down | noncoding | uc001trz.2      | AJ276555      | chr12 | + |
| ASHG19A3A049089 | 0.003222 | 0.076753 | 2.026229 | down | noncoding | BC053353        |               | chr1  | - |
| ASHG19A3A049376 | 0.000389 | 0.034986 | 9.073339 | down | noncoding | AK022310        |               | chr13 | - |
| ASHG19A3A049420 | 0.015111 | 0.155978 | 2.776176 | down | noncoding | ENST00000439831 | RP11-141M1.4  | chr13 | - |
| ASHG19A3A049765 | 4.09E-05 | 0.018643 | 2.037277 | down | noncoding | ENST00000432229 | RP11-111L24.3 | chr13 | - |
| ASHG19A3A049878 | 0.000411 | 0.035547 | 2.022411 | down | noncoding | AK092053        |               | chr13 | - |
| ASHG19A3A050188 | 2.47E-05 | 0.018643 | 2.557953 | down | noncoding | NR_002605       | DLEU1         | chr13 | + |
| ASHG19A3A050209 | 6E-05    | 0.020516 | 2.144924 | down | noncoding | ENST00000439042 | RP11-381L18.2 | chr13 | + |
| ASHG19A3A050209 | 6E-05    | 0.020516 | 2.144924 | down | noncoding | ENST00000439042 | RP11-381L18.2 | chr13 | + |
| ASHG19A3A050378 | 0.048493 | 0.277666 | 3.628139 | down | noncoding | NR_027350       | MIR17HG       | chr13 | + |
| ASHG19A3A050551 | 0.000403 | 0.035207 | 2.435864 | down | noncoding | NR_002312       | RPPH1         | chr14 | - |
| ASHG19A3A050551 | 0.000403 | 0.035207 | 2.435864 | down | noncoding | NR_002312       | RPPH1         | chr14 | - |

|                      |          |          |          |      |           |            |                |       |   |
|----------------------|----------|----------|----------|------|-----------|------------|----------------|-------|---|
| ASHG19A3A050815      | 0.001399 | 0.055891 | 2.186032 | down | noncoding | uc001xbz.2 | C14orf33       | chr14 | - |
| ASHG19A3A050815      | 0.001399 | 0.055891 | 2.186032 | down | noncoding | uc001xbz.2 | C14orf33       | chr14 | - |
| ASHG19A3A050815      | 0.001399 | 0.055891 | 2.186032 | down | noncoding | uc001xbz.2 | C14orf33       | chr14 | - |
| ASHG19A3A050815      | 0.001399 | 0.055891 | 2.186032 | down | noncoding | uc001xbz.2 | C14orf33       | chr14 | - |
| ASHG19A3A050816      | 0.0015   | 0.057397 | 2.318456 | down | noncoding | NR_027123  | C14orf33       | chr14 | - |
| ASHG19A3A050816      | 0.0015   | 0.057397 | 2.318456 | down | noncoding | NR_027123  | C14orf33       | chr14 | - |
| ASHG19A3A050816      | 0.0015   | 0.057397 | 2.318456 | down | noncoding | NR_027123  | C14orf33       | chr14 | - |
| ASHG19A3A050816      | 0.0015   | 0.057397 | 2.318456 | down | noncoding | NR_027123  | C14orf33       | chr14 | - |
| ASHG19A3A050894      | 0.006737 | 0.105406 | 2.014826 | down | noncoding | G43222     |                | chr14 | - |
| ASHG19A3A051108      | 0.00072  | 0.040817 | 2.434784 | down | noncoding | NR_026779  | C14orf139      | chr14 | - |
| ASHG19A3A052295      | 0.003413 | 0.078474 | 2.462751 | down | noncoding | NR_004388  | SCARNA14       | chr15 | - |
| ASHG19A3A052760      | 3.14E-06 | 0.011793 | 3.029637 | down | noncoding | BC015134   |                | chr15 | + |
| ASHG19A3A052838      | 0.000172 | 0.027481 | 3.083918 | down | noncoding | uc001zsy.2 | BC062349       | chr15 | + |
| ASHG19A3A052838      | 0.000172 | 0.027481 | 3.083918 | down | noncoding | uc001zsy.2 | BC062349       | chr15 | + |
| ASHG19A3A053140      | 0.003049 | 0.075673 | 2.240793 | down | noncoding | AL109713   |                | chr15 | + |
| ASHG19A3A053737      | 0.000456 | 0.035632 | 2.26129  | down | noncoding | AK093598   |                | chr16 | - |
| ASHG19A3A053984      | 0.001242 | 0.052678 | 2.027038 | down | noncoding | NR_033247  | LOC100329108   | chr16 | - |
| ASHG19A3A054863      | 0.001869 | 0.062097 | 2.341124 | down | noncoding | AF052103   |                | chr16 | + |
| ASHG19A3A055053      | 0.001737 | 0.060107 | 2.020393 | down | noncoding | U23864     |                | chr8  | + |
| ASHG19A3A055053      | 0.001737 | 0.060107 | 2.020393 | down | noncoding | U23864     |                | chr8  | + |
| ASHG19A3A055053      | 0.001737 | 0.060107 | 2.020393 | down | noncoding | U23864     |                | chr8  | + |
| ASHG19A3A055132      | 0.00061  | 0.038165 | 2.432834 | down | noncoding | uc002ehu.1 | PNAS-108       | chr16 | - |
| ASHG19A3L0000810     | 0.00296  | 0.074349 | 2.376687 | down | noncoding | CR741480   | lincRNA-FBN1   | chr15 | - |
| ASHG19A3L0001126     | 0.000249 | 0.030488 | 2.252127 | down | noncoding | DB027866   | lincRNA-SDPR-2 | chr2  | + |
| ASHG19A3L0002222     | 0.005619 | 0.098168 | 3.063093 | down | noncoding | AK021739   | lincRNA-JAK2-2 | chr9  | + |
| ASHG19A3L0002851     | 0.000636 | 0.0384   | 2.258101 | down | noncoding | AK125219   | lincRNA-HAUS7  | chrX  | - |
| ASHG19A3L0002851     | 0.000636 | 0.0384   | 2.258101 | down | noncoding | AK125219   | lincRNA-HAUS7  | chrX  | - |
| CUST_339_PI426073487 | 0.041864 | 0.255382 | 2.010776 | down | noncoding | uc.341+    | uc.341         | chr12 | + |



|                 |          |          |          |    |           |                 |               |       |   |
|-----------------|----------|----------|----------|----|-----------|-----------------|---------------|-------|---|
| ASHG19A3A007245 | 0.012353 | 0.112173 | 2.058932 | up | noncoding | NR_024142       | NCRNA00081    | chr10 | - |
| ASHG19A3A007276 | 0.006722 | 0.084068 | 2.111212 | up | noncoding | NR_024240       | HLA-J         | chr6  | + |
| ASHG19A3A007344 | 0.000446 | 0.029788 | 2.347034 | up | noncoding | ENST00000465539 | ZNF271        | chr18 | + |
| ASHG19A3A007344 | 0.000446 | 0.029788 | 2.347034 | up | noncoding | ENST00000465539 | ZNF271        | chr18 | + |
| ASHG19A3A007345 | 0.004952 | 0.073128 | 2.432584 | up | noncoding | NR_024566       | ZNF271        | chr18 | + |
| ASHG19A3A007345 | 0.004952 | 0.073128 | 2.432584 | up | noncoding | NR_024566       | ZNF271        | chr18 | + |
| ASHG19A3A007355 | 0.041661 | 0.192595 | 2.539343 | up | noncoding | NR_024601       | DIABLO        | chr12 | - |
| ASHG19A3A007355 | 0.041661 | 0.192595 | 2.539343 | up | noncoding | NR_024601       | DIABLO        | chr12 | - |
| ASHG19A3A007610 | 0.012308 | 0.111948 | 2.292819 | up | noncoding | NR_028027       | CREBZF        | chr11 | - |
| ASHG19A3A007677 | 7.86E-05 | 0.021847 | 3.817335 | up | noncoding | NR_028503       | C17orf91      | chr17 | - |
| ASHG19A3A007677 | 7.86E-05 | 0.021847 | 3.817335 | up | noncoding | NR_028503       | C17orf91      | chr17 | - |
| ASHG19A3A007678 | 0.000117 | 0.021847 | 2.910028 | up | noncoding | NR_028505       | C17orf91      | chr17 | - |
| ASHG19A3A007678 | 0.000117 | 0.021847 | 2.910028 | up | noncoding | NR_028505       | C17orf91      | chr17 | - |
| ASHG19A3A007882 | 0.031893 | 0.17088  | 2.204438 | up | noncoding | NR_024447       | LOC100128288  | chr17 | - |
| ASHG19A3A007910 | 0.010342 | 0.102124 | 2.203824 | up | noncoding | ENST00000450334 | RP4-798A17.5  | chr1  | - |
| ASHG19A3A007995 | 0.008938 | 0.096095 | 2.7581   | up | noncoding | ENST00000414673 | KRT16P2       | chr17 | - |
| ASHG19A3A008077 | 0.003607 | 0.06538  | 2.457461 | up | noncoding | ENST00000340898 | AC126365.2    | chr17 | - |
| ASHG19A3A008094 | 0.048221 | 0.208123 | 3.023487 | up | noncoding | U00949          |               | chr17 | - |
| ASHG19A3A008508 | 0.001739 | 0.04821  | 3.007466 | up | noncoding | AK000839        |               | chr17 | - |
| ASHG19A3A008642 | 0.001745 | 0.04821  | 2.536693 | up | noncoding | AF130062        |               | chr17 | - |
| ASHG19A3A008732 | 0.000843 | 0.038458 | 2.385413 | up | noncoding | ENST00000453838 | KRT18P28      | chr1  | - |
| ASHG19A3A008736 | 0.028782 | 0.162756 | 5.799156 | up | noncoding | HIT000016017    |               | chr17 | - |
| ASHG19A3A008836 | 0.004534 | 0.071744 | 2.548224 | up | noncoding | uc002juh.2      | BC041417      | chr17 | - |
| ASHG19A3A008836 | 0.004534 | 0.071744 | 2.548224 | up | noncoding | uc002juh.2      | BC041417      | chr17 | - |
| ASHG19A3A008883 | 0.000916 | 0.039493 | 2.113648 | up | noncoding | AK023363        |               | chr1  | - |
| ASHG19A3A009251 | 0.035714 | 0.179334 | 3.323271 | up | noncoding | uc010cqz.2      | AK310665      | chr17 | + |
| ASHG19A3A009264 | 0.014361 | 0.119422 | 5.834251 | up | noncoding | uc002gyd.1      | CR620692      | chr17 | + |
| ASHG19A3A009335 | 0.026581 | 0.157397 | 2.785018 | up | noncoding | ENST00000456678 | RP11-401A10.2 | chr1  | - |
| ASHG19A3A009342 | 0.000719 | 0.036619 | 2.157465 | up | noncoding | NR_033420       | SH3GL1P2      | chr17 | + |
| ASHG19A3A009701 | 0.022422 | 0.146012 | 5.706751 | up | noncoding | ENST00000511179 | RP11-893F2.7  | chr17 | + |
| ASHG19A3A009819 | 0.000167 | 0.021847 | 2.615332 | up | noncoding | CR594811        |               | chr17 | + |
| ASHG19A3A009878 | 0.006757 | 0.084149 | 2.678366 | up | noncoding | ENST00000412707 | AC118653.1    | chr17 | + |
| ASHG19A3A010149 | 0.004146 | 0.068504 | 2.390057 | up | noncoding | ENST00000399792 | AP000902.2    | chr18 | - |



|                 |          |          |          |    |           |                 |                |       |   |
|-----------------|----------|----------|----------|----|-----------|-----------------|----------------|-------|---|
| ASHG19A3A010592 | 0.000133 | 0.021847 | 2.062217 | up | noncoding | CR597075        |                | chr18 | + |
| ASHG19A3A010592 | 0.000133 | 0.021847 | 2.062217 | up | noncoding | CR597075        |                | chr18 | + |
| ASHG19A3A010592 | 0.000133 | 0.021847 | 2.062217 | up | noncoding | CR597075        |                | chr18 | + |
| ASHG19A3A010596 | 1.08E-05 | 0.012425 | 2.42567  | up | noncoding | NR_024565       | ZNF271         | chr18 | + |
| ASHG19A3A010596 | 1.08E-05 | 0.012425 | 2.42567  | up | noncoding | NR_024565       | ZNF271         | chr18 | + |
| ASHG19A3A010628 | 0.015752 | 0.123899 | 2.471543 | up | noncoding | G36872          |                | chr18 | + |
| ASHG19A3A010732 | 0.034628 | 0.177079 | 2.345659 | up | noncoding | ENST00000430751 | RP3-434O14.8   | chr1  | - |
| ASHG19A3A010732 | 0.034628 | 0.177079 | 2.345659 | up | noncoding | ENST00000430751 | RP3-434O14.8   | chr1  | - |
| ASHG19A3A010930 | 0.000244 | 0.023452 | 2.157291 | up | noncoding | uc002mej.1      | AK056073       | chr19 | - |
| ASHG19A3A010983 | 0.00294  | 0.058797 | 2.061182 | up | noncoding | uc002mjt.3      | BC014506       | chr19 | - |
| ASHG19A3A012829 | 0.045883 | 0.202504 | 3.408291 | up | noncoding | ENST00000503632 | AC011551.1     | chr19 | + |
| ASHG19A3A013000 | 0.007009 | 0.085867 | 2.197471 | up | noncoding | AK055160        |                | chr19 | + |
| ASHG19A3A013222 | 0.000215 | 0.022938 | 2.295244 | up | noncoding | uc002qyd.1      | BC113076       | chr2  | - |
| ASHG19A3A013222 | 0.000215 | 0.022938 | 2.295244 | up | noncoding | uc002qyd.1      | BC113076       | chr2  | - |
| ASHG19A3A013223 | 2.02E-06 | 0.012395 | 2.335202 | up | noncoding | ENST00000335179 | AC010907.3     | chr2  | - |
| ASHG19A3A013223 | 2.02E-06 | 0.012395 | 2.335202 | up | noncoding | ENST00000335179 | AC010907.3     | chr2  | - |
| ASHG19A3A013317 | 0.024797 | 0.152261 | 4.174778 | up | noncoding | ENST00000444710 | AC008069.2     | chr2  | - |
| ASHG19A3A013343 | 0.044866 | 0.199717 | 4.606711 | up | noncoding | ENST00000438989 | AC007041.2     | chr2  | - |
| ASHG19A3A013406 | 0.034671 | 0.177238 | 5.115662 | up | noncoding | ENST00000274516 | AC011740.3     | chr2  | - |
| ASHG19A3A013996 | 0.024298 | 0.150424 | 5.038191 | up | noncoding | ENST00000415481 | RP11-206L10.13 | chr1  | + |
| ASHG19A3A014172 | 0.007375 | 0.087696 | 2.795083 | up | noncoding | ENST00000443543 | AC010095.6     | chr2  | - |
| ASHG19A3A014344 | 0.018995 | 0.135724 | 3.530564 | up | noncoding | ENST00000449160 | AC132479.4     | chr2  | - |
| ASHG19A3A014359 | 0.00865  | 0.094754 | 2.241754 | up | noncoding | ENST00000425793 | NEK2P4         | chr2  | - |
| ASHG19A3A014464 | 0.004506 | 0.071744 | 2.452381 | up | noncoding | ENST00000445497 | AC105402.1     | chr2  | - |
| ASHG19A3A014732 | 0.000291 | 0.026229 | 5.501525 | up | noncoding | ENST00000450021 | KRT8P10        | chr2  | - |
| ASHG19A3A014815 | 0.000356 | 0.027381 | 2.482721 | up | noncoding | AK096309        |                | chr2  | - |
| ASHG19A3A014880 | 0.003137 | 0.060549 | 2.095315 | up | noncoding | ENST00000405197 | AC064836.3     | chr2  | - |
| ASHG19A3A014980 | 0.026781 | 0.157939 | 2.066323 | up | noncoding | ENST00000425162 | AC073321.2     | chr2  | - |
| ASHG19A3A014997 | 0.031023 | 0.168145 | 2.411215 | up | noncoding | AF116702        |                | chr2  | - |
| ASHG19A3A014997 | 0.031023 | 0.168145 | 2.411215 | up | noncoding | AF116702        |                | chr2  | - |
| ASHG19A3A015058 | 0.020776 | 0.140518 | 3.489507 | up | noncoding | ENST00000430194 | AC079120.1     | chr2  | - |
| ASHG19A3A015399 | 0.033792 | 0.175128 | 6.845215 | up | noncoding | ENST00000437531 | RP11-219F1.2   | chr2  | + |
| ASHG19A3A015399 | 0.033792 | 0.175128 | 6.845215 | up | noncoding | ENST00000437531 | RP11-219F1.2   | chr2  | + |

|                 |          |          |          |    |           |                 |               |       |   |
|-----------------|----------|----------|----------|----|-----------|-----------------|---------------|-------|---|
| ASHG19A3A015399 | 0.033792 | 0.175128 | 6.845215 | up | noncoding | ENST00000437531 | RP11-219F1.2  | chr2  | + |
| ASHG19A3A015558 | 0.001248 | 0.043667 | 2.256709 | up | noncoding | G43245          |               | chr2  | + |
| ASHG19A3A015661 | 0.003886 | 0.06684  | 2.439393 | up | noncoding | NR_002229       | RPL23AP32     | chr2  | + |
| ASHG19A3A015815 | 0.040444 | 0.189467 | 2.288252 | up | noncoding | ENST00000438808 | RP5-934G17.6  | chr1  | + |
| ASHG19A3A015882 | 0.002844 | 0.057716 | 2.875478 | up | noncoding | ENST00000417406 | AC109638.1    | chr2  | + |
| ASHG19A3A016331 | 0.049865 | 0.211919 | 2.711655 | up | noncoding | ENST00000416089 | AC018865.7    | chr2  | + |
| ASHG19A3A016370 | 0.035413 | 0.178599 | 5.428622 | up | noncoding | ENST00000449922 | RHOQP2        | chr2  | + |
| ASHG19A3A016645 | 0.000126 | 0.021847 | 3.169645 | up | noncoding | ENST00000392131 | AC079305.6    | chr2  | + |
| ASHG19A3A016946 | 0.006201 | 0.080771 | 3.618566 | up | noncoding | AK125369        |               | chr2  | + |
| ASHG19A3A017050 | 0.000933 | 0.039493 | 2.249507 | up | noncoding | G36718          |               | chr2  | + |
| ASHG19A3A017463 | 0.038879 | 0.186198 | 5.299093 | up | noncoding | ENST00000396692 | CYB5P4        | chr20 | - |
| ASHG19A3A017645 | 0.013246 | 0.11573  | 2.615317 | up | noncoding | ENST00000423261 | GLRXP         | chr20 | - |
| ASHG19A3A017793 | 5.41E-05 | 0.019365 | 2.418281 | up | noncoding | ENST00000415187 | TMSL6         | chr20 | - |
| ASHG19A3A017793 | 5.41E-05 | 0.019365 | 2.418281 | up | noncoding | ENST00000415187 | TMSL6         | chr20 | - |
| ASHG19A3A017793 | 5.41E-05 | 0.019365 | 2.418281 | up | noncoding | ENST00000415187 | TMSL6         | chr20 | - |
| ASHG19A3A017894 | 0.000677 | 0.036432 | 5.923132 | up | noncoding | ENST00000431361 | RP5-885L7.11  | chr20 | - |
| ASHG19A3A018873 | 0.00466  | 0.071865 | 3.053674 | up | noncoding | ENST00000423089 | AP001434.1    | chr21 | - |
| ASHG19A3A018957 | 0.035561 | 0.179044 | 11.75438 | up | noncoding | ENST00000449877 | MYL6P         | chr21 | - |
| ASHG19A3A019090 | 0.039047 | 0.186591 | 5.023523 | up | noncoding | ENST00000414214 | FDPSP         | chr21 | + |
| ASHG19A3A019214 | 0.046857 | 0.204692 | 2.308407 | up | noncoding | ENST00000399188 | RPS9P1        | chr21 | + |
| ASHG19A3A019321 | 0.020456 | 0.139397 | 2.863579 | up | noncoding | ENST00000398116 | RPL31P1       | chr21 | + |
| ASHG19A3A019413 | 0.036232 | 0.180501 | 2.299679 | up | noncoding | ENST00000429435 | LA16c-58F10.2 | chr22 | - |
| ASHG19A3A020013 | 0.033524 | 0.174703 | 3.145031 | up | noncoding | ENST00000438441 | NEK2P2        | chr22 | + |
| ASHG19A3A020151 | 0.00043  | 0.029577 | 2.693323 | up | noncoding | ENST00000449424 | KB-1323B2.6   | chr22 | + |
| ASHG19A3A020380 | 0.049856 | 0.211919 | 5.726899 | up | noncoding | ENST00000414048 | CTA-714B7.4   | chr22 | + |
| ASHG19A3A020450 | 0.0259   | 0.155471 | 2.027084 | up | noncoding | ENST00000418803 | RP3-508I15.19 | chr22 | + |
| ASHG19A3A020450 | 0.0259   | 0.155471 | 2.027084 | up | noncoding | ENST00000418803 | RP3-508I15.19 | chr22 | + |
| ASHG19A3A020450 | 0.0259   | 0.155471 | 2.027084 | up | noncoding | ENST00000418803 | RP3-508I15.19 | chr22 | + |
| ASHG19A3A020550 | 4.43E-05 | 0.019365 | 3.212838 | up | noncoding | ENST00000435622 | KRT18P23      | chr22 | + |
| ASHG19A3A020662 | 0.04605  | 0.202882 | 4.607315 | up | noncoding | ENST00000497982 | RP1-144F13.4  | chr1  | + |
| ASHG19A3A020748 | 0.032114 | 0.171159 | 4.79897  | up | noncoding | ENST00000430724 | RP11-115D7.3  | chr1  | + |
| ASHG19A3A020789 | 0.024367 | 0.150603 | 2.096424 | up | noncoding | ENST00000417487 | AC104297.2    | chr3  | - |
| ASHG19A3A020867 | 0.04403  | 0.197634 | 2.205079 | up | noncoding | CR622191        |               | chr3  | - |

|                 |          |          |          |    |           |                 |               |      |   |
|-----------------|----------|----------|----------|----|-----------|-----------------|---------------|------|---|
| ASHG19A3A020867 | 0.04403  | 0.197634 | 2.205079 | up | noncoding | CR622191        |               | chr3 | - |
| ASHG19A3A020868 | 0.002132 | 0.053191 | 2.230648 | up | noncoding | G43299          |               | chr3 | - |
| ASHG19A3A020868 | 0.002132 | 0.053191 | 2.230648 | up | noncoding | G43299          |               | chr3 | - |
| ASHG19A3A020870 | 0.000194 | 0.022938 | 6.274893 | up | noncoding | ENST00000413425 | KRT8P18       | chr3 | - |
| ASHG19A3A020891 | 0.009292 | 0.097936 | 4.424297 | up | noncoding | ENST00000440724 | RP11-815I22.1 | chr3 | - |
| ASHG19A3A020920 | 0.036201 | 0.180501 | 2.689414 | up | noncoding | ENST00000433516 | RP11-20O23.1  | chr3 | - |
| ASHG19A3A021090 | 0.010026 | 0.100991 | 3.005395 | up | noncoding | ENST00000421735 | U73167.7      | chr3 | - |
| ASHG19A3A021090 | 0.010026 | 0.100991 | 3.005395 | up | noncoding | ENST00000421735 | U73167.7      | chr3 | - |
| ASHG19A3A021203 | 0.000143 | 0.021847 | 2.513669 | up | noncoding | ENST00000462623 | RP11-154D3.1  | chr3 | - |
| ASHG19A3A021318 | 0.001421 | 0.044381 | 2.014725 | up | noncoding | ENST00000474651 | PROSP         | chr3 | - |
| ASHG19A3A021433 | 0.034931 | 0.177846 | 2.893011 | up | noncoding | ENST00000425915 | AC079944.1    | chr3 | - |
| ASHG19A3A021577 | 4.81E-05 | 0.019365 | 2.063059 | up | noncoding | ENST00000434244 | RP5-1198O20.4 | chr1 | + |
| ASHG19A3A021650 | 0.013362 | 0.1159   | 2.585882 | up | noncoding | G43503          |               | chr3 | - |
| ASHG19A3A021650 | 0.013362 | 0.1159   | 2.585882 | up | noncoding | G43503          |               | chr3 | - |
| ASHG19A3A021650 | 0.013362 | 0.1159   | 2.585882 | up | noncoding | G43503          |               | chr3 | - |
| ASHG19A3A021703 | 0.000711 | 0.036545 | 2.324909 | up | noncoding | BC040051        |               | chr3 | - |
| ASHG19A3A021862 | 0.0351   | 0.178219 | 4.49526  | up | noncoding | ENST00000446155 | RP4-697E16.1  | chr1 | + |
| ASHG19A3A021900 | 0.029997 | 0.165639 | 6.542614 | up | noncoding | ENST00000471495 | RP11-603B13.1 | chr3 | - |
| ASHG19A3A022071 | 0.012626 | 0.113365 | 2.270848 | up | noncoding | HIT000097222    |               | chr3 | - |
| ASHG19A3A022117 | 0.004102 | 0.068173 | 2.739683 | up | noncoding | ENST00000455557 | AC108676.1    | chr3 | - |
| ASHG19A3A022172 | 0.025566 | 0.154644 | 2.573411 | up | noncoding | ENST00000452862 | AC144530.1    | chr3 | - |
| ASHG19A3A022584 | 0.032214 | 0.171214 | 3.540357 | up | noncoding | ENST00000427885 | RP11-395P16.1 | chr3 | + |
| ASHG19A3A022860 | 0.023322 | 0.147746 | 6.864423 | up | noncoding | ENST00000473150 | KRT8P25       | chr3 | + |
| ASHG19A3A022880 | 0.011656 | 0.108779 | 2.268048 | up | noncoding | ENST00000471403 | RP11-346M10.2 | chr3 | + |
| ASHG19A3A022949 | 0.027194 | 0.158616 | 5.513943 | up | noncoding | ENST00000457291 | RP11-238M12.1 | chr3 | + |
| ASHG19A3A022953 | 0.019643 | 0.136965 | 3.257247 | up | noncoding | ENST00000486888 | RP11-281P11.1 | chr3 | + |
| ASHG19A3A023201 | 0.026432 | 0.157033 | 3.234314 | up | noncoding | ENST00000412562 | RP4-794H19.3  | chr1 | + |
| ASHG19A3A023469 | 0.00065  | 0.035914 | 5.001135 | up | noncoding | uc003fdp.1      | BC125159      | chr3 | + |
| ASHG19A3A023526 | 0.000226 | 0.022938 | 7.206053 | up | noncoding | ENST00000463294 | KRT8P13       | chr3 | + |
| ASHG19A3A023787 | 0.011753 | 0.109112 | 3.11462  | up | noncoding | uc011buh.1      | AK128818      | chr3 | + |
| ASHG19A3A023802 | 0.000934 | 0.039493 | 2.617124 | up | noncoding | ENST00000392362 | AC073135.2    | chr3 | + |
| ASHG19A3A023978 | 0.000131 | 0.021847 | 2.317168 | up | noncoding | G36472          |               | chr4 | - |
| ASHG19A3A024044 | 0.022147 | 0.144791 | 2.478344 | up | noncoding | ENST00000511723 | RP11-293A21.2 | chr4 | - |

|                 |          |          |          |    |           |                 |               |      |   |
|-----------------|----------|----------|----------|----|-----------|-----------------|---------------|------|---|
| ASHG19A3A024044 | 0.022147 | 0.144791 | 2.478344 | up | noncoding | ENST00000511723 | RP11-293A21.2 | chr4 | - |
| ASHG19A3A024044 | 0.022147 | 0.144791 | 2.478344 | up | noncoding | ENST00000511723 | RP11-293A21.2 | chr4 | - |
| ASHG19A3A024092 | 0.000722 | 0.036619 | 2.113259 | up | noncoding | uc003gun.1      | CR591173      | chr4 | - |
| ASHG19A3A024106 | 0.026271 | 0.156733 | 2.053182 | up | noncoding | AL080130        |               | chr4 | - |
| ASHG19A3A024106 | 0.026271 | 0.156733 | 2.053182 | up | noncoding | AL080130        |               | chr4 | - |
| ASHG19A3A024106 | 0.026271 | 0.156733 | 2.053182 | up | noncoding | AL080130        |               | chr4 | - |
| ASHG19A3A024106 | 0.026271 | 0.156733 | 2.053182 | up | noncoding | AL080130        |               | chr4 | - |
| ASHG19A3A024106 | 0.026271 | 0.156733 | 2.053182 | up | noncoding | AL080130        |               | chr4 | - |
| ASHG19A3A024106 | 0.026271 | 0.156733 | 2.053182 | up | noncoding | AL080130        |               | chr4 | - |
| ASHG19A3A024469 | 0.015462 | 0.122868 | 3.518973 | up | noncoding | ENST00000508008 | RP11-113G13.2 | chr4 | - |
| ASHG19A3A024573 | 0.000329 | 0.027161 | 2.694778 | up | noncoding | ENST00000502488 | AC004066.2    | chr4 | - |
| ASHG19A3A024933 | 0.014856 | 0.120102 | 3.066556 | up | noncoding | ENST00000495104 | RP11-366M4.2  | chr4 | - |
| ASHG19A3A025395 | 0.001126 | 0.042382 | 3.341378 | up | noncoding | ENST00000507715 | RP11-802H3.1  | chr4 | + |
| ASHG19A3A025440 | 0.029263 | 0.163561 | 3.397437 | up | noncoding | ENST00000508931 | RP11-333E13.3 | chr4 | + |
| ASHG19A3A025935 | 0.000116 | 0.021847 | 2.036375 | up | noncoding | BC127918        |               | chr4 | + |
| ASHG19A3A025941 | 0.036807 | 0.181664 | 2.535135 | up | noncoding | ENST00000515767 | RP11-447B21.1 | chr4 | + |
| ASHG19A3A025977 | 0.025784 | 0.155024 | 4.585734 | up | noncoding | ENST00000412158 | RP11-364P2.1  | chr4 | + |
| ASHG19A3A026019 | 0.000916 | 0.039493 | 2.266985 | up | noncoding | ENST00000501498 | AC108062.1    | chr4 | + |
| ASHG19A3A026103 | 0.013366 | 0.1159   | 2.977801 | up | noncoding | ENST00000504966 | KRT18P51      | chr4 | + |
| ASHG19A3A026365 | 0.025415 | 0.153957 | 2.549896 | up | noncoding | uc003iwb.1      | AK001394      | chr4 | + |
| ASHG19A3A026435 | 0.008627 | 0.094754 | 2.134108 | up | noncoding | AK055000        |               | chr5 | - |
| ASHG19A3A026464 | 0.040323 | 0.189074 | 2.201412 | up | noncoding | uc003jcp.3      | LOC728613     | chr5 | - |
| ASHG19A3A026573 | 0.003406 | 0.063251 | 2.412927 | up | noncoding | ENST00000515372 | RP11-321E2.13 | chr5 | - |
| ASHG19A3A026841 | 8.32E-05 | 0.021847 | 6.10132  | up | noncoding | ENST00000504812 | RP11-109B6.2  | chr5 | - |
| ASHG19A3A026852 | 0.000686 | 0.036491 | 2.466867 | up | noncoding | ENST00000506094 | CTD-2244C20.1 | chr5 | - |
| ASHG19A3A026994 | 0.014604 | 0.119693 | 2.224695 | up | noncoding | ENST00000418362 | RP11-364B6.1  | chr1 | + |
| ASHG19A3A027122 | 0.009838 | 0.100197 | 2.01187  | up | noncoding | ENST00000510254 | RP11-65F13.2  | chr5 | - |
| ASHG19A3A027129 | 0.010654 | 0.104246 | 2.551712 | up | noncoding | AF222858        |               | chr5 | - |
| ASHG19A3A027163 | 8.81E-05 | 0.021847 | 4.782634 | up | noncoding | ENST00000512863 | RP11-474J18.4 | chr5 | - |
| ASHG19A3A027282 | 0.026105 | 0.15602  | 3.618805 | up | noncoding | ENST00000504479 | RP11-950K24.1 | chr5 | - |
| ASHG19A3A027285 | 0.005454 | 0.075982 | 2.657094 | up | noncoding | ENST00000505780 | CTD-2158P22.4 | chr5 | - |
| ASHG19A3A027332 | 0.020288 | 0.139066 | 3.040016 | up | noncoding | ENST00000508631 | RP11-434D11.1 | chr5 | - |

|                 |          |          |          |    |           |                 |               |      |   |
|-----------------|----------|----------|----------|----|-----------|-----------------|---------------|------|---|
| ASHG19A3A027516 | 0.01633  | 0.126164 | 2.280027 | up | noncoding | G42992          |               | chr5 | - |
| ASHG19A3A027516 | 0.01633  | 0.126164 | 2.280027 | up | noncoding | G42992          |               | chr5 | - |
| ASHG19A3A027516 | 0.01633  | 0.126164 | 2.280027 | up | noncoding | G42992          |               | chr5 | - |
| ASHG19A3A027516 | 0.01633  | 0.126164 | 2.280027 | up | noncoding | G42992          |               | chr5 | - |
| ASHG19A3A027516 | 0.01633  | 0.126164 | 2.280027 | up | noncoding | G42992          |               | chr5 | - |
| ASHG19A3A027516 | 0.01633  | 0.126164 | 2.280027 | up | noncoding | G42992          |               | chr5 | - |
| ASHG19A3A027661 | 0.026311 | 0.15675  | 5.180238 | up | noncoding | ENST00000309178 | GLRXP3        | chr5 | - |
| ASHG19A3A028102 | 0.01974  | 0.13732  | 2.249683 | up | noncoding | ENST00000510160 | CTD-2046J7.1  | chr5 | + |
| ASHG19A3A028102 | 0.01974  | 0.13732  | 2.249683 | up | noncoding | ENST00000510160 | CTD-2046J7.1  | chr5 | + |
| ASHG19A3A028102 | 0.01974  | 0.13732  | 2.249683 | up | noncoding | ENST00000510160 | CTD-2046J7.1  | chr5 | + |
| ASHG19A3A028102 | 0.01974  | 0.13732  | 2.249683 | up | noncoding | ENST00000510160 | CTD-2046J7.1  | chr5 | + |
| ASHG19A3A028102 | 0.01974  | 0.13732  | 2.249683 | up | noncoding | ENST00000510160 | CTD-2046J7.1  | chr5 | + |
| ASHG19A3A028102 | 0.01974  | 0.13732  | 2.249683 | up | noncoding | ENST00000510160 | CTD-2046J7.1  | chr5 | + |
| ASHG19A3A028253 | 0.0265   | 0.157191 | 2.249041 | up | noncoding | ENST00000504014 | CTD-2037L6.1  | chr5 | + |
| ASHG19A3A028260 | 0.041663 | 0.192595 | 3.94521  | up | noncoding | ENST00000509515 | CTD-2085F10.1 | chr5 | + |
| ASHG19A3A028260 | 0.041663 | 0.192595 | 3.94521  | up | noncoding | ENST00000509515 | CTD-2085F10.1 | chr5 | + |
| ASHG19A3A028260 | 0.041663 | 0.192595 | 3.94521  | up | noncoding | ENST00000509515 | CTD-2085F10.1 | chr5 | + |
| ASHG19A3A028260 | 0.041663 | 0.192595 | 3.94521  | up | noncoding | ENST00000509515 | CTD-2085F10.1 | chr5 | + |
| ASHG19A3A028414 | 0.047774 | 0.206719 | 2.39923  | up | noncoding | G43036          |               | chr5 | + |
| ASHG19A3A028425 | 0.011374 | 0.107768 | 3.571644 | up | noncoding | ENST00000510759 | CTC-422A18.2  | chr5 | + |
| ASHG19A3A028596 | 0.005901 | 0.079292 | 2.104443 | up | noncoding | HIT000070642    |               | chr5 | + |
| ASHG19A3A028602 | 0.016865 | 0.127494 | 5.002802 | up | noncoding | ENST00000505048 | KRT18P42      | chr5 | + |
| ASHG19A3A028891 | 0.017099 | 0.128536 | 3.178492 | up | noncoding | ENST00000505275 | RP11-515C16.2 | chr5 | + |
| ASHG19A3A029003 | 0.040531 | 0.189807 | 2.977963 | up | noncoding | ENST00000509352 | CTC-327F10.3  | chr5 | + |
| ASHG19A3A029381 | 0.005026 | 0.07357  | 2.283714 | up | noncoding | AF143325        |               | chr6 | - |
| ASHG19A3A029381 | 0.005026 | 0.07357  | 2.283714 | up | noncoding | AF143325        |               | chr6 | - |
| ASHG19A3A029491 | 0.000302 | 0.026395 | 2.294555 | up | noncoding | AL110159        |               | chr6 | - |
| ASHG19A3A029491 | 0.000302 | 0.026395 | 2.294555 | up | noncoding | AL110159        |               | chr6 | - |
| ASHG19A3A029601 | 0.008111 | 0.091933 | 2.72051  | up | noncoding | ENST00000452408 | KRT18P1       | chr6 | - |
| ASHG19A3A030063 | 0.027013 | 0.158169 | 3.945852 | up | noncoding | ENST00000374318 | RP11-337C18.4 | chr1 | + |
| ASHG19A3A030243 | 0.033908 | 0.175245 | 2.071536 | up | noncoding | ENST00000406493 | RP3-382I10.3  | chr6 | - |
| ASHG19A3A030300 | 0.006171 | 0.080669 | 3.300088 | up | noncoding | ENST00000403144 | RP11-111D3.1  | chr6 | - |
| ASHG19A3A030379 | 0.030688 | 0.167477 | 2.468895 | up | noncoding | ENST00000405355 | RP11-346C16.4 | chr6 | - |

|                 |          |          |          |    |           |                 |               |      |   |
|-----------------|----------|----------|----------|----|-----------|-----------------|---------------|------|---|
| ASHG19A3A030403 | 0.041415 | 0.192158 | 5.849321 | up | noncoding | ENST00000439811 | RP11-506B6.2  | chr6 | - |
| ASHG19A3A030468 | 0.03972  | 0.187773 | 2.55432  | up | noncoding | ENST00000406327 | RP3-438G17.1  | chr6 | - |
| ASHG19A3A030498 | 0.002586 | 0.056252 | 2.05949  | up | noncoding | ENST00000407841 | RP11-325O24.2 | chr6 | - |
| ASHG19A3A031041 | 0.014341 | 0.119326 | 3.031232 | up | noncoding | ENST00000449496 | KRT18P38      | chr6 | + |
| ASHG19A3A031105 | 0.001539 | 0.045337 | 2.245546 | up | noncoding | BC042589        |               | chr6 | + |
| ASHG19A3A031184 | 3.17E-05 | 0.017887 | 2.008886 | up | noncoding | uc010jrd.2      | CR619760      | chr6 | + |
| ASHG19A3A031220 | 0.016923 | 0.1277   | 3.075348 | up | noncoding | ENST00000429813 | HLA-16        | chr6 | + |
| ASHG19A3A031242 | 0.008868 | 0.095474 | 2.03869  | up | noncoding | ENST00000437516 | HLA-N         | chr6 | + |
| ASHG19A3A031389 | 0.01555  | 0.123148 | 2.819092 | up | noncoding | ENST00000429998 | RP11-513I15.6 | chr6 | + |
| ASHG19A3A031395 | 0.029796 | 0.164881 | 3.302817 | up | noncoding | ENST00000334441 | RP11-140K17.2 | chr6 | + |
| ASHG19A3A031420 | 0.020324 | 0.139066 | 5.554195 | up | noncoding | ENST00000403727 | RP3-510O8.3   | chr6 | + |
| ASHG19A3A032209 | 0.042851 | 0.19498  | 2.085511 | up | noncoding | ENST00000392260 | RP11-472G23.7 | chr6 | + |
| ASHG19A3A032250 | 0.044117 | 0.197673 | 2.707177 | up | noncoding | ENST00000404107 | RP11-486M3.2  | chr6 | + |
| ASHG19A3A032389 | 5.88E-05 | 0.019365 | 2.059804 | up | noncoding | AK124993        |               | chr7 | - |
| ASHG19A3A032552 | 0.04121  | 0.191773 | 2.557238 | up | noncoding | ENST00000416636 | CLK2P         | chr7 | - |
| ASHG19A3A032712 | 0.032061 | 0.171159 | 2.716562 | up | noncoding | ENST00000438427 | AC011290.5    | chr7 | - |
| ASHG19A3A032829 | 0.030036 | 0.165701 | 4.453899 | up | noncoding | ENST00000448566 | RP11-310H4.5  | chr7 | - |
| ASHG19A3A032876 | 0.000153 | 0.021847 | 5.975135 | up | noncoding | ENST00000414328 | RP11-110J1.3  | chr1 | + |
| ASHG19A3A033132 | 0.036508 | 0.181022 | 3.489198 | up | noncoding | ENST00000419546 | AC002069.5    | chr7 | - |
| ASHG19A3A033231 | 0.003091 | 0.060296 | 2.053433 | up | noncoding | ENST00000500980 | AC005020.1    | chr7 | - |
| ASHG19A3A033231 | 0.003091 | 0.060296 | 2.053433 | up | noncoding | ENST00000500980 | AC005020.1    | chr7 | - |
| ASHG19A3A033231 | 0.003091 | 0.060296 | 2.053433 | up | noncoding | ENST00000500980 | AC005020.1    | chr7 | - |
| ASHG19A3A033231 | 0.003091 | 0.060296 | 2.053433 | up | noncoding | ENST00000500980 | AC005020.1    | chr7 | - |
| ASHG19A3A033406 | 0.012289 | 0.111948 | 2.240048 | up | noncoding | uc003vhn.1      | BC040208      | chr7 | - |
| ASHG19A3A033768 | 0.000225 | 0.022938 | 2.271348 | up | noncoding | BC015321        |               | chr7 | - |
| ASHG19A3A033784 | 0.01481  | 0.120056 | 2.683296 | up | noncoding | ENST00000427666 | AC104843.4    | chr7 | - |
| ASHG19A3A034215 | 0.036353 | 0.180828 | 7.392929 | up | noncoding | ENST00000437554 | AC018634.9    | chr7 | + |
| ASHG19A3A034224 | 0.004079 | 0.068139 | 7.303258 | up | noncoding | ENST00000423953 | KRT8P20       | chr7 | + |
| ASHG19A3A034337 | 0.041179 | 0.191771 | 3.014895 | up | noncoding | ENST00000431058 | GS1-18A18.3   | chr7 | + |
| ASHG19A3A034424 | 0.044327 | 0.198195 | 4.886113 | up | noncoding | ENST00000418558 | RP11-340I6.4  | chr7 | + |
| ASHG19A3A034443 | 0.017301 | 0.128941 | 4.085518 | up | noncoding | ENST00000456056 | RP11-321E8.2  | chr7 | + |
| ASHG19A3A034495 | 0.000648 | 0.035914 | 2.223484 | up | noncoding | uc003tvu.2      | BC017910      | chr7 | + |
| ASHG19A3A034619 | 0.026853 | 0.157939 | 4.351187 | up | noncoding | ENST00000442074 | AC007237.2    | chr7 | + |

|                 |          |          |          |    |           |                 |               |      |   |
|-----------------|----------|----------|----------|----|-----------|-----------------|---------------|------|---|
| ASHG19A3A035186 | 0.001536 | 0.045337 | 5.447666 | up | noncoding | ENST00000477911 | MYL6P4        | chr7 | + |
| ASHG19A3A035518 | 0.049577 | 0.211112 | 2.584116 | up | noncoding | AF124367        |               | chr8 | - |
| ASHG19A3A036727 | 0.034397 | 0.176397 | 2.723936 | up | noncoding | ENST00000329349 | AC091175.1    | chr8 | + |
| ASHG19A3A036842 | 0.020991 | 0.141058 | 3.238829 | up | noncoding | ENST00000395830 | RP11-778D12.1 | chr8 | + |
| ASHG19A3A036886 | 0.024554 | 0.151262 | 3.025609 | up | noncoding | ENST00000442838 | AC016405.1    | chr8 | + |
| ASHG19A3A037069 | 0.048288 | 0.208224 | 3.790333 | up | noncoding | ENST00000433885 | RP11-255J3.3  | chr9 | - |
| ASHG19A3A037229 | 0.019167 | 0.135982 | 2.050615 | up | noncoding | ENST00000438438 | RP11-255N24.1 | chr9 | - |
| ASHG19A3A037303 | 0.042762 | 0.19498  | 2.298744 | up | noncoding | ENST00000358828 | RP11-182N22.7 | chr9 | - |
| ASHG19A3A037361 | 0.043076 | 0.195349 | 2.673444 | up | noncoding | ENST00000443069 | RP11-403F21.1 | chr9 | - |
| ASHG19A3A037545 | 0.004515 | 0.071744 | 2.292962 | up | noncoding | AB209630        |               | chr9 | - |
| ASHG19A3A037545 | 0.004515 | 0.071744 | 2.292962 | up | noncoding | AB209630        |               | chr9 | - |
| ASHG19A3A037545 | 0.004515 | 0.071744 | 2.292962 | up | noncoding | AB209630        |               | chr9 | - |
| ASHG19A3A037545 | 0.004515 | 0.071744 | 2.292962 | up | noncoding | AB209630        |               | chr9 | - |
| ASHG19A3A037545 | 0.004515 | 0.071744 | 2.292962 | up | noncoding | AB209630        |               | chr9 | - |
| ASHG19A3A037545 | 0.004515 | 0.071744 | 2.292962 | up | noncoding | AB209630        |               | chr9 | - |
| ASHG19A3A037565 | 0.034917 | 0.177846 | 2.41572  | up | noncoding | uc011lsc.1      | HSPBL2        | chr9 | - |
| ASHG19A3A037571 | 0.006937 | 0.085404 | 2.740582 | up | noncoding | ENST00000457473 | RP11-28P17.2  | chr9 | - |
| ASHG19A3A037606 | 0.047119 | 0.205361 | 3.049023 | up | noncoding | ENST00000344739 | RP11-507F17.1 | chr9 | - |
| ASHG19A3A037824 | 0.045557 | 0.201598 | 6.183415 | up | noncoding | ENST00000418219 | RP11-490D19.8 | chr9 | - |
| ASHG19A3A037907 | 0.000101 | 0.021847 | 2.490594 | up | noncoding | uc010muh.1      | AK095652      | chr9 | - |
| ASHG19A3A038311 | 0.00286  | 0.057744 | 2.205756 | up | noncoding | ENST00000427722 | RP11-509J21.3 | chr9 | + |
| ASHG19A3A038340 | 0.029457 | 0.163926 | 2.671654 | up | noncoding | ENST00000445989 | RP11-279E1.1  | chr9 | + |
| ASHG19A3A038460 | 0.020574 | 0.139691 | 3.501882 | up | noncoding | ENST00000452970 | RP11-441F11.1 | chr9 | + |
| ASHG19A3A038500 | 0.006099 | 0.080205 | 2.253213 | up | noncoding | ENST00000419794 | RP11-571F15.6 | chr9 | + |
| ASHG19A3A038536 | 0.0027   | 0.057202 | 2.655141 | up | noncoding | BC014254        |               | chr9 | + |
| ASHG19A3A038732 | 0.043259 | 0.195625 | 2.09557  | up | noncoding | ENST00000455242 | RP11-460N11.2 | chr9 | + |
| ASHG19A3A038879 | 0.007891 | 0.090952 | 4.113872 | up | noncoding | ENST00000454946 | RP11-497K15.1 | chr9 | + |
| ASHG19A3A038897 | 0.032933 | 0.173032 | 2.44928  | up | noncoding | ENST00000375867 | RP11-1E11.1   | chr9 | + |
| ASHG19A3A038927 | 0.000179 | 0.021968 | 2.093202 | up | noncoding | AF116613        |               | chr9 | + |
| ASHG19A3A039038 | 0.026309 | 0.15675  | 3.411801 | up | noncoding | ENST00000418987 | RP11-394D2.1  | chr9 | + |
| ASHG19A3A039095 | 0.046462 | 0.203893 | 3.776081 | up | noncoding | ENST00000394889 | RP11-3J11.1   | chr9 | + |
| ASHG19A3A039112 | 0.026511 | 0.157191 | 2.033408 | up | noncoding | AK098037        |               | chr9 | + |
| ASHG19A3A039112 | 0.026511 | 0.157191 | 2.033408 | up | noncoding | AK098037        |               | chr9 | + |

|                 |          |          |          |    |           |                 |               |      |   |
|-----------------|----------|----------|----------|----|-----------|-----------------|---------------|------|---|
| ASHG19A3A039209 | 0.007236 | 0.086947 | 4.747197 | up | noncoding | ENST00000432816 | RP11-163B6.2  | chr9 | + |
| ASHG19A3A039303 | 0.015603 | 0.123323 | 2.063152 | up | noncoding | ENST00000429208 | RP11-385M4.3  | chr1 | + |
| ASHG19A3A039373 | 0.000137 | 0.021847 | 2.013914 | up | noncoding | ENST00000426171 | RP11-415H23.4 | chr9 | + |
| ASHG19A3A039601 | 0.000168 | 0.021847 | 2.156653 | up | noncoding | ENST00000412485 | GS1-600G8.5   | chrX | - |
| ASHG19A3A039706 | 0.00131  | 0.043868 | 2.032888 | up | noncoding | ENST00000416765 | RP1-22N22.1   | chrX | - |
| ASHG19A3A039788 | 1.95E-05 | 0.016206 | 3.825712 | up | noncoding | ENST00000398010 | KRT8P14       | chrX | - |
| ASHG19A3A039796 | 0.030656 | 0.167477 | 3.573438 | up | noncoding | ENST00000417985 | RP1-30G7.1    | chrX | - |
| ASHG19A3A039798 | 0.011951 | 0.109984 | 2.414788 | up | noncoding | uc004dgl.1      | BC015977      | chrX | - |
| ASHG19A3A039800 | 0.007214 | 0.086891 | 4.198456 | up | noncoding | ENST00000425487 | RP11-75A9.2   | chrX | - |
| ASHG19A3A039825 | 0.013604 | 0.116817 | 9.055902 | up | noncoding | ENST00000433189 | RP11-344N17.2 | chrX | - |
| ASHG19A3A039874 | 0.025226 | 0.153726 | 2.172236 | up | noncoding | NR_026742       | LOC158572     | chrX | - |
| ASHG19A3A040520 | 0.01405  | 0.11848  | 2.459464 | up | noncoding | G36544          |               | chrX | - |
| ASHG19A3A040555 | 0.007401 | 0.087873 | 2.195727 | up | noncoding | ENST00000434763 | RP11-66N11.5  | chrX | - |
| ASHG19A3A040667 | 0.009226 | 0.097712 | 3.221881 | up | noncoding | ENST00000434191 | RP11-430A19.2 | chrX | + |
| ASHG19A3A040702 | 0.003678 | 0.065718 | 2.364419 | up | noncoding | G43559          |               | chrX | + |
| ASHG19A3A040702 | 0.003678 | 0.065718 | 2.364419 | up | noncoding | G43559          |               | chrX | + |
| ASHG19A3A040729 | 0.036629 | 0.181044 | 4.992445 | up | noncoding | ENST00000439908 | RP3-499B10.5  | chrX | + |
| ASHG19A3A040757 | 0.002363 | 0.054571 | 2.694194 | up | noncoding | NR_027783       | SAT1          | chrX | + |
| ASHG19A3A040838 | 0.000225 | 0.022938 | 2.172772 | up | noncoding | ENST00000447051 | RP4-669K10.3  | chr1 | - |
| ASHG19A3A040838 | 0.000225 | 0.022938 | 2.172772 | up | noncoding | ENST00000447051 | RP4-669K10.3  | chr1 | - |
| ASHG19A3A040838 | 0.000225 | 0.022938 | 2.172772 | up | noncoding | ENST00000447051 | RP4-669K10.3  | chr1 | - |
| ASHG19A3A040838 | 0.000225 | 0.022938 | 2.172772 | up | noncoding | ENST00000447051 | RP4-669K10.3  | chr1 | - |
| ASHG19A3A040860 | 0.001338 | 0.043868 | 4.920728 | up | noncoding | ENST00000456333 | RP11-169L17.2 | chrX | + |
| ASHG19A3A041043 | 0.013231 | 0.115698 | 2.619691 | up | noncoding | ENST00000362552 | Z97054.1      | chrX | + |
| ASHG19A3A041109 | 0.031155 | 0.168272 | 2.685121 | up | noncoding | ENST00000412159 | RP11-133K18.1 | chrX | + |
| ASHG19A3A041195 | 0.020409 | 0.139376 | 6.167691 | up | noncoding | ENST00000425964 | USMG5P1       | chrX | + |
| ASHG19A3A041441 | 0.039698 | 0.187745 | 2.713338 | up | noncoding | ENST00000438228 | RP3-378P9.1   | chrX | + |
| ASHG19A3A041629 | 0.022482 | 0.146112 | 2.213188 | up | noncoding | ENST00000425910 | GS1-164F24.1  | chrX | + |
| ASHG19A3A041704 | 0.000465 | 0.030536 | 4.825973 | up | noncoding | ENST00000434750 | AC108171.5    | chrX | + |
| ASHG19A3A041823 | 0.000214 | 0.022938 | 2.201619 | up | noncoding | ENST00000434155 | AC012068.2    | chrY | - |
| ASHG19A3A042272 | 0.012239 | 0.111174 | 2.158465 | up | noncoding | NR_026588       | EFCAB2        | chr1 | + |
| ASHG19A3A042272 | 0.012239 | 0.111174 | 2.158465 | up | noncoding | NR_026588       | EFCAB2        | chr1 | + |
| ASHG19A3A042340 | 5.58E-05 | 0.019365 | 2.032376 | up | noncoding | ENST00000396714 | SEPW1P        | chr1 | - |



|                 |          |          |          |    |           |                 |               |       |   |
|-----------------|----------|----------|----------|----|-----------|-----------------|---------------|-------|---|
| ASHG19A3A042424 | 1.89E-05 | 0.016206 | 5.757999 | up | noncoding | ENST00000451609 | RP11-543F8.1  | chr10 | - |
| ASHG19A3A042495 | 0.029019 | 0.16302  | 3.093023 | up | noncoding | G43223          |               | chr10 | - |
| ASHG19A3A042519 | 0.013756 | 0.117587 | 2.061119 | up | noncoding | BC041955        |               | chr10 | - |
| ASHG19A3A042580 | 0.001839 | 0.049656 | 2.146334 | up | noncoding | ENST00000438347 | RP11-449I17.5 | chr10 | - |
| ASHG19A3A042708 | 0.014597 | 0.119693 | 3.625568 | up | noncoding | ENST00000424552 | RP11-671E7.1  | chr10 | - |
| ASHG19A3A042993 | 0.010168 | 0.101468 | 2.186152 | up | noncoding | ENST00000416656 | SPA17P1       | chr10 | - |
| ASHG19A3A043163 | 0.017551 | 0.129596 | 6.969642 | up | noncoding | ENST00000412164 | RP11-153G4.2  | chr10 | - |
| ASHG19A3A043163 | 0.017551 | 0.129596 | 6.969642 | up | noncoding | ENST00000412164 | RP11-153G4.2  | chr10 | - |
| ASHG19A3A043163 | 0.017551 | 0.129596 | 6.969642 | up | noncoding | ENST00000412164 | RP11-153G4.2  | chr10 | - |
| ASHG19A3A043175 | 0.046446 | 0.203893 | 2.093756 | up | noncoding | ENST00000417456 | RP11-244H3.1  | chr1  | - |
| ASHG19A3A043254 | 0.028578 | 0.162372 | 2.446327 | up | noncoding | ENST00000438729 | RP11-753C18.8 | chr10 | - |
| ASHG19A3A043330 | 0.005158 | 0.074419 | 2.196631 | up | noncoding | ENST00000449709 | RP11-295O23.4 | chr10 | - |
| ASHG19A3A043670 | 0.046278 | 0.203588 | 3.159642 | up | noncoding | ENST00000413342 | RP11-139J15.4 | chr10 | + |
| ASHG19A3A043806 | 0.013094 | 0.115205 | 8.61482  | up | noncoding | ENST00000431356 | RP13-331H15.1 | chr10 | + |
| ASHG19A3A043901 | 0.043537 | 0.196304 | 2.352069 | up | noncoding | ENST00000406997 | RP11-420K8.2  | chr1  | - |
| ASHG19A3A043904 | 0.022107 | 0.144738 | 2.171889 | up | noncoding | ENST00000457349 | CTD-2173J9.4  | chr10 | + |
| ASHG19A3A043933 | 0.018393 | 0.133075 | 4.3543   | up | noncoding | ENST00000420752 | RP11-507K13.4 | chr10 | + |
| ASHG19A3A044017 | 0.030401 | 0.166698 | 2.980075 | up | noncoding | ENST00000404883 | ANXA2P3       | chr10 | + |
| ASHG19A3A044203 | 0.018956 | 0.135697 | 3.134835 | up | noncoding | ENST00000391458 | HMG2L8        | chr10 | + |
| ASHG19A3A044362 | 6.24E-05 | 0.019365 | 2.390877 | up | noncoding | ENST00000424567 | RP11-163G10.3 | chr1  | - |
| ASHG19A3A044415 | 0.014589 | 0.119693 | 2.782919 | up | noncoding | ENST00000448759 | RP11-342M1.7  | chr1  | - |
| ASHG19A3A044463 | 0.0011   | 0.041819 | 2.069295 | up | noncoding | ENST00000393174 | RP11-45P22.1  | chr10 | + |
| ASHG19A3A044944 | 0.006034 | 0.079912 | 2.134895 | up | noncoding | AB073355        |               | chr11 | - |
| ASHG19A3A044970 | 0.001022 | 0.040796 | 2.01983  | up | noncoding | BC032761        |               | chr11 | - |
| ASHG19A3A045297 | 0.000638 | 0.035731 | 2.314795 | up | noncoding | ENST00000371865 | RP11-543D5.3  | chr1  | - |
| ASHG19A3A045432 | 0.000119 | 0.021847 | 2.385538 | up | noncoding | ENST00000440986 | CFLP2         | chr1  | - |
| ASHG19A3A045441 | 0.022956 | 0.146898 | 2.799275 | up | noncoding | AK130416        |               | chr11 | - |
| ASHG19A3A045606 | 0.004077 | 0.068139 | 3.226755 | up | noncoding | uc001pfj.2      | CR603982      | chr11 | - |
| ASHG19A3A045680 | 0.000482 | 0.031329 | 2.891494 | up | noncoding | ENST00000425960 | AP000925.2    | chr11 | - |
| ASHG19A3A045784 | 0.000114 | 0.021847 | 4.501198 | up | noncoding | ENST00000440275 | KRT8P7        | chr11 | - |
| ASHG19A3A045793 | 0.00435  | 0.070474 | 3.622078 | up | noncoding | G36614          |               | chr11 | - |
| ASHG19A3A045793 | 0.00435  | 0.070474 | 3.622078 | up | noncoding | G36614          |               | chr11 | - |
| ASHG19A3A045793 | 0.00435  | 0.070474 | 3.622078 | up | noncoding | G36614          |               | chr11 | - |

|                 |          |          |          |    |           |                 |               |       |   |
|-----------------|----------|----------|----------|----|-----------|-----------------|---------------|-------|---|
| ASHG19A3A045793 | 0.00435  | 0.070474 | 3.622078 | up | noncoding | G36614          |               | chr11 | - |
| ASHG19A3A045793 | 0.00435  | 0.070474 | 3.622078 | up | noncoding | G36614          |               | chr11 | - |
| ASHG19A3A045793 | 0.00435  | 0.070474 | 3.622078 | up | noncoding | G36614          |               | chr11 | - |
| ASHG19A3A045793 | 0.00435  | 0.070474 | 3.622078 | up | noncoding | G36614          |               | chr11 | - |
| ASHG19A3A046319 | 0.000843 | 0.038458 | 2.287747 | up | noncoding | NR_027134       | DKFZp779M0652 | chr11 | + |
| ASHG19A3A046768 | 0.001247 | 0.043667 | 4.57528  | up | noncoding | ENST00000430203 | CFLP3         | chr1  | - |
| ASHG19A3A046768 | 0.001247 | 0.043667 | 4.57528  | up | noncoding | ENST00000430203 | CFLP3         | chr1  | - |
| ASHG19A3A047100 | 0.019213 | 0.136141 | 3.025481 | up | noncoding | HIT000047909    |               | chr11 | + |
| ASHG19A3A047408 | 0.01561  | 0.123323 | 5.284373 | up | noncoding | ENST00000431536 | RP4-706L14.2  | chr1  | - |
| ASHG19A3A047453 | 0.023365 | 0.147746 | 2.140282 | up | noncoding | ENST00000513923 | AL136324.1    | chr1  | - |
| ASHG19A3A047453 | 0.023365 | 0.147746 | 2.140282 | up | noncoding | ENST00000513923 | AL136324.1    | chr1  | - |
| ASHG19A3A047758 | 0.024718 | 0.151839 | 2.972998 | up | noncoding | ENST00000473404 | RP11-415I12.1 | chr12 | - |
| ASHG19A3A047820 | 0.00129  | 0.043722 | 2.651765 | up | noncoding | ENST00000344556 | AC123904.1    | chr12 | - |
| ASHG19A3A048039 | 0.003749 | 0.066321 | 2.312626 | up | noncoding | ENST00000440817 | RP11-413E1.2  | chr1  | - |
| ASHG19A3A048332 | 0.014526 | 0.119693 | 2.216318 | up | noncoding | ENST00000421414 | RP5-837O21.9  | chr1  | - |
| ASHG19A3A048395 | 0.000681 | 0.036491 | 2.297843 | up | noncoding | uc001rbb.3      | TVAS4         | chr12 | + |
| ASHG19A3A048463 | 0.005363 | 0.075336 | 2.012476 | up | noncoding | BC056670        |               | chr12 | + |
| ASHG19A3A049485 | 0.048409 | 0.20831  | 7.536938 | up | noncoding | ENST00000400429 | RP11-74J13.2  | chr13 | - |
| ASHG19A3A049578 | 0.009888 | 0.100274 | 2.29065  | up | noncoding | AF086440        |               | chr13 | - |
| ASHG19A3A049769 | 0.012297 | 0.111948 | 3.970603 | up | noncoding | ENST00000430810 | RP11-295B17.4 | chr13 | - |
| ASHG19A3A050085 | 0.007547 | 0.088894 | 2.346305 | up | noncoding | AF085832        |               | chr13 | + |
| ASHG19A3A050085 | 0.007547 | 0.088894 | 2.346305 | up | noncoding | AF085832        |               | chr13 | + |
| ASHG19A3A050290 | 0.026813 | 0.157939 | 4.891389 | up | noncoding | ENST00000437000 | RP11-505F3.2  | chr13 | + |
| ASHG19A3A050375 | 0.000212 | 0.022938 | 2.912277 | up | noncoding | ENST00000427733 | KRT18P27      | chr13 | + |
| ASHG19A3A050424 | 0.034978 | 0.177846 | 4.175693 | up | noncoding | ENST00000436148 | RP11-214F16.5 | chr13 | + |
| ASHG19A3A050730 | 0.000134 | 0.021847 | 3.52227  | up | noncoding | ENST00000454391 | AL358913.1    | chr14 | - |
| ASHG19A3A050823 | 0.023151 | 0.147646 | 2.537251 | up | noncoding | ENST00000439302 | BX571672.5    | chr1  | - |
| ASHG19A3A050997 | 0.030656 | 0.167477 | 4.842603 | up | noncoding | ENST00000469811 | RP11-488C13.1 | chr14 | - |
| ASHG19A3A051049 | 0.014149 | 0.118581 | 3.788318 | up | noncoding | ENST00000461458 | RP11-439L12.1 | chr14 | - |
| ASHG19A3A051292 | 0.02115  | 0.141622 | 5.854395 | up | noncoding | AK057381        |               | chr14 | + |
| ASHG19A3A051574 | 0.040215 | 0.188981 | 2.284791 | up | noncoding | uc001esd.2      | CR617196      | chr1  | - |
| ASHG19A3A051574 | 0.040215 | 0.188981 | 2.284791 | up | noncoding | uc001esd.2      | CR617196      | chr1  | - |
| ASHG19A3A051731 | 0.02709  | 0.158254 | 5.84883  | up | noncoding | CR603341        |               | chr14 | + |

|                      |          |          |          |    |           |                 |                  |       |   |
|----------------------|----------|----------|----------|----|-----------|-----------------|------------------|-------|---|
| ASHG19A3A052048      | 0.00367  | 0.065705 | 2.333731 | up | noncoding | ENST00000417705 | RP11-54O7.3      | chr1  | - |
| ASHG19A3A052066      | 0.029359 | 0.163646 | 3.712378 | up | noncoding | uc001zqs.1      | CR599671         | chr15 | - |
| ASHG19A3A052579      | 0.044043 | 0.197634 | 2.976561 | up | noncoding | ENST00000505622 | RP11-522B15.2    | chr15 | - |
| ASHG19A3A053143      | 0.001165 | 0.04271  | 2.337481 | up | noncoding | NR_028330       | C15orf37         | chr15 | + |
| ASHG19A3A053143      | 0.001165 | 0.04271  | 2.337481 | up | noncoding | NR_028330       | C15orf37         | chr15 | + |
| ASHG19A3A053143      | 0.001165 | 0.04271  | 2.337481 | up | noncoding | NR_028330       | C15orf37         | chr15 | + |
| ASHG19A3A053801      | 0.00025  | 0.023763 | 2.183214 | up | noncoding | ENST00000501095 | AC009118.2       | chr16 | - |
| ASHG19A3A053801      | 0.00025  | 0.023763 | 2.183214 | up | noncoding | ENST00000501095 | AC009118.2       | chr16 | - |
| ASHG19A3A053801      | 0.00025  | 0.023763 | 2.183214 | up | noncoding | ENST00000501095 | AC009118.2       | chr16 | - |
| ASHG19A3A054241      | 0.000162 | 0.021847 | 2.214978 | up | noncoding | uc002cvu.2      | BC095475         | chr16 | + |
| ASHG19A3A054988      | 0.000387 | 0.028192 | 2.764476 | up | noncoding | NR_028504       | C17orf91         | chr17 | - |
| ASHG19A3A054988      | 0.000387 | 0.028192 | 2.764476 | up | noncoding | NR_028504       | C17orf91         | chr17 | - |
| ASHG19A3A055128      | 0.002436 | 0.05493  | 2.827158 | up | noncoding | uc002dtq.1      | BC041466         | chr16 | + |
| ASHG19A3A055218      | 0.033861 | 0.175169 | 2.955056 | up | noncoding | ENST00000376792 | HLA-J            | chr6  | + |
| ASHG19A3A055285      | 0.026685 | 0.157664 | 2.229054 | up | noncoding | uc010gtf.1      | AK308704         | chr22 | + |
| ASHG19A3H0000080     | 0.02595  | 0.155649 | 3.070578 | up | noncoding | nc-HOXA13-96-   | nc-HOXA13-96     | chr7  | - |
| ASHG19A3L0001164     | 0.002451 | 0.055096 | 2.594421 | up | noncoding | BF185848        | lincRNA-SH3BP4-4 | chr2  | + |
| ASHG19A3L0001218     | 0.020846 | 0.140521 | 4.976152 | up | noncoding | AY034104        | lincRNA-TACR1-2  | chr2  | + |
| ASHG19A3L0001362     | 0.011871 | 0.109558 | 5.944884 | up | noncoding | BX641108        | lincRNA-TPRG1-2  | chr3  | + |
| ASHG19A3L0001362     | 0.011871 | 0.109558 | 5.944884 | up | noncoding | BX641108        | lincRNA-TPRG1-2  | chr3  | + |
| ASHG19A3L0001362     | 0.011871 | 0.109558 | 5.944884 | up | noncoding | BX641108        | lincRNA-TPRG1-2  | chr3  | + |
| ASHG19A3L0001362     | 0.011871 | 0.109558 | 5.944884 | up | noncoding | BX641108        | lincRNA-TPRG1-2  | chr3  | + |
| ASHG19A3L0002752     | 2.19E-06 | 0.012395 | 3.355898 | up | noncoding | EC495588        | lincRNA-RCN2     | chr15 | - |
| CUST_186_PI426073487 | 0.009645 | 0.099362 | 2.198396 | up | noncoding | uc.188+         | uc.188           | chr6  | + |
| CUST_186_PI426073487 | 0.009645 | 0.099362 | 2.198396 | up | noncoding | uc.188+         | uc.188           | chr6  | + |
| CUST_28_PI426075208  | 0.006197 | 0.080771 | 2.213516 | up | noncoding | nc-HOXA4-66+    | nc-HOXA4-66      | chr7  | + |
| CUST_404_PI426073487 | 0.000158 | 0.021847 | 2.547203 | up | noncoding | uc.406+         | uc.406           | chr16 | + |
| CUST_404_PI426073487 | 0.000158 | 0.021847 | 2.547203 | up | noncoding | uc.406+         | uc.406           | chr16 | + |
| CUST_404_PI426073487 | 0.000158 | 0.021847 | 2.547203 | up | noncoding | uc.406+         | uc.406           | chr16 | + |
| CUST_404_PI426073487 | 0.000158 | 0.021847 | 2.547203 | up | noncoding | uc.406+         | uc.406           | chr16 | + |
| CUST_404_PI426073487 | 0.000158 | 0.021847 | 2.547203 | up | noncoding | uc.406+         | uc.406           | chr16 | + |
| CUST_895_PI426073487 | 0.004949 | 0.073128 | 2.624665 | up | noncoding | uc.416-         | uc.416           | chr17 | - |
| CUST_95_PI426075208  | 0.031046 | 0.168165 | 3.198076 | up | noncoding | nc-HOXB9-199+   | nc-HOXB9-199     | chr17 | + |

**Supplementary Table 3-2. The list of lncRNAs downregulated by c-MYC knockdown (upregulated by c-MYC) in RKO.**

| ProbeName       | P-value and FDR |          | Fold change and Regulation |            | type      | seqname         | GeneSymbol    | chrom | strand |
|-----------------|-----------------|----------|----------------------------|------------|-----------|-----------------|---------------|-------|--------|
|                 | p-value         | FDR      | FCAbsolute                 | regulation |           |                 |               |       |        |
| ASHG19A3A000043 | 0.00307         | 0.060294 | 2.162093                   | down       | noncoding | BC063571        |               | chr11 | -      |
| ASHG19A3A000043 | 0.00307         | 0.060294 | 2.162093                   | down       | noncoding | BC063571        |               | chr11 | -      |
| ASHG19A3A000043 | 0.00307         | 0.060294 | 2.162093                   | down       | noncoding | BC063571        |               | chr11 | -      |
| ASHG19A3A000077 | 0.03942         | 0.187234 | 2.142671                   | down       | noncoding | ENST00000398804 | RP11-184I16.2 | chr1  | -      |
| ASHG19A3A000077 | 0.03942         | 0.187234 | 2.142671                   | down       | noncoding | ENST00000398804 | RP11-184I16.2 | chr1  | -      |
| ASHG19A3A000077 | 0.03942         | 0.187234 | 2.142671                   | down       | noncoding | ENST00000398804 | RP11-184I16.2 | chr1  | -      |
| ASHG19A3A000077 | 0.03942         | 0.187234 | 2.142671                   | down       | noncoding | ENST00000398804 | RP11-184I16.2 | chr1  | -      |
| ASHG19A3A000077 | 0.03942         | 0.187234 | 2.142671                   | down       | noncoding | ENST00000398804 | RP11-184I16.2 | chr1  | -      |
| ASHG19A3A000077 | 0.03942         | 0.187234 | 2.142671                   | down       | noncoding | ENST00000398804 | RP11-184I16.2 | chr1  | -      |
| ASHG19A3A000077 | 0.03942         | 0.187234 | 2.142671                   | down       | noncoding | ENST00000398804 | RP11-184I16.2 | chr1  | -      |
| ASHG19A3A000077 | 0.03942         | 0.187234 | 2.142671                   | down       | noncoding | ENST00000398804 | RP11-184I16.2 | chr1  | -      |
| ASHG19A3A000077 | 0.03942         | 0.187234 | 2.142671                   | down       | noncoding | ENST00000398804 | RP11-184I16.2 | chr1  | -      |
| ASHG19A3A000077 | 0.03942         | 0.187234 | 2.142671                   | down       | noncoding | ENST00000398804 | RP11-184I16.2 | chr1  | -      |
| ASHG19A3A000077 | 0.03942         | 0.187234 | 2.142671                   | down       | noncoding | ENST00000398804 | RP11-184I16.2 | chr1  | -      |
| ASHG19A3A000081 | 0.040235        | 0.189019 | 2.212386                   | down       | noncoding | ENST00000400430 | RP11-350A18.1 | chr13 | -      |
| ASHG19A3A000095 | 0.002538        | 0.056079 | 2.086428                   | down       | noncoding | ENST00000412855 | RP11-396C23.2 | chr1  | +      |
| ASHG19A3A000102 | 0.015072        | 0.120916 | 2.293979                   | down       | noncoding | ENST00000413915 | RP11-613M10.6 | chr9  | +      |
| ASHG19A3A000456 | 0.024098        | 0.149621 | 2.092354                   | down       | noncoding | ENST00000506049 | AC005281.1    | chr7  | -      |
| ASHG19A3A000456 | 0.024098        | 0.149621 | 2.092354                   | down       | noncoding | ENST00000506049 | AC005281.1    | chr7  | -      |
| ASHG19A3A000474 | 0.037138        | 0.18222  | 2.032016                   | down       | noncoding | ENST00000509318 | AC068648.1    | chr12 | +      |
| ASHG19A3A007120 | 8.36E-06        | 0.012425 | 2.383303                   | down       | noncoding | NR_003098       | SNHG1         | chr11 | -      |
| ASHG19A3A007120 | 8.36E-06        | 0.012425 | 2.383303                   | down       | noncoding | NR_003098       | SNHG1         | chr11 | -      |
| ASHG19A3A007120 | 8.36E-06        | 0.012425 | 2.383303                   | down       | noncoding | NR_003098       | SNHG1         | chr11 | -      |
| ASHG19A3A007125 | 0.013036        | 0.114969 | 2.668877                   | down       | noncoding | NR_003111       | RPL32P3       | chr3  | -      |
| ASHG19A3A007254 | 0.042248        | 0.193839 | 2.314003                   | down       | noncoding | NR_024165       | ZNF323        | chr6  | -      |
| ASHG19A3A007254 | 0.042248        | 0.193839 | 2.314003                   | down       | noncoding | NR_024165       | ZNF323        | chr6  | -      |

|                 |          |          |          |      |           |                 |               |       |   |
|-----------------|----------|----------|----------|------|-----------|-----------------|---------------|-------|---|
| ASHG19A3A007254 | 0.042248 | 0.193839 | 2.314003 | down | noncoding | NR_024165       | ZNF323        | chr6  | - |
| ASHG19A3A007254 | 0.042248 | 0.193839 | 2.314003 | down | noncoding | NR_024165       | ZNF323        | chr6  | - |
| ASHG19A3A007294 | 4.29E-05 | 0.019365 | 2.402498 | down | noncoding | NR_024361       | FLJ10661      | chr8  | + |
| ASHG19A3A007339 | 6.32E-05 | 0.019365 | 2.413918 | down | noncoding | NR_024543       | SNHG7         | chr9  | - |
| ASHG19A3A007505 | 0.007691 | 0.089564 | 2.028393 | down | noncoding | NR_027353       | CD8A          | chr2  | - |
| ASHG19A3A007505 | 0.007691 | 0.089564 | 2.028393 | down | noncoding | NR_027353       | CD8A          | chr2  | - |
| ASHG19A3A007505 | 0.007691 | 0.089564 | 2.028393 | down | noncoding | NR_027353       | CD8A          | chr2  | - |
| ASHG19A3A007544 | 0.00039  | 0.028299 | 2.01724  | down | noncoding | NR_027624       | BZW2          | chr7  | + |
| ASHG19A3A007544 | 0.00039  | 0.028299 | 2.01724  | down | noncoding | NR_027624       | BZW2          | chr7  | + |
| ASHG19A3A007544 | 0.00039  | 0.028299 | 2.01724  | down | noncoding | NR_027624       | BZW2          | chr7  | + |
| ASHG19A3A007958 | 0.00534  | 0.075241 | 4.434238 | down | noncoding | ENST00000441860 | AC005773.1    | chr17 | - |
| ASHG19A3A008350 | 0.02993  | 0.165384 | 3.929718 | down | noncoding | ENST00000441371 | RP4-798P15.2  | chr1  | - |
| ASHG19A3A008388 | 0.018867 | 0.135313 | 2.446695 | down | noncoding | NR_027412       | LOC100130581  | chr17 | - |
| ASHG19A3A008665 | 0.010895 | 0.105638 | 2.440909 | down | noncoding | AK021817        |               | chr17 | - |
| ASHG19A3A008665 | 0.010895 | 0.105638 | 2.440909 | down | noncoding | AK021817        |               | chr17 | - |
| ASHG19A3A008707 | 0.035742 | 0.179356 | 2.38518  | down | noncoding | ENST00000461109 | AC016489.1    | chr17 | - |
| ASHG19A3A008756 | 0.019023 | 0.135777 | 2.195179 | down | noncoding | uc002jiu.1      | AK094963      | chr17 | - |
| ASHG19A3A009027 | 0.006509 | 0.082996 | 3.146909 | down | noncoding | ENST00000483947 | CTD-2545G14.1 | chr17 | + |
| ASHG19A3A009060 | 0.007273 | 0.087242 | 2.006337 | down | noncoding | U79273          |               | chr17 | + |
| ASHG19A3A009060 | 0.007273 | 0.087242 | 2.006337 | down | noncoding | U79273          |               | chr17 | + |
| ASHG19A3A009198 | 0.00226  | 0.054139 | 5.276909 | down | noncoding | ENST00000418183 | AC127537.6    | chr17 | + |
| ASHG19A3A009234 | 0.033262 | 0.173942 | 4.087737 | down | noncoding | ENST00000427400 | AC025627.2    | chr17 | + |
| ASHG19A3A009467 | 0.010701 | 0.104568 | 2.224452 | down | noncoding | G43039          |               | chr17 | + |
| ASHG19A3A009539 | 0.003708 | 0.06594  | 3.454953 | down | noncoding | ENST00000479088 | CTD-3193K9.1  | chr17 | + |
| ASHG19A3A009697 | 0.01341  | 0.115935 | 2.232435 | down | noncoding | ENST00000504601 | RP11-893F2.4  | chr17 | + |
| ASHG19A3A009727 | 0.030649 | 0.167477 | 2.566121 | down | noncoding | ENST00000487833 | RP11-506D12.1 | chr17 | + |
| ASHG19A3A009968 | 0.001351 | 0.043868 | 2.023269 | down | noncoding | AB073602        |               | chr17 | + |
| ASHG19A3A009975 | 0.028464 | 0.162131 | 2.363752 | down | noncoding | AK055500        |               | chr17 | + |
| ASHG19A3A010001 | 0.010576 | 0.103753 | 2.768025 | down | noncoding | AK057984        |               | chr17 | + |
| ASHG19A3A010020 | 0.028109 | 0.161381 | 2.186669 | down | noncoding | AK123925        |               | chr17 | + |
| ASHG19A3A010086 | 0.005061 | 0.073943 | 2.083228 | down | noncoding | NR_027022       | LOC127841     | chr1  | - |
| ASHG19A3A010192 | 0.024521 | 0.151183 | 2.630584 | down | noncoding | ENST00000473394 | RP11-268I9.1  | chr18 | - |
| ASHG19A3A010242 | 0.010985 | 0.106026 | 2.030374 | down | noncoding | ENST00000479112 | RP11-115P21.1 | chr18 | - |

|                 |          |          |          |      |           |                 |                 |       |   |
|-----------------|----------|----------|----------|------|-----------|-----------------|-----------------|-------|---|
| ASHG19A3A010242 | 0.010985 | 0.106026 | 2.030374 | down | noncoding | ENST00000479112 | RP11-115P21.1   | chr18 | - |
| ASHG19A3A010242 | 0.010985 | 0.106026 | 2.030374 | down | noncoding | ENST00000479112 | RP11-115P21.1   | chr18 | - |
| ASHG19A3A010242 | 0.010985 | 0.106026 | 2.030374 | down | noncoding | ENST00000479112 | RP11-115P21.1   | chr18 | - |
| ASHG19A3A010947 | 0.001207 | 0.043464 | 5.116287 | down | noncoding | ENST00000484151 | RP11-554K11.1   | chr1  | - |
| ASHG19A3A011180 | 0.030413 | 0.166704 | 2.552866 | down | noncoding | AK056565        |                 | chr19 | - |
| ASHG19A3A011180 | 0.030413 | 0.166704 | 2.552866 | down | noncoding | AK056565        |                 | chr19 | - |
| ASHG19A3A011203 | 0.007694 | 0.089564 | 2.11929  | down | noncoding | AK125289        |                 | chr19 | - |
| ASHG19A3A011203 | 0.007694 | 0.089564 | 2.11929  | down | noncoding | AK125289        |                 | chr19 | - |
| ASHG19A3A011856 | 0.035245 | 0.178551 | 2.743323 | down | noncoding | DQ655905        |                 | chr19 | - |
| ASHG19A3A011856 | 0.035245 | 0.178551 | 2.743323 | down | noncoding | DQ655905        |                 | chr19 | - |
| ASHG19A3A012534 | 0.001342 | 0.043868 | 2.219482 | down | noncoding | ENST00000509942 | AC008555.5      | chr19 | + |
| ASHG19A3A012590 | 0.004266 | 0.069883 | 2.153714 | down | noncoding | ENST00000418525 | RP11-169K16.4   | chr1  | - |
| ASHG19A3A012590 | 0.004266 | 0.069883 | 2.153714 | down | noncoding | ENST00000418525 | RP11-169K16.4   | chr1  | - |
| ASHG19A3A012656 | 0.000309 | 0.026401 | 2.482131 | down | noncoding | ENST00000426692 | RP4-597N16.1    | chr1  | - |
| ASHG19A3A012678 | 0.011696 | 0.108967 | 2.160779 | down | noncoding | ENST00000463711 | AC006133.3      | chr19 | + |
| ASHG19A3A012738 | 0.009739 | 0.099918 | 2.362186 | down | noncoding | ENST00000446199 | RP11-293G6__B.5 | chr1  | - |
| ASHG19A3A012871 | 0.03643  | 0.180995 | 2.18615  | down | noncoding | HIT000071394    |                 | chr19 | + |
| ASHG19A3A012871 | 0.03643  | 0.180995 | 2.18615  | down | noncoding | HIT000071394    |                 | chr19 | + |
| ASHG19A3A012871 | 0.03643  | 0.180995 | 2.18615  | down | noncoding | HIT000071394    |                 | chr19 | + |
| ASHG19A3A012874 | 0.001158 | 0.04271  | 2.188006 | down | noncoding | AF086466        |                 | chr19 | + |
| ASHG19A3A012991 | 0.016226 | 0.125874 | 2.045192 | down | noncoding | ENST00000422045 | AC008440.10     | chr19 | + |
| ASHG19A3A013120 | 0.010089 | 0.101049 | 3.275296 | down | noncoding | ENST00000478259 | CTC-258N23.1    | chr19 | + |
| ASHG19A3A013247 | 0.045955 | 0.202643 | 2.006413 | down | noncoding | ENST00000418970 | AC017076.4      | chr2  | - |
| ASHG19A3A013358 | 0.030832 | 0.167769 | 2.705147 | down | noncoding | ENST00000412424 | AC009411.1      | chr2  | - |
| ASHG19A3A013408 | 0.04163  | 0.19256  | 2.32624  | down | noncoding | uc002rhy.1      | AK125769        | chr2  | - |
| ASHG19A3A013487 | 0.018644 | 0.134381 | 2.443641 | down | noncoding | ENST00000431951 | AC068274.1      | chr2  | - |
| ASHG19A3A013527 | 0.037663 | 0.183536 | 5.155232 | down | noncoding | G43628          |                 | chr2  | - |
| ASHG19A3A014148 | 0.002245 | 0.054139 | 2.288278 | down | noncoding | ENST00000413151 | AC009505.4      | chr2  | - |
| ASHG19A3A014272 | 0.025658 | 0.154644 | 2.955955 | down | noncoding | ENST00000441053 | AC067960.1      | chr2  | - |
| ASHG19A3A014394 | 0.001622 | 0.046467 | 2.372394 | down | noncoding | ENST00000440802 | AC097532.2      | chr2  | - |
| ASHG19A3A014483 | 0.013491 | 0.116312 | 2.273059 | down | noncoding | ENST00000502203 | AL691432.1      | chr1  | + |
| ASHG19A3A014618 | 0.001503 | 0.044934 | 2.154153 | down | noncoding | AK095742        |                 | chr2  | - |
| ASHG19A3A014639 | 0.031133 | 0.168272 | 3.224505 | down | noncoding | ENST00000444235 | RPL5P7          | chr2  | - |

|                 |          |          |          |      |           |                 |               |       |   |
|-----------------|----------|----------|----------|------|-----------|-----------------|---------------|-------|---|
| ASHG19A3A014683 | 0.002938 | 0.058797 | 2.150046 | down | noncoding | uc002ulk.1      | DKFZp451M2119 | chr2  | - |
| ASHG19A3A014836 | 0.023044 | 0.147275 | 2.253832 | down | noncoding | uc002uvq.2      | BC039445      | chr2  | - |
| ASHG19A3A014843 | 0.006974 | 0.085581 | 2.626284 | down | noncoding | AK025184        |               | chr2  | - |
| ASHG19A3A014874 | 0.020367 | 0.139166 | 2.821379 | down | noncoding | ENST00000409819 | AC079354.3    | chr2  | - |
| ASHG19A3A014888 | 0.006663 | 0.083598 | 3.696429 | down | noncoding | ENST00000413895 | AC023271.2    | chr2  | - |
| ASHG19A3A015051 | 0.000564 | 0.034138 | 2.394651 | down | noncoding | HIT000098852    |               | chr2  | - |
| ASHG19A3A015115 | 0.03811  | 0.184219 | 3.254772 | down | noncoding | ENST00000413841 | AC105461.1    | chr2  | - |
| ASHG19A3A015534 | 0.014383 | 0.119483 | 2.330377 | down | noncoding | ENST00000431999 | C2orf58       | chr2  | + |
| ASHG19A3A015827 | 0.001474 | 0.044913 | 2.264637 | down | noncoding | ENST00000437188 | AC074008.1    | chr2  | + |
| ASHG19A3A015953 | 0.034055 | 0.175525 | 2.047068 | down | noncoding | HIT000324184_03 |               | chr2  | + |
| ASHG19A3A015961 | 0.019005 | 0.135728 | 2.104943 | down | noncoding | HIT000342137    |               | chr2  | + |
| ASHG19A3A016031 | 0.047837 | 0.206894 | 2.218634 | down | noncoding | AF119842        |               | chr2  | + |
| ASHG19A3A016059 | 0.039917 | 0.188172 | 2.056385 | down | noncoding | AK098124        |               | chr2  | + |
| ASHG19A3A016342 | 0.014789 | 0.120056 | 3.182251 | down | noncoding | ENST00000419523 | AC068137.5    | chr2  | + |
| ASHG19A3A016697 | 0.001396 | 0.044032 | 2.116423 | down | noncoding | ENST00000441026 | AC093639.1    | chr2  | + |
| ASHG19A3A016941 | 0.029111 | 0.16325  | 2.199422 | down | noncoding | ENST00000415479 | AC093850.2    | chr2  | + |
| ASHG19A3A017270 | 0.044182 | 0.197844 | 2.578533 | down | noncoding | AK021907        |               | chr20 | - |
| ASHG19A3A017415 | 0.005199 | 0.074637 | 3.651162 | down | noncoding | ENST00000419888 | RP5-1068E13.4 | chr20 | - |
| ASHG19A3A017527 | 0.005132 | 0.074236 | 4.579414 | down | noncoding | ENST00000418346 | MLLT10L       | chr20 | - |
| ASHG19A3A017834 | 0.013204 | 0.115563 | 2.359772 | down | noncoding | ENST00000503777 | AL035541.1    | chr20 | - |
| ASHG19A3A017977 | 0.000235 | 0.023089 | 2.293037 | down | noncoding | NR_027700       | NOP56         | chr20 | + |
| ASHG19A3A018539 | 0.003903 | 0.06684  | 2.263966 | down | noncoding | ENST00000433121 | RP5-908M14.5  | chr20 | + |
| ASHG19A3A018934 | 0.023757 | 0.148498 | 2.677749 | down | noncoding | ENST00000431150 | AP001628.6    | chr21 | - |
| ASHG19A3A019019 | 0.03912  | 0.186699 | 3.486542 | down | noncoding | ENST00000443593 | RP1-212P9.2   | chr1  | + |
| ASHG19A3A019065 | 0.046374 | 0.203893 | 2.131759 | down | noncoding | AF130090        |               | chr21 | + |
| ASHG19A3A019299 | 0.036208 | 0.180501 | 2.39234  | down | noncoding | NR_027085       | LOC284551     | chr1  | + |
| ASHG19A3A019429 | 0.005612 | 0.077321 | 3.22122  | down | noncoding | ENST00000429106 | AC006946.12   | chr22 | - |
| ASHG19A3A019456 | 0.005081 | 0.07395  | 2.961613 | down | noncoding | ENST00000481698 | AC000095.8    | chr22 | - |
| ASHG19A3A019863 | 6.46E-06 | 0.012425 | 2.690193 | down | noncoding | AK128410        |               | chr22 | - |
| ASHG19A3A019885 | 5.29E-05 | 0.019365 | 2.48524  | down | noncoding | ENST00000357802 | RP1-222E13.10 | chr22 | - |
| ASHG19A3A019886 | 5.78E-05 | 0.019365 | 2.446533 | down | noncoding | uc003bcs.2      | RRP7B         | chr22 | - |
| ASHG19A3A019905 | 0.044225 | 0.197978 | 4.347225 | down | noncoding | BC069767        |               | chr22 | - |
| ASHG19A3A019949 | 0.002393 | 0.054571 | 2.798728 | down | noncoding | ENST00000413815 | RP11-191L9.5  | chr22 | - |

|                 |          |          |          |      |           |                 |                        |       |   |
|-----------------|----------|----------|----------|------|-----------|-----------------|------------------------|-------|---|
| ASHG19A3A020026 | 0.044523 | 0.198661 | 2.259463 | down | noncoding | NR_001591       | psiTPTE22              | chr22 | + |
| ASHG19A3A020174 | 0.003661 | 0.065705 | 2.289567 | down | noncoding | ENST00000436538 | LL22NC03-80A10.11      | chr22 | + |
| ASHG19A3A020532 | 0.00249  | 0.055492 | 2.128411 | down | noncoding | ENST00000446663 | AL022237.3             | chr22 | + |
| ASHG19A3A020538 | 0.036079 | 0.180207 | 2.071712 | down | noncoding | ENST00000450750 | RP4-754E20__A.5        | chr22 | + |
| ASHG19A3A020608 | 0.016884 | 0.127494 | 2.107308 | down | noncoding | ENST00000450408 | RP3-355C18.7           | chr22 | + |
| ASHG19A3A020639 | 0.022717 | 0.146434 | 2.033758 | down | noncoding | ENST00000449338 | AC026214.2             | chr3  | - |
| ASHG19A3A021021 | 0.013833 | 0.117908 | 2.129387 | down | noncoding | ENST00000426743 | RP11-163G10.2          | chr1  | + |
| ASHG19A3A021412 | 0.007226 | 0.08694  | 2.266138 | down | noncoding | AK126393        |                        | chr3  | - |
| ASHG19A3A021571 | 2.64E-05 | 0.01651  | 2.345718 | down | noncoding | uc003emb.2      | RPL32P3                | chr3  | - |
| ASHG19A3A021587 | 0.023514 | 0.14785  | 2.445559 | down | noncoding | ENST00000504655 | RP11-93K22.8           | chr3  | - |
| ASHG19A3A021742 | 0.007102 | 0.08637  | 2.358985 | down | noncoding | ENST00000483312 | RP11-2G17.1            | chr3  | - |
| ASHG19A3A021832 | 0.003962 | 0.067099 | 3.780819 | down | noncoding | uc003fax.1      | AK056401               | chr3  | - |
| ASHG19A3A021835 | 0.002992 | 0.059511 | 2.012518 | down | noncoding | NR_003284       | PA2G4P4                | chr3  | - |
| ASHG19A3A021877 | 0.024237 | 0.150235 | 2.746739 | down | noncoding | ENST00000489012 | RP11-10O22.2           | chr3  | - |
| ASHG19A3A021986 | 0.019709 | 0.137167 | 3.183862 | down | noncoding | uc003fko.2      | DKFZp434A128           | chr3  | - |
| ASHG19A3A022165 | 0.003664 | 0.065705 | 2.261224 | down | noncoding | ENST00000453454 | AC024560.3             | chr3  | - |
| ASHG19A3A022277 | 0.000125 | 0.021847 | 2.167829 | down | noncoding | CR612570        |                        | chr3  | + |
| ASHG19A3A022356 | 0.00269  | 0.057065 | 2.411235 | down | noncoding | ENST00000418085 | AC114477.1             | chr3  | + |
| ASHG19A3A022543 | 0.002182 | 0.053387 | 2.492305 | down | noncoding | ENST00000442319 | RP11-681O4.1           | chr3  | + |
| ASHG19A3A022543 | 0.002182 | 0.053387 | 2.492305 | down | noncoding | ENST00000442319 | RP11-681O4.1           | chr3  | + |
| ASHG19A3A022825 | 0.002045 | 0.052424 | 2.127032 | down | noncoding | ENST00000489078 | RP11-413E6.7           | chr3  | + |
| ASHG19A3A023035 | 0.035348 | 0.178599 | 3.905619 | down | noncoding | CR598744        |                        | chr3  | + |
| ASHG19A3A023286 | 0.001941 | 0.050705 | 6.921262 | down | noncoding | ENST00000487630 | RP11-117F22.1          | chr3  | + |
| ASHG19A3A023688 | 0.008009 | 0.091309 | 2.202531 | down | noncoding | AK127405        |                        | chr3  | + |
| ASHG19A3A023836 | 0.041686 | 0.192641 | 3.985595 | down | noncoding | NR_033182       | LOC100130872-<br>SPON2 | chr4  | - |
| ASHG19A3A023836 | 0.041686 | 0.192641 | 3.985595 | down | noncoding | NR_033182       | LOC100130872-<br>SPON2 | chr4  | - |
| ASHG19A3A023836 | 0.041686 | 0.192641 | 3.985595 | down | noncoding | NR_033182       | LOC100130872-<br>SPON2 | chr4  | - |
| ASHG19A3A023959 | 0.000241 | 0.023374 | 2.147077 | down | noncoding | ENST00000506899 | RP11-22A3.2            | chr4  | - |
| ASHG19A3A023980 | 0.003719 | 0.06594  | 6.443847 | down | noncoding | AK026407        |                        | chr4  | - |
| ASHG19A3A024034 | 0.018654 | 0.134381 | 6.388343 | down | noncoding | ENST00000507819 | RP11-302F12.8          | chr4  | - |
| ASHG19A3A024430 | 0.013592 | 0.116817 | 2.380555 | down | noncoding | ENST00000513707 | RP11-576N17.4          | chr4  | - |



|                 |          |          |          |      |           |                 |                |      |   |
|-----------------|----------|----------|----------|------|-----------|-----------------|----------------|------|---|
| ASHG19A3A024893 | 0.003577 | 0.065203 | 2.056789 | down | noncoding | ENST00000505004 | RP11-627H22.11 | chr4 | - |
| ASHG19A3A024896 | 0.017673 | 0.12998  | 3.123033 | down | noncoding | ENST00000503214 | RP11-627H22.6  | chr4 | - |
| ASHG19A3A024899 | 0.026941 | 0.158057 | 5.821969 | down | noncoding | ENST00000510572 | RP11-627H22.3  | chr4 | - |
| ASHG19A3A024969 | 0.004305 | 0.070276 | 2.332269 | down | noncoding | ENST00000456663 | RP11-2B19.1    | chr1 | + |
| ASHG19A3A025250 | 0.029098 | 0.16325  | 2.090549 | down | noncoding | uc001dla.1      | AK125723       | chr1 | + |
| ASHG19A3A025250 | 0.029098 | 0.16325  | 2.090549 | down | noncoding | uc001dla.1      | AK125723       | chr1 | + |
| ASHG19A3A025250 | 0.029098 | 0.16325  | 2.090549 | down | noncoding | uc001dla.1      | AK125723       | chr1 | + |
| ASHG19A3A025295 | 0.008687 | 0.094819 | 3.618345 | down | noncoding | ENST00000514103 | RP11-1J7.1     | chr4 | + |
| ASHG19A3A025369 | 0.002779 | 0.057664 | 2.110192 | down | noncoding | ENST00000510905 | RP11-302F12.10 | chr4 | + |
| ASHG19A3A025419 | 0.000628 | 0.035659 | 2.060977 | down | noncoding | ENST00000503465 | RP11-83C7.1    | chr4 | + |
| ASHG19A3A025486 | 0.047683 | 0.206564 | 2.05572  | down | noncoding | AK094991        |                | chr4 | + |
| ASHG19A3A025620 | 0.012847 | 0.114126 | 2.831374 | down | noncoding | ENST00000510090 | RP11-618I10.2  | chr4 | + |
| ASHG19A3A025665 | 0.017158 | 0.128662 | 2.117902 | down | noncoding | ENST00000502790 | RP11-692D12.1  | chr4 | + |
| ASHG19A3A025665 | 0.017158 | 0.128662 | 2.117902 | down | noncoding | ENST00000502790 | RP11-692D12.1  | chr4 | + |
| ASHG19A3A025767 | 0.004893 | 0.072676 | 2.04069  | down | noncoding | ENST00000480094 | RP11-397E7.1   | chr4 | + |
| ASHG19A3A025807 | 0.036247 | 0.180501 | 2.740955 | down | noncoding | ENST00000478069 | RP11-398J16.1  | chr4 | + |
| ASHG19A3A025936 | 0.008861 | 0.095464 | 2.069558 | down | noncoding | ENST00000508637 | RP11-362M19.1  | chr4 | + |
| ASHG19A3A025953 | 4.13E-06 | 0.012395 | 2.439759 | down | noncoding | NR_003584       | SNHG8          | chr4 | + |
| ASHG19A3A026341 | 0.001091 | 0.041739 | 2.064588 | down | noncoding | ENST00000472309 | RP11-84H6.1    | chr4 | + |
| ASHG19A3A026486 | 0.043232 | 0.195574 | 2.654474 | down | noncoding | ENST00000514848 | CTD-2297D10.1  | chr5 | - |
| ASHG19A3A026732 | 0.000945 | 0.039493 | 2.134951 | down | noncoding | AL137450        |                | chr5 | - |
| ASHG19A3A027046 | 0.012842 | 0.114126 | 2.141644 | down | noncoding | ENST00000510378 | RPS23P5        | chr5 | - |
| ASHG19A3A027174 | 0.038937 | 0.186238 | 2.584382 | down | noncoding | ENST00000504798 | RP11-475J5.2   | chr5 | - |
| ASHG19A3A027275 | 0.036236 | 0.180501 | 2.478824 | down | noncoding | ENST00000513004 | RP11-74D3.1    | chr5 | - |
| ASHG19A3A027509 | 0.048906 | 0.209384 | 2.602209 | down | noncoding | AK127336        |                | chr5 | - |
| ASHG19A3A027634 | 0.010641 | 0.104185 | 4.526038 | down | noncoding | AK055284        |                | chr5 | - |
| ASHG19A3A027646 | 0.008791 | 0.095255 | 2.186181 | down | noncoding | AL833484        |                | chr5 | - |
| ASHG19A3A027712 | 0.030911 | 0.168027 | 2.864985 | down | noncoding | ENST00000377300 | CTC-281M20.1   | chr5 | - |
| ASHG19A3A027912 | 0.000354 | 0.027381 | 2.151156 | down | noncoding | ENST00000502001 | RP11-480D4.3   | chr5 | + |
| ASHG19A3A027931 | 0.01383  | 0.117908 | 2.023562 | down | noncoding | HIT000062015    |                | chr5 | + |
| ASHG19A3A028053 | 0.042356 | 0.194098 | 3.785611 | down | noncoding | ENST00000512207 | RP11-42L13.2   | chr5 | + |
| ASHG19A3A028616 | 0.000148 | 0.021847 | 2.992423 | down | noncoding | uc003kps.2      | tiga1          | chr5 | + |
| ASHG19A3A028617 | 0.002095 | 0.053063 | 2.274443 | down | noncoding | NR_015370       | NCRNA00219     | chr5 | + |



|                 |          |          |          |      |           |                 |                |      |   |
|-----------------|----------|----------|----------|------|-----------|-----------------|----------------|------|---|
| ASHG19A3A032114 | 0.037122 | 0.18222  | 2.321634 | down | noncoding | ENST00000407767 | RP3-406A7.3    | chr6 | + |
| ASHG19A3A032114 | 0.037122 | 0.18222  | 2.321634 | down | noncoding | ENST00000407767 | RP3-406A7.3    | chr6 | + |
| ASHG19A3A032114 | 0.037122 | 0.18222  | 2.321634 | down | noncoding | ENST00000407767 | RP3-406A7.3    | chr6 | + |
| ASHG19A3A032114 | 0.037122 | 0.18222  | 2.321634 | down | noncoding | ENST00000407767 | RP3-406A7.3    | chr6 | + |
| ASHG19A3A032114 | 0.037122 | 0.18222  | 2.321634 | down | noncoding | ENST00000407767 | RP3-406A7.3    | chr6 | + |
| ASHG19A3A032148 | 0.032716 | 0.172589 | 2.879538 | down | noncoding | ENST00000417650 | RP11-439L18.1  | chr6 | + |
| ASHG19A3A032328 | 0.003205 | 0.061295 | 2.236158 | down | noncoding | ENST00000455390 | RP11-514O12.2  | chr6 | + |
| ASHG19A3A032343 | 0.033024 | 0.173401 | 3.457418 | down | noncoding | ENST00000457340 | RP11-503C24.1  | chr6 | + |
| ASHG19A3A032394 | 0.000863 | 0.038861 | 2.50985  | down | noncoding | ENST00000453348 | AC074389.9     | chr7 | - |
| ASHG19A3A032436 | 0.016617 | 0.126992 | 2.060706 | down | noncoding | CR609520        |                | chr1 | + |
| ASHG19A3A032607 | 0.014701 | 0.11973  | 2.274067 | down | noncoding | ENST00000454851 | AC005105.2     | chr7 | - |
| ASHG19A3A032607 | 0.014701 | 0.11973  | 2.274067 | down | noncoding | ENST00000454851 | AC005105.2     | chr7 | - |
| ASHG19A3A032607 | 0.014701 | 0.11973  | 2.274067 | down | noncoding | ENST00000454851 | AC005105.2     | chr7 | - |
| ASHG19A3A032616 | 0.024007 | 0.149299 | 2.656628 | down | noncoding | ENST00000442865 | AC007255.7     | chr7 | - |
| ASHG19A3A032731 | 0.003517 | 0.064818 | 2.279475 | down | noncoding | ENST00000457315 | AC004692.4     | chr7 | - |
| ASHG19A3A032916 | 0.003812 | 0.066583 | 2.232323 | down | noncoding | ENST00000430604 | RP11-3N2.4     | chr7 | - |
| ASHG19A3A033019 | 0.014812 | 0.120056 | 2.366472 | down | noncoding | ENST00000419670 | NCF1C          | chr7 | - |
| ASHG19A3A033130 | 0.020828 | 0.140521 | 2.648028 | down | noncoding | ENST00000415667 | AC002069.7     | chr7 | - |
| ASHG19A3A033168 | 0.00619  | 0.080771 | 2.333249 | down | noncoding | ENST00000426330 | RP11-419N10.5  | chr1 | + |
| ASHG19A3A033662 | 0.042376 | 0.194098 | 2.163888 | down | noncoding | ENST00000481590 | TRBV8-1        | chr7 | - |
| ASHG19A3A033718 | 0.033763 | 0.175037 | 2.615068 | down | noncoding | AY927503        |                | chr7 | - |
| ASHG19A3A033727 | 0.022712 | 0.146434 | 2.038019 | down | noncoding | NR_027040       | LOC401431      | chr7 | - |
| ASHG19A3A033727 | 0.022712 | 0.146434 | 2.038019 | down | noncoding | NR_027040       | LOC401431      | chr7 | - |
| ASHG19A3A033760 | 0.00034  | 0.027381 | 2.475469 | down | noncoding | ENST00000445535 | RP11-25K21.4   | chr1 | + |
| ASHG19A3A033764 | 6.11E-05 | 0.019365 | 2.531321 | down | noncoding | NR_024151       | HSPA7          | chr1 | + |
| ASHG19A3A034227 | 0.016706 | 0.127366 | 2.743767 | down | noncoding | ENST00000426456 | AC011290.3     | chr7 | + |
| ASHG19A3A034298 | 0.01449  | 0.119693 | 2.23764  | down | noncoding | ENST00000400978 | FMO9P          | chr1 | + |
| ASHG19A3A034389 | 0.030747 | 0.167739 | 2.989755 | down | noncoding | ENST00000419236 | RP11-1217F2.10 | chr7 | + |
| ASHG19A3A034529 | 0.000807 | 0.037891 | 2.01463  | down | noncoding | ENST00000417100 | RP11-483G21.3  | chr7 | + |
| ASHG19A3A034675 | 0.025162 | 0.153619 | 2.384607 | down | noncoding | ENST00000444032 | AC002127.4     | chr7 | + |
| ASHG19A3A034857 | 0.036132 | 0.18041  | 2.103186 | down | noncoding | uc003vag.1      | BC085014       | chr7 | + |
| ASHG19A3A034857 | 0.036132 | 0.18041  | 2.103186 | down | noncoding | uc003vag.1      | BC085014       | chr7 | + |
| ASHG19A3A034900 | 0.009791 | 0.100197 | 2.971946 | down | noncoding | ENST00000433617 | AC005046.5     | chr7 | + |

|                 |          |          |          |      |           |                 |               |      |   |
|-----------------|----------|----------|----------|------|-----------|-----------------|---------------|------|---|
| ASHG19A3A035132 | 0.017407 | 0.128941 | 2.480264 | down | noncoding | uc003vts.1      | AK094915      | chr7 | + |
| ASHG19A3A035156 | 0.008733 | 0.095045 | 2.614748 | down | noncoding | ENST00000433683 | RP11-296O14.1 | chr1 | + |
| ASHG19A3A035205 | 0.022787 | 0.146629 | 2.052684 | down | noncoding | ENST00000456572 | TRBV26        | chr7 | + |
| ASHG19A3A035252 | 0.033427 | 0.174321 | 2.212143 | down | noncoding | ENST00000473586 | OR2A41P       | chr7 | + |
| ASHG19A3A035430 | 0.004697 | 0.071916 | 2.776921 | down | noncoding | ENST00000457337 | AC019084.7    | chr7 | + |
| ASHG19A3A035504 | 0.006183 | 0.080753 | 2.758265 | down | noncoding | BC040270        |               | chr8 | - |
| ASHG19A3A035504 | 0.006183 | 0.080753 | 2.758265 | down | noncoding | BC040270        |               | chr8 | - |
| ASHG19A3A035579 | 0.015747 | 0.123899 | 5.508182 | down | noncoding | ENST00000465586 | AC100802.2    | chr8 | - |
| ASHG19A3A035683 | 0.002822 | 0.057716 | 6.326741 | down | noncoding | ENST00000468780 | RP1-155O2.1   | chr8 | - |
| ASHG19A3A035890 | 0.004564 | 0.071744 | 2.353622 | down | noncoding | ENST00000463217 | RP11-508K19.1 | chr8 | - |
| ASHG19A3A036148 | 0.019793 | 0.137395 | 3.080754 | down | noncoding | NR_026684       | HPYR1         | chr8 | - |
| ASHG19A3A036183 | 0.007051 | 0.086119 | 2.959763 | down | noncoding | ENST00000414169 | RP1-223H12.4  | chr1 | + |
| ASHG19A3A036302 | 0.000502 | 0.032189 | 2.910167 | down | noncoding | ENST00000438784 | AF228730.4    | chr8 | + |
| ASHG19A3A037162 | 0.024974 | 0.153072 | 2.291163 | down | noncoding | AK127092        |               | chr9 | - |
| ASHG19A3A037162 | 0.024974 | 0.153072 | 2.291163 | down | noncoding | AK127092        |               | chr9 | - |
| ASHG19A3A037201 | 0.033304 | 0.174069 | 2.184918 | down | noncoding | uc003zpr.2      | CR627240      | chr9 | - |
| ASHG19A3A037359 | 0.023361 | 0.147746 | 2.448487 | down | noncoding | uc004aaz.1      | CR607939      | chr9 | - |
| ASHG19A3A037646 | 0.011067 | 0.106507 | 2.648641 | down | noncoding | ENST00000439544 | RP11-213G2.2  | chr9 | - |
| ASHG19A3A037864 | 0.030685 | 0.167477 | 3.239076 | down | noncoding | ENST00000435770 | RPL36AP6      | chr9 | - |
| ASHG19A3A038189 | 0.025036 | 0.153164 | 2.215969 | down | noncoding | ENST00000452377 | RP11-399H11.3 | chr9 | - |
| ASHG19A3A038233 | 0.002118 | 0.053191 | 2.322086 | down | noncoding | CR599011        |               | chr9 | - |
| ASHG19A3A038293 | 0.002344 | 0.054416 | 2.749617 | down | noncoding | ENST00000455592 | RP11-165F24.2 | chr9 | + |
| ASHG19A3A038362 | 0.045222 | 0.200587 | 2.259926 | down | noncoding | ENST00000437701 | RP11-87N24.1  | chr9 | + |
| ASHG19A3A038474 | 0.01044  | 0.102891 | 2.04048  | down | noncoding | BC043200        |               | chr9 | + |
| ASHG19A3A038625 | 0.028956 | 0.16302  | 2.865199 | down | noncoding | ENST00000455231 | AC129778.6    | chr9 | + |
| ASHG19A3A038705 | 0.018446 | 0.133388 | 2.253162 | down | noncoding | ENST00000444223 | RP11-236F9.6  | chr9 | + |
| ASHG19A3A038741 | 0.016791 | 0.12738  | 2.043936 | down | noncoding | ENST00000419576 | RP11-561O23.7 | chr9 | + |
| ASHG19A3A038755 | 0.036912 | 0.181768 | 2.137951 | down | noncoding | ENST00000421166 | RP4-681L3.2   | chr1 | + |
| ASHG19A3A038755 | 0.036912 | 0.181768 | 2.137951 | down | noncoding | ENST00000421166 | RP4-681L3.2   | chr1 | + |
| ASHG19A3A038764 | 0.040679 | 0.190213 | 2.647594 | down | noncoding | CR618740        |               | chr9 | + |
| ASHG19A3A038764 | 0.040679 | 0.190213 | 2.647594 | down | noncoding | CR618740        |               | chr9 | + |
| ASHG19A3A038764 | 0.040679 | 0.190213 | 2.647594 | down | noncoding | CR618740        |               | chr9 | + |
| ASHG19A3A038764 | 0.040679 | 0.190213 | 2.647594 | down | noncoding | CR618740        |               | chr9 | + |

|                 |          |          |          |      |           |                 |               |      |   |
|-----------------|----------|----------|----------|------|-----------|-----------------|---------------|------|---|
| ASHG19A3A038764 | 0.040679 | 0.190213 | 2.647594 | down | noncoding | CR618740        |               | chr9 | + |
| ASHG19A3A038764 | 0.040679 | 0.190213 | 2.647594 | down | noncoding | CR618740        |               | chr9 | + |
| ASHG19A3A038764 | 0.040679 | 0.190213 | 2.647594 | down | noncoding | CR618740        |               | chr9 | + |
| ASHG19A3A038834 | 0.013424 | 0.115935 | 2.42742  | down | noncoding | uc004amd.2      | BC036431      | chr9 | + |
| ASHG19A3A038911 | 0.011528 | 0.108484 | 2.707468 | down | noncoding | ENST00000444374 | RP11-316P17.2 | chr9 | + |
| ASHG19A3A039231 | 0.035983 | 0.180022 | 2.001748 | down | noncoding | ENST00000438380 | RP11-175D17.3 | chr9 | + |
| ASHG19A3A039231 | 0.035983 | 0.180022 | 2.001748 | down | noncoding | ENST00000438380 | RP11-175D17.3 | chr9 | + |
| ASHG19A3A039371 | 0.015452 | 0.122859 | 2.338008 | down | noncoding | ENST00000499608 | AL445645.1    | chr9 | + |
| ASHG19A3A039371 | 0.015452 | 0.122859 | 2.338008 | down | noncoding | ENST00000499608 | AL445645.1    | chr9 | + |
| ASHG19A3A039371 | 0.015452 | 0.122859 | 2.338008 | down | noncoding | ENST00000499608 | AL445645.1    | chr9 | + |
| ASHG19A3A039424 | 0.029116 | 0.16325  | 2.183145 | down | noncoding | ENST00000455039 | RP11-426A6.7  | chr9 | + |
| ASHG19A3A039457 | 0.00303  | 0.060046 | 2.278195 | down | noncoding | uc004cib.1      | AX747706      | chr9 | + |
| ASHG19A3A039749 | 0.037602 | 0.183473 | 2.664808 | down | noncoding | ENST00000431646 | RP11-157D23.1 | chrX | - |
| ASHG19A3A039869 | 0.01659  | 0.126992 | 2.011057 | down | noncoding | G65570          |               | chrX | - |
| ASHG19A3A039869 | 0.01659  | 0.126992 | 2.011057 | down | noncoding | G65570          |               | chrX | - |
| ASHG19A3A040120 | 0.000412 | 0.029082 | 7.86327  | down | noncoding | ENST00000395439 | RP4-581F12.2  | chrX | - |
| ASHG19A3A040177 | 0.000763 | 0.037247 | 2.62497  | down | noncoding | uc004egm.2      | CR623706      | chrX | - |
| ASHG19A3A040183 | 0.038425 | 0.184851 | 3.628567 | down | noncoding | ENST00000416788 | RP11-410C4.1  | chr1 | + |
| ASHG19A3A040339 | 0.021688 | 0.143365 | 2.010708 | down | noncoding | ENST00000429708 | RP3-525N14.3  | chrX | - |
| ASHG19A3A040476 | 0.006372 | 0.081861 | 2.05439  | down | noncoding | ENST00000419392 | RP11-51C14.2  | chrX | - |
| ASHG19A3A040552 | 0.001915 | 0.050453 | 2.112628 | down | noncoding | ENST00000445091 | MOAP1         | chrX | - |
| ASHG19A3A041047 | 0.010953 | 0.105992 | 2.212874 | down | noncoding | ENST00000426602 | RP11-161N3.3  | chrX | + |
| ASHG19A3A041414 | 0.034383 | 0.176397 | 2.1125   | down | noncoding | NR_033132       | ALG13         | chrX | + |
| ASHG19A3A041414 | 0.034383 | 0.176397 | 2.1125   | down | noncoding | NR_033132       | ALG13         | chrX | + |
| ASHG19A3A041414 | 0.034383 | 0.176397 | 2.1125   | down | noncoding | NR_033132       | ALG13         | chrX | + |
| ASHG19A3A041414 | 0.034383 | 0.176397 | 2.1125   | down | noncoding | NR_033132       | ALG13         | chrX | + |
| ASHG19A3A041480 | 0.002898 | 0.058351 | 3.899499 | down | noncoding | ENST00000436852 | RP11-229N15.1 | chrX | + |
| ASHG19A3A041790 | 0.022625 | 0.146364 | 2.162416 | down | noncoding | uc004fnm.2      | U00684        | chrX | + |
| ASHG19A3A042082 | 0.03805  | 0.184074 | 2.08893  | down | noncoding | NR_001545       | TTY15         | chrY | + |
| ASHG19A3A042183 | 0.047609 | 0.20642  | 2.077628 | down | noncoding | ENST00000444350 | AC009947.2    | chrY | + |
| ASHG19A3A042255 | 0.015574 | 0.123238 | 3.285196 | down | noncoding | ENST00000427498 | RP11-513D4.2  | chr1 | + |
| ASHG19A3A042255 | 0.015574 | 0.123238 | 3.285196 | down | noncoding | ENST00000427498 | RP11-513D4.2  | chr1 | + |
| ASHG19A3A042255 | 0.015574 | 0.123238 | 3.285196 | down | noncoding | ENST00000427498 | RP11-513D4.2  | chr1 | + |

|                 |          |          |          |      |           |                 |               |       |   |
|-----------------|----------|----------|----------|------|-----------|-----------------|---------------|-------|---|
| ASHG19A3A042258 | 0.001118 | 0.042382 | 2.212714 | down | noncoding | ENST00000439562 | RP11-261C10.5 | chr1  | + |
| ASHG19A3A042258 | 0.001118 | 0.042382 | 2.212714 | down | noncoding | ENST00000439562 | RP11-261C10.5 | chr1  | + |
| ASHG19A3A042258 | 0.001118 | 0.042382 | 2.212714 | down | noncoding | ENST00000439562 | RP11-261C10.5 | chr1  | + |
| ASHG19A3A042645 | 0.019627 | 0.136913 | 2.620278 | down | noncoding | ENST00000446298 | AL031601.3    | chr10 | - |
| ASHG19A3A042723 | 0.024203 | 0.150085 | 2.356218 | down | noncoding | ENST00000422732 | RP11-314P12.2 | chr10 | - |
| ASHG19A3A042725 | 0.003362 | 0.062823 | 2.212923 | down | noncoding | ENST00000421426 | RP11-314P12.3 | chr10 | - |
| ASHG19A3A042752 | 0.038826 | 0.186067 | 2.078831 | down | noncoding | uc009xny.1      | AK309922      | chr10 | - |
| ASHG19A3A043676 | 0.008259 | 0.09291  | 2.316288 | down | noncoding | ENST00000419987 | RP11-188P8.2  | chr10 | + |
| ASHG19A3A043876 | 0.003569 | 0.065203 | 2.296736 | down | noncoding | ENST00000436165 | OR6D1P        | chr10 | + |
| ASHG19A3A044734 | 0.016463 | 0.126598 | 2.128987 | down | noncoding | ENST00000515874 | AP006623.1    | chr11 | - |
| ASHG19A3A044734 | 0.016463 | 0.126598 | 2.128987 | down | noncoding | ENST00000515874 | AP006623.1    | chr11 | - |
| ASHG19A3A044734 | 0.016463 | 0.126598 | 2.128987 | down | noncoding | ENST00000515874 | AP006623.1    | chr11 | - |
| ASHG19A3A044734 | 0.016463 | 0.126598 | 2.128987 | down | noncoding | ENST00000515874 | AP006623.1    | chr11 | - |
| ASHG19A3A044734 | 0.016463 | 0.126598 | 2.128987 | down | noncoding | ENST00000515874 | AP006623.1    | chr11 | - |
| ASHG19A3A044734 | 0.016463 | 0.126598 | 2.128987 | down | noncoding | ENST00000515874 | AP006623.1    | chr11 | - |
| ASHG19A3A044734 | 0.016463 | 0.126598 | 2.128987 | down | noncoding | ENST00000515874 | AP006623.1    | chr11 | - |
| ASHG19A3A044734 | 0.016463 | 0.126598 | 2.128987 | down | noncoding | ENST00000515874 | AP006623.1    | chr11 | - |
| ASHG19A3A045508 | 0.003555 | 0.065189 | 2.080518 | down | noncoding | AL117542        |               | chr11 | - |
| ASHG19A3A045560 | 0.004151 | 0.068507 | 2.239852 | down | noncoding | AK129942        |               | chr11 | - |
| ASHG19A3A045615 | 0.00981  | 0.100197 | 3.405255 | down | noncoding | ENST00000454802 | RP4-800M22.4  | chr1  | - |
| ASHG19A3A045615 | 0.00981  | 0.100197 | 3.405255 | down | noncoding | ENST00000454802 | RP4-800M22.4  | chr1  | - |
| ASHG19A3A045615 | 0.00981  | 0.100197 | 3.405255 | down | noncoding | ENST00000454802 | RP4-800M22.4  | chr1  | - |
| ASHG19A3A046700 | 0.034436 | 0.176397 | 2.042752 | down | noncoding | BC015237        |               | chr11 | + |
| ASHG19A3A046728 | 0.019887 | 0.137577 | 2.263417 | down | noncoding | ENST00000500163 | AP003065.3    | chr11 | + |
| ASHG19A3A046728 | 0.019887 | 0.137577 | 2.263417 | down | noncoding | ENST00000500163 | AP003065.3    | chr11 | + |
| ASHG19A3A046728 | 0.019887 | 0.137577 | 2.263417 | down | noncoding | ENST00000500163 | AP003065.3    | chr11 | + |
| ASHG19A3A046729 | 0.000551 | 0.033694 | 2.795194 | down | noncoding | ENST00000464109 | RP11-31L22.2  | chr11 | + |
| ASHG19A3A046729 | 0.000551 | 0.033694 | 2.795194 | down | noncoding | ENST00000464109 | RP11-31L22.2  | chr11 | + |
| ASHG19A3A046729 | 0.000551 | 0.033694 | 2.795194 | down | noncoding | ENST00000464109 | RP11-31L22.2  | chr11 | + |
| ASHG19A3A046736 | 0.029165 | 0.163281 | 2.208656 | down | noncoding | AK094727        |               | chr11 | + |
| ASHG19A3A046931 | 0.008618 | 0.094754 | 2.129808 | down | noncoding | BC063618        |               | chr11 | + |
| ASHG19A3A047171 | 0.025385 | 0.153928 | 2.274155 | down | noncoding | NR_026823       | FAM138D       | chr12 | - |
| ASHG19A3A047181 | 0.020094 | 0.138032 | 2.294235 | down | noncoding | ENST00000415549 | RP4-650F12.4  | chr1  | - |
| ASHG19A3A047181 | 0.020094 | 0.138032 | 2.294235 | down | noncoding | ENST00000415549 | RP4-650F12.4  | chr1  | - |

|                 |          |          |          |      |           |                 |               |       |   |
|-----------------|----------|----------|----------|------|-----------|-----------------|---------------|-------|---|
| ASHG19A3A047181 | 0.020094 | 0.138032 | 2.294235 | down | noncoding | ENST00000415549 | RP4-650F12.4  | chr1  | - |
| ASHG19A3A047186 | 0.009242 | 0.097712 | 2.154858 | down | noncoding | uc001qiy.2      | BC039168      | chr12 | - |
| ASHG19A3A047456 | 0.02163  | 0.143176 | 2.497087 | down | noncoding | ENST00000471002 | RP11-820K3.1  | chr12 | - |
| ASHG19A3A047650 | 0.033143 | 0.173745 | 4.493712 | down | noncoding | ENST00000513381 | RP11-834C11.5 | chr12 | - |
| ASHG19A3A047767 | 0.005071 | 0.07395  | 4.405399 | down | noncoding | ENST00000481157 | RP11-766N7.1  | chr12 | - |
| ASHG19A3A048280 | 0.038652 | 0.185526 | 2.339947 | down | noncoding | S79267          |               | chr12 | + |
| ASHG19A3A048280 | 0.038652 | 0.185526 | 2.339947 | down | noncoding | S79267          |               | chr12 | + |
| ASHG19A3A048280 | 0.038652 | 0.185526 | 2.339947 | down | noncoding | S79267          |               | chr12 | + |
| ASHG19A3A048280 | 0.038652 | 0.185526 | 2.339947 | down | noncoding | S79267          |               | chr12 | + |
| ASHG19A3A048280 | 0.038652 | 0.185526 | 2.339947 | down | noncoding | S79267          |               | chr12 | + |
| ASHG19A3A048667 | 0.046764 | 0.204467 | 2.449514 | down | noncoding | NR_026655       | FLJ12825      | chr12 | + |
| ASHG19A3A048932 | 0.003817 | 0.066583 | 2.050917 | down | noncoding | ENST00000470084 | RP11-129B9.1  | chr12 | + |
| ASHG19A3A049214 | 0.047116 | 0.205361 | 2.121479 | down | noncoding | G65566          |               | chr12 | + |
| ASHG19A3A049322 | 0.008025 | 0.091309 | 2.550608 | down | noncoding | ENST00000434100 | TPTE2P1       | chr13 | - |
| ASHG19A3A049530 | 0.039892 | 0.188111 | 2.070249 | down | noncoding | NR_029429       | LOC441897     | chr1  | - |
| ASHG19A3A049818 | 0.016341 | 0.12618  | 2.303545 | down | noncoding | ENST00000415853 | RP11-357L1.1  | chr13 | - |
| ASHG19A3A050188 | 0.000105 | 0.021847 | 2.689466 | down | noncoding | NR_002605       | DLEU1         | chr13 | + |
| ASHG19A3A050616 | 0.031004 | 0.16813  | 2.011503 | down | noncoding | BC045654        |               | chr14 | - |
| ASHG19A3A050816 | 0.004671 | 0.071878 | 2.127847 | down | noncoding | NR_027123       | C14orf33      | chr14 | - |
| ASHG19A3A050816 | 0.004671 | 0.071878 | 2.127847 | down | noncoding | NR_027123       | C14orf33      | chr14 | - |
| ASHG19A3A050816 | 0.004671 | 0.071878 | 2.127847 | down | noncoding | NR_027123       | C14orf33      | chr14 | - |
| ASHG19A3A050816 | 0.004671 | 0.071878 | 2.127847 | down | noncoding | NR_027123       | C14orf33      | chr14 | - |
| ASHG19A3A051052 | 0.005951 | 0.079302 | 2.185089 | down | noncoding | AK055958        |               | chr14 | - |
| ASHG19A3A051129 | 0.015771 | 0.123899 | 2.042552 | down | noncoding | uc009wiv.1      | GnRHRII       | chr1  | - |
| ASHG19A3A051129 | 0.015771 | 0.123899 | 2.042552 | down | noncoding | uc009wiv.1      | GnRHRII       | chr1  | - |
| ASHG19A3A051129 | 0.015771 | 0.123899 | 2.042552 | down | noncoding | uc009wiv.1      | GnRHRII       | chr1  | - |
| ASHG19A3A051348 | 0.037208 | 0.182443 | 2.152385 | down | noncoding | ENST00000475149 | RP11-114O13.1 | chr14 | + |
| ASHG19A3A051423 | 0.034319 | 0.176333 | 2.025373 | down | noncoding | ENST00000504267 | AL079307.3    | chr14 | + |
| ASHG19A3A051564 | 0.023442 | 0.147796 | 2.006614 | down | noncoding | NR_027055       | FAM41C        | chr1  | - |
| ASHG19A3A051645 | 0.029344 | 0.163646 | 2.252188 | down | noncoding | AK125200        |               | chr14 | + |
| ASHG19A3A051822 | 0.014956 | 0.120462 | 3.589393 | down | noncoding | ENST00000488133 | CTD-2538G10.1 | chr14 | + |
| ASHG19A3A051829 | 0.028348 | 0.161844 | 2.502509 | down | noncoding | ENST00000494237 | RP11-45P15.2  | chr14 | + |
| ASHG19A3A051859 | 0.034556 | 0.176831 | 2.074716 | down | noncoding | ENST00000450804 | AL512356.1    | chr14 | + |

|                  |          |          |          |      |           |                           |                    |       |   |
|------------------|----------|----------|----------|------|-----------|---------------------------|--------------------|-------|---|
| ASHG19A3A051878  | 0.002601 | 0.056279 | 2.166295 | down | noncoding | BC038771                  |                    | chr14 | + |
| ASHG19A3A051942  | 0.002165 | 0.053387 | 2.074328 | down | noncoding | HIT000019412              |                    | chr15 | - |
| ASHG19A3A052204  | 0.00368  | 0.065718 | 2.34537  | down | noncoding | AK025072                  |                    | chr15 | - |
| ASHG19A3A052363  | 0.000763 | 0.037247 | 2.280311 | down | noncoding | AL360257                  |                    | chr15 | - |
| ASHG19A3A052552  | 0.002631 | 0.056689 | 2.48072  | down | noncoding | AL110293                  |                    | chr15 | - |
| ASHG19A3A052606  | 0.00041  | 0.029074 | 2.010359 | down | noncoding | AK130759                  |                    | chr15 | - |
| ASHG19A3A053171  | 0.043807 | 0.197167 | 2.841649 | down | noncoding | ENST00000499050           | AC105339.2         | chr15 | + |
| ASHG19A3A053171  | 0.043807 | 0.197167 | 2.841649 | down | noncoding | ENST00000499050           | AC105339.2         | chr15 | + |
| ASHG19A3A053289  | 0.001486 | 0.044913 | 2.315183 | down | noncoding | AL109706                  |                    | chr15 | + |
| ASHG19A3A053463  | 0.02078  | 0.140518 | 2.164876 | down | noncoding | CR600549                  |                    | chr16 | - |
| ASHG19A3A053463  | 0.02078  | 0.140518 | 2.164876 | down | noncoding | CR600549                  |                    | chr16 | - |
| ASHG19A3A053583  | 0.004844 | 0.072568 | 2.903362 | down | noncoding | NR_027460                 | RRN3P3             | chr16 | - |
| ASHG19A3A053813  | 0.0108   | 0.105139 | 2.189526 | down | noncoding | ENST00000487776           | CTD-2503H21.1      | chr16 | - |
| ASHG19A3A054016  | 0.008139 | 0.092117 | 2.260309 | down | noncoding | AK000958                  |                    | chr16 | - |
| ASHG19A3A054225  | 0.011614 | 0.108779 | 2.054807 | down | noncoding | uc002cuo.1                | FLJ39639           | chr16 | + |
| ASHG19A3A054483  | 0.028374 | 0.16185  | 2.385237 | down | noncoding | uc002dy1.1                | CR613685           | chr16 | + |
| ASHG19A3A054924  | 0.019917 | 0.13766  | 2.273617 | down | noncoding | ENST00000426573           | RP4-738P11.4       | chr1  | - |
| ASHG19A3A054953  | 0.010305 | 0.102108 | 2.374051 | down | noncoding | HIT000221810_04           |                    | chr16 | + |
| ASHG19A3A055081  | 0.003582 | 0.065203 | 2.394999 | down | noncoding | uc001hpx.2                | BC032899           | chr1  | + |
| ASHG19A3A055190  | 0.014603 | 0.119693 | 2.027972 | down | noncoding | uc003eie.3                | LOC100125556       | chr3  | + |
| ASHG19A3A055190  | 0.014603 | 0.119693 | 2.027972 | down | noncoding | uc003eie.3                | LOC100125556       | chr3  | + |
| ASHG19A3A055191  | 0.001043 | 0.041423 | 2.274979 | down | noncoding | uc003enb.1                | CR593374           | chr3  | + |
| ASHG19A3A055287  | 0.049889 | 0.211924 | 2.470194 | down | noncoding | uc010guv.1                | BC054862           | chr22 | - |
| ASHG19A3H0000054 | 0.027755 | 0.16033  | 3.653583 | down | noncoding | nc-HOXB4-176-             | nc-HOXB4-176       | chr17 | - |
| ASHG19A3H0000106 | 0.007436 | 0.08808  | 2.864333 | down | noncoding | nc-HOXC10-127-            | nc-HOXC10-127      | chr12 | + |
| ASHG19A3L0000009 | 0.023223 | 0.147746 | 2.115111 | down | noncoding | BX104325                  | lincRNA-FAM102B-1  | chr1  | + |
| ASHG19A3L0000018 | 0.004875 | 0.072676 | 2.571236 | down | noncoding | chr1:116797827-116838952- | lincRNA-C1orf161   | chr1  | - |
| ASHG19A3L0000032 | 0.034486 | 0.176531 | 2.17103  | down | noncoding | DB327252                  | lincRNA-PBX1-3     | chr1  | - |
| ASHG19A3L0000065 | 0.039811 | 0.18793  | 2.396782 | down | noncoding | chr1:203164802-203174902+ | lincRNA-CHIT1      | chr1  | + |
| ASHG19A3L0000128 | 0.033147 | 0.173745 | 2.01786  | down | noncoding | chr1:39116163-39128263+   | lincRNA-RRAGC-1    | chr1  | + |
| ASHG19A3L0000144 | 0.023866 | 0.148837 | 2.746458 | down | noncoding | exon95+                   | lincRNA-KNCN       | chr1  | + |
| ASHG19A3L0000208 | 0.011661 | 0.108779 | 2.064264 | down | noncoding | BX101441                  | lincRNA-C10orf46-1 | chr10 | + |



|                      |          |          |          |      |           |                            |                   |       |   |
|----------------------|----------|----------|----------|------|-----------|----------------------------|-------------------|-------|---|
| ASHG19A3L0000311     | 0.02339  | 0.147746 | 2.304509 | down | noncoding | exon848+                   | lincRNA-ZW10      | chr11 | + |
| ASHG19A3L0000337     | 0.000494 | 0.031999 | 2.20037  | down | noncoding | W19582                     | lincRNA-ETS1-2    | chr11 | + |
| ASHG19A3L0000343     | 0.010525 | 0.103385 | 2.037713 | down | noncoding | CV346902                   | lincRNA-TMEM45B-1 | chr11 | + |
| ASHG19A3L0000397     | 0.038424 | 0.184851 | 2.651217 | down | noncoding | BG946037                   | lincRNA-MYEOV-3   | chr11 | + |
| ASHG19A3L0000455     | 0.040104 | 0.188697 | 2.072451 | down | noncoding | chr12:132296472-132307497- | lincRNA-SFSWAP-1  | chr12 | - |
| ASHG19A3L0000591     | 0.032106 | 0.171159 | 2.560613 | down | noncoding | CD102777                   | lincRNA-TPTE2     | chr13 | - |
| ASHG19A3L0001043     | 0.019283 | 0.136226 | 2.553375 | down | noncoding | DB335899                   | lincRNA-TMEM177   | chr2  | - |
| ASHG19A3L0001167     | 0.037494 | 0.183129 | 2.006733 | down | noncoding | chr2:237543636-237554786-  | lincRNA-CXCR7-1   | chr2  | - |
| ASHG19A3L0001205     | 0.017868 | 0.130554 | 2.396946 | down | noncoding | CN289466                   | lincRNA-MEIS1-1   | chr2  | - |
| ASHG19A3L0001219     | 0.023597 | 0.148111 | 2.073582 | down | noncoding | BX101700                   | lincRNA-TACR1-1   | chr2  | - |
| ASHG19A3L0001452     | 0.025657 | 0.154644 | 2.086607 | down | noncoding | BG677629                   | lincRNA-ARSJ-2    | chr4  | - |
| ASHG19A3L0001655     | 0.024678 | 0.151729 | 2.251444 | down | noncoding | chr5:49632068-49662143-    | lincRNA-HCN1-1    | chr5  | - |
| ASHG19A3L0001712     | 0.04687  | 0.204692 | 2.540981 | down | noncoding | AA935188                   | lincRNA-MCM9      | chr6  | + |
| ASHG19A3L0001747     | 0.001941 | 0.050705 | 3.579691 | down | noncoding | chr6:150606082-150619632-  | lincRNA-PPP1R14C  | chr6  | - |
| ASHG19A3L0001752     | 0.02401  | 0.149299 | 2.262814 | down | noncoding | BE439827                   | lincRNA-MAS1      | chr6  | - |
| ASHG19A3L0001877     | 0.032895 | 0.172925 | 2.628164 | down | noncoding | chr7:143147778-143169303-  | lincRNA-TAS2R60   | chr7  | - |
| ASHG19A3L0001899     | 0.002336 | 0.054416 | 2.112652 | down | noncoding | BF056782                   | lincRNA-ABCB5     | chr7  | + |
| ASHG19A3L0002180     | 0.042289 | 0.193875 | 2.330969 | down | noncoding | chr8:99342599-99355474+    | lincRNA-KCNS2-1   | chr8  | + |
| ASHG19A3L0002286     | 0.039519 | 0.187234 | 2.284666 | down | noncoding | chrX:20419404-20431504+    | lincRNA-CNKS2-2   | chrX  | + |
| ASHG19A3L0002436     | 0.004616 | 0.071865 | 2.041173 | down | noncoding | chr9:20028084-20041430+    | lincRNA-MLLT3-1   | chr9  | + |
| ASHG19A3L0002544     | 0.00696  | 0.085581 | 2.143154 | down | noncoding | BM805159                   | lincRNA-THSD7A-2  | chr7  | + |
| ASHG19A3L0002704     | 0.033031 | 0.173401 | 2.27156  | down | noncoding | BG210561                   | lincRNA-AGRP-2    | chr16 | - |
| ASHG19A3L0002906     | 0.023412 | 0.147746 | 2.369174 | down | noncoding | CF887548                   | lincRNA-NEDD1-3   | chr12 | + |
| ASHG19A3L0002962     | 0.002688 | 0.057065 | 2.148681 | down | noncoding | AA769057                   | lincRNA-UBE2G1    | chr17 | - |
| ASHG19A3L0003029     | 0.02362  | 0.148118 | 2.078042 | down | noncoding | DB090998                   | lincRNA-GPHN-3    | chr14 | + |
| ASHG19A3L0003458     | 0.02043  | 0.139376 | 4.208564 | down | noncoding | AA136769                   | lincRNA-INSIG2-2  | chr2  | - |
| ASHG19A3L0003479     | 0.005173 | 0.07456  | 2.407279 | down | noncoding | AL599814                   | lincRNA-ITGA6-1   | chr2  | + |
| ASHG19A3L0003534     | 0.044515 | 0.198661 | 2.127515 | down | noncoding | AA368654                   | lincRNA-OPTC      | chr1  | - |
| CUST_124_PI426075208 | 0.040598 | 0.189891 | 2.897282 | down | noncoding | nc-HOXC4-153+              | nc-HOXC4-153      | chr12 | - |
| CUST_210_PI426075208 | 0.006002 | 0.079639 | 2.03916  | down | noncoding | nc-HOXD10-15+              | nc-HOXD10-15      | chr2  | - |
| CUST_424_PI426073487 | 0.013289 | 0.11573  | 2.939458 | down | noncoding | uc.426+                    | uc.426            | chr18 | + |
| CUST_761_PI426073487 | 0.032292 | 0.171321 | 2.607432 | down | noncoding | uc.282-                    | uc.282            | chr9  | - |

|                      |          |          |          |      |           |         |        |      |   |
|----------------------|----------|----------|----------|------|-----------|---------|--------|------|---|
| CUST_761_PI426073487 | 0.032292 | 0.171321 | 2.607432 | down | noncoding | uc.282- | uc.282 | chr9 | - |
| CUST_761_PI426073487 | 0.032292 | 0.171321 | 2.607432 | down | noncoding | uc.282- | uc.282 | chr9 | - |
| CUST_761_PI426073487 | 0.032292 | 0.171321 | 2.607432 | down | noncoding | uc.282- | uc.282 | chr9 | - |
| CUST_761_PI426073487 | 0.032292 | 0.171321 | 2.607432 | down | noncoding | uc.282- | uc.282 | chr9 | - |

**Supplementary Table 4. The list of genes dysregulated by siMYC or siMYCLo in HCT116.**

**Supplementary Table 4-1. The list of genes dysregulated by siMYC in HCT116**

\*Filtering criteria: more than 1.5 fold change, p-value<0.05

| probe set | siCTRL | siMYC  | fold change | lower bound of FC | upper bound of FC | t statistic | P value | paired t statistic | paired P value |
|-----------|--------|--------|-------------|-------------------|-------------------|-------------|---------|--------------------|----------------|
| MYC       | 1262.7 | 537.93 | -2.35       | -2.13             | -2.61             | -19.61      | 0.0002  | -35.97             | 0.0008         |
| CDC7      | 161.81 | 92.12  | -1.76       | -1.67             | -1.85             | -14.53      | 0.0024  | -19.04             | 0.0027         |
| POLR1D    | 1019.3 | 599.49 | -1.7        | -1.62             | -1.78             | -15.82      | 0.0014  | -24.01             | 0.0017         |
| BUB1B     | 430.26 | 270.56 | -1.59       | -1.49             | -1.7              | -12.78      | 0.0004  | -47.58             | 0.0004         |
| ATR       | 139.09 | 88.75  | -1.57       | -1.47             | -1.67             | -13.14      | 0.0005  | -12.38             | 0.0065         |
| ORC5      | 78.39  | 50.52  | -1.55       | -1.47             | -1.63             | -11.91      | 0.0038  | -9.732             | 0.0104         |
| PIK3R1    | 118.28 | 177.71 | 1.5         | 1.35              | 1.68              | 6.52        | 0.0029  | 5.376              | 0.0329         |
| GSK3B     | 518.49 | 781.13 | 1.51        | 1.38              | 1.65              | 7.642       | 0.0017  | 5.474              | 0.0318         |
| HDAC8     | 61.52  | 93.26  | 1.52        | 1.26              | 1.9               | 4.123       | 0.0424  | 4.572              | 0.0447         |
| E2F1      | 99.05  | 157.67 | 1.59        | 1.38              | 1.83              | 5.193       | 0.0113  | 5.38               | 0.0329         |
| TGFB1     | 72.2   | 115.79 | 1.6         | 1.45              | 1.78              | 7.327       | 0.0034  | 8.392              | 0.0139         |
| CFL1      | 2875   | 4642   | 1.61        | 1.52              | 1.71              | 14.857      | 0.0002  | 17.648             | 0.0032         |
| CREB3     | 59.43  | 96.16  | 1.62        | 1.41              | 1.85              | 5.087       | 0.021   | 4.805              | 0.0407         |
| YWHAB     | 83.11  | 136.81 | 1.65        | 1.48              | 1.81              | 6.452       | 0.0223  | 6.436              | 0.0233         |
| SMAD3     | 437.88 | 762.72 | 1.74        | 1.52              | 2.02              | 6.97        | 0.0023  | 5.83               | 0.0282         |
| ANAPC2    | 45.06  | 78.65  | 1.75        | 1.5               | 2.05              | 6.099       | 0.0039  | 5.225              | 0.0347         |
| CDC25B    | 284.59 | 497.72 | 1.75        | 1.57              | 1.94              | 7.175       | 0.0118  | 6.622              | 0.0221         |
| ARF3      | 590.73 | 1086.7 | 1.84        | 1.65              | 2.04              | 8.305       | 0.006   | 6.402              | 0.0235         |
| RELA      | 64.35  | 118.49 | 1.84        | 1.65              | 2.06              | 9.173       | 0.0012  | 36.102             | 0.0008         |
| CCNG2     | 101.8  | 189.26 | 1.86        | 1.6               | 2.13              | 5.897       | 0.0178  | 5.482              | 0.0317         |
| MAD1L1    | 70.12  | 131.07 | 1.87        | 1.77              | 1.98              | 21.405      | 4E-05   | 16.226             | 0.0038         |
| CDKN1C    | 85.05  | 160.53 | 1.89        | 1.48              | 2.49              | 4.37        | 0.0123  | 4.341              | 0.0492         |
| HDAC4     | 50.87  | 97.61  | 1.92        | 1.62              | 2.25              | 5.678       | 0.0153  | 5.964              | 0.027          |
| CDKN2D    | 59.2   | 117.55 | 1.99        | 1.77              | 2.26              | 12.406      | 0.002   | 10.944             | 0.0082         |
| JUN       | 39.21  | 78.35  | 2           | 1.5               | 2.97              | 4.915       | 0.0316  | 6.548              | 0.0225         |

|         |        |        |      |      |      |        |        |        |        |
|---------|--------|--------|------|------|------|--------|--------|--------|--------|
| CCND1   | 990.69 | 2007.5 | 2.03 | 1.88 | 2.18 | 14.412 | 0.0007 | 10.775 | 0.0085 |
| CDKN1A  | 257.29 | 535.87 | 2.08 | 1.91 | 2.29 | 17.429 | 0.0003 | 12.911 | 0.0059 |
| SFN     | 467.92 | 971.07 | 2.08 | 1.92 | 2.26 | 19.943 | 0.0004 | 22.525 | 0.002  |
| CDKN2B  | 41.52  | 89.38  | 2.15 | 1.86 | 2.53 | 10.129 | 0.0006 | 138.03 | 5E-05  |
| CCNE2   | 115.59 | 263.69 | 2.28 | 2.06 | 2.53 | 12.209 | 0.0012 | 13.302 | 0.0056 |
| CDH1    | 118.65 | 272.58 | 2.3  | 1.87 | 2.8  | 5.748  | 0.016  | 5.591  | 0.0305 |
| DTX4    | 9.67   | 22.35  | 2.31 | 1.76 | 2.96 | 4.187  | 0.0403 | 6.074  | 0.0261 |
| CREB3L3 | 4.47   | 10.92  | 2.45 | 1.78 | 3.55 | 4.63   | 0.0134 | 11.152 | 0.0079 |

\$ 33 genes satisfied the comparison filtering criteria

#### Supplementary Table 4-2. The list of genes dysregulated by siMYCLo-1 in HCT116

\*Filtering criteria: more than 1.5 fold change, p-value<0.05

| probe set | siMYCLo-1 | siCTRL | fold change | lower bound of FC | upper bound of FC | t statistic | P value | paired t statistic | paired P value |
|-----------|-----------|--------|-------------|-------------------|-------------------|-------------|---------|--------------------|----------------|
| CCNA2     | 489.21    | 773.78 | 1.58        | 1.28              | 2.05              | 4.064       | 0.04436 | 4.802              | 0.04074        |
| CDC14A    | 63.39     | 41.74  | -1.52       | -1.34             | -1.71             | -4.87       | 0.02348 | -6.466             | 0.02309        |
| MAD1L1    | 91.22     | 59.81  | -1.53       | -1.38             | -1.67             | -6.567      | 0.00994 | -10.576            | 0.00882        |
| POLR1C    | 309.48    | 201.44 | -1.54       | -1.4              | -1.68             | -6.533      | 0.01733 | -8.415             | 0.01383        |
| HDAC1     | 1353.12   | 872.43 | -1.55       | -1.47             | -1.63             | -12.81      | 0.00103 | -14.686            | 0.0046         |
| HDAC8     | 81.36     | 52.47  | -1.55       | -1.26             | -1.96             | -3.745      | 0.02448 | -9.447             | 0.01102        |
| ARF3      | 791.61    | 503.79 | -1.57       | -1.41             | -1.74             | -6.293      | 0.01011 | -12.386            | 0.00646        |
| CDC14B    | 134.34    | 85.57  | -1.57       | -1.43             | -1.73             | -7.933      | 0.00139 | -53.066            | 0.00036        |
| NEK1      | 47.92     | 30.48  | -1.57       | -1.32             | -1.9              | -4.561      | 0.011   | -4.561             | 0.04487        |
| RAD50     | 127.67    | 79.13  | -1.61       | -1.44             | -1.82             | -7.765      | 0.00194 | -10.553            | 0.00886        |
| ORC3      | 406.48    | 243.67 | -1.67       | -1.5              | -1.85             | -6.789      | 0.01312 | -6.868             | 0.02055        |
| ORC4      | 438.56    | 256.08 | -1.71       | -1.56             | -1.89             | -10.174     | 0.00053 | -16.218            | 0.00378        |
| ABL1      | 147.38    | 83.68  | -1.76       | -1.46             | -2.16             | -4.912      | 0.00915 | -5.395             | 0.03268        |
| NFKBIA    | 468.85    | 263.93 | -1.78       | -1.53             | -2.05             | -5.605      | 0.01497 | -8.803             | 0.01266        |
| HDAC5     | 69.93     | 38.03  | -1.84       | -1.45             | -2.29             | -3.722      | 0.04543 | -5.374             | 0.03293        |
| CDKN2B    | 69.98     | 35.41  | -1.98       | -1.59             | -2.45             | -4.569      | 0.02428 | -4.765             | 0.04133        |

|        |                                                      |        |       |       |       |        |         |         |         |
|--------|------------------------------------------------------|--------|-------|-------|-------|--------|---------|---------|---------|
| DTX4   | 20.14                                                | 8.25   | -2.44 | -1.91 | -3.08 | -4.884 | 0.02789 | -6.13   | 0.02559 |
| CDH1   | 247.99                                               | 101.19 | -2.45 | -2.11 | -2.88 | -9.809 | 0.00132 | -22.829 | 0.00191 |
| CDKN1A | 623.31                                               | 219.43 | -2.84 | -2.47 | -3.26 | -9.572 | 0.00629 | -8.707  | 0.01293 |
| \$     | 19 genes satisfied the comparison filtering criteria |        |       |       |       |        |         |         |         |

**Supplementary Table 4-3. The list of genes dysregulated by siMYCLo-2 in HCT116**

\*Filtering criteria: more than 1.5 fold change, p-value<0.05

| probe set | siMYCLo-2 | siCTRL | fold change | lower bound of FC | upper bound of FC | t statistic | P value | paired t statistic | paired P value |
|-----------|-----------|--------|-------------|-------------------|-------------------|-------------|---------|--------------------|----------------|
| CREB3L4   | 7.68      | 16.35  | 2.13        | 1.88              | 2.45              | 11.512      | 0.0004  | 42.853             | 0.0005         |
| CCNG2     | 59.94     | 114.53 | 1.91        | 1.77              | 2.06              | 10.661      | 0.0068  | 9.118              | 0.0118         |
| YWHAZ     | 2647.7    | 4373.1 | 1.65        | 1.63              | 1.68              | 60.773      | 7E-06   | 50.912             | 0.0004         |
| PTTG1     | 1699.1    | 1130.4 | -1.5        | -1.3              | -1.72             | -4.053      | 0.0479  | -5.264             | 0.0342         |
| GADD45A   | 927.68    | 612.43 | -1.51       | -1.46             | -1.58             | -21.56      | 0.002   | -19.92             | 0.0025         |
| YWHAH     | 1001.4    | 661.74 | -1.51       | -1.31             | -1.75             | -4.573      | 0.0144  | -15.92             | 0.0039         |
| HDAC2     | 2655.3    | 1741.2 | -1.52       | -1.45             | -1.61             | -13.61      | 0.0002  | -15.49             | 0.0041         |
| CDC14B    | 172.9     | 112.88 | -1.53       | -1.28             | -1.8              | -3.658      | 0.0473  | -4.308             | 0.0499         |
| MRE11A    | 198.08    | 129.81 | -1.53       | -1.28             | -1.86             | -4.237      | 0.0169  | -13.18             | 0.0057         |
| E2F3      | 181.32    | 117.48 | -1.54       | -1.36             | -1.73             | -5.121      | 0.0251  | -7.457             | 0.0175         |
| MNAT1     | 495.42    | 322.66 | -1.54       | -1.38             | -1.72             | -7.763      | 0.0087  | -8.567             | 0.0134         |
| NFKBIA    | 537.04    | 348.17 | -1.54       | -1.4              | -1.71             | -7.689      | 0.0017  | -11.15             | 0.008          |
| ARF1      | 2787.9    | 1792.1 | -1.56       | -1.45             | -1.66             | -10.04      | 0.0018  | -21.25             | 0.0022         |
| SFN       | 829.29    | 526.44 | -1.58       | -1.4              | -1.77             | -6.127      | 0.0067  | -11.2              | 0.0079         |
| CFL1      | 5175.3    | 3234.6 | -1.6        | -1.48             | -1.73             | -9.522      | 0.0018  | -23.68             | 0.0018         |
| MDM2      | 805.53    | 496.95 | -1.62       | -1.54             | -1.71             | -14.31      | 0.0004  | -24.58             | 0.0017         |
| ORC6      | 519.48    | 317.63 | -1.64       | -1.5              | -1.8              | -11.07      | 0.0039  | -17.4              | 0.0033         |
| MAPK8     | 441.07    | 265.22 | -1.66       | -1.54             | -1.78             | -9.514      | 0.0073  | -9.503             | 0.0109         |
| ANAPC10   | 376.39    | 220.7  | -1.71       | -1.57             | -1.85             | -9.967      | 0.0015  | -25.96             | 0.0015         |
| ANAPC11   | 59.54     | 34.7   | -1.72       | -1.64             | -1.79             | -19.17      | 0.0003  | -40.77             | 0.0006         |
| ATR       | 270.89    | 156.49 | -1.73       | -1.56             | -1.91             | -7.04       | 0.0176  | -6.597             | 0.0222         |
| CDC14A    | 95.26     | 55.06  | -1.73       | -1.62             | -1.86             | -14.41      | 0.0001  | -154.5             | 4E-05          |

|         |        |        |       |       |       |        |        |        |        |
|---------|--------|--------|-------|-------|-------|--------|--------|--------|--------|
| CREBBP  | 84.45  | 48.82  | -1.73 | -1.35 | -2.21 | -3.384 | 0.0424 | -5.622 | 0.0302 |
| RAD51   | 207.18 | 119.92 | -1.73 | -1.37 | -2.3  | -4.402 | 0.0219 | -5.591 | 0.0305 |
| SMAD2   | 387.14 | 222.73 | -1.74 | -1.56 | -1.93 | -8.14  | 0.003  | -12.18 | 0.0067 |
| ORC4    | 590.25 | 337.82 | -1.75 | -1.52 | -1.99 | -6.059 | 0.0118 | -7.698 | 0.0165 |
| E2F5    | 265.94 | 150.62 | -1.77 | -1.43 | -2.13 | -3.962 | 0.0434 | -6.003 | 0.0266 |
| TFDP2   | 340.22 | 189.78 | -1.79 | -1.56 | -2.09 | -8.017 | 0.0021 | -17    | 0.0034 |
| FBXW7   | 172.98 | 95.76  | -1.81 | -1.51 | -2.11 | -4.656 | 0.0368 | -5.905 | 0.0275 |
| YWHAQ   | 2984.2 | 1651.3 | -1.81 | -1.65 | -1.98 | -8.829 | 0.0071 | -13.22 | 0.0057 |
| DBF4    | 521.91 | 281.81 | -1.85 | -1.73 | -1.98 | -13.7  | 0.0013 | -14.12 | 0.005  |
| SKP2    | 401.75 | 217.35 | -1.85 | -1.71 | -2.01 | -15.56 | 0.0002 | -11.21 | 0.0079 |
| YWHAB   | 177.76 | 93.5   | -1.9  | -1.79 | -2.01 | -14.25 | 0.0042 | -15.25 | 0.0043 |
| NACA    | 59.67  | 30.99  | -1.93 | -1.64 | -2.22 | -5.465 | 0.0285 | -4.789 | 0.0409 |
| HDAC8   | 134.31 | 69.21  | -1.94 | -1.55 | -2.49 | -4.906 | 0.0089 | -10.58 | 0.0088 |
| EP300   | 292.79 | 147.59 | -1.98 | -1.66 | -2.37 | -5.55  | 0.015  | -7.85  | 0.0158 |
| CDKN1A  | 598.7  | 289.47 | -2.07 | -1.84 | -2.33 | -9.425 | 0.0023 | -19.81 | 0.0025 |
| GADD45B | 85.04  | 39.76  | -2.14 | -1.78 | -2.57 | -5.94  | 0.0129 | -11    | 0.0082 |
| SKP1    | 75.13  | 34.11  | -2.2  | -1.84 | -2.68 | -7.591 | 0.002  | -28.99 | 0.0012 |
| CDK6    | 230.44 | 103.16 | -2.23 | -2.07 | -2.42 | -17.55 | 0.0002 | -28.72 | 0.0012 |
| E2F1    | 251.44 | 111.44 | -2.26 | -1.95 | -2.61 | -7.769 | 0.0074 | -12.73 | 0.0061 |
| TGFB1   | 190.08 | 81.23  | -2.34 | -2.04 | -2.66 | -8.309 | 0.0089 | -10.31 | 0.0093 |
| CDC25A  | 207.34 | 87.31  | -2.37 | -2.19 | -2.58 | -17.39 | 0.0002 | -17.51 | 0.0032 |
| CCNE1   | 424.24 | 173.01 | -2.45 | -2.29 | -2.63 | -18.99 | 0.0006 | -32.2  | 0.001  |
| CDKN2B  | 121.69 | 46.71  | -2.61 | -2.28 | -3.03 | -17.02 | 0.0005 | -13.49 | 0.0055 |
| POLR1A  | 20.72  | 7.9    | -2.62 | -1.74 | -4.76 | -4.215 | 0.0136 | -5.3   | 0.0338 |
| CCND3   | 90.91  | 32.49  | -2.8  | -2.28 | -3.47 | -7.425 | 0.0067 | -10.9  | 0.0083 |
| CCNE2   | 420.01 | 130.04 | -3.23 | -2.99 | -3.51 | -37.08 | 6E-06  | -26.49 | 0.0014 |
| DHFR    | 111.54 | 30.28  | -3.68 | -3.02 | -4.54 | -9.29  | 0.0052 | -7.36  | 0.018  |

\$ 49 genes satisfied the comparison filtering criteria

**Supplementary Table 4-4. The list of genes dysregulated by siMYCLO-3 in HCT116**

\*Filtering criteria: more than 1.5 fold change, p-value<0.05

| probe set | siMYCLO-3                                            | siCTRL | fold change | lower bound of FC | upper bound of FC | t statistic | P value | paired t statistic | paired P value |  |
|-----------|------------------------------------------------------|--------|-------------|-------------------|-------------------|-------------|---------|--------------------|----------------|--|
| PIK3R1    | 39.1                                                 | 120.77 | 3.09        | 2.66              | 3.61              | 11.461      | 0.002   | 8.705              | 0.0129         |  |
| CDKN1A    | 85.75                                                | 262.71 | 3.06        | 2.48              | 3.93              | 9.873       | 0.0008  | 11.584             | 0.0074         |  |
| CREB3L4   | 5.39                                                 | 14.84  | 2.75        | 1.93              | 4.74              | 6.556       | 0.0135  | 7.038              | 0.0196         |  |
| YWHAE     | 1112.8                                               | 2503.4 | 2.25        | 2.13              | 2.38              | 19.456      | 0.001   | 23.725             | 0.0018         |  |
| MCM4      | 536.87                                               | 1188.6 | 2.21        | 2.08              | 2.35              | 18.946      | 0.0005  | 25.102             | 0.0016         |  |
| RAD50     | 43.81                                                | 94.73  | 2.16        | 1.61              | 3.19              | 4.96        | 0.01    | 9.57               | 0.0107         |  |
| CDC7      | 83.08                                                | 165.21 | 1.99        | 1.73              | 2.32              | 9.806       | 0.0011  | 10.189             | 0.0095         |  |
| MNAT1     | 148.85                                               | 292.84 | 1.97        | 1.6               | 2.49              | 5.572       | 0.0052  | 4.73               | 0.0419         |  |
| ARF3      | 320.59                                               | 603.18 | 1.88        | 1.75              | 2.02              | 11.871      | 0.0031  | 16.841             | 0.0035         |  |
| TBC1D8    | 85.64                                                | 133.9  | 1.56        | 1.41              | 1.74              | 6.769       | 0.0039  | 4.887              | 0.0394         |  |
| CDC25B    | 437.32                                               | 290.59 | -1.5        | -1.4              | -1.61             | -9.2        | 0.0015  | -28.62             | 0.0012         |  |
| E2F5      | 210.93                                               | 136.7  | -1.54       | -1.4              | -1.71             | -8.635      | 0.0043  | -8.568             | 0.0133         |  |
| DHFR      | 58.9                                                 | 27.48  | -2.14       | -1.82             | -2.58             | -8.826      | 0.001   | -8.588             | 0.0133         |  |
| \$        | 13 genes satisfied the comparison filtering criteria |        |             |                   |                   |             |         |                    |                |  |

**Supplementary Table 5. List of primers used for RACE, PCR, Sequencing and Cloning.**

| <b>Target<br/>LncRNA or<br/>Region</b> | <b>Name &amp; Description</b> | <b>Usage</b>                  | <b>Sequence</b>                 |
|----------------------------------------|-------------------------------|-------------------------------|---------------------------------|
| MYCLo-1<br>(AK021907)                  | MYCLo-1 5 RACE                | 5'RACE                        | GCATTCTGACTTCTTGCTTGAAAACCCCTGG |
| MYCLo-1<br>(AK021907)                  | MYCLo-1 5 NESTED              | 5' nested PCR &<br>Sequencing | TTAGTGGATAAGCACCTGTAACTCCAGGA   |
| MYCLo-1<br>(AK021907)                  | MYCLo-1 INTERNAL-<br>Forward  | Internal-F & Sequencing       | TTATTTTAACCGTCGTGAATACATCAAAAT  |
| MYCLo-1<br>(AK021907)                  | MYCLo-1 INTERNAL-<br>Reverse  | Internal-R & Sequencing       | TGGATTATAGCCCACCCAATCCTATTTT    |
| MYCLo-1<br>(AK021907)                  | MYCLo-1 3 RACE                | 3'RACE                        | CCAGGGGTTTTCAAGCAAGAAGTCAGAATGC |
| MYCLo-1<br>(AK021907)                  | MYCLo-1 3 NESTED              | 3' nested PCR &<br>Sequencing | AAATAGGATTGGGTGGGCTATAATCCA     |
| MYCLo-2<br>(AC074389.9)                | MYCLo-2 5 RACE                | 5'RACE                        | TGCTCTTGCAAGTGGCAGGAGGAGCTCCA   |
| MYCLo-2<br>(AC074389.9)                | MYCLo-2 5 NESTED              | 5' nested PCR &<br>Sequencing | CTCCAACATGAATTAAGTAAATAACCAAG   |
| MYCLo-2<br>(AC074389.9)                | MYCLo-2 INTERNAL-<br>Forward  | Internal-F & Sequencing       | AATTCCTCTCAGCCCCACCTAGTTTAAA    |
| MYCLo-2<br>(AC074389.9)                | MYCLo-2 INTERNAL-<br>Reverse  | Internal-R & Sequencing       | AAGAGGAAGCAGAGCCAGCGCAT         |
| MYCLo-2<br>(AC074389.9)                | MYCLo-2 3 RACE                | 3'RACE                        | TGGAGCTCCTCTGCCACTGCAAGAGCA     |
| MYCLo-2<br>(AC074389.9)                | MYCLo-2 3 NESTED              | 3' nested PCR &<br>Sequencing | AAGAGCAGGAGCTGTGTGCCTG          |
| MYCLo-3<br>(KTN-AS1)                   | MYCLo-3 5 RACE                | 5'RACE                        | GGGAGGTCTACAGATCCCACCTTTACGC    |
| MYCLo-3<br>(KTN-AS1)                   | MYCLo-3 5 NESTED              | 5' nested PCR &<br>Sequencing | TGGCAGATAATTTTCAGTCATCTTTAATCT  |
| MYCLo-3<br>(KTN-AS1)                   | MYCLo-3 INTERNAL-<br>Forward  | Internal-F & Sequencing       | TCTGCACTGTGCTCTTTTGACCTGT       |
| MYCLo-3<br>(KTN-AS1)                   | MYCLo-3 INTERNAL-<br>Reverse  | Internal-R & Sequencing       | TCTCTGTCCTCATTTAATCCATTAATTTCC  |
| MYCLo-3                                | MYCLo-3 3 RACE                | 3'RACE                        | CTCAAGACATCCCTGGAGCCTTTCAAGG    |



|                        |                                           |                                                      |                                               |
|------------------------|-------------------------------------------|------------------------------------------------------|-----------------------------------------------|
| (KTN-AS1)              |                                           |                                                      |                                               |
| MYCLO-3<br>(KTN-AS1)   | MYCLO-3 3 NESTED                          | 3' nested PCR &<br>Sequencing                        | AAATTTGGGCAGAAGTAGGTAGAGAGGTA                 |
| MYCLO-1 5'<br>promoter | MYCLO-1 5' promoter-<br>Forward           | Amplification of 5'<br>promoter region of<br>MYCLO-1 | GGGAGGCTTATTTCTAATTGCTAGA                     |
| MYCLO-1 5'<br>promoter | MYCLO-1 5' promoter-<br>Reverse           | Amplification of 5'<br>promoter region of<br>MYCLO-1 | TGCAGTTTATAGCTATACATTATTTTTAAAAATCCC          |
| MYCLO-1 5'<br>promoter | MYCLO-1 5' promoter-<br>Forward w/ Xho1   | Insert into pGL4 w/<br>Xho1 digestion                | CCGCTCGAGGGGAGGCTTATTTCTAATTGCTAGA            |
| MYCLO-1 5'<br>promoter | MYCLO-1 5' promoter-<br>Reverse w/ Xho1   | Insert into pGL4 w/<br>Xho1 digestion                | CCGCTCGAGTGCAGTTTATAGCTATACATTATTTTTAAAAATCCC |
| MYCLO-2 5'<br>promoter | MYCLO-2 5' promoter-<br>Forward           | Amplification of 5'<br>promoter region of<br>MYCLO-2 | GATAGAGAAATGGGTGTGTTTGCTT                     |
| MYCLO-2 5'<br>promoter | MYCLO-2 5' promoter-<br>Reverse           | Amplification of 5'<br>promoter region of<br>MYCLO-2 | TGTTTCCTGCATGCATGCAACAT                       |
| MYCLO-2 5'<br>promoter | MYCLO-2 5' promoter-<br>Forward w/ Xho1   | Insert into pGL4 w/<br>Xho1 digestion                | CCGCTCGAGGATAGAGAAATGGGTGTGTTTGCTT            |
| MYCLO-2 5'<br>promoter | MYCLO-2 5' promoter-<br>Reverse w/ Xho1   | Insert into pGL4<br>w/Hind3 digestion                | CCCAAGCTTTGTTTCCTGCATGCATGCAACAT              |
| MYCLO-3 5'<br>promoter | MYCLO-3 5' promoter-<br>Forward           | Amplification of 5'<br>promoter region of<br>MYCLO-3 | CTGAAGGGGTCAGGCCGAAT                          |
| MYCLO-3 5'<br>promoter | MYCLO-3 5' promoter-<br>Reverse           | Amplification of 5'<br>promoter region of<br>MYCLO-3 | TTGCGGACAGCTTGGAGTGT                          |
| MYCLO-3 5'<br>promoter | MYCLO-3 5' promoter-<br>Forward w/ Xho1   | Insert into pGL4 w/<br>Xho1 digestion                | CCGCTCGAGCTGAAGGGGTCAGGCCGAAT                 |
| MYCLO-3 5'<br>promoter | MYCLO-3 5' promoter-<br>Reverse w/ Xho1   | Insert into pGL4 w/<br>Xho1 digestion                | CCGCTCGAGTTGCGGACAGCTTGGAGTGT                 |
| CDKN1A 5'<br>promoter  | CDKN1A 5' promoter<br>(726bp) -Forward    | Insert into pGL4 w/<br>Hind3 digestion               | CACACAAGCTTATAGAGGTGATATTGTGGGGCTTTTCT        |
| CDKN1A 5'<br>promoter  | CDKN1A 5' promoter<br>(726bp) -Reverse    | Insert into pGL4 w/<br>Hind3 digestion               | CACACAAGCTTCAGAAACACCTGTGAACGCAGCA            |
| CDKN1A 5'<br>promoter  | CDKN1A 5' promoter<br>(1.8kb) -Forward w/ | Insert into pGL4 w/<br>Nhe1 digestion                | CTAGCTAGCTCAGTTTGCCCATTAATATTATAGGTCT         |

## Nhe1

|                    |                                             |                                     |                                         |
|--------------------|---------------------------------------------|-------------------------------------|-----------------------------------------|
| CDKN1A 5' promoter | CDKN1A 5' promoter (1.8kb) -Reverse w/ Xho1 | Insert into pGL4 w/ Xho1 digestion  | CCGCTCGAGACAAAATAGCCACCAGCCTCTTCTA      |
| CDKN2B 5' promoter | CDKN2B 5' promoter (455bp) -Forward         | Insert into pGL4 w/ Hind3 digestion | CACACAAGCTTGGTCTCCTAGGAAGGAGAGAGT       |
| CDKN2B 5' promoter | CDKN2B 5' promoter (455bp) -Reverse         | Insert into pGL4 w/ Hind3 digestion | CACACAAGCTTCAATGTCTCTCTTTAGGATTTTTGCTGG |
| CDKN2B 5' promoter | CDKN2B 5' promoter (2kb) -Forward w/ Xho1   | Insert into pGL4 w/ Xho1 digestion  | CCGCTCGAGTTGTCTGTAAAATTGAAATATGGACACATG |
| CDKN2B 5' promoter | CDKN2B 5' promoter (2kb) -Reverse w/ Xho1   | Insert into pGL4 w/ Xho1 digestion  | CCGCTCGAGATGTCCAGTAAAGCCAAGGCTAATATT    |
| CDKN1A 5' promoter | CDKN1A 5' promoter ChIP-1 Forward           | ChIP assay of CDKN1A 5' promoter    | AAAGTGCTGGGATTACAGGCGTAA                |
| CDKN1A 5' promoter | CDKN1A 5' promoter ChIP-1 Reverse           | ChIP assay of CDKN1A 5' promoter    | TTAGTAATTTTCAGTTTGCTCATGTTTCCTA         |
| CDKN1A 5' promoter | CDKN1A 5' promoter ChIP-2 Forward           | ChIP assay of CDKN1A 5' promoter    | GTA CTTCAGATTTGTGATGCTAGGAA             |
| CDKN1A 5' promoter | CDKN1A 5' promoter ChIP-2 Reverse           | ChIP assay of CDKN1A 5' promoter    | CACCATGCCAGCTAATATTTGTATTT              |
| CDKN1A 5' promoter | CDKN1A 5' promoter ChIP-3 Forward           | ChIP assay of CDKN1A 5' promoter    | TGAGGCAGAATTGCTTGAACCTG                 |
| CDKN1A 5' promoter | CDKN1A 5' promoter ChIP-3 Reverse           | ChIP assay of CDKN1A 5' promoter    | CAGCCCTGGCTTTTTGTTTTTCATTT              |
| CDKN1A 5' promoter | CDKN1A 5' promoter ChIP-4 Forward           | ChIP assay of CDKN1A 5' promoter    | TGCCACTGCTGACTTTGTCTCAA                 |
| CDKN1A 5' promoter | CDKN1A 5' promoter ChIP-4 Reverse           | ChIP assay of CDKN1A 5' promoter    | AAGAAGTGAGACCCCAGAGAAGA                 |
| CDKN1A 5' promoter | CDKN1A 5' promoter ChIP-5 Forward           | ChIP assay of CDKN1A 5' promoter    | AATAATGTTCTATCTTTGTTCCGCCTCT            |
| CDKN1A 5' promoter | CDKN1A 5' promoter ChIP-5 Reverse           | ChIP assay of CDKN1A 5' promoter    | AAAGAGACTGGGGAGTCCCAAATA                |
| CDKN1A 5' promoter | CDKN1A 5' promoter ChIP-6 Forward           | ChIP assay of CDKN1A 5' promoter    | TGTGTGAAGGTGAATTCCTCTGAAA               |
| CDKN1A 5' promoter | CDKN1A 5' promoter ChIP-6 Reverse           | ChIP assay of CDKN1A 5' promoter    | TAGGAAGGGAGAGGAAGTGCT                   |
| CDKN1A 5' promoter | CDKN1A 5' promoter ChIP-7 Forward           | ChIP assay of CDKN1A 5' promoter    | TTGGGCTTTCCACCTTTCACCATT                |

|                       |                                      |                                     |                                     |
|-----------------------|--------------------------------------|-------------------------------------|-------------------------------------|
| CDKN1A 5'<br>promoter | CDKN1A 5' promoter<br>ChIP-7 Reverse | ChIP assay of CDKN1A<br>5' promoter | AAGCATGTTCTCCTGGGAAGCAG             |
| CDKN1A 5'<br>promoter | CDKN1A 5' promoter<br>ChIP-8 Forward | ChIP assay of CDKN1A<br>5' promoter | AACATGTCCCAACATGTTGAGCT             |
| CDKN1A 5'<br>promoter | CDKN1A 5' promoter<br>ChIP-8 Reverse | ChIP assay of CDKN1A<br>5' promoter | TTTAGAGGTCTCCTGTCTCCTA              |
| CDKN2B 5'<br>promoter | CDKN2B 5' promoter<br>ChIP-1 Forward | ChIP assay of CDKN2B<br>5' promoter | ATAAAAATAAGATACCTGACAAAGTGGGT       |
| CDKN2B 5'<br>promoter | CDKN2B 5' promoter<br>ChIP-1 Reverse | ChIP assay of CDKN2B<br>5' promoter | TTATACTTTAAGAATCTGAGATCCCAGTTT      |
| CDKN2B 5'<br>promoter | CDKN2B 5' promoter<br>ChIP-2 Forward | ChIP assay of CDKN2B<br>5' promoter | CAAAGATTTACTGTACAAATATGATGAAACTG    |
| CDKN2B 5'<br>promoter | CDKN2B 5' promoter<br>ChIP-2 Reverse | ChIP assay of CDKN2B<br>5' promoter | AAAAGTAGTTCGAGATTGAGAGTGG           |
| CDKN2B 5'<br>promoter | CDKN2B 5' promoter<br>ChIP-3 Forward | ChIP assay of CDKN2B<br>5' promoter | TTTTGTCTTATGTGTGCCAGGTTG            |
| CDKN2B 5'<br>promoter | CDKN2B 5' promoter<br>ChIP-3 Reverse | ChIP assay of CDKN2B<br>5' promoter | GAATCATGTTTTGCGTGTGCTTTTTAATTC      |
| CDKN2B 5'<br>promoter | CDKN2B 5' promoter<br>ChIP-4 Forward | ChIP assay of CDKN2B<br>5' promoter | TTCTCTTTTAAGGGTTGTATCCATAATGCA      |
| CDKN2B 5'<br>promoter | CDKN2B 5' promoter<br>ChIP-4 Reverse | ChIP assay of CDKN2B<br>5' promoter | TGTCTTTCTGTTTGAATTAGTCAACCATAAAAAAT |
| CDKN2B 5'<br>promoter | CDKN2B 5' promoter<br>ChIP-5 Forward | ChIP assay of CDKN2B<br>5' promoter | AAACAGAAAGACACATCCAAGAGAAAATTG      |
| CDKN2B 5'<br>promoter | CDKN2B 5' promoter<br>ChIP-5 Reverse | ChIP assay of CDKN2B<br>5' promoter | TCTGCACCTGTCATACAAGTTAAATTCAT       |
| CDKN2B 5'<br>promoter | CDKN2B 5' promoter<br>ChIP-6 Forward | ChIP assay of CDKN2B<br>5' promoter | TTATGAAACTTGTGAAGCCCAAGTACT         |
| CDKN2B 5'<br>promoter | CDKN2B 5' promoter<br>ChIP-6 Reverse | ChIP assay of CDKN2B<br>5' promoter | AGTCATTCAAATAACTCCGTGTTTCTTAAG      |

**Supplementary Table 6. Information of custom and prebuilt siRNAs.**

| <b>Name</b>    | <b>Target LncRNA or mRNA</b> | <b>sequence</b>     | <b>Information</b>                            |
|----------------|------------------------------|---------------------|-----------------------------------------------|
| siMYCLo-1 (-1) | MYCLo-1                      | CCUAAAUGUGGUUGGUA   | Dharmacon custom siRNA                        |
| siMYCLo-1 (-2) | MYCLo-1                      | UUGUUAAGCGAUUGAGUUA | Dharmacon custom siRNA                        |
| siMYCLo-2 (-1) | MYCLo-2                      | CCTTTAATCTCTTGCTCAA | Dharmacon custom siRNA                        |
| siMYCLo-2 (-2) | MYCLo-2                      | CCACAAUCGUAUACACCUU | Dharmacon custom siRNA                        |
| siMYCLo-3 (-1) | MYCLo-3                      | GUGUAAAUCUUCAGGUAUA | Dharmacon custom siRNA                        |
| siMYCLo-3 (-2) | MYCLo-3                      | ACAGAAAGGUGCUUCAUAA | Dharmacon custom siRNA                        |
| siMYC          | MYC (c-MYC mRNA)             | N/A                 | Dharmacon ON-TARGETplus SMARTpool - Human MYC |
| siMYC-2        | MYC (c-MYC mRNA)             | N/A                 | Santa Cruz Biotechnology - Human MYC          |
| siHuR          | HuR (ELAVL1)                 | N/A                 | Dharmacon ON-TARGETplus SMARTpool - Human MYC |
| siCTRL         | None                         | N/A                 | Dharmacon ON-TARGETplus Non-targeting Pool    |

**Supplementary Table 7. Probes for qRT-PCR (Taqman Assay).**

| <b>Target LncRNA or mRNA</b> | <b>Assay ID</b> |
|------------------------------|-----------------|
| MYCLo-1 (AK021907)           | Hs01008390_s1   |
| MYCLo-2 (AC074389.9)         | Hs00419350_m1   |
| MYCLo-3 (KTN-AS1)            | Hs00872315_m1   |
| MYC (c-MYC)                  | Hs00905030_m1   |
| CDKN1A (p21)                 | Hs00355782_m1   |
| CDKN2B (p15)                 | Hs00793225_m1   |
| HNRNPK                       | Hs03989611_gH   |
| ELAVL1 (HuR)                 | Hs00171309_m1   |
| YWHAB                        | Hs00793604_m1   |
| CFL1                         | Hs02621564_g1   |
| SFN                          | Hs00968567_s1   |

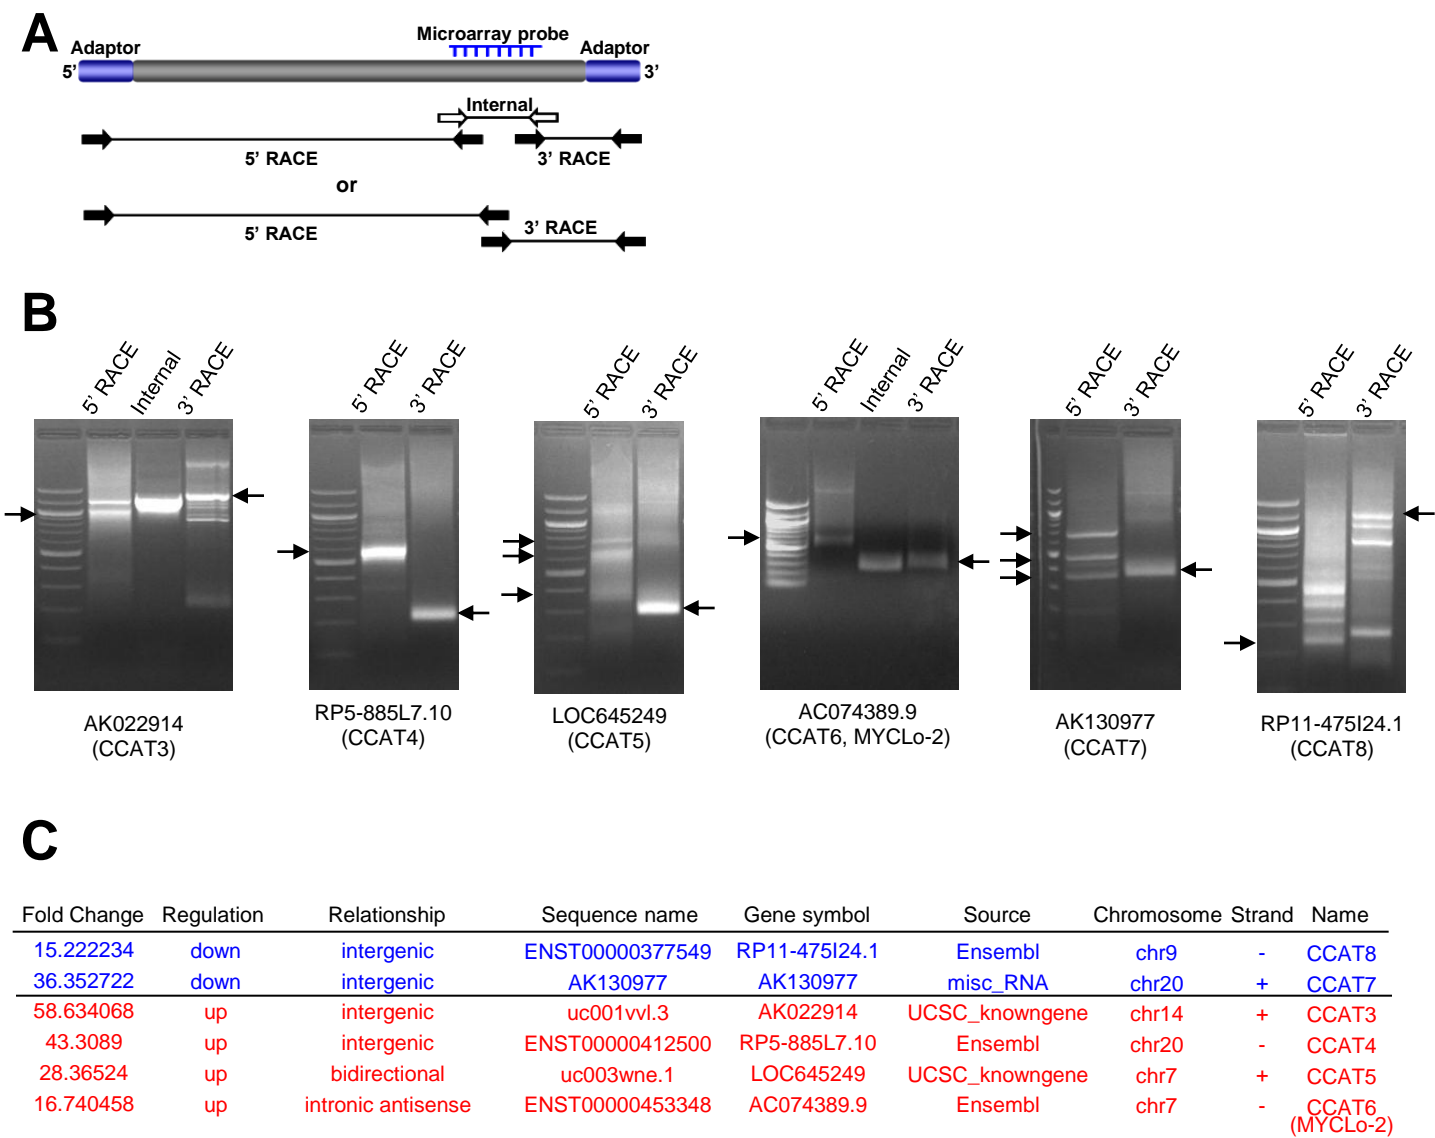

**Supplementary Figure 1 (related to Figure 1). Identification of lncRNAs differentially expressed in colorectal cancer (CRC).** A) Schematic view of the strategy of 5' and 3' RACE of lncRNAs. B) 5' (left lane) and 3' (right lane) RACE and amplification of internal region (middle lane) covering the both starting points of 5' and 3' RACE. Black arrows indicate appropriate 5' and 3' RACE products. The bands were confirmed by direct sequencing. C) Information of the identified Colorectal Cancer-Associated transcripts (CCATs).

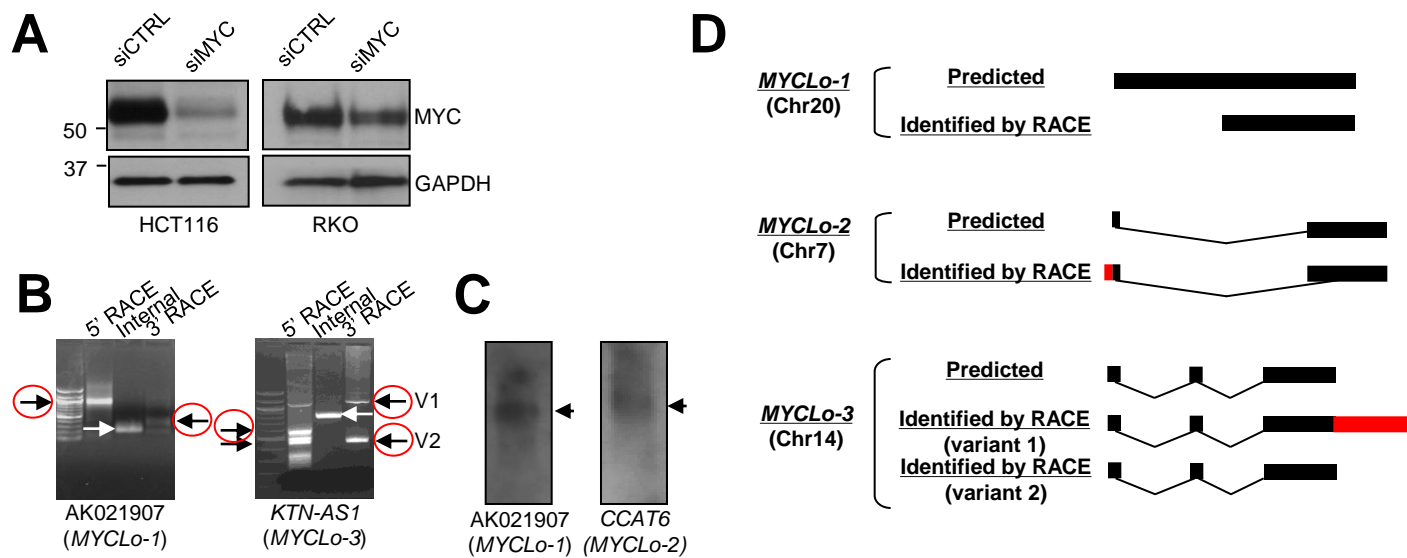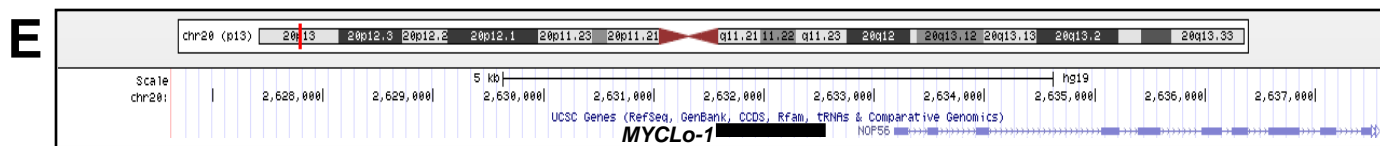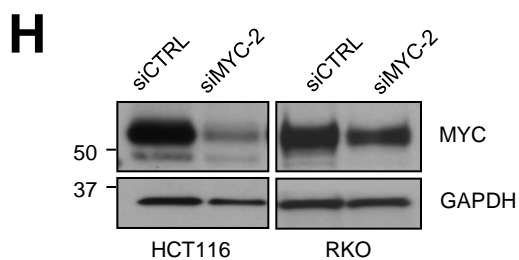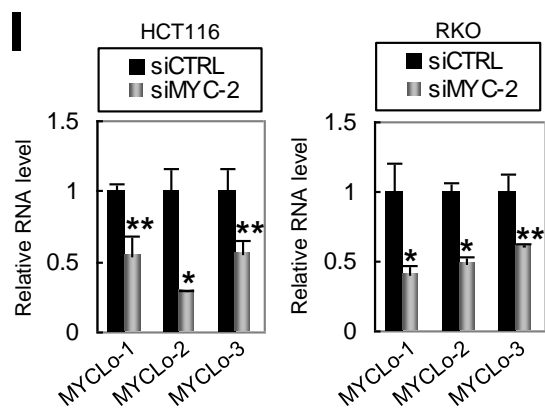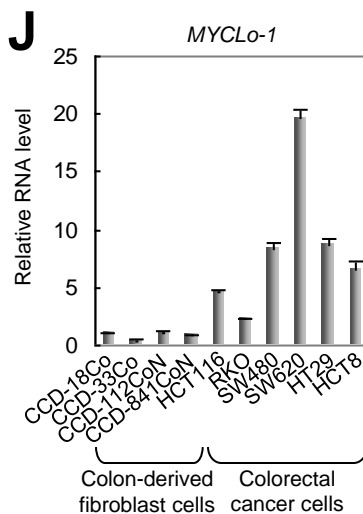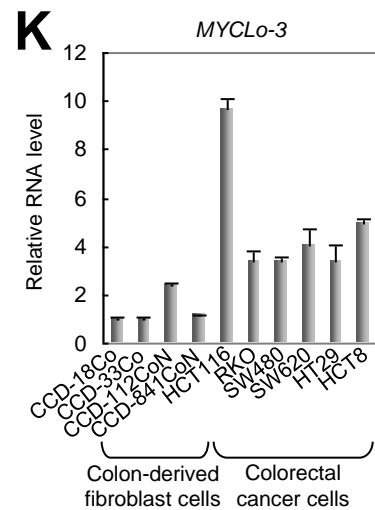

**Supplementary Figure 2 (related to Figure 2). Identification of MYC-regulated lncRNAs (MYCLOs) in colorectal cancer (CRC).** A) Western blot analysis showing MYC protein levels decreased by siRNA targeting MYC. B) 5' (left lane) and 3' (right lane) RACE and amplification of internal region (middle lane) covering the both starting points of 5' and 3' RACE. Black arrows indicate appropriate 5' and 3' RACE products and white arrows indicate products of internal PCR. The bands were confirmed by direct sequencing. C) Northern blot analysis of the MYC-regulated lncRNAs (MYCLOs). D) Schematic view of MYCLOs identified by 5' and 3' RACE. The regions in red indicate additional sequence identified by RACE. E-G) Genomic localization of MYCLOs, MYCLO-1 in chromosome 20 (E), MYCLO-2 in chromosome 7 (F), MYCLO-3 in chromosome 14 (G). H) Western blot showing knockdown effect of an additional siRNA targeting MYC (siMYC-2) in HCT116 (left) and RKO (right). I) Decreased RNA levels of MYCLO-1, -2 and -3 by siMYC-2 in HCT116 (left) and RKO (right). Data are mean  $\pm$  S.D. of three independent experiments and each measured in triplicate (\*\*,  $P < 0.05$ ; \*,  $P = < 0.01$ ). J and K) qRT-PCR results showing predominant expression levels of MYCLO-1 (J) and MYCLO-3 (K) in CRC-derived cell lines. Data are mean  $\pm$  S.D. of three independent experiments and each measured in triplicate.



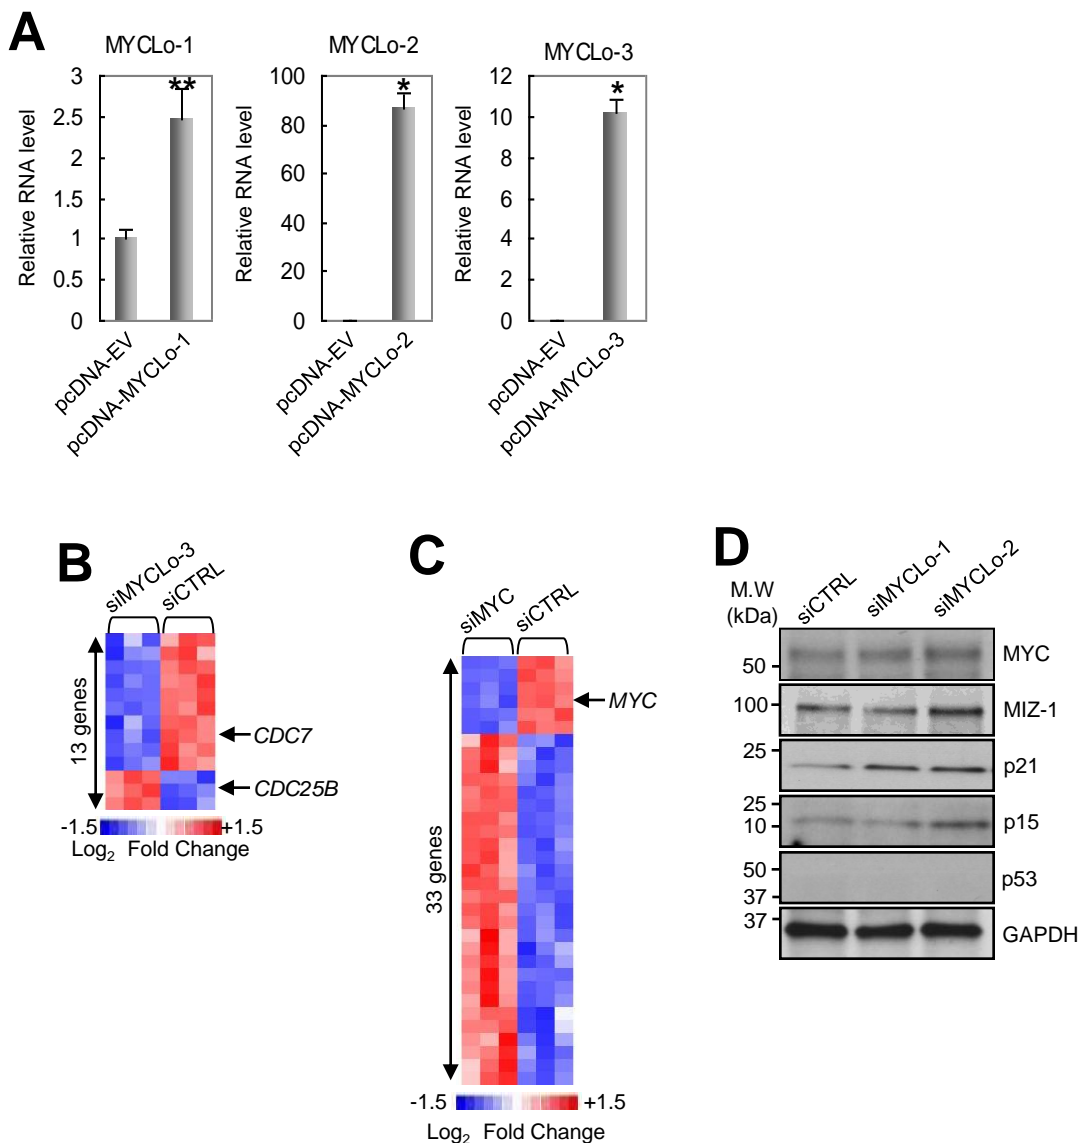

**Supplementary Figure 3 (related to Figure 3). *MYC* regulates expression of various cell cycle-related genes.** A) Confirmation of overexpression of MYCLO-1, -2, and -3 using expression vector. Data are mean  $\pm$  S.D. of three independent experiments and each measured in triplicate (\*\*,  $P < 0.05$ ; \*,  $P < 0.01$ ). B-C) Heatmaps representing cell cycle regulator genes dysregulated by MYCLO-3 (B) and MYC (C). The genes that are commonly regulated by MYC are indicated (B). Expression values displayed in gradient of red and blue are Log<sub>2</sub>-transformed fold change. The list of the dysregulated genes is available in SupplementaryTable 4. D) Western blot analysis to confirm MYCLO-mediated regulation of CDKN1A (p21) and CDKN2B (p15), independent of MYC, MIZ-1 and p53.

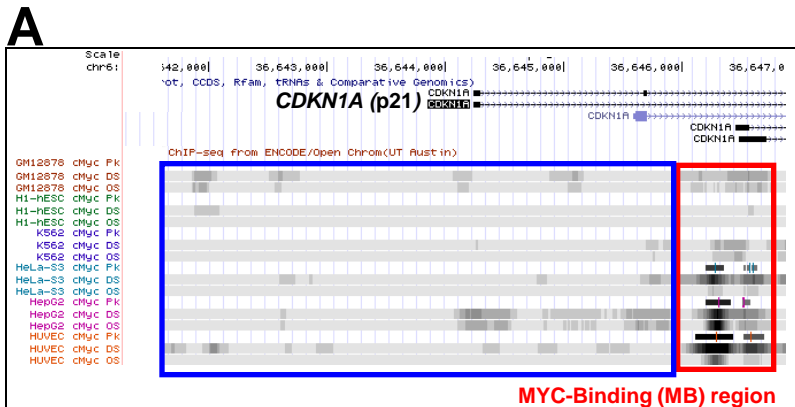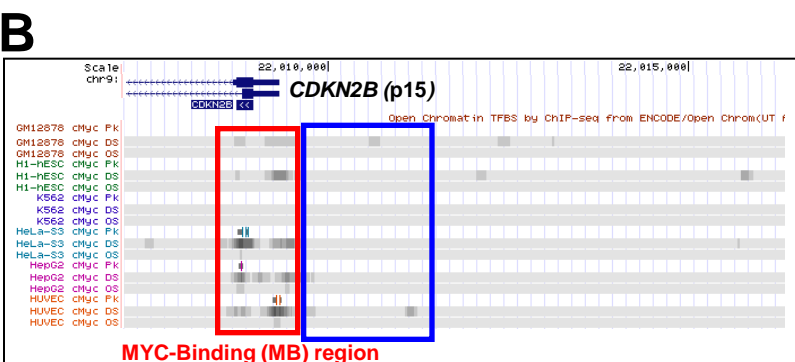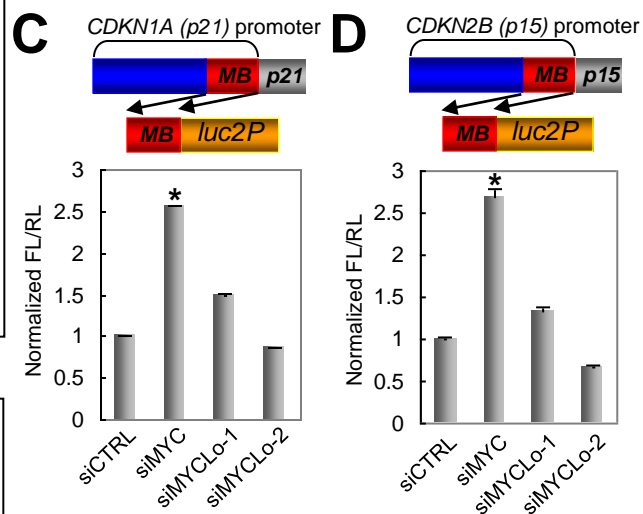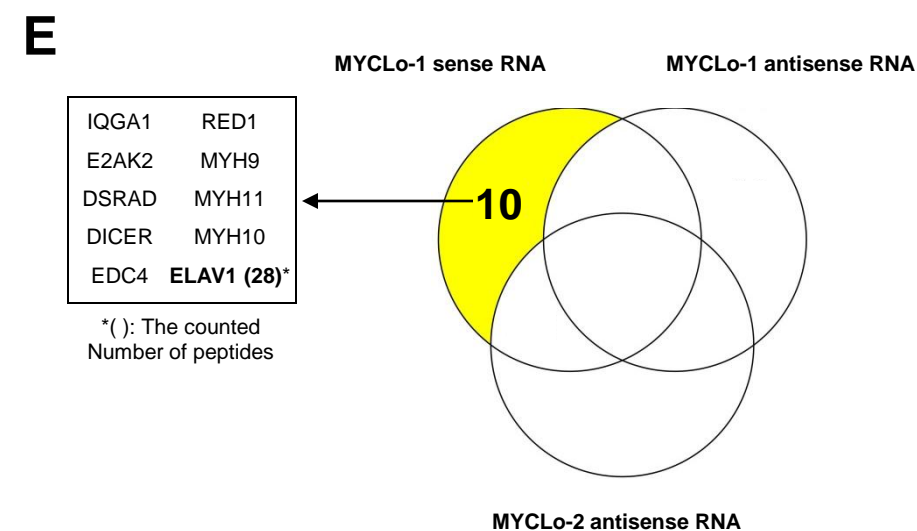

**G**

| RNA                 | HuR binding probability |                |
|---------------------|-------------------------|----------------|
|                     | RF classifier           | SVM classifier |
| MYCLo-1             | 0.7                     | 0.9            |
| MYCLo-1 (401~690bp) | 0.65                    | 0.95           |
| CDH2                | 0.8                     | 0.91           |
| DEK                 | 0.6                     | 0.77           |

- RIPSeq range 0~1  
- Positive >0.5

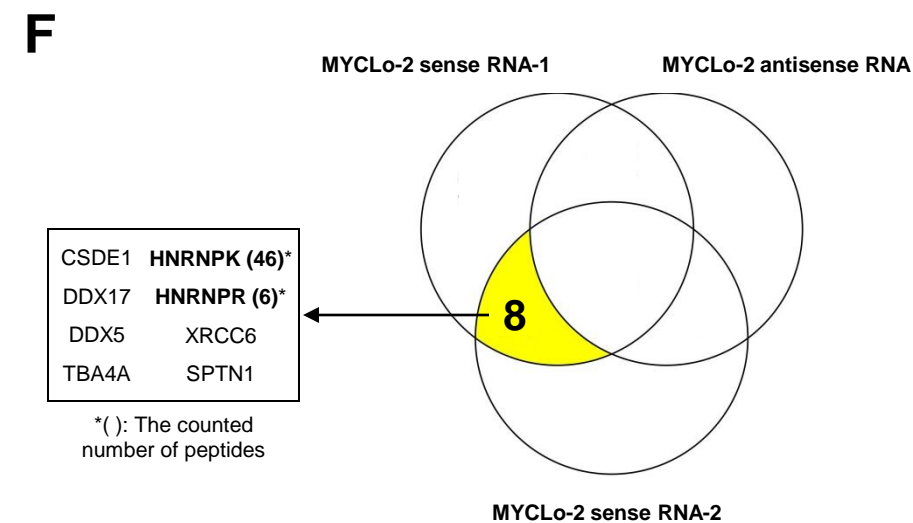

**H**

| RNA                        | hnRNP binding probability |                |
|----------------------------|---------------------------|----------------|
|                            | RF classifier             | SVM classifier |
| MYCLo-2                    | 0.7                       | 0.56           |
| MYCLo-2 (61-180)           | 0.55                      | 0.72           |
| MYCLo-2 (608-658)          | 0.5                       | 0.76           |
| lincRNA-p21 (Mus musculus) | 0.7                       | 0.69           |
| COX2                       | 0.7                       | 0.97           |
| CYTB                       | 0.6                       | 0.96           |

- RIPSeq range 0~1  
- Positive >0.5

**Supplementary Figure 4 (related to Figure 4). Interaction of MYCLOs with RNA binding proteins, such as HuR and hnRNPk, modulate 5' promoter activities of *CDKN1A* and *CDKN2B*, independent of MYC binding.** A) Schematic view of *CDKN1A* (p21) 5' promoter and MYC binding region (Database of open chromatin TFBS by ChIP-seq from ENCODE/Open Chrom (UT Austin)). Boxed regions indicate the 5' promoter region cloned into pGL4 luciferase vectors (red box, Supplementary Figure 4C; blue box, Figure 4A). B) Schematic view of *CDKN2B* (p15) 5' promoter and MYC binding region (Database of open chromatin TFBS by ChIP-seq from ENCODE/Open Chrom (UT Austin)). Boxed regions indicate the 5' promoter region cloned into pGL4 luciferase vectors (red box, Supplementary Figure 4D; blue box, Figure 4B). C and D) (Top) Schematics of pGL4 luciferase vectors inserted with proximal MYC binding regions in 5' promoters of *CDKN1A* (C) and *CDKN2B* (D). (Bottom) Luciferase reporter assays representing transcription activity of the proximal MYC binding regions of *CDKN1A* (C) and *CDKN2B* (D) in HCT116 cells transfected with the pGL4 luciferase vectors and siRNAs as indicated. Data are mean  $\pm$  S.D. of three independent experiments and each measured in triplicate (\*\*,  $P < 0.05$ ; \*,  $P = < 0.01$ ). E and F) Identification of specific MYCLO-1 (E) and MYCLO-2 (F) binding proteins using LC-MS/MS. G and H) Prediction results of interaction probability of HuR/MYCLO-1 (G) and hnRNPk/MYCLO-2 (H). Similar to the prediction results using full-length sequence of MYCLO-1/2, the prediction results using partial sequence of MYCLO-1 (G) and MYCLO-2 (H) are also highlighted with red boxes. Other RNAs known to interact with the RNA-binding proteins were used as positive controls.

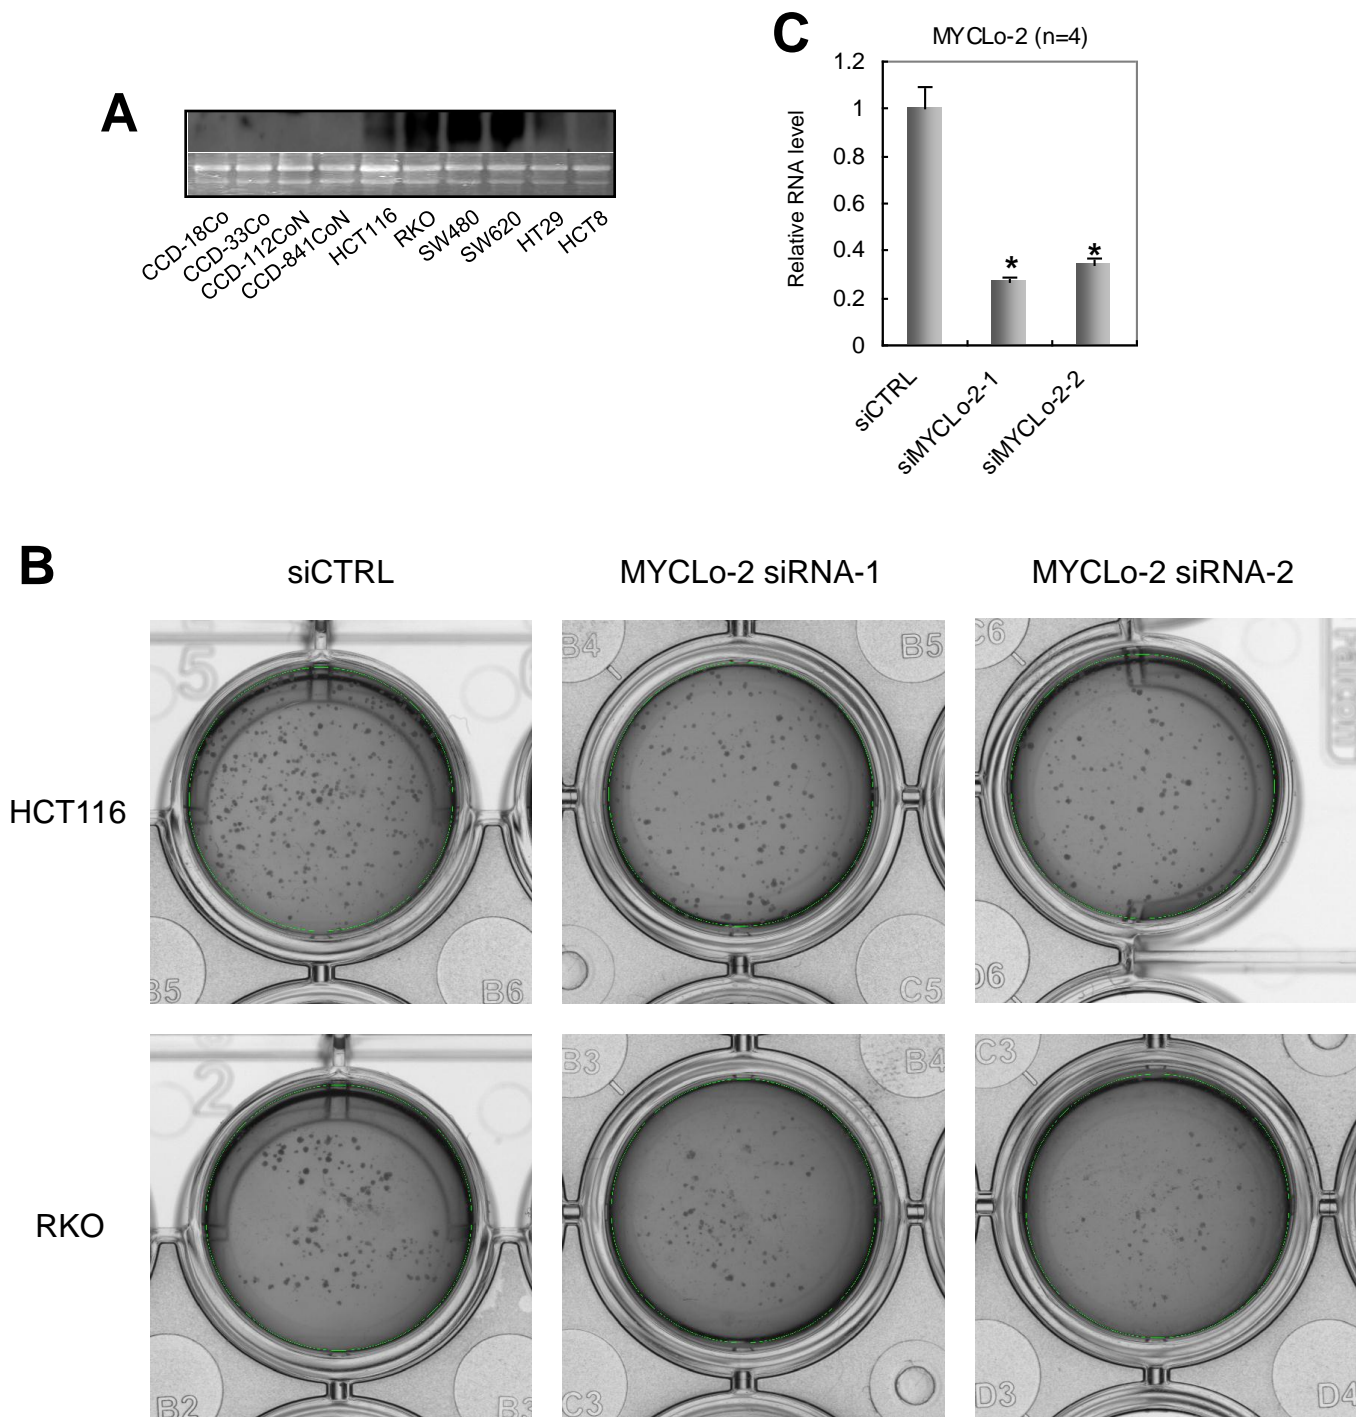

**Supplementary Figure 5 (related to Figure 5). The expression and function of MYCLO-2 in CRC.** A) Northern blot analysis of *MYCLO-2* RNA level in colon-derived cell lines is shown with 18s/28s quantification. B) Representative images of soft agar colony formation assays shown in Figure 5D. C) qRT-PCR results showing the knockdown effect of siRNAs targeting *MYCLO-2* on 10 days after transfection in HCT116 cells. Data are mean  $\pm$  S.D. of four independent experiments and each measured in triplicate (\*,  $P < 0.01$ ).
